# Supplementary material
Source: PubMed Central journal article supplement (PMC5541934)
Supplement: NIHMS884222-supplement-SI.pdf [file NIHMS884222-supplement-SI.pdf]

Supporting Information for:

## **Fluorinated Amine Stereotriads *via* Allene Amination**

Lu Liu, Nels C. Gerstner, Lucas J. Oxtoby, Ilia A. Guzei and Jennifer M. Schomaker\*

Department of Chemistry, University of Wisconsin, Madison, Wisconsin 53706-1396, United States

|                                                                                  |       |
|----------------------------------------------------------------------------------|-------|
| <b>Table of Contents</b> .....                                                   | S-1   |
| <b>I. General Information</b> .....                                              | S-2   |
| <b>II. Preparation of homoallenic sulfamates</b> .....                           | S-3   |
| <b>III. One-pot synthesis of enesulfamates from homoallenic sulfamates</b> ..... | S-7   |
| <b>IV. One-pot synthesis of F-N-O triads from enesulfamates</b> .....            | S-17  |
| <b>V. References</b> .....                                                       | S-52  |
| <b>VI. NMR spectra</b> .....                                                     | S-53  |
| <b>VII. X-ray Crystallographic Data</b> .....                                    | S-157 |
| <b>VIII. References for X-ray</b> .....                                          | S-192 |

**I. General Information.** All glassware was either oven-dried overnight at 130 °C or flame-dried under a stream of dry nitrogen prior to use. Unless otherwise specified, reagents were used as obtained from the vendor without further purification. Tetrahydrofuran and diethyl ether were freshly distilled from purple Na/benzophenone ketyl. Dichloromethane, acetonitrile, toluene, and benzene were dried over CaH<sub>2</sub> and freshly distilled prior to use. All other solvents were purified in accordance with “Purification of Laboratory Chemicals”.<sup>1</sup> Air- and moisture- sensitive reactions were performed using standard Schlenk techniques under an atmosphere of nitrogen. Analytical thin layer chromatography (TLC) was performed utilizing pre-coated silica gel 60 F<sub>254</sub> plates containing a fluorescent indicator, while preparative chromatography was performed using SilicaFlash P60 silica gel (230-400 mesh) via Still’s method.<sup>2</sup> Unless otherwise stated, the mobile phases for column chromatography were mixtures of hexanes/ethyl acetate. Columns were typically run using a gradient method, beginning with 100% hexanes and gradually increasing the polarity using ethyl acetate. Various stains were used to visualize reaction products, including KMnO<sub>4</sub> and ceric ammonium molybdate (CAM stain).

<sup>1</sup>H NMR and <sup>13</sup>C NMR spectra were obtained using either a Bruker-400, Bruker Callisto-500, Bruker Persephone-500, or Bruker Phoebe-600 spectrometers. <sup>19</sup>F NMR was obtained using Bruker-400, Bruker Persephone-500, or Bruker Phoebe-600 spectrometers. For <sup>1</sup>H NMR, chemical shifts are reported relative to residual protiated solvent peaks ( $\delta$  7.26, 7.15 and 7.09 ppm for CDCl<sub>3</sub>, C<sub>6</sub>D<sub>6</sub> and CD<sub>3</sub>C<sub>6</sub>D<sub>5</sub> respectively). <sup>13</sup>C NMR spectra were measured at either 151, 126 MHz, or 101 MHz on the same instruments noted above for recording <sup>1</sup>H NMR spectra. Chemical shifts were again reported in accordance to residual protiated solvent peaks ( $\delta$  77.2, 128.0 and 137.9 ppm for CDCl<sub>3</sub>, C<sub>6</sub>D<sub>6</sub>, and CD<sub>3</sub>C<sub>6</sub>D<sub>5</sub>, respectively). For <sup>19</sup>F NMR, chemical shifts are reported referenced to <sup>1</sup>H NMR. Accurate mass measurements were acquired at the

University of Wisconsin, Madison using a Micromass LCT (electrospray ionization, time-of-flight analyzer or electron impact methods). The NMR and Mass Spectrometry facilities are funded by the NSF (CHE-9974839, CHE-9304546, CHE-9208463, CHE-9629688) and the University of Wisconsin, as well as the NIH (RR08389-01). The Q Exactive Plus mass spectrometer was funded through the NIH (1S10OD020022-1).

**II. Preparation of homoallenic sulfamates.** General procedure: The following procedure is taken from a literature procedure published by Du Bois.<sup>3</sup> Formic acid (2.2 equiv) was added slowly to a rapidly stirred solution of neat chlorosulfonyl isocyanate (CSI, 2.2 equiv) at 0 °C. During the addition process, vigorous gas evolution and solidification of the reaction mixture to a white solid were observed. Dry acetonitrile was added to the resulting white solid to make 0.55 M solution of CSI. The reaction mixture was warmed to 23 °C. After stirring overnight, the mixture was cooled to 0 °C and a solution of the corresponding homoallenic alcohol (1.0 equiv) in N,N-dimethylacetamide (DMA, same volume as for acetonitrile) was added via syringe. The reaction was warmed to room temperature and stirred until TLC indicated completion of the reaction. The reaction mixture was quenched by adding H<sub>2</sub>O, and poured into a separatory funnel containing Et<sub>2</sub>O. The aqueous layer was extracted three times with Et<sub>2</sub>O and the combined organic layers were washed five times with H<sub>2</sub>O, once with brine and dried over Na<sub>2</sub>SO<sub>4</sub>. The solution was decanted and concentrated by rotary evaporation, yielding a crude product that was purified by silica gel chromatography (Et<sub>2</sub>O/hexanes, with gradient) to afford the homoallenic sulfamates.

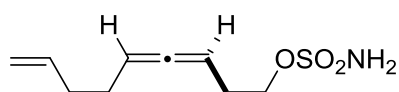

**Precursor to compound 13.** An oven-dried two-necked round-bottom flask fitted with a stir bar was charged with chlorosulfonyl isocyanate (4.10 g, 29.0 mmol, 2.0 equiv) and cooled to 0 °C. Formic acid (1.33 g, 28.9 mmol, 2.0 equiv) was added dropwise to the same flask over ca. two minutes, followed by addition of 29 mL distilled CH<sub>3</sub>CN. The reaction mixture was warmed to room temperature and stirred for 15 hours. The reaction was then cooled to 0 °C again and 1.97 g (14.3 mmol, 1.0 equiv) of the alcohol in 29 mL of DMA was added all at once *via* syringe to the reaction. The reaction was warmed to room temperature and stirred for 45 minutes. The reaction mixture was quenched by adding 40 mL H<sub>2</sub>O, then poured into a separatory funnel containing an equal volume of Et<sub>2</sub>O. The aqueous layer was extracted three times with 30 mL portions of Et<sub>2</sub>O and the combined organic layers were washed seven times with 10 mL H<sub>2</sub>O for each wash. The organic layer was then washed once with brine and dried over Na<sub>2</sub>SO<sub>4</sub>. After silica gel chromatography (carried out using a gradient method with initial starting mobile phase consisting of 1:9 Et<sub>2</sub>O:hexanes, with a gradual increase to a ratio of 1:1 Et<sub>2</sub>O:hexanes in 10% increments; CAM stain), 1.87 g (8.61 mmol, 60% yield) of the sulfamate was obtained as a clear oil. <sup>1</sup>H NMR (500 MHz, CDCl<sub>3</sub>) δ 5.83 (ddt, *J* = 16.8, 10.2, 6.4 Hz, 1H), 5.20 (qt, *J* = 6.2, 2.9 Hz, 1H), 5.11 (qt, *J* = 6.4, 3.0 Hz, 1H), 5.04 (dq, *J* = 17.1, 1.7 Hz, 1H), 5.01 – 4.97 (m, 1H), 4.84 – 4.72 (m, 2H), 4.26 (t, *J* = 6.8 Hz, 2H), 2.44 (qd, *J* = 6.7, 2.9 Hz, 2H), 2.20 – 2.14 (m, 2H), 2.14 – 2.06 (m, 2H). <sup>13</sup>C NMR (126 MHz, CDCl<sub>3</sub>) δ 204.9, 138.1, 115.2, 91.9, 86.1, 70.6, 33.2, 28.6, 28.1. HRMS (ESI) *m/z* calculated for C<sub>9</sub>H<sub>15</sub>NO<sub>3</sub>S [M+NH<sub>4</sub>]<sup>+</sup> 235.1111, found 235.1110.

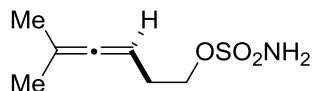

**Precursor to compound 16.** An oven-dried three-necked round bottom flask fitted with a stir bar was charged with chlorosulfonyl isocyanate (13.8 g, 97.5 mmol, 2.2 equiv) and cooled to 0

°C. Formic acid (4.50 g, 97.8 mmol, 2.2 equiv) was added dropwise to the same flask over ca. 10 minutes, followed by addition of 81 mL distilled CH<sub>3</sub>CN. The reaction mixture was warmed to room temperature and stirred for 12 hours. The reaction was then cooled to 0 °C and 4.98 g (44.4 mmol, 1.0 equiv) of the alcohol in 81 mL of DMA was added all at once *via* syringe. The mixture was warmed to room temperature and stirred for ca. 2.5 hours. The reaction mixture was quenched by adding 130 mL H<sub>2</sub>O, and poured into a separatory funnel containing an equal volume of Et<sub>2</sub>O. The aqueous layer was extracted three times with Et<sub>2</sub>O and the combined organic layers were washed five times with 45 mL portions of H<sub>2</sub>O. The organic layer was then washed once with brine and dried over Na<sub>2</sub>SO<sub>4</sub>. After silica gel chromatography (carried out using a gradient method with initial starting mobile phase consisting of 0:1 Et<sub>2</sub>O:hexanes, with a gradual increase to a ratio of 1:1 in 10% increments; CAM stain), 6.79 g (35.5 mmol, 80% yield) of the sulfamate was yielded as a white solid. <sup>1</sup>H NMR (500 MHz, CDCl<sub>3</sub>) δ 4.95 (qq, *J* = 6.0, 2.9 Hz, 1H), 4.75 (bs, 2H), 4.24 (t, *J* = 6.9 Hz, 2H), 2.40 (q, *J* = 6.8 Hz, 2H), 1.69 (d, *J* = 2.9 Hz, 6H). <sup>13</sup>C NMR (126 MHz, CDCl<sub>3</sub>) δ 202.8, 96.8, 83.5, 70.8, 28.8, 20.7. HRMS (ESI) *m/z* calculated for C<sub>7</sub>H<sub>13</sub>NO<sub>3</sub>S [M+Na]<sup>+</sup> 214.0508, found 214.0508.

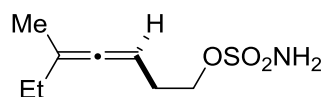

**Precursor to compound 17.** An oven-dried three-necked round bottom flask fitted with a stir bar was charged with chlorosulfonyl isocyanate (18.7 g, 132 mmol, 2.2 equiv) and cooled to 0 °C. Formic acid (6.10 g, 133 mmol, 2.2 equiv) was added dropwise to the same flask over ca. 15 minutes, followed by addition of 110 mL distilled CH<sub>3</sub>CN. The reaction mixture was warmed to room temperature and stirred for 12 hours. The reaction was then cooled to 0 °C and 7.56 g (59.9 mmol, 1.0 equiv) of the alcohol in 110 mL of DMA was added all at once *via* syringe. The

mixture was warmed to room temperature and stirred for 3 hours. The reaction mixture was quenched by adding 180 mL H<sub>2</sub>O, and poured into a separatory funnel containing an equal volume of Et<sub>2</sub>O. The aqueous layer was extracted three times with Et<sub>2</sub>O and the combined organic layers were washed five times with ca. 60 mL portions of H<sub>2</sub>O. The organic layer was then washed once with brine and dried over Na<sub>2</sub>SO<sub>4</sub>. After silica gel chromatography (carried out using a gradient method with initial starting mobile phase consisting of 0:1 Et<sub>2</sub>O:hexanes, with a gradual increase to a ratio of 1:1 in 10% increments; CAM stain), 6.51 g of the homoallylic enesulfamate (31.7 mmol, 53%) was obtained as a clear, light yellow oil. <sup>1</sup>H NMR (500 MHz, CDCl<sub>3</sub>) δ 5.05 (th, *J* = 6.0, 2.9 Hz, 1H), 4.77 (bs, 2H), 4.24 (t, *J* = 6.9 Hz, 2H), 2.41 (q, *J* = 6.8 Hz, 2H), 1.94 (qd, *J* = 7.4, 3.2 Hz, 2H), 1.69 (d, *J* = 2.8 Hz, 3H), 0.99 (t, *J* = 7.4 Hz, 3H). <sup>13</sup>C NMR (126 MHz, CDCl<sub>3</sub>) δ 202.0, 103.1, 85.5, 70.9, 29.0, 27.0, 19.2, 12.3. HRMS (ESI) *m/z* calculated for C<sub>8</sub>H<sub>15</sub>NO<sub>3</sub>S [M-H]<sup>-</sup> 204.0700, found 204.0702.

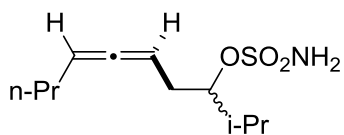

**Precursor to compound 20.** An oven-dried three-necked round bottom flask fitted with a stir bar was charged with chlorosulfonyl isocyanate (1.79 g, 12.7 mmol, 2.4 equiv) and cooled to 0 °C. Formic acid (0.573 g, 12.5 mmol, 2.3 equiv) was added dropwise to the same flask over ca. 1 minute, followed by addition of 11.4 mL distilled CH<sub>3</sub>CN. The reaction mixture was warmed to room temperature and stirred for 12 hours. The reaction was then cooled to 0 °C and 0.894 g (5.32 mmol, 1.0 equiv) of the alcohol in 11.4 mL of DMA was added all at once *via* syringe. The reaction was warmed to room temperature and stirred for 3 hours. The reaction mixture was quenched by adding 20 mL H<sub>2</sub>O, and poured into a separatory funnel containing an equal volume

of Et<sub>2</sub>O. The aqueous layer was extracted three times with Et<sub>2</sub>O and the combined organic layers were washed five times with ca. 6 mL portions of H<sub>2</sub>O. The organic layer was washed once with brine and dried over Na<sub>2</sub>SO<sub>4</sub>. After silica gel chromatography (carried out using a gradient method with an initial starting mobile phase consisting of 0:1 Et<sub>2</sub>O:hexanes, with a gradual increase to a ratio of 1:1 in 10% increments; CAM stain), 0.855 g (3.46 mmol, 65%) of the homoallenic sulfamate was obtained as a diastereomeric mixture with a ratio close to 1:1. The product is a clear oil. <sup>1</sup>H NMR (500 MHz, CDCl<sub>3</sub>) δ 5.17 – 5.03 (m, 2H), 4.65 (bs, 2H), 4.47 (qd, *J* = 6.1, 1.3 Hz, 1H), 2.48 – 2.43 (m, 2H), 2.17 – 2.05 (m, 1H), 2.01 – 1.94 (m, 2H), 1.43 (h, *J* = 7.3 Hz, 2H), 0.99 (ddd, *J* = 8.7, 6.8, 2.3 Hz, 6H), 0.93 (t, *J* = 7.4 Hz, 3H). <sup>13</sup>C NMR (126 MHz, CDCl<sub>3</sub>) δ 205.5, 205.4, 91.6, 91.5, 89.3, 89.2, 85.9, 85.7, 31.7, 31.4, 31.0, 31.0, 30.9, 30.9, 22.5, 22.5, 18.5, 18.4, 17.5, 17.3, 13.8, 13.8. HRMS (ESI) *m/z* calculated for C<sub>11</sub>H<sub>21</sub>NO<sub>3</sub>S [M-H]<sup>-</sup> 246.1169, found 246.1170.

### III. One-pot synthesis of enesulfamates from homoallenic sulfamates.

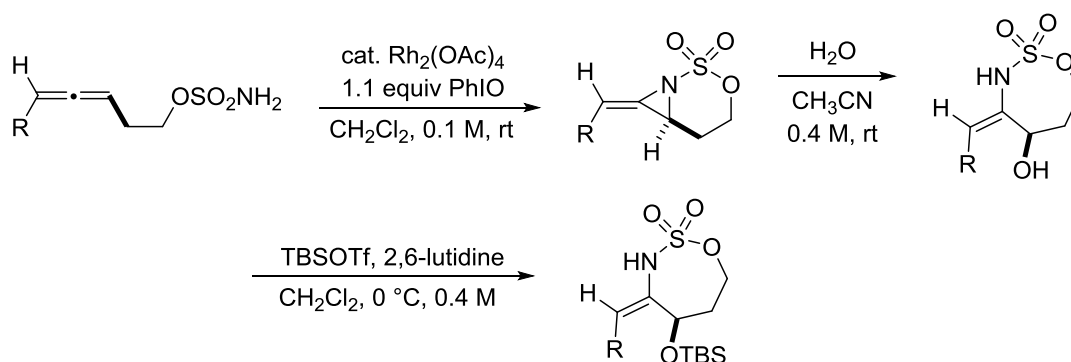

General procedure: To a flame-dried round bottom flask equipped with a stir bar was added the corresponding homoallenic sulfamate (1.0 equiv) and Rh<sub>2</sub>(OAc)<sub>4</sub> (0.0075 equiv). Dry CH<sub>2</sub>Cl<sub>2</sub> was added to prepare a 0.1 M solution. The mixture was stirred vigorously at room temperature for 5 min to yield a green-blue solution. Iodosylbenzene (1.1 equiv) was added in one portion,

and the resulting mixture was stirred at room temperature for approximately 1 hour (for trisubstituted homoallenic sulfamate, the stirring time was increased to 75 minutes). Upon completion, the solution was concentrated by rotary evaporation. CH<sub>3</sub>CN was added to the residue to prepare a 0.4 M solution, followed by the addition of Millipore water (20 equiv). The solution was stirred at room temperature for approximately 1 hour, poured into an Erlenmeyer flask and diluted by a factor of 2-3 with CH<sub>2</sub>Cl<sub>2</sub>. The solution was dried over Na<sub>2</sub>SO<sub>4</sub> until the initially cloudy solution turned clear. The resulting solution was decanted and the residue was washed twice with CH<sub>2</sub>Cl<sub>2</sub>. The organic portions were combined and concentrated by rotary evaporation. Dry CH<sub>2</sub>Cl<sub>2</sub> (0.4 M) was then added to the residue to prepare a 0.4 M solution, which was cooled to 0 °C. A single portion of 2,6-lutidine (1.2 equiv) was added, followed by the slow addition of TBSOTf (1.2 equiv). The reaction was stirred at 0 °C for 30 minutes. The mixture was then quenched by addition of saturated NH<sub>4</sub>Cl solution. The aqueous layer was extracted three times with CH<sub>2</sub>Cl<sub>2</sub>, and the combined organic layers were washed once with brine. The organic layer was dried over Na<sub>2</sub>SO<sub>4</sub> and concentrated by rotary evaporation to yield a crude oil that is purified by silica gel chromatography to afford the (*E*)-enesulfamate, typically as a clear oil.

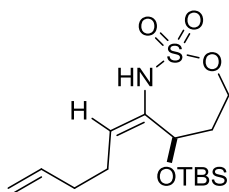

**Compound 13.** To a flame-dried round bottom flask equipped with a stir bar was added the corresponding homoallenic sulfamate (0.503 g, 2.31 mmol, 1.0 equiv) and Rh<sub>2</sub>(OAc)<sub>4</sub> (0.0110 g, 0.0249 mmol, 0.0108 equiv). A portion of 23 mL dry CH<sub>2</sub>Cl<sub>2</sub> was added to prepare a 0.1 M



solution. Iodosylbenzene (0.610 g, 2.77 mmol, 1.2 equiv) was added in one portion. After vigorous stirring at room temperature for 25 minutes, 0.680 g of 4 Å MS was added to the reaction mixture. After another 10 minutes, the reaction mixture was filtered through a pad of celite. The celite cake was rinsed with CH<sub>2</sub>Cl<sub>2</sub> and CH<sub>2</sub>Cl<sub>2</sub> was removed from the combined organics *in vacuo*. To the crude aziridine product was added 5.8 mL CH<sub>3</sub>CN, followed by 0.25 mL (0.25 g, 0.0139 mmol, 0.006 equiv) Millipore water. After 2.5 hours of stirring at room temperature, <sup>1</sup>H NMR showed the full consumption of the aziridine. The reaction mixture was diluted with ca. 20 mL with CH<sub>2</sub>Cl<sub>2</sub> and dried over Na<sub>2</sub>SO<sub>4</sub> until the initially cloudy solution turned clear. The resulting solution was decanted and the residue was washed twice with CH<sub>2</sub>Cl<sub>2</sub>. The organic portions were combined and concentrated by rotary evaporation. A portion of 5.8 mL of dry CH<sub>2</sub>Cl<sub>2</sub> was added to the residue to prepare a 0.4 M solution, which was cooled to 0 °C. A single portion of 2,6-lutidine (0.248 g, 2.32 mmol, 1.0 equiv) was added, followed by dropwise addition of TBSOTf (0.610 g, 2.31 mmol, 1.0 equiv) over ca. 1 minute. The reaction was stirred at 0 °C for 90 minutes. The mixture was quenched by addition of saturated NH<sub>4</sub>Cl solution. The aqueous layer was extracted three times with CH<sub>2</sub>Cl<sub>2</sub>, and the combined organic layers were washed once with brine. The organic layer was dried over Na<sub>2</sub>SO<sub>4</sub> and concentrated by rotary evaporation to yield a crude oil that was purified by silica gel chromatography (carried out using a gradient method with the initial starting mobile phase consisting of 0:1 EtOAc:hexanes, with a gradual increase to a ratio of 2:23 in 1% increments; KMnO<sub>4</sub> stain) to afford 0.375 g (1.08 mmol, 47% yield) of **13** as clear oil. <sup>1</sup>H NMR (500 MHz, CDCl<sub>3</sub>) δ 6.36 (s, 1H), 5.86 – 5.71 (m, 2H), 5.09 – 5.04 (m, 1H), 5.03 (dd, *J* = 10.1, 1.7 Hz, 1H), 4.80 (t, *J* = 3.2 Hz, 1H), 4.69 (t, *J* = 12.6 Hz, 1H), 4.16 (dt, *J* = 13.0, 3.2 Hz, 1H), 2.24 – 2.16 (m, 4H), 2.12 (ddt, *J* = 15.1, 12.3, 3.0 Hz, 2H), 1.84 (dt, *J* = 15.0, 3.3 Hz, 1H), 0.90 (s, 9H), 0.10 (s, 3H), 0.08 (s, 3H).

$^{13}\text{C}$  NMR (126 MHz,  $\text{CDCl}_3$ )  $\delta$  137.1, 131.9, 129.4, 116.2, 64.9, 64.7, 37.9, 33.2, 26.5, 25.8, 18.2, -4.7, -4.9. HRMS (ESI)  $m/z$  calculated for  $\text{C}_{15}\text{H}_{29}\text{NO}_4\text{SSi}$   $[\text{M}+\text{NH}_4]^+$  365.1925, found 365.1924.

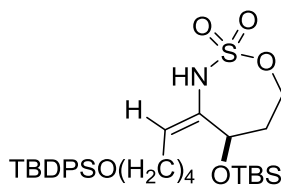

**Compound 14.** To a flame-dried round bottom flask equipped with a stir bar was added the corresponding homoallenenic sulfamate (2.00 g, 4.23 mmol, 1.0 equiv) and  $\text{Rh}_2(\text{OAc})_4$  (0.0198 g, 0.0448 mmol, 0.0075 equiv). 42.2 mL of dry  $\text{CH}_2\text{Cl}_2$  was added to prepare a 0.1 M solution. The mixture was stirred vigorously at room temperature for 5 minutes to yield a green-blue solution. Iodosylbenzene (1.02 g, 4.65 mmol, 1.1 equiv) was added in one portion, and the resulting mixture was stirred at room temperature for ca. 1 hour. The solution was then concentrated by rotary evaporation. A portion of 42.2 mL of  $\text{CH}_3\text{CN}$  was added to the residue to prepare a 0.4 M solution, followed by addition of Millipore water (3.80 g, 211 mmol, 20.0 equiv). The solution was stirred at room temperature for 1 hour, poured into an Erlenmeyer flask and diluted with 120 mL  $\text{CH}_2\text{Cl}_2$ . The solution was dried over  $\text{Na}_2\text{SO}_4$  until the initially cloudy solution turned clear. The resulting solution was decanted and the residue was washed twice with  $\text{CH}_2\text{Cl}_2$ . The organic portions were combined and concentrated by rotary evaporation. A 10.5 mL portion of dry  $\text{CH}_2\text{Cl}_2$  was then added to the residue to prepare a 0.4 M solution, which was cooled to 0 °C. A single portion of 2,6-lutidine (1.10 g, 10.3 mmol, 2.4 equiv) was added, followed by dropwise addition of TBSOTf (2.30 g, 8.71 mmol, 2.1 equiv) over ca. 5 minutes. The reaction was stirred at 0 °C for 30 minutes. The mixture was then quenched by addition of saturated  $\text{NH}_4\text{Cl}$  solution. The aqueous layer was extracted three times with  $\text{CH}_2\text{Cl}_2$ , and the combined organic layers were

washed once with brine. The organic layer was dried over Na<sub>2</sub>SO<sub>4</sub> and concentrated by rotary evaporation to yield a crude oil that was purified by silica gel chromatography (carried out using a gradient method with initial starting mobile phase consisting of 0:1 EtOAc:hexanes, with a gradual increase to a ratio of 3:17 in 3% increments; KMnO<sub>4</sub> stain) to afford 1.09 g (1.80 mmol, 43%) of **14** as a white solid. <sup>1</sup>H NMR (500 MHz, CDCl<sub>3</sub>) δ 7.68 – 7.64 (m, 4H), 7.45 – 7.35 (m, 6H), 6.35 (bs, 1H), 5.73 (t, *J* = 7.8 Hz, 1H), 4.78 (t, *J* = 3.1 Hz, 1H), 4.67 (t, *J* = 12.6 Hz, 1H), 4.13 (dt, *J* = 13.0, 3.2 Hz, 1H), 3.66 (t, *J* = 5.8 Hz, 2H), 2.14 – 2.01 (m, 3H), 1.81 (dt, *J* = 15.3, 3.3 Hz, 1H), 1.62 – 1.48 (m, 4H), 1.04 (s, 9H), 0.89 (s, 9H), 0.09 (s, 3H), 0.06 (s, 3H). <sup>13</sup>C NMR (126 MHz, CDCl<sub>3</sub>) δ 135.7, 134.0, 134.0, 131.5, 130.2, 129.7, 127.8, 64.8, 64.7, 63.6, 37.8, 32.3, 27.0, 26.6, 25.8, 25.6, 19.4, 18.2, -4.8, -4.9. HRMS (ESI) *m/z* calculated for C<sub>31</sub>H<sub>49</sub>NO<sub>5</sub>SSi<sub>2</sub> [M+NH<sub>4</sub>]<sup>+</sup> 621.3208, found 621.3204.

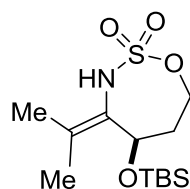

**Compound 16.** To a flame-dried round bottom flask equipped with a stir bar was added the corresponding homoallenlic sulfamate (0.102 g, 0.531 mmol, 1.0 equiv) and Rh<sub>2</sub>(OAc)<sub>4</sub> (0.0034 g, 0.0077 mmol, 0.0145 equiv). A 5 mL portion of dry CH<sub>2</sub>Cl<sub>2</sub> was added to prepare a 0.1 M solution. The mixture was stirred vigorously at room temperature for 5 minutes to yield a green-blue solution. Iodosylbenzene (0.128 g, 0.583 mmol, 1.1 equiv) was added in one portion, and the resulting mixture was stirred at room temperature for 1 hour. The solution was then concentrated by rotary evaporation. A 2.1 mL portion of CH<sub>3</sub>CN was added to the residue to prepare a 0.25 M solution, followed by addition of Millipore water (0.20 g, 11.1 mmol, 21.0 equiv). The solution was stirred at room temperature for 1 hour, poured into an Erlenmeyer flask

and diluted with 6 mL CH<sub>2</sub>Cl<sub>2</sub>. The solution was dried over Na<sub>2</sub>SO<sub>4</sub> until the initially cloudy solution turned clear. The resulting solution was decanted and the residue was washed twice with CH<sub>2</sub>Cl<sub>2</sub>. The organic portions were combined and concentrated by rotary evaporation. A 1.3 mL portion of dry CH<sub>2</sub>Cl<sub>2</sub> was then added to the residue to prepare a 0.4 M solution, which was cooled to 0 °C. A single portion of 2,6-lutidine (0.0920 g, 0.859 mmol, 1.6 equiv) was added, followed by dropwise addition of TBSOTf (0.138 g, 0.621 mmol, 1.2 equiv) over ca. 1 minute. The reaction was stirred at 0 °C for 30 minutes. The mixture was quenched by addition of saturated NH<sub>4</sub>Cl solution. The aqueous layer was extracted three times with CH<sub>2</sub>Cl<sub>2</sub> and the combined organic layers were washed once with brine. The organic layer was dried over Na<sub>2</sub>SO<sub>4</sub> and concentrated by rotary evaporation to yield a crude oil that was purified by silica gel chromatography (carried out using a gradient method with initial starting mobile phase consisting of 0:1 EtOAc:hexanes, with a gradual increase to a ratio of 3:17 in 3% increments) to yield 53.2 mg of the enesulfamate (0.165 mmol, 31%) as a white solid. <sup>1</sup>H NMR (500 MHz, CDCl<sub>3</sub>) δ 6.20 (bs, 1H), 4.87 (t, *J* = 3.1 Hz, 1H), 4.70 (t, *J* = 12.5 Hz, 1H), 4.14 (dt, *J* = 12.9, 3.2 Hz, 1H), 2.08 (ddt, *J* = 15.2, 12.3, 3.2 Hz, 1H), 1.92 (s, 3H), 1.81 (dt, *J* = 14.8, 3 Hz, 1H), 1.76 (s, 3H), 0.89 (s, 9H), 0.08 (s, 3H), 0.05 (s, 3H). <sup>13</sup>C NMR (126 MHz, CDCl<sub>3</sub>) δ 133.7, 125.4, 65.8, 64.5, 37.0, 25.8, 20.6, 19.0, 18.2, -4.8, -5.0. HRMS (ESI) *m/z* calculated for C<sub>13</sub>H<sub>27</sub>NO<sub>4</sub>SSi [M-H]<sup>-</sup> 320.1357, found 320.1358.

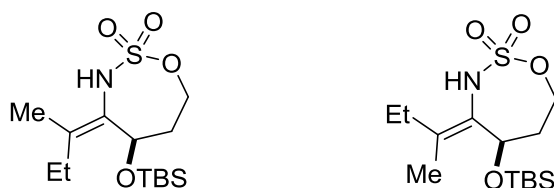

**Compound 17.** To a flame-dried round bottom flask equipped with a stir bar was added the corresponding homoallylic sulfamate (1.52 g, 7.39 mmol, 1.0 equiv) and  $\text{Rh}_2(\text{OAc})_4$  (0.0274 g, 0.0620 mmol, 0.0084 equiv). A 78 mL portion of dry  $\text{CH}_2\text{Cl}_2$  was added to prepare a 0.1 M solution. The mixture was stirred vigorously at room temperature for 5 minutes to yield a green-blue solution. Iodosylbenzene (1.78 g, 8.09 mmol, 1.1 equiv) was added in one portion, and the resulting mixture was stirred at room temperature for 1.5 hour. The solution was then concentrated by rotary evaporation. A 18.3 mL portion of  $\text{CH}_3\text{CN}$  was added to the residue to prepare a 0.4 M solution, followed by addition of Millipore water (2.60 g, 144 mmol, 20.0 equiv). The solution was stirred at room temperature for 1 hour, poured into an Erlenmeyer flask and diluted with ca. 60 mL  $\text{CH}_2\text{Cl}_2$ . The solution was dried over  $\text{Na}_2\text{SO}_4$  until the initially cloudy solution turned clear. The resulting solution was decanted and the residue was washed twice with  $\text{CH}_2\text{Cl}_2$ . The organic portions were combined and concentrated by rotary evaporation. A portion of 18 mL of dry  $\text{CH}_2\text{Cl}_2$  was then added to the residue to prepare a 0.4 M solution, which was cooled to 0 °C. A single portion of 2,6-lutidine (0.920 g, 8.59 mmol, 1.2 equiv) was added, followed by dropwise addition of TBSOTf (3.07 g, 11.6 mmol, 1.6 equiv) over ca. 10 minutes. The reaction was stirred at 0 °C for 30 minutes. The mixture was quenched by addition of saturated  $\text{NH}_4\text{Cl}$  solution. The aqueous layer was extracted three times with  $\text{CH}_2\text{Cl}_2$  and the combined organic layers were washed once with brine. The organic layer was dried over  $\text{Na}_2\text{SO}_4$  and concentrated by rotary evaporation to yield a crude oil that was purified by silica gel chromatography (carried out using a gradient method with initial starting mobile phase consisting of 0:1 EtOAc:hexanes, with a gradual increase to a ratio of 1:19 in 1% increments;  $\text{KMnO}_4$  stain). The product was obtained as 0.546 g (1.63 mmol, 22%) of enesulfamate **17** isolated as an isomeric mixture (*E:Z* ratio = 6:1).  $^1\text{H}$  NMR (500 MHz,  $\text{CDCl}_3$ )  $\delta$  6.22 (bs, 0.85H),

6.15 (bs, 0.15H), 4.88 (t,  $J = 3.0$  Hz, 0.85H), 4.83 (t,  $J = 3.0$  Hz, 0.15H), 4.68 (t,  $J = 12.5$  Hz, 1H), 4.13 (dt,  $J = 12.9, 3.3$  Hz, 1H), 2.55 (dq,  $J = 14.9, 7.6$  Hz, 0.15H), 2.23 (dq,  $J = 14.9, 7.6$  Hz, 0.15H), 2.18 – 1.99 (m, 2.7H), 1.90 (s, 2.55H), 1.82 (dt,  $J = 15.0, 3.6$  Hz, 1H), 1.73 (s, 0.45H), 1.04 (t,  $J = 7.6$  Hz, 2.55H), 0.99 (t,  $J = 7.5$  Hz, 0.45H), 0.88 (s, 9H), 0.08 (s, 3H), 0.04 (s, 3H). *E* isomer:  $^{13}\text{C}$  NMR (126 MHz,  $\text{CDCl}_3$ )  $\delta$  139.1, 125.2, 65.6, 64.4, 37.5, 25.9, 25.8, 18.1, 17.7, 12.7, -4.7, -4.9. *Z* isomer:  $^{13}\text{C}$  NMR (126 MHz,  $\text{CDCl}_3$ )  $\delta$  138.8, 124.9, 65.9, 64.5, 36.9, 26.4, 18.2, 16.1, 11.8, -4.8, -5.0. HRMS (ESI)  $m/z$  calculated for  $\text{C}_{14}\text{H}_{29}\text{NO}_4\text{SSi}$   $[\text{M}+\text{Na}]^+$  358.1479, found 358.1476. The identity of the major isomer as *E* was confirmed by NOE experiments:

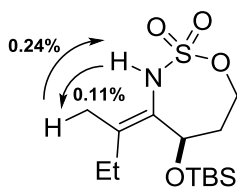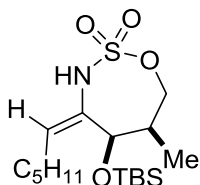

**Compound 18.** Compound **18** was prepared by a modification of the general procedure. To a flame-dried, round bottom flask equipped with a stir bar was added the corresponding homoallenlic sulfamate (2.50 g, 10.7 mmol, 1.0 equiv) and  $\text{Rh}_2(\text{TPA})_4$  (0.145 g, 0.107 mmol, 0.01 equiv). A 108 mL portion of dry  $\text{CH}_2\text{Cl}_2$  was added to prepare a 0.1 M solution. The mixture was stirred vigorously at room temperature for 5 minutes to yield a green-blue solution. Iodosylbenzene (2.83 g, 12.9 mmol, 1.2 equiv) was added in one portion, and the resulting mixture was stirred at room temperature for 1.2 hour. The solution was then concentrated by rotary evaporation. A 53 mL portion of  $\text{CH}_3\text{CN}$  was added to the residue to prepare a 0.2 M

solution, followed by addition of Millipore water (4.0 g, 222 mmol, 21.0 equiv). The solution was stirred at room temperature for 1 hour, poured into an Erlenmeyer flask and diluted with 160 mL CH<sub>2</sub>Cl<sub>2</sub>. The solution was dried over Na<sub>2</sub>SO<sub>4</sub> until the initially cloudy solution turned clear. The resulting solution was decanted and the residue was washed twice with CH<sub>2</sub>Cl<sub>2</sub>. The organic portions were combined and concentrated by rotary evaporation. The crude alcohol (with a *dr* of 3:1) was purified by silica gel chromatography (carried out using a gradient method with an initial starting mobile phase consisting of 0:1 EtOAc:hexanes, with a gradual increase to a ratio of 7:18 in 4% increments; KMnO<sub>4</sub> stain) to separate the *anti* and *syn* stereoisomers prior to silylation. A 3.5 mL portion of dry CH<sub>2</sub>Cl<sub>2</sub> was added to 0.349 g (1.33 mmol, 1.0 equiv) of the *syn*-isomer to prepare a 0.4 M solution, which was cooled to 0 °C. A single portion of 2,6-lutidine (0.212 g, 1.97 mmol, 1.5 equiv) was added to 0.349 g (1.33 mmol, 1.0 equiv) of the *syn*-isomer, followed by the dropwise addition of TBSOTf (0.702 g, 2.66 mmol, 2.0 equiv) over ca. 1 minute. The reaction was stirred at 0 °C for 30 minutes. The mixture was quenched by addition of saturated NH<sub>4</sub>Cl solution. The aqueous layer was extracted three times with CH<sub>2</sub>Cl<sub>2</sub>, and the combined organic layers were washed once with brine. The organic layer was dried over Na<sub>2</sub>SO<sub>4</sub> and concentrated by rotary evaporation to yield a crude oil that was purified by silica gel chromatography (carried out using a gradient method with an initial starting mobile phase consisting of 0:1 EtOAc:hexanes, with a gradual increase to a ratio of 1:19 in 1% increments; 1% Et<sub>2</sub>O was added to improve separation among diastereomers; KMnO<sub>4</sub> stain). A 0.215 g (0.571 mmol, 43%) portion of compound **18** was obtained as a white solid. <sup>1</sup>H NMR (500 MHz, C<sub>6</sub>D<sub>6</sub>) δ 6.46 (bs, 1H), 5.84 (t, *J* = 7.8 Hz, 1H), 4.31 – 4.22 (m, 2H), 3.27 (dd, *J* = 13.0, 2.7 Hz, 1H), 1.81 – 1.65 (m, 3H), 1.24 – 1.09 (m, 6H), 0.86 (t, *J* = 7.0 Hz, 3H), 0.79 (s, 9H), 0.37 (d, *J* = 7.4 Hz, 3H), -0.14 (s, 3H), -0.14 (s, 3H). <sup>13</sup>C NMR (126 MHz, C<sub>6</sub>D<sub>6</sub>) δ 132.4, 129.7, 69.5, 68.3, 40.4,

31.7, 29.0, 26.7, 25.7, 22.8, 18.2, 14.2, 13.5, -5.1, -5.2. HRMS (ESI) m/z calculated for  $C_{17}H_{35}NO_4SSi$   $[M+NH_4]^+$  395.2394, found 395.2394.

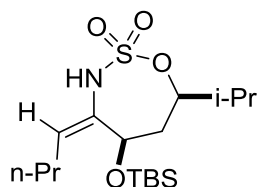

**Compound 20.** Compound **20** was prepared by a modification of the general procedure. To a flame-dried, round bottom flask equipped with a stir bar was added the corresponding homoallenic sulfamate (1.00 g, 4.04 mmol, 1.0 equiv) and  $Rh_2(OAc)_4$  (0.0136 g, 0.0308 mmol, 0.0076 equiv). A 40 mL portion of dry  $CH_2Cl_2$  was added to prepare a 0.1 M solution. The mixture was stirred vigorously at room temperature for 5 min to yield a green-blue solution. Iodosylbenzene (0.980 g, 4.45 mmol, 1.1 equiv) was added in one portion, and the resulting mixture was stirred at room temperature for 1 hour. The solution was concentrated by rotary evaporation and 16 mL of  $CH_3CN$  added to the residue to prepare a 0.25 M solution, followed by addition of Millipore water (1.45 g, 80.6mmol, 20.0 equiv). The solution was stirred at room temperature for 1 hour, poured into an Erlenmeyer flask and diluted with ca. 50 mL  $CH_2Cl_2$ . The solution was dried over  $Na_2SO_4$  until the initially cloudy solution turned clear. The resulting solution was decanted and the residue was washed twice with  $CH_2Cl_2$ . The organic portions were combined and concentrated by rotary evaporation. The crude alcohol was purified by silica gel chromatography (carried out using a gradient method with an initial starting mobile phase consisting of 0:1 EtOAc:hexanes, with a gradual increase to a ratio of 2:3 in 5% increments;  $KMnO_4$  stain) to yield 0.202 g of the *syn* stereoisomer (0.767 mmol, 19%) prior to silylation. A 2 mL portion of dry  $CH_2Cl_2$  was added to 0.202 g (0.767 mmol, 1.0 equiv) of the *syn*-isomer to



prepare a 0.4 M solution, which was cooled to 0 °C. A single portion of 2,6-lutidine (0.101 g, 0.944 mmol, 1.2 equiv) was added, followed by dropwise addition of TBSOTf (0.207 g, 0.932 mmol, 1.2 equiv) over ca. 1 minute. The reaction was stirred at 0 °C for 30 minutes. The mixture was quenched by addition of saturated NH<sub>4</sub>Cl solution. The aqueous layer was extracted three times with CH<sub>2</sub>Cl<sub>2</sub> and the combined organic layers were washed once with brine. The organic layer was dried over Na<sub>2</sub>SO<sub>4</sub> and concentrated by rotary evaporation to yield a crude oil that was purified by silica gel chromatography (carried out using a gradient method with an initial starting mobile phase consisting of 0:1 EtOAc:hexanes, with a gradual increase to a ratio of 1:17 in 3% increments; KMnO<sub>4</sub> stain). A 0.120 g portion of compound **20** (0.318 mmol, 41%) was obtained as a white solid. <sup>1</sup>H NMR (500 MHz, CDCl<sub>3</sub>) δ 6.08 (bs, 1H), 5.86 (t, *J* = 7.8 Hz, 1H), 4.80 (dd, *J* = 7.8, 3.9 Hz, 1H), 4.30 (ddd, *J* = 11.1, 5.4, 2.5 Hz, 1H), 2.20 (ddd, *J* = 15.4, 7.8, 2.5 Hz, 1H), 2.16 – 2.02 (m, 3H), 1.82 (o, *J* = 6.9 Hz, 1H), 1.47 (h, *J* = 7.3 Hz, 2H), 0.98 – 0.93 (m, 9H), 0.90 (s, 9H), 0.11 (s, 3H), 0.06 (s, 3H). <sup>13</sup>C NMR (126 MHz, CDCl<sub>3</sub>) δ 133.3, 131.8, 85.6, 67.7, 40.8, 33.0, 29.2, 25.9, 22.5, 18.6, 18.2, 17.4, 14.0, -4.6, -4.8. HRMS (ESI) *m/z* calculated for C<sub>17</sub>H<sub>35</sub>NO<sub>4</sub>SSi [M-H]<sup>-</sup> 376.1983, found 376.1982.

#### IV. One-pot synthesis of F-N-O triads from enesulfamates.

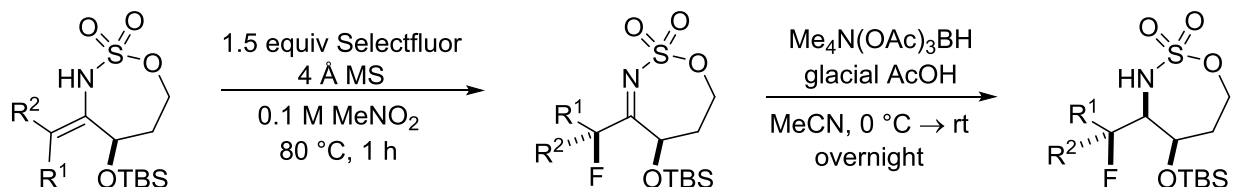

General procedure: To a flame-dried, round bottom flask equipped with a stir bar was added the corresponding enesulfamate (1.0 equiv), Selectfluor (1.5 equiv), and 4 Å MS (same amount as

Selectfluor). Dry  $\text{CH}_3\text{NO}_2$  was added to prepare a 0.1 M solution. The mixture was stirred at 80 °C for 1 hour. The reaction mixture was then filtered through a pad of celite, and the filtrate concentrated by rotary evaporation. Dry  $\text{CH}_3\text{CN}$  ( $\text{CH}_3\text{CN}:\text{CH}_3\text{NO}_2 = 1:1$  v/v) was added to the crude imine, and the reaction mixture was cooled to 0 °C. Glacial AcOH ( $\text{AcOH}:\text{CH}_3\text{CN} = 1:1$  v/v) was added to the flask, followed by addition of  $\text{Me}_4\text{N}(\text{OAc})_3\text{BH}$  (3.0 equiv). The reaction mixture was warmed to rt and stirred overnight, after which TLC indicated complete consumption of the starting material. The reaction mixture was transferred to a separatory funnel containing  $\text{CH}_2\text{Cl}_2$  and washed three times with saturated  $\text{NaHCO}_3$  solution. The aqueous layer was extracted three times with  $\text{CH}_2\text{Cl}_2$ . The combined organic layers were washed once with brine, dried over  $\text{Na}_2\text{SO}_4$ , and concentrated by rotary evaporation to yield the diastereomeric mixture. The crude product was purified by silica gel chromatography (solvents given for each specific compound below) to give the all-*syn* product as the major diastereomer.

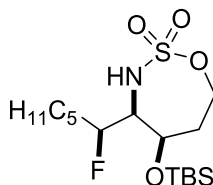

**Compound 7a.** To a flame-dried, round bottom flask equipped with a stir bar was added the enesulfamate **7** (0.500 g, 1.38 mmol, 1.0 equiv), Selectfluor (0.733 g, 2.07 mmol, 1.5 equiv), and 0.737 g of 4 Å MS. Dry  $\text{CH}_3\text{NO}_2$  (13.7 mL) was then added to prepare a 0.1 M solution. The mixture was stirred at 80 °C for 1 hour. The reaction mixture was then filtered through a pad of celite. The celite cake was rinsed with  $\text{CH}_2\text{Cl}_2$ . The combined organics were concentrated by rotary evaporation. Dry  $\text{CH}_3\text{CN}$  (13.7 mL) was added to the crude imine and the reaction mixture was cooled to 0 °C. Glacial AcOH (13.7 mL,  $\text{AcOH}:\text{CH}_3\text{CN} = 1:1$  v/v) was then added to the flask, followed by addition of  $\text{Me}_4\text{N}(\text{OAc})_3\text{BH}$  (1.09 g, 4.13 mmol, 3.0 equiv). The

reaction mixture was warmed up to room temperature and stirred for 3 hours. The reaction mixture was transferred to a separatory funnel containing CH<sub>2</sub>Cl<sub>2</sub> and washed three times with saturated NaHCO<sub>3</sub> solution. The aqueous layer was extracted three times with CH<sub>2</sub>Cl<sub>2</sub>. The combined organic layers were washed once with brine, dried over Na<sub>2</sub>SO<sub>4</sub>, and concentrated by rotary evaporation to yield the diastereomeric mixture, which was purified by silica gel chromatography (carried out using a gradient method with an initial starting mobile phase consisting of 0:1 CH<sub>2</sub>Cl<sub>2</sub>:hexanes, with a gradual increase to a ratio of 7:3 in 10% increments; 1% Et<sub>2</sub>O was added to improve separation among diastereomers; KMnO<sub>4</sub> stain) to give the all-*syn* **7a** as the major diastereomer (0.347 g, 0.906 mmol, 66%) as a white solid. <sup>1</sup>H NMR (500 MHz, C<sub>6</sub>D<sub>6</sub>) δ 5.75 (d, *J* = 10.7 Hz, 1H), 4.63 (t, *J* = 12.4 Hz, 1H), 4.24 (dddd, *J* = 48.2, 9.0, 4.2, 2.3 Hz, 1H), 3.74 (t, *J* = 2.8 Hz, 1H), 3.70 (dt, *J* = 13.0, 3.3 Hz, 1H), 3.30 (ddd, *J* = 25.5, 10.7, 2.3 Hz, 1H), 2.10 – 1.95 (m, 1H), 1.74 – 1.30 (m, 9H), 1.06 (t, *J* = 7.1 Hz, 3H), 1.00 (s, 9H), 0.12 (d, *J* = 1.3 Hz, 3H), 0.00 (s, 3H). <sup>13</sup>C NMR (126 MHz, C<sub>6</sub>D<sub>6</sub>) δ 95.0 (d, *J* = 179.1 Hz), 69.5, 63.8, 58.1 (d, *J* = 18.2 Hz), 37.3, 32.3 (d, *J* = 21.0 Hz), 31.9, 25.9, 25.0 (d, *J* = 4.9 Hz), 22.9, 18.0, 14.2, -4.4, -5.1 (d, *J* = 3.2 Hz). <sup>19</sup>F NMR (471 MHz, C<sub>6</sub>D<sub>6</sub>) δ -193.61 (dddd, *J* = 47.1, 32.0, 25.5, 13.7 Hz). HRMS (ESI) *m/z* calculated for C<sub>16</sub>H<sub>34</sub>FNO<sub>4</sub>SSi [M + H<sup>+</sup>] 384.2035, found 384.2029.

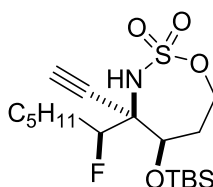

**Compound 8a.** The enesulfamate **5** (0.400 g, 1.10 mmol, 1.0 equiv) was added to a 25 mL round bottom flask, followed by the addition of Selectfluor (0.589 g, 1.65 mmol, 1.5 equiv) and 0.589 g of 4 Å MS. Distilled CH<sub>3</sub>NO<sub>2</sub> (11 mL) was added to make a 0.1 M solution. The reaction was stirred at 80 °C for 1 hour. Dry CH<sub>2</sub>Cl<sub>2</sub> (40 mL) was added to the reaction until no more white

precipitates crashed out. The reaction mixture was then filtered through a pad of celite and concentrated by rotary evaporation to yield the imine. Ethynyl magnesium bromide (6.6 mL, 3.3 mmol, 3.0 equiv) was cooled at 0 °C for at least 15 min before use. Dry THF (2.2 mL) was added to the imine to make a 0.5 M solution. The imine solution was transferred to the cooled ethynyl magnesium bromide via cannula transfer. An extra 1 mL of dry THF was used to ensure quantitative transfer. The reaction was stirred at 0 °C for 60 minutes until complete consumption of the starting material was observed by TLC (CH<sub>2</sub>Cl<sub>2</sub>:hexanes = 1/1, KMnO<sub>4</sub> stain). The reaction was quenched by the addition of 20 mL of saturated NH<sub>4</sub>Cl solution. The mixture was transferred to a separatory funnel, and the organic layer was extracted three times with EtOAc and washed once with saturated NH<sub>4</sub>Cl solution and once with brine, then dried over Na<sub>2</sub>SO<sub>4</sub> and concentrated by rotary evaporation to yield the diastereomeric mixture. The product was purified by column chromatography (carried out using a gradient method with an initial starting mobile phase consisting of 0:1 CH<sub>2</sub>Cl<sub>2</sub>:hexanes, with a gradual increase to a ratio of 1:0 in 10% increments; 1% Et<sub>2</sub>O was added to improve separation among diastereomers; KMnO<sub>4</sub> stain) to give the all-*syn* **8a** as the major diastereomer (0.314 g, 0.771 mmol, 70%). The product is a white solid. <sup>1</sup>H NMR (500 MHz, CDCl<sub>3</sub>) δ 5.35 (bs, 1H), 4.63 (t, *J* = 12.2 Hz, 1H), 4.43 (ddd, *J* = 48.4, 10.5, 2.1 Hz, 1H), 4.22 (dd, *J* = 4.9, 1.8 Hz, 1H), 4.17 (dt, *J* = 12.8, 3.4 Hz, 1H), 2.78 (s, 1H), 2.74 (ddt, *J* = 16.0, 11.6, 2.5 Hz, 1H), 1.99 – 1.87 (m, 1H), 1.82 (dt, *J* = 15.9, 4.1 Hz, 1.5 H), 1.78 – 1.70 (m, 0.5H), 1.63 – 1.52 (m, 1H), 1.42 – 1.26 (m, 5H), 0.93 – 0.86 (m, 12H), 0.10 (s, 6H). <sup>13</sup>C NMR (126 MHz, CDCl<sub>3</sub>) δ 95.9 (d, *J* = 188.9 Hz), 80.8 (d, *J* = 1.4 Hz), 76.3 (d, *J* = 6.0 Hz), 73.8, 64.3, 60.9 (d, *J* = 18.9 Hz), 34.5, 31.6, 30.6 (d, *J* = 21.3 Hz), 25.9, 25.0 (d, *J* = 3.2 Hz), 22.6, 18.1, 14.1, -4.1, -4.9 (d, *J* = 2.2 Hz). <sup>19</sup>F NMR (471 MHz, CDCl<sub>3</sub>) δ -191.34 (ddd, *J* =

48.8, 41.5, 13.5 Hz). HRMS (ESI)  $m/z$  calculated for  $C_{18}H_{34}FNO_4SSi$  [ $M + NH_4^+$ ] 425.2300, found 425.2299.

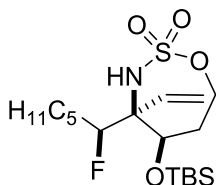

**Compound 9a.** A 0.351 g (0.965 mmol, 1.0 equiv) portion of the enesulfamate **5** was added to a 25 mL round-bottom flask, followed by sequential addition of Selectfluor (0.513g, 1.44 mmol, 1.5 equiv) and 4 Å MS (0.513 g). A portion of  $CH_3NO_2$  (9.6 mL) was added to make a 0.1 M solution and the reaction mixture was stirred at 80 °C for 1 hour. Dry  $CH_2Cl_2$  (40 mL) was added until no more white precipitates crashed out. The reaction mixture was then filtered through a pad of celite and concentrated by rotary evaporation to yield the crude imine. Vinyl magnesium bromide (2.9 mL, 2.89 mmol, 3.0 equiv) was cooled at -78 °C for at least 15 minutes before use. Dry THF (1.9 mL) was added to the imine to make a 0.5 M solution and then transferred to the cooled vinyl magnesium bromide solution via cannula transfer. The reaction mixture was stirred at -78 °C for 30 minutes until complete consumption of the starting material was observed by TLC ( $CH_2Cl_2$ :hexanes = 1:1,  $KMnO_4$  stain). A saturated  $NH_4Cl$  solution (20 mL) was added to quench the reaction, the mixture transferred to a separatory funnel, and the organic layer extracted three times with EtOAc. The combined organics were washed once with brine, dried over  $Na_2SO_4$  and concentrated by rotary evaporation to yield the crude product as a diastereomeric mixture, which was purified by column chromatography (carried out using a gradient method with an initial starting mobile phase consisting of 0:1  $CH_2Cl_2$ :hexanes, with a gradual increase to a ratio of 1:0 in 10% increments; 1%  $Et_2O$  was added to improve separation

among diastereomers; KMnO<sub>4</sub> stain) to give the all- *syn* **9a** as the major diastereomer (0.244 g, 0.597 mmol, 61%) as a white solid. <sup>1</sup>H NMR (500 MHz, CDCl<sub>3</sub>) δ 6.18 (dd, *J* = 18.0, 11.4 Hz, 1H), 5.43 (d, *J* = 11.5 Hz, 1H), 5.30 (d, *J* = 18.0 Hz, 1H), 5.16 (bs, 1H), 4.64 (dd, *J* = 48.0, 11.1 Hz, 1H), 4.52 (dd, *J* = 12.5, 9.1 Hz, 1H), 4.32 (d, *J* = 6.4 Hz, 1H), 4.13 (ddd, *J* = 12.7, 6.8, 2.4 Hz, 1H), 2.31 (dd, *J* = 13.4, 9.2 Hz, 1H), 2.11 (dt, *J* = 14.8, 6.6 Hz, 1H), 1.70 – 1.43 (m, 3H), 1.35 – 1.21 (m, 5H), 0.93 (s, 9H), 0.88 (t, *J* = 6.8 Hz, 3H), 0.11 (s, 3H), 0.11 (s, 3H). <sup>13</sup>C NMR (126 MHz, CDCl<sub>3</sub>) δ 134.1 (d, *J* = 4.4 Hz), 118.2, 96.2 (d, *J* = 185.3 Hz), 74.5, 66.3 (d, *J* = 16.2 Hz), 65.9, 34.6 (d, *J* = 3.5 Hz), 31.6, 29.9 (d, *J* = 21.8 Hz), 26.0, 25.2 (d, *J* = 3.4 Hz), 22.6, 18.1, 14.1, -3.9, -4.8 (d, *J* = 1.5 Hz). <sup>19</sup>F NMR (471 MHz, CDCl<sub>3</sub>) δ -191.22 (td, *J* = 46.2, 13.2 Hz). HRMS (ESI) *m/z* calculated for C<sub>18</sub>H<sub>36</sub>FNO<sub>4</sub>SSi [M + H<sup>+</sup>] 410.2191, found 410.2187.

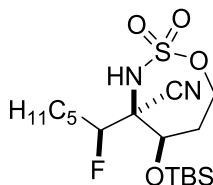

**Compound 10a.** The enesulfamate **5** (0.150 g, 0.413 mmol, 1.0 equiv) was added to a 10 mL round bottom flask, followed by addition of Selectfluor (0.219 g, 0.618 mmol, 1.5 equiv) and 4 Å MS (0.219 g). CH<sub>3</sub>NO<sub>2</sub> (4.1 mL) was added to make a 0.1 M solution and the reaction mixture was stirred at 80 °C for 1 hour. Dry CH<sub>2</sub>Cl<sub>2</sub> (20 mL) was added until no more white precipitate was observed to crash out. The resulting mixture was then filtered through a pad of celite and concentrated by rotary evaporation to yield the crude imine. Dry CH<sub>3</sub>CN (4.1 mL) was added to the imine to make a 0.1 M solution, followed by addition of Bu<sub>4</sub>NCN (0.223 g, 0.834 mmol, 2.0 equiv). The reaction was stirred at room temperature for 2.6 hour until complete consumption of the starting material was observed by TLC (EtOAc/hexanes = 1/1, KMnO<sub>4</sub> stain). The mixture was transferred to a separatory funnel; five times the volume of CH<sub>2</sub>Cl<sub>2</sub> was added. The organic

layer was washed once with NaHCO<sub>3</sub>, once with saturated NH<sub>4</sub>Cl, twice with brine, then dried over Na<sub>2</sub>SO<sub>4</sub> and concentrated by rotary evaporation to yield the product as a mixture of diastereomers. The product was purified by column chromatography (carried out using a gradient method with an initial starting mobile phase consisting of 0:1 CH<sub>2</sub>Cl<sub>2</sub>:hexanes, with a gradual increase to a ratio of 1:0 in 10% increments; 1% Et<sub>2</sub>O was added to improve separation among diastereomers; KMnO<sub>4</sub> stain) to give the all-*syn* **10a** as the major diastereomer (67.2 mg, 0.165 mmol, 40%) as a white solid. <sup>1</sup>H NMR (500 MHz, CDCl<sub>3</sub>) δ 5.33 (bs, 1H), 4.83 (ddd, *J* = 47.0, 10.7, 2.2 Hz, 1H), 4.56 (dd, *J* = 7.0, 1.7 Hz, 1H), 4.51 (ddd, *J* = 12.6, 8.5, 2.0 Hz, 1H), 4.29 (ddd, *J* = 12.6, 6.9, 2.5 Hz, 1H), 2.38 (ddt, *J* = 16.3, 8.5, 2.2 Hz, 1H), 2.26 (dtd, *J* = 16.2, 7.0, 1.9 Hz, 1H), 2.00 – 1.90 (m, 1H), 1.82 (dddd, *J* = 41.3, 14.4, 10.2, 5.9, 2.2 Hz, 1H), 1.68 – 1.57 (m, 1H), 1.48 – 1.39 (m, 1H), 1.38 – 1.30 (m, 4H), 0.94 – 0.88 (m, 12H), 0.17 (s, 3H), 0.15 (s, 3H). <sup>13</sup>C NMR (126 MHz, CDCl<sub>3</sub>) δ 115.5 (d, *J* = 6.5 Hz), 92.9 (d, *J* = 189.6 Hz), 73.9, 66.3, 61.0 (d, *J* = 20.4 Hz), 35.4 (d, *J* = 3.1 Hz), 31.3, 30.9 (d, *J* = 21.1 Hz), 25.8, 24.9 (d, *J* = 3.0 Hz), 22.5, 18.1, 14.0, -4.2, -4.9. <sup>19</sup>F NMR (471 MHz, CDCl<sub>3</sub>) δ -192.49 (ddd, *J* = 47.3, 41.5, 14.5 Hz). HRMS (ESI) *m/z* calculated for C<sub>17</sub>H<sub>33</sub>FN<sub>2</sub>O<sub>4</sub>SSi [M + NH<sub>4</sub><sup>+</sup>] 426.2253, found 426.2245.

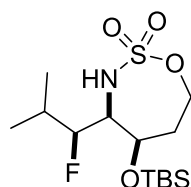

**Compound 11a.** To a flame-dried, round bottom flask equipped with a stir bar was added the corresponding enesulfamate (102 mg, 0.305 mmol, 1.0 equiv), Selectfluor (160 mg, 0.452 mmol, 1.5 equiv) and 4 Å MS (165 mg). Dry CH<sub>3</sub>NO<sub>2</sub> (3 mL) was added to prepare a 0.1 M solution. The mixture was stirred at 80 °C for 1 hour. The reaction mixture was then filtered through a pad

of celite and the filtrate concentrated by rotary evaporation. A 3 mL portion of dry CH<sub>3</sub>CN (CH<sub>3</sub>CN:CH<sub>3</sub>NO<sub>2</sub> = 1:1 v/v) was added to the crude imine, and the reaction mixture was cooled to 0 °C. 3 mL of glacial AcOH (AcOH:CH<sub>3</sub>CN = 1:1 v/v) was added to the flask, followed by addition of Me<sub>4</sub>N(OAc)<sub>3</sub>BH (237 mg, 0.900 mmol, 3.0 equiv). The reaction mixture was warmed up to room temperature and stirred overnight. The reaction mixture was then transferred to a separatory funnel containing CH<sub>2</sub>Cl<sub>2</sub> and washed three times with saturated NaHCO<sub>3</sub> solution. The aqueous layer was extracted three times with CH<sub>2</sub>Cl<sub>2</sub>. The combined organic layers were washed once with brine, dried over Na<sub>2</sub>SO<sub>4</sub>, and concentrated by rotary evaporation to yield the diastereomeric mixture. The crude product was purified by silica gel chromatography (carried out using a gradient method with an initial starting mobile phase consisting of 0:1 EtOAc:hexanes, with a gradual increase to a ratio of 2:3 in 8% increments; 1% Et<sub>2</sub>O was added to improve separation among diastereomers; KMnO<sub>4</sub> stain) to give the all-*syn* product **11a** (20.9 mg, 0.0588 mmol, 19%) as the major diastereomer. The product was a white solid. <sup>1</sup>H NMR (500 MHz, CDCl<sub>3</sub>) δ 5.41 (d, *J* = 10.8 Hz, 1H), 4.64 (t, *J* = 12.4 Hz, 1H), 4.20 (dd, *J* = 4.1, 2.3 Hz, 1H), 4.15 (dt, *J* = 12.8, 3.2 Hz, 1H), 4.04 (ddd, *J* = 47.3, 8.2, 2.3 Hz, 1H), 3.50 (ddd, *J* = 26.2, 10.8, 2.3 Hz, 1H), 2.19 – 2.06 (m, 2H), 1.85 (dt, *J* = 15.4, 3.8 Hz, 1H), 1.01 (dd, *J* = 6.7, 1.5 Hz, 3H), 0.97 (d, *J* = 6.7 Hz, 3H), 0.91 (s, 9H), 0.10 (d, *J* = 1.4 Hz, 3H), 0.09 (s, 3H). <sup>13</sup>C NMR (126 MHz, CDCl<sub>3</sub>) δ 99.5 (d, *J* = 182.8 Hz), 70.1, 64.3, 55.7 (d, *J* = 17.5 Hz), 37.6, 29.7 (d, *J* = 19.9 Hz), 25.9, 18.4 (d, *J* = 7.5 Hz), 18.1, 17.8 (d, *J* = 6.2 Hz), -4.3, -4.9 (d, *J* = 3.2 Hz). <sup>19</sup>F NMR (471 MHz, CDCl<sub>3</sub>) δ -196.82 (ddd, *J* = 47.5, 26.4, 11.9 Hz). HRMS (ESI) *m/z* calculated for C<sub>14</sub>H<sub>30</sub>FNO<sub>4</sub>SSi [M-H]<sup>-</sup> 354.1576, found 354.1577.



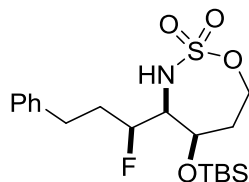

**Compound 12a.** To a flame-dried, round bottom flask equipped with a stir bar was added the enesulfamate **12** (398 mg, 1.00 mmol, 1.0 equiv), Selectfluor (531 mg, 1.50 mmol, 1.5 equiv), and 4 Å MS (531 mg). Dry  $\text{CH}_3\text{NO}_2$  (10 mL) was added to prepare a 0.1 M solution. The mixture was stirred at 80 °C for 1.5 hour. The reaction mixture was then filtered through a pad of celite, and the filtrate concentrated by rotary evaporation. A 10 mL portion of dry  $\text{CH}_3\text{CN}$  ( $\text{CH}_3\text{CN}:\text{CH}_3\text{NO}_2 = 1:1$  v/v) was added to the crude imine, and the reaction mixture was cooled to 0 °C. A 10 mL portion of glacial AcOH ( $\text{AcOH}:\text{CH}_3\text{CN} = 1:1$  v/v) was added to the flask, followed by addition of  $\text{Me}_4\text{N}(\text{OAc})_3\text{BH}$  (790 mg, 3.00 mmol, 3.0 equiv). The reaction mixture was warmed to room temperature and stirred overnight. The reaction mixture was transferred to a separatory funnel containing  $\text{CH}_2\text{Cl}_2$  and washed three times with saturated  $\text{NaHCO}_3$  solution. The aqueous layer was extracted three times with  $\text{CH}_2\text{Cl}_2$ . The combined organic layers were washed once with brine, dried over  $\text{Na}_2\text{SO}_4$ , and concentrated by rotary evaporation to yield the diastereomeric mixture. The crude product was purified by silica gel chromatography (carried out using a gradient method with an initial starting mobile phase consisting of 0:1  $\text{Et}_2\text{O}:\text{hexanes}$ , with a gradual increase to a ratio of 3:7 in 6% increments;  $\text{KMnO}_4$  stain) to yield 283 mg of the all-*syn* stereotriad **12a** (0.678 mmol, 68%) as a white solid.  $^1\text{H}$  NMR (500 MHz,  $\text{CDCl}_3$ )  $\delta$  7.27 (t,  $J = 7.6$  Hz, 2H), 7.21 – 7.16 (m, 3H), 5.48 (d,  $J = 10.7$  Hz, 1H), 4.59 (t,  $J = 12.5$  Hz, 1H), 4.43 (ddt,  $J = 48.3, 9.1, 3.3$  Hz, 1H), 4.17 (m, 1H), 4.10 (dt,  $J = 12.8, 2.8$  Hz, 1H), 3.34 (ddd,  $J = 23.7, 10.6, 2.6$  Hz, 1H), 2.79 (ddd,  $J = 14.0, 9.1, 5.1$  Hz, 1H), 2.74 – 2.64 (m, 1H), 2.19 (ttt,  $J = 13.7, 9.1, 5.0$  Hz, 1H), 2.11 – 2.02 (m, 1H), 1.93 – 1.75 (m, 2H), 0.89 (s, 9H), 0.06 (s, 3H), 0.05 (s,

3H).  $^{13}\text{C}$  NMR (126 MHz,  $\text{CDCl}_3$ )  $\delta$  140.7, 128.6, 128.5, 126.2, 93.1 (d,  $J = 179.6$  Hz), 69.1, 64.3, 58.0 (d,  $J = 17.7$  Hz), 37.2, 33.9 (d,  $J = 21.2$  Hz), 30.8 (d,  $J = 5.1$  Hz), 25.8, 17.9, -4.4, -5.1 (d,  $J = 2.7$  Hz).  $^{19}\text{F}$  NMR (471 MHz,  $\text{CDCl}_3$ )  $\delta$  -195.08 (dddd,  $J = 46.8, 33.2, 24.1, 12.8$  Hz). HRMS (ESI)  $m/z$  calculated for  $\text{C}_{19}\text{H}_{32}\text{FNO}_4\text{SSi}$   $[\text{M}+\text{H}]^+$  418.1878, found 418.1873.

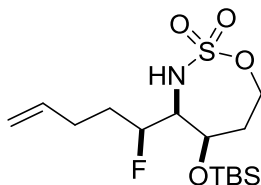

**Compound 13a.** To a flame-dried, round bottom flask equipped with a stir bar was added the enesulfamate **13** (48.9 mg, 0.141 mmol, 1.0 equiv), Selectfluor (78.0 mg, 0.220 mmol, 1.6 equiv), and 4 Å MS (80.0 mg). Dry  $\text{CH}_3\text{NO}_2$  (1.5 mL) was added to prepare a 0.1 M solution. The mixture was stirred at 80 °C for 1 hour. The reaction mixture was then filtered through a pad of celite, and the filtrate concentrated by rotary evaporation. A 1.5 mL portion of dry  $\text{CH}_3\text{CN}$  ( $\text{CH}_3\text{CN}:\text{CH}_3\text{NO}_2 = 1:1$  v/v) was added to the crude imine and the reaction mixture was cooled to 0 °C. A 1.5 mL portion of glacial AcOH ( $\text{AcOH}:\text{CH}_3\text{CN} = 1:1$  v/v) was added to the flask, followed by addition of  $\text{Me}_4\text{N}(\text{OAc})_3\text{BH}$  (119 mg, 0.453 mmol, 3.2 equiv). The reaction mixture was warmed to room temperature and stirred overnight. The reaction mixture was transferred to a separatory funnel containing  $\text{CH}_2\text{Cl}_2$  and washed three times with saturated  $\text{NaHCO}_3$  solution. The aqueous layer was extracted three times with  $\text{CH}_2\text{Cl}_2$ . The combined organic layers were washed once with brine, dried over  $\text{Na}_2\text{SO}_4$ , and concentrated by rotary evaporation to yield the diastereomeric mixture. The crude product was purified by silica gel chromatography (carried out using a gradient method with an initial starting mobile phase consisting of 0:1  $\text{CH}_2\text{Cl}_2$ :hexanes, with a gradual increase to a ratio of 7:3 in 10% increments; 1%  $\text{Et}_2\text{O}$  was added

to improve separation among diastereomers; KMnO<sub>4</sub> stain) to yield 29.8 mg of the all-*syn* stereotriad **13a** (0.0811 mmol, 58%) as a white solid. <sup>1</sup>H NMR (500 MHz, CDCl<sub>3</sub>) δ 5.79 (ddt, *J* = 17.0, 10.0, 6.7 Hz, 1H), 5.45 (d, *J* = 10.7 Hz, 1H), 5.07 (dd, *J* = 17.2, 1.8 Hz, 1H), 5.02 (d, *J* = 10.2 Hz, 1H), 4.63 (t, *J* = 12.5 Hz, 1H), 4.58 – 4.40 (m, 1H), 4.24 (t, *J* = 2.8 Hz, 1H), 4.16 (dt, *J* = 13.0, 3.3 Hz, 1H), 3.36 (ddd, *J* = 24.4, 10.7, 2.6 Hz, 1H), 2.28 – 2.08 (m, 3H), 1.99 (ttd, *J* = 14.3, 8.6, 5.9 Hz, 1H), 1.86 (dt, *J* = 15.5, 3.7 Hz, 1H), 1.76 – 1.61 (m, 1H), 0.91 (s, 9H), 0.10 (s, 3H), 0.09 (s, 3H). <sup>13</sup>C NMR (126 MHz, CDCl<sub>3</sub>) δ 137.1, 116.0, 93.7 (d, *J* = 179.6 Hz), 69.4, 64.3, 58.0 (d, *J* = 18.0 Hz), 37.5, 31.4 (d, *J* = 21.3 Hz), 29.0 (d, *J* = 5.3 Hz), 25.9, 18.1, -4.2, -4.9 (d, *J* = 2.9 Hz). <sup>19</sup>F NMR (471 MHz, CDCl<sub>3</sub>) δ -194.62 (dddd, *J* = 46.7, 31.8, 24.1, 13.3 Hz). HRMS (ESI) *m/z* calculated for C<sub>15</sub>H<sub>30</sub>FNO<sub>4</sub>SSi [M-H]<sup>-</sup> 366.1576, found 366.1575.

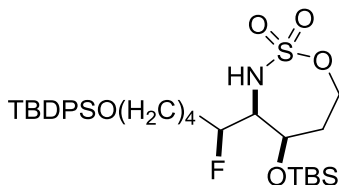

**Compound 14a.** To a flame-dried, round bottom flask equipped with a stir bar was added the enesulfamate **14** (78.6 mg, 0.130 mmol, 1.0 equiv), Selectfluor (69.7 mg, 0.197 mmol, 1.5 equiv), and 4 Å MS (69.5 mg). Dry CH<sub>3</sub>NO<sub>2</sub> (1.3 mL) was added to prepare a 0.1 M solution. The mixture was stirred at 80 °C for 1.5 hour. The reaction mixture was filtered through a pad of celite and the filtrate concentrated by rotary evaporation. A 1.3 mL portion of dry CH<sub>3</sub>CN (CH<sub>3</sub>CN:CH<sub>3</sub>NO<sub>2</sub> = 1:1 v/v) was added to the crude imine and the reaction mixture was cooled to 0 °C. A 1.3 mL portion of glacial AcOH (AcOH:CH<sub>3</sub>CN = 1:1 v/v) was added to the flask, followed by addition of Me<sub>4</sub>N(OAc)<sub>3</sub>BH (105 mg, 0.403 mmol, 3.1 equiv). The reaction mixture was warmed up to room temperature and stirred for 15 hours. The reaction mixture was then

transferred to a separatory funnel containing CH<sub>2</sub>Cl<sub>2</sub> and washed three times with saturated NaHCO<sub>3</sub> solution. The aqueous layer was extracted three times with CH<sub>2</sub>Cl<sub>2</sub>. The combined organic layers were washed once with brine, dried over Na<sub>2</sub>SO<sub>4</sub>, and concentrated by rotary evaporation to yield the diastereomeric mixture. The crude product was purified by silica gel chromatography (carried out using a gradient method with an initial starting mobile phase consisting of 0:1 CH<sub>2</sub>Cl<sub>2</sub>:hexanes, with a gradual increase to a ratio of 2:3 in 8% increments; 1% Et<sub>2</sub>O was added to improve separation among diastereomers; KMnO<sub>4</sub> stain) to yield 54.4 mg of the all-*syn* stereotriad **14a** (0.0892 mmol, 69%) as a white solid. <sup>1</sup>H NMR (500 MHz, CDCl<sub>3</sub>) δ 7.69 – 7.64 (m, 4H), 7.45 – 7.36 (m, 6H), 5.43 (d, *J* = 10.8 Hz, 1H), 4.63 (t, *J* = 12.4 Hz, 1H), 4.44 (ddt, *J* = 47.8, 8.9, 3.3 Hz, 1H), 4.25 – 4.20 (m, 1H), 4.15 (dt, *J* = 13.0, 3.3 Hz, 1H), 3.67 (t, *J* = 6.0 Hz, 2H), 3.33 (ddd, *J* = 23.9, 10.8, 2.7 Hz, 1H), 2.11 (ddt, *J* = 14.9, 12.1, 2.7 Hz, 1H), 1.90 – 1.80 (m, 2H), 1.65 – 1.50 (m, 4H), 1.50 – 1.40 (m, 1H), 1.05 (s, 9H), 0.91 (s, 9H), 0.10 (s, 6H). <sup>13</sup>C NMR (126 MHz, CDCl<sub>3</sub>) δ 135.5, 134.1, 134.1, 129.5, 127.6, 94.2 (d, *J* = 179.5 Hz), 69.2, 64.3, 63.7, 57.9 (d, *J* = 18.1 Hz), 37.3, 32.1, 31.7 (d, *J* = 21.1 Hz), 26.9, 25.8, 21.2 (d, *J* = 4.9 Hz), 19.2, 17.9, -4.4, -5.0 (d, *J* = 2.8 Hz). <sup>19</sup>F NMR (471 MHz, CDCl<sub>3</sub>) δ -193.44 – -193.75 (m). HRMS (ESI) *m/z* calculated for C<sub>31</sub>H<sub>50</sub>FNO<sub>5</sub>SSi<sub>2</sub> [M+NH<sub>4</sub>]<sup>+</sup> 641.3271, found 641.3270.

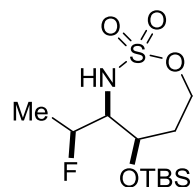

**Compound 15a.** To a flame-dried, round bottom flask equipped with a stir bar was added the enesulfamate **15** (102 mg, 0.325 mmol, 1.0 equiv), Selectfluor (177 mg, 0.498 mmol, 1.5 equiv), and 4 Å MS (177 mg). Dry CH<sub>3</sub>NO<sub>2</sub> (3.3 mL) was added to prepare a 0.1 M solution. The

mixture was stirred at 80 °C for 1 hour. The reaction mixture was then filtered through a pad of celite, and the filtrate concentrated by rotary evaporation. 3.3 mL of dry CH<sub>3</sub>CN (CH<sub>3</sub>CN:CH<sub>3</sub>NO<sub>2</sub> = 1:1 v/v) was added to the crude imine, and the reaction mixture was cooled to 0 °C. A 3.3 mL portion of glacial AcOH (AcOH:CH<sub>3</sub>CN = 1:1 v/v) was added to the flask, followed by addition of Me<sub>4</sub>N(OAc)<sub>3</sub>BH (266 mg, 1.01 mmol, 3.1 equiv). The reaction mixture was warmed up to room temperature and stirred for 4.5 hours. The reaction mixture was then transferred to a separatory funnel containing CH<sub>2</sub>Cl<sub>2</sub> and washed three times with saturated NaHCO<sub>3</sub> solution. The aqueous layer was extracted three times with CH<sub>2</sub>Cl<sub>2</sub>. The combined organic layers were washed once with brine, dried over Na<sub>2</sub>SO<sub>4</sub>, and concentrated by rotary evaporation to yield the diastereomeric mixture. The crude product was purified by silica gel chromatography (carried out using a gradient method with an initial starting mobile phase consisting of 0:1 CH<sub>2</sub>Cl<sub>2</sub>:hexanes, with a gradual increase to a ratio of 2:3 in 8% increments; 1% Et<sub>2</sub>O was added to improve separation among diastereomers; KMnO<sub>4</sub> stain) to yield 73.9 mg of the all-*syn* stereotriad **15a** (0.226 mmol, 69%) as a white solid. <sup>1</sup>H NMR (500 MHz, CDCl<sub>3</sub>) δ 5.44 (d, *J* = 10.7 Hz, 1H), 4.66 (dq, *J* = 47.6, 6.3, 3.0 Hz, 1H), 4.64 (t, 1H), 4.25 (dd, *J* = 3.5, 2.4 Hz, 1H), 4.16 (dt, *J* = 13.0, 3.3 Hz, 1H), 3.31 (ddd, *J* = 22.9, 10.8, 3.0 Hz, 1H), 2.13 (ddt, *J* = 15.4, 12.1, 2.8 Hz, 1H), 1.86 (dt, *J* = 15.6, 3.7 Hz, 1H), 1.43 (dd, *J* = 23.9, 6.3 Hz, 3H), 0.91 (s, 9H), 0.10 (s, 3H), 0.10 (s, 3H). <sup>13</sup>C NMR (126 MHz, CDCl<sub>3</sub>) δ 90.9 (d, *J* = 176.8 Hz), 69.3 (d, *J* = 1.6 Hz), 64.5, 59.4 (d, *J* = 18.1 Hz), 37.7, 26.1, 18.5 (d, *J* = 23.0 Hz), 18.3, -4.0, -4.8 (d, *J* = 2.7 Hz). <sup>19</sup>F NMR (471 MHz, CDCl<sub>3</sub>) δ -186.11 (dp, *J* = 47.4, 23.7 Hz). HRMS (ESI) *m/z* calculated for C<sub>12</sub>H<sub>26</sub>FNO<sub>4</sub>SSi [M+H]<sup>+</sup> 328.1409, found 328.1405.

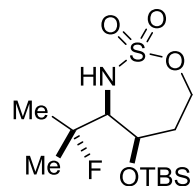

**Compound 16a.** To a flame-dried, round bottom flask equipped with a stir bar was added the enesulfamate **16** (34.3 mg, 0.107 mmol, 1.0 equiv), Selectfluor (57.4 mg, 0.162 mmol, 1.5 equiv), and 4 Å MS (56.0 mg). Dry CH<sub>3</sub>NO<sub>2</sub> (1 mL) was added to prepare a 0.1 M solution. The mixture was stirred at 80 °C for 1 hour. The reaction mixture was then filtered through a pad of celite, and the filtrate concentrated by rotary evaporation. A 1 mL portion of dry CH<sub>3</sub>CN (CH<sub>3</sub>CN:CH<sub>3</sub>NO<sub>2</sub> = 1:1 v/v) was added to the crude imine and the reaction mixture cooled to 0 °C. A 1 mL portion of glacial AcOH (AcOH:CH<sub>3</sub>CN = 1:1 v/v) was added to the flask, followed by addition of Me<sub>4</sub>N(OAc)<sub>3</sub>BH (266 mg, 1.01 mmol, 3.1 equiv). The reaction mixture was warmed to room temperature and stirred for 7 hours. The reaction mixture was transferred to a separatory funnel containing CH<sub>2</sub>Cl<sub>2</sub> and washed three times with saturated NaHCO<sub>3</sub> solution. The aqueous layer was extracted three times with CH<sub>2</sub>Cl<sub>2</sub>. The combined organic layers were washed once with brine, dried over Na<sub>2</sub>SO<sub>4</sub>, and concentrated by rotary evaporation to yield the diastereomeric mixture. The crude product was purified by silica gel chromatography (carried out using a gradient method with an initial starting mobile phase consisting of 0:1 CH<sub>2</sub>Cl<sub>2</sub>:hexanes, with a gradual increase to a ratio of 1:4 in 4% increments; 1% Et<sub>2</sub>O was added to improve separation among diastereomers; KMnO<sub>4</sub> stain) to yield 20.3 mg **16a** (0.059 mmol, 56%) as a white solid. <sup>1</sup>H NMR (500 MHz, CDCl<sub>3</sub>) δ 5.56 (d, *J* = 10.6 Hz, 1H), 4.62 (t, *J* = 12.6 Hz, 1H), 4.58 – 4.54 (m, 1H), 4.17 (dt, *J* = 13.0, 3.2 Hz, 1H), 3.29 (dd, *J* = 14.0, 10.6 Hz, 1H), 2.08 (ddt, *J* = 15.0, 12.1, 2.6 Hz, 1H), 1.90 (dt, *J* = 15.6, 3.8 Hz, 1H), 1.46 (d, *J* = 21.5 Hz, 3H), 1.40 (d, *J* = 21.7 Hz, 3H), 0.92 (s, 9H), 0.14 (s, 3H), 0.12 (s, 3H). <sup>13</sup>C NMR (126 MHz, CDCl<sub>3</sub>) δ

95.4 (d,  $J = 173.4$  Hz), 65.5 (d,  $J = 2.9$  Hz), 64.4, 61.9 (d,  $J = 26.6$  Hz), 37.5, 26.1, 26.0 (d,  $J = 23.5$  Hz), 23.7 (d,  $J = 24.3$  Hz), 18.2, -3.5, -4.5 (d,  $J = 1.7$  Hz).  $^{19}\text{F}$  NMR (471 MHz,  $\text{CDCl}_3$ )  $\delta$  -148.5 – -148.9 (m). HRMS (ESI)  $m/z$  calculated for  $\text{C}_{13}\text{H}_{28}\text{FNO}_4\text{SSi}$   $[\text{M}+\text{NH}_4]^+$  359.1831, found 359.1829.

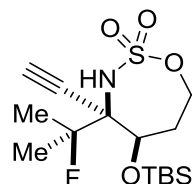

**Compound 16b.** The enesulfamate **16** (0.150 g, 0.467 mmol, 1.0 equiv) was added to a 10 mL round bottom flask, followed by addition of Selectfluor (0.252 g, 0.711 mmol, 1.5 equiv) and 0.261 g 4 Å MS. Distilled  $\text{CH}_3\text{NO}_2$  (4.7 mL) was added to make a 0.1 M solution. The reaction was stirred at 80 °C for 1.5 hour. After 1.5 hour, dry  $\text{CH}_2\text{Cl}_2$  (40 mL) was added to the reaction until no more white precipitates crashed out. The reaction mixture was filtered through a pad of celite and concentrated by rotary evaporation to yield the imine. A 0.5 M solution of ethynyl magnesium bromide in THF (3.0 mL, 1.50 mmol, 3.2 equiv) was cooled at 0 °C for at least 15 minutes before use. Dry THF (0.9 mL) was added to the imine to make a 0.5 M solution. The imine solution was then transferred to the cooled ethynyl magnesium bromide. Another 2.1 mL of THF was used to ensure quantitative transfer. The reaction was stirred at 0 °C for 60 minutes. The reaction was quenched by addition of saturated  $\text{NH}_4\text{Cl}$  solution. The mixture was transferred to a separatory funnel, and the organic layer was extracted three times with EtOAc and washed once with saturated  $\text{NH}_4\text{Cl}$  solution and once with brine, then dried over  $\text{Na}_2\text{SO}_4$  and concentrated by rotary evaporation to yield the diastereomeric mixture. The product was purified by column chromatography (carried out using a gradient method with an initial starting mobile phase consisting of 0:1  $\text{CH}_2\text{Cl}_2$ :hexanes, with a gradual increase to a ratio of 7:3 in 14%

increments; KMnO<sub>4</sub> stain) to give **16b** as the major diastereomer (0.0891g, 0.244 mmol, 52%), as a white solid. <sup>1</sup>H NMR (500 MHz, CDCl<sub>3</sub>) δ 5.62 (bs, 1H), 4.71 (t, *J* = 12.5 Hz, 1H), 4.54 (dd, *J* = 4.6, 1.7 Hz, 1H), 4.16 (dt, *J* = 12.9, 3.2 Hz, 1H), 2.82 (dddd, *J* = 15.6, 12.1, 2.9, 1.8 Hz, 1H), 2.77 (s, 1H), 1.78 (dt, *J* = 15.9, 4.1 Hz, 1H), 1.65 (d, *J* = 22.0 Hz, 3H), 1.57 (d, *J* = 20.7 Hz, 3H), 0.91 (s, 9H), 0.13 (d, *J* = 1.2 Hz, 3H), 0.11 (s, 3H). <sup>13</sup>C NMR (126 MHz, CDCl<sub>3</sub>) δ 99.2 (d, *J* = 186.8 Hz), 80.8 (d, *J* = 2.1 Hz), 77.5 (d, *J* = 8.0 Hz), 70.8, 64.0, 62.6 (d, *J* = 21.6 Hz), 34.8, 25.9 (d, *J* = 1.2 Hz), 24.8 (d, *J* = 24.1 Hz), 23.0 (d, *J* = 23.7 Hz), 18.2, -3.6, -4.3 (d, *J* = 2.4 Hz). <sup>19</sup>F NMR (471 MHz, CDCl<sub>3</sub>) δ -152.30 (hept, *J* = 21.0 Hz). HRMS (ESI) *m/z* calculated for C<sub>15</sub>H<sub>28</sub>FNO<sub>4</sub>SSi [M+Na]<sup>+</sup> 388.1385, found 388.1382.

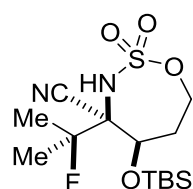

**Compound 16c.** The enesulfamate **16** (31.7 mg, 0.0986 mmol, 1.0 equiv) was added to a 10 mL round bottom flask, followed by addition of Selectfluor (62.3 mg, 0.176 mmol, 1.8 equiv) and 4 Å MS (58.7 mg). Dry CH<sub>3</sub>CN (1.0 mL) was added to make a 0.1 M solution and the reaction mixture was stirred at 40 °C for 1 day. After 1 day, Bu<sub>4</sub>NCN (84.0 mg, 0.313 mmol, 3.2 equiv) was added to the reaction mixture. The color of the solution turned reddish-brown upon addition of Bu<sub>4</sub>NCN. The reaction was stirred at room temperature for 3 hours. The mixture was transferred to a separatory funnel and CH<sub>2</sub>Cl<sub>2</sub> added to dilute the reaction mixture, followed by the addition of an equal volume of water. The aqueous layer was extracted three times with CH<sub>2</sub>Cl<sub>2</sub>, the combined organic layers were washed once with brine, dried over Na<sub>2</sub>SO<sub>4</sub> and concentrated by rotary evaporation to yield the product as a mixture of diastereomers. The



product was purified by column chromatography (carried out using a gradient method with an initial starting mobile phase consisting of 0:1 CH<sub>2</sub>Cl<sub>2</sub>:hexanes, with a gradual increased to a ratio of 7:3 in 14% increments; KMnO<sub>4</sub> stain) to give **16c** as the major diastereomer (32.2 mg, 0.0879 mmol, 89%) as a white solid. <sup>1</sup>H NMR (400 MHz, CDCl<sub>3</sub>) δ 5.65 (bs, 1H), 4.78 – 4.66 (m, 2H), 4.28 (dt, *J* = 13.0, 3.3 Hz, 1H), 2.72 (ddt, *J* = 16.5, 11.8, 2.5 Hz, 1H), 1.97 (dt, *J* = 15.7, 4.0 Hz, 1H), 1.69 (d, *J* = 21.9 Hz, 3H), 1.66 (d, *J* = 20.7 Hz, 3H), 0.92 (s, 9H), 0.17 – 0.13 (m, 6H). <sup>13</sup>C NMR (101 MHz, CDCl<sub>3</sub>) δ 114.9 (d, *J* = 7.1 Hz), 97.8 (d, *J* = 189.8 Hz), 69.4, 64.2, 62.7 (d, *J* = 24.0 Hz), 35.3, 25.9 (d, *J* = 1.0 Hz), 24.6 (d, *J* = 23.8 Hz), 23.4 (d, *J* = 23.5 Hz), 18.1, -3.6, -4.4 (d, *J* = 2.3 Hz). <sup>19</sup>F NMR (376 MHz, CDCl<sub>3</sub>) δ -151.62 (dt, *J* = 40.3, 18.7 Hz). HRMS (ESI) *m/z* calculated for C<sub>14</sub>H<sub>27</sub>FN<sub>2</sub>O<sub>4</sub>SSi [M+NH<sub>4</sub>]<sup>+</sup> 384.1783, found 384.1784.

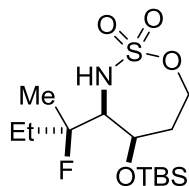

**Compound 17a.** To a flame-dried, round bottom flask equipped with a stir bar was added the enesulfamate **17** (0.131 g, 0.391 mmol, 1.0 equiv), followed by the addition of Selectfluor (0.214 g, 0.605 mmol, 1.5 equiv) and 4 Å MS (0.202 g). Dry CH<sub>3</sub>CN (3.9 mL) was added to prepare a 0.1 M solution. The mixture was stirred at 40 °C for 1 day. The reaction mixture was then filtered through a pad of celite, and the filtrate concentrated by rotary evaporation. A 3.9 mL portion of dry CH<sub>3</sub>CN was added to the crude imine and the reaction mixture was cooled to 0 °C. A 3.9 mL portion of glacial AcOH (AcOH:CH<sub>3</sub>CN = 1:1 v/v) was added to the flask, followed by addition of Me<sub>4</sub>N(OAc)<sub>3</sub>BH (0.303 g, 1.15 mmol, 2.9 equiv). The reaction mixture was warmed to room temperature and stirred for 2.75 hours. The reaction mixture was transferred to a separatory funnel containing CH<sub>2</sub>Cl<sub>2</sub> and washed three times with saturated NaHCO<sub>3</sub> solution. The aqueous

layer was extracted three times with CH<sub>2</sub>Cl<sub>2</sub>. The combined organic layers were washed once with brine, dried over Na<sub>2</sub>SO<sub>4</sub> and concentrated by rotary evaporation to yield the diastereomeric product mixture. The crude product was purified by silica gel chromatography (carried out using a gradient method with an initial starting mobile phase consisting of 0:1 CH<sub>2</sub>Cl<sub>2</sub>:hexanes, with a gradual increase to a ratio of 3:1 in 15% increments; KMnO<sub>4</sub> stain) to furnish 37.7 mg **17a** (0.106 mmol, 27%) as a white solid. <sup>1</sup>H NMR (500 MHz, CDCl<sub>3</sub>) δ 5.55 (d, *J* = 10.6 Hz, 1H), 4.63 (t, *J* = 12.5 Hz, 1H), 4.54 (dd, *J* = 4.2, 2.1 Hz, 1H), 4.16 (dt, *J* = 12.9, 3.3 Hz, 1H), 3.29 (dd, *J* = 18.6, 10.7 Hz, 1H), 2.08 (ddt, *J* = 15.4, 12.1, 2.9 Hz, 1H), 1.95 – 1.85 (m, 2H), 1.67 (ddq, *J* = 27.0, 15.1, 7.5 Hz, 1H), 1.38 (d, *J* = 21.4 Hz, 3H), 0.95 (t, *J* = 7.5 Hz, 3H), 0.91 (s, 9H), 0.12 (s, 3H), 0.11 (s, 3H). <sup>13</sup>C NMR (126 MHz, CDCl<sub>3</sub>) δ 97.5 (d, *J* = 176.8 Hz), 65.7 (d, *J* = 2.3 Hz), 64.3, 61.0 (d, *J* = 24.2 Hz), 37.6, 29.1 (d, *J* = 23.4 Hz), 26.0, 21.6 (d, *J* = 24.1 Hz), 18.2, 7.6 (d, *J* = 7.3 Hz), -3.6, -4.5 (d, *J* = 2.1 Hz). <sup>19</sup>F NMR (471 MHz, CDCl<sub>3</sub>) δ -157.99 (dpd, *J* = 31.3, 21.4, 20.7, 10.1 Hz). HRMS (ESI) *m/z* calculated for C<sub>14</sub>H<sub>30</sub>FNO<sub>4</sub>SSi [M-H]<sup>-</sup> 354.1576, found 354.1578.

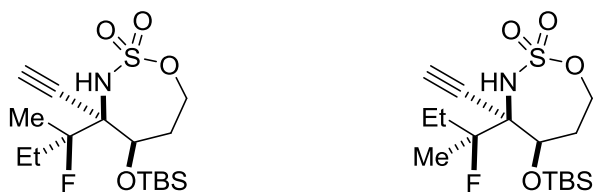

**Compound 17b.** The enesulfamate **17** (0.120 g, 0.358 mmol, 1.0 equiv) was added to a 10 mL round bottom flask, followed by addition of Selectfluor (0.194 g, 0.548 mmol, 1.5 equiv) and 4 Å MS (0.196 g). Dry CH<sub>3</sub>NO<sub>2</sub> (3.6 mL) was added to make a 0.1 M solution and the reaction mixture was stirred at 80 °C for 1.5 hour. CH<sub>2</sub>Cl<sub>2</sub> was added to the reaction until no more white precipitates crashed out. The reaction mixture was then filtered through a pad of celite and concentrated by rotary evaporation to yield the imine. A 0.5 M solution of ethynyl magnesium

bromide solution in THF (3.2 mL, 1.60 mmol, 4.5 equiv) was cooled at 0 °C for at least 15 minutes before use. Dry THF (0.7 mL) was added to the imine to make a 0.5 M solution. The imine solution was then transferred to the cooled ethynyl magnesium bromide. Another 2.0 mL of THF was used to ensure quantitative transfer. The reaction was stirred at 0 °C for 60 minutes. The reaction was quenched by addition of saturated NH<sub>4</sub>Cl solution. The mixture was transferred to a separatory funnel, and the organic layer was extracted three times with EtOAc and washed once with brine, then dried over Na<sub>2</sub>SO<sub>4</sub> and concentrated by rotary evaporation to yield the diastereomeric mixture. The product was purified by column chromatography (carried out using a gradient method with an initial starting mobile phase consisting of 0:1 CH<sub>2</sub>Cl<sub>2</sub>:hexanes, with a gradual increase to a ratio of 17:3 in 14% increments; KMnO<sub>4</sub> stain) to give an inseparable mixture of diastereomers (38.4 mg, 0.101 mmol, 28%) with **17b** as the major diastereomer. The *dr* of the product oil is 4:1. <sup>1</sup>H NMR (500 MHz, CDCl<sub>3</sub>) δ 5.64 (bs, 0.20H), 5.59 (bs, 0.80H), 4.70 (t, *J* = 12.5 Hz, 1H), 4.56 (dd, *J* = 4.6, 1.8 Hz, 1H), 4.15 (dt, *J* = 12.9, 3.3 Hz, 1H), 2.83 (dddd, *J* = 15.8, 12.1, 2.9, 1.8 Hz, 0.92H), 2.78 (q, *J* = 1.8 Hz, 0.08H), 2.76 (s, 1H), 2.35 (dp, *J* = 14.8, 7.6 Hz, 1H), 1.93 – 1.80 (m, 1H), 1.80 – 1.74 (m, 1H), 1.57 (d, *J* = 22.1 Hz, 0.6H), 1.47 (dd, *J* = 20.9, 0.8 Hz, 2.4H), 1.05 (t, *J* = 7.4 Hz, 0.6H), 0.97 (t, *J* = 7.5 Hz, 2.4H), 0.91 (s, 7.2H), 0.90 (s, 1.8H), 0.13 (d, *J* = 1.1 Hz, 2.4H), 0.11 (s, 3H), 0.10 (s, 0.6H). <sup>13</sup>C NMR (126 MHz, CDCl<sub>3</sub>) Major diastereomer: δ 100.6 (d, *J* = 191.2 Hz), 81.1 (d, *J* = 2.1 Hz), 71.0, 64.0, 62.9 (d, *J* = 21.6 Hz), 34.7, 29.9, 28.6 (d, *J* = 22.7 Hz), 25.9 (d, *J* = 1.2 Hz), 18.7 (d, *J* = 24.1 Hz), 18.2, 7.4 (d, *J* = 6.6 Hz), -3.6, -4.3 (d, *J* = 2.4 Hz). Minor diastereomer: 101.2 (d, *J* = 189.6 Hz), 81.0 (d, *J* = 2.1 Hz), 70.5, 62.9 (d, *J* = 21.0 Hz), 34.8, 27.6 (d, *J* = 22.7 Hz), 25.9 (d, *J* = 1.1 Hz), 20.1 (d, *J* = 24.4 Hz), 18.1, 7.9 (d, *J* = 3.4 Hz), -3.7, -4.4 (d, *J* = 2.3 Hz). <sup>19</sup>F NMR (471 MHz, CDCl<sub>3</sub>) δ -

162.79 (h,  $J = 23.9$  Hz), -166.16 – -166.42 (m). HRMS (ESI)  $m/z$  calculated for  $C_{16}H_{30}FNO_4SSi$   $[M+Na]^+$  402.1541, found 402.1540.

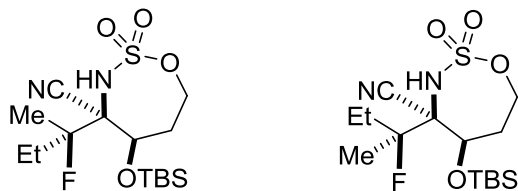

**Compound 17c.** The enesulfamate **17** (30.6 mg, 0.0913 mmol, 1.0 equiv) was added to a 10 mL round bottom flask, followed by addition of Selectfluor (50.0 mg, 0.141 mmol, 1.5 equiv) and 4 Å MS (49.7 mg). Dry  $CH_3CN$  (0.9 mL) was added to make a 0.1 M solution and the reaction mixture was stirred at 40 °C for 1 day. After 1 day,  $Bu_4NCN$  (80.0 mg, 0.298 mmol, 3.3 equiv) was added to the reaction mixture. The color of the solution turned reddish-brown upon addition of  $Bu_4NCN$ . The reaction was stirred at room temperature for 3 hours. The mixture was transferred to a separatory funnel,  $CH_2Cl_2$  was added to dilute the reaction mixture. Water (ca. 2 mL) was then added. The aqueous layer was extracted three times with  $CH_2Cl_2$ , the combined organic layers washed once with brine, then dried over  $Na_2SO_4$  and concentrated by rotary evaporation to yield the product as a mixture of diastereomers. The product was purified by column chromatography (carried out using a gradient method with an initial starting mobile phase consisting of 0:1  $CH_2Cl_2$ :hexanes, with a gradual increased to a ratio of 7:3 in 14% increments;  $KMnO_4$  stain) to give **17c** as the major diastereomer as an oil (26.0 mg, 0.0684 mmol, 75%) with a *dr* of 5:1.  $^1H$  NMR (500 MHz,  $CDCl_3$ )  $\delta$  5.66 (bs, 0.18H), 5.62 (bs, 0.82H), 4.75 – 4.66 (m, 2H), 4.27 (dt,  $J = 12.9, 3.2$  Hz, 1H), 2.78 – 2.70 (m, 1H), 2.37 (dp,  $J = 14.8, 7.4$  Hz, 1H), 1.95 (dt,  $J = 16.0, 4.0$  Hz, 1H), 1.81 (ddq,  $J = 34.6, 14.8, 7.5$  Hz, 1H), 1.63 (d,  $J = 22.0$  Hz, 0.54H), 1.57 (d,  $J = 21.0$  Hz, 2.46H), 1.10 (t,  $J = 7.4$  Hz, 0.54H), 1.03 (t,  $J = 7.5$  Hz, 2.46H),

0.92 (s, 9H), 0.16 – 0.13 (m, 6H). Major diastereomer:  $^{13}\text{C}$  NMR (126 MHz,  $\text{CDCl}_3$ )  $\delta$  114.9 (d,  $J = 7.6$  Hz), 99.5 (d,  $J = 193.7$  Hz), 69.6, 64.1, 62.9 (d,  $J = 24.1$  Hz), 35.2, 28.7 (d,  $J = 22.6$  Hz), 25.9 (d,  $J = 3.1$  Hz), 19.1 (d,  $J = 23.9$  Hz), 18.1, 7.3 (d,  $J = 6.3$  Hz), -3.6, -4.4 (d,  $J = 2.4$  Hz). Minor diastereomer:  $^{13}\text{C}$  NMR (126 MHz,  $\text{CDCl}_3$ )  $\delta$  114.9 (d,  $J = 6.8$  Hz), 99.9 (d,  $J = 192.7$  Hz), 69.2, 64.2, 62.9 (d,  $J = 24.1$  Hz), 35.3, 28.3 (d,  $J = 22.8$  Hz), 25.9, 20.1 (d,  $J = 24.0$  Hz), 7.7 (d,  $J = 3.6$  Hz), -3.6, -4.4 (d,  $J = 2.3$  Hz).  $^{19}\text{F}$  NMR (471 MHz,  $\text{CDCl}_3$ )  $\delta$  -161.50 (m), -165.00 (m). HRMS (ESI)  $m/z$  calculated for  $\text{C}_{15}\text{H}_{29}\text{FN}_2\text{O}_4\text{SSi}$   $[\text{M}-\text{H}]^-$  379.1529, found 379.1532.

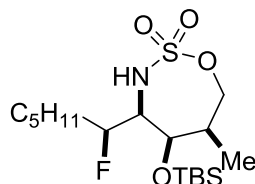

**Compound 18a.** To a flame-dried, round bottom flask equipped with a stir bar was added the enesulfamate **18** (96.2 mg, 0.255 mmol, 1.0 equiv), Selectfluor (0.148 g, 0.418 mmol, 1.6 equiv) and 4 Å MS (0.147 g). Dry  $\text{CH}_3\text{NO}_2$  (2.6 mL) was added to prepare a 0.1 M solution. The mixture was stirred at 80 °C for 1 hour. The reaction mixture was then filtered through a pad of celite, and the filtrate concentrated by rotary evaporation. A 2.6 mL portion of dry  $\text{CH}_3\text{CN}$  was added to the crude imine and the reaction mixture was cooled to 0 °C. A 2.6 mL portion of glacial AcOH ( $\text{AcOH}:\text{CH}_3\text{CN} = 1:1$  v/v) was added to the flask, followed by addition of  $\text{Me}_4\text{N}(\text{OAc})_3\text{BH}$  (0.210 g, 0.797 mmol, 3.1 equiv). The reaction mixture was warmed up to room temperature and stirred for ca. 12 hours. The reaction mixture was transferred to a separatory funnel containing  $\text{CH}_2\text{Cl}_2$  and washed three times with saturated  $\text{NaHCO}_3$  solution. The aqueous layer was extracted three times with  $\text{CH}_2\text{Cl}_2$ . The combined organic layers were washed once with brine, dried over  $\text{Na}_2\text{SO}_4$ , and concentrated by rotary evaporation to yield the

diastereomeric mixture. The crude product was purified by silica gel chromatography (carried out using a gradient method with an initial starting mobile phase consisting of 0:1 CH<sub>2</sub>Cl<sub>2</sub>:hexanes, with a gradual increase to a ratio of 2:3 in 8% increments; 1% Et<sub>2</sub>O was added to improve separation among diastereomers; KMnO<sub>4</sub> stain) to yield 52.1 mg **18a** (0.131 mmol, 51%) as a white solid. <sup>1</sup>H NMR (500 MHz, CDCl<sub>3</sub>) δ 5.37 (d, *J* = 10.6 Hz, 1H), 4.42 (dddd, *J* = 47.9, 8.4, 4.5, 2.8 Hz, 1H), 4.42 (dd, *J* = 12.7, 10.4 Hz, 1H), 4.04 – 3.97 (m, 1H), 3.81 (dd, *J* = 12.8, 1.6 Hz, 1H), 3.35 (ddd, *J* = 25.3, 10.6, 2.8 Hz, 1H), 2.17 (dqt, *J* = 9.7, 7.3, 2.3 Hz, 1H), 1.91 – 1.77 (m, 1H), 1.69 – 1.55 (m, 1H), 1.51 – 1.27 (m, 6H), 0.96 – 0.92 (m, 12H), 0.90 (t, *J* = 7.2, 3H), 0.11 (s, 3H), 0.11 (s, 3H). <sup>13</sup>C NMR (126 MHz, CDCl<sub>3</sub>) δ 94.2 (d, *J* = 179.3 Hz), 74.7 (d, *J* = 1.4 Hz), 68.7, 59.2 (d, *J* = 17.4 Hz), 41.1, 32.4 (d, *J* = 21.2 Hz), 31.6, 26.4 (d, *J* = 0.9 Hz), 24.5 (d, *J* = 5.2 Hz), 22.6, 18.7, 15.4, 14.1, -2.7, -4.2 (d, *J* = 7.1 Hz). <sup>19</sup>F NMR (471 MHz, CDCl<sub>3</sub>) δ -190.67 (dtd, *J* = 45.6, 27.7, 14.4 Hz). HRMS (ESI) *m/z* calculated for C<sub>17</sub>H<sub>36</sub>FNO<sub>4</sub>SSi [M+H]<sup>+</sup> 398.2191, found 398.2191.

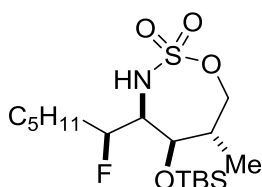

**Compound 19a.** To a flame-dried, round bottom flask equipped with a stir bar was added the corresponding enesulfamate (88.3 mg, 0.234 mmol, 1.0 equiv), Selectfluor (0.214 g, 0.605 mmol, 2.6 equiv) and 4 Å MS (0.126 g). Dry CH<sub>3</sub>NO<sub>2</sub> (2.4 mL) was added to prepare a 0.1 M solution. The mixture was stirred at 80 °C for ca. 7 hours to ensure complete consumption of the starting enesulfamate. The reaction mixture was filtered through a pad of celite and the filtrate concentrated by rotary evaporation. A 2.4 mL portion of dry CH<sub>3</sub>CN was added to the crude

imine, and the reaction mixture was cooled to 0 °C. A 2.4 mL portion of glacial AcOH (AcOH:CH<sub>3</sub>CN = 1:1 v/v) was added to the flask, followed by addition of Me<sub>4</sub>N(OAc)<sub>3</sub>BH (0.198 g, 0.751 mmol, 3.2 equiv). The reaction mixture was warmed to room temperature and stirred for 13 hours. The reaction mixture was then transferred to a separatory funnel containing CH<sub>2</sub>Cl<sub>2</sub> and washed three times with saturated NaHCO<sub>3</sub> solution. The aqueous layer was extracted three times with CH<sub>2</sub>Cl<sub>2</sub>. The combined organic layers were washed once with brine, dried over Na<sub>2</sub>SO<sub>4</sub>, and concentrated by rotary evaporation to yield the diastereomeric mixture. The crude product was purified by silica gel chromatography (carried out using a gradient method with an initial starting mobile phase consisting of 0:1 CH<sub>2</sub>Cl<sub>2</sub>:hexanes, with a gradual increase to a ratio of 3:7 in 6% increments; 1% Et<sub>2</sub>O was added to improve separation among diastereomers; KMnO<sub>4</sub> stain) to yield 22.2 mg of **19a** (0.0559 mmol, 24%) as a white solid. <sup>1</sup>H NMR (500 MHz, CDCl<sub>3</sub>) δ 5.40 (d, *J* = 10.7 Hz, 1H), 4.69 (d, *J* = 12.9 Hz, 1H), 4.41 (dddd, *J* = 48.0, 8.8, 4.2, 2.9 Hz, 1H), 3.94 (dd, *J* = 12.9, 2.7 Hz, 1H), 3.84 (d, *J* = 3.2 Hz, 1H), 3.37 (ddd, *J* = 23.8, 10.8, 2.9 Hz, 1H), 1.91 – 1.77 (m, 2H), 1.69 – 1.53 (m, 1H), 1.51 – 1.28 (m, 6H), 1.14 (d, *J* = 7.3 Hz, 3H), 0.93 – 0.87 (overlapping signals, 12H), 0.10 (d, *J* = 1.3 Hz, 3H), 0.09 (s, 3H). <sup>13</sup>C NMR (126 MHz, CDCl<sub>3</sub>) δ 94.8 (d, *J* = 179.6 Hz), 74.6 (d, *J* = 0.9 Hz), 68.2, 53.7 (d, *J* = 18.3 Hz), 40.0, 32.3 (d, *J* = 21.0 Hz), 31.6, 26.0, 24.6 (d, *J* = 4.8 Hz), 22.6, 18.1, 14.1, 13.5, -4.2, -4.9 (d, *J* = 3.0 Hz). <sup>19</sup>F NMR (471 MHz, CDCl<sub>3</sub>) δ -192.48 (dddd, *J* = 47.2, 31.5, 23.9, 14.8 Hz). HRMS (ESI) *m/z* calculated for C<sub>17</sub>H<sub>36</sub>FNO<sub>4</sub>SSi [M+H]<sup>+</sup> 398.2191, found 398.2189.

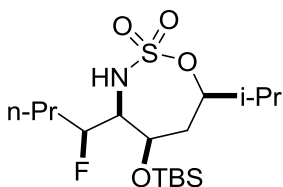

**Compound 20a.** To a flame-dried, round bottom flask equipped with a stir bar was added a portion of 90.6 mg enesulfamate **20** (0.240 mmol, 1.0 equiv), Selectfluor (0.128 g, 0.361 mmol, 1.5 equiv), and 4 Å MS (0.134 g). Dry CH<sub>3</sub>NO<sub>2</sub> (2.4 mL) was added to prepare a 0.1 M solution. The mixture was stirred at 80 °C for 1 hour. The reaction mixture was then filtered through a pad of celite, and the filtrate concentrated by rotary evaporation. A 2.4 mL portion of dry CH<sub>3</sub>CN was added to the crude imine and the reaction mixture was cooled to 0 °C. A 2.4 mL portion of glacial AcOH (AcOH:CH<sub>3</sub>CN = 1:1 v/v) was added to the flask, followed by addition of Me<sub>4</sub>N(OAc)<sub>3</sub>BH (0.191 g, 0.726 mmol, 3.0 equiv). The reaction mixture was warmed up to room temperature and stirred for 6 hours. The reaction mixture was transferred to a separatory funnel containing CH<sub>2</sub>Cl<sub>2</sub> and washed three times with saturated NaHCO<sub>3</sub> solution. The aqueous layer was extracted three times with CH<sub>2</sub>Cl<sub>2</sub>. The combined organic layers were washed once with brine, dried over Na<sub>2</sub>SO<sub>4</sub>, and concentrated by rotary evaporation to yield the diastereomeric mixture. The crude product was purified by silica gel chromatography (carried out using a gradient method with an initial starting mobile phase consisting of 0:1 CH<sub>2</sub>Cl<sub>2</sub>:hexanes, with a gradual increase to a ratio of 3:7 in 6% increments; 1% Et<sub>2</sub>O was added to improve separation among diastereomers; KMnO<sub>4</sub> stain) to yield 39.5 mg stereotriad (0.0994 mmol, 41%) as a white solid. <sup>1</sup>H NMR (500 MHz, CDCl<sub>3</sub>) δ 5.04 (d, *J* = 9.5 Hz, 1H), 4.77 (dddd, *J* = 47.2, 8.9, 4.7, 2.3 Hz, 1H), 4.39 – 4.32 (m, 2H), 3.53 (ddt, *J* = 25.3, 9.6, 2.8 Hz, 1H), 2.16 (ddd, *J* = 16.2, 10.7, 5.8 Hz, 1H), 2.03 (ddd, *J* = 15.5, 5.1, 2.8 Hz, 1H), 1.93 – 1.77(m, 2H), 1.64 – 1.34 (m, 2H), 1.00 – 0.94 (m, 9H), 0.91 (s, 9H), 0.12 (s, 3H), 0.08 (s, 3H). <sup>13</sup>C NMR (126 MHz, CDCl<sub>3</sub>) δ 92.8 (d, *J* = 177.3 Hz), 84.9, 70.8, 57.5 (d, *J* = 17.8 Hz), 39.8 (d, *J* = 1.3 Hz), 34.3 (d, *J* = 20.9 Hz), 33.1, 25.9, 18.5, 18.4 (d, *J* = 5.6 Hz), 18.1, 17.6, 13.9, -4.0, -4.9 (d, *J* = 1.5 Hz). <sup>19</sup>F NMR (471 MHz, CDCl<sub>3</sub>) δ -194.46 (dddd, *J* = 46.3, 30.9, 25.2, 13.9 Hz). HRMS (ESI) *m/z* calculated for



$C_{17}H_{36}FNO_4SSi$   $[M+NH_4]^+$  415.2457, found 415.2452. The stereochemistry of the  $i$ -Pr group on seven-membered ring was confirmed by NOE experiments:

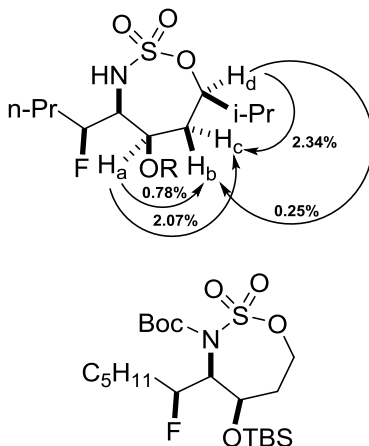

**Intermediate for the synthesis of compound 28.** A portion of 0.299 g of the stereotriad **7a** (0.779 mmol, 1.0 equiv) was dissolved in 7.5 mL dry  $CH_2Cl_2$  to prepare a 0.1 M solution. A portion of 0.27 mL  $Boc_2O$  (0.257g, 1.17 mmol, 1.5 equiv), 0.16 mL  $NEt_3$  (0.116 g, 1.17 mmol, 1.5 equiv) and 0.0117 g DMAP (0.0958 mmol, 0.1 equiv) were added to the flask and the reaction mixture stirred at room temperature for 40 minutes, diluted with  $CH_2Cl_2$  and washed twice with saturated  $NH_4Cl$  solution and once with brine. The combined organic layers were dried over  $Na_2SO_4$  and concentrated by rotary evaporation to yield the crude product, which was purified by silica gel chromatography (carried out using a gradient method with an initial starting mobile phase consisting of 0:1  $CH_2Cl_2$ :hexanes, with a gradual increase to a ratio of 1:1 in 10% increments;  $KMnO_4$  stain) to yield 36.3 mg of product as a white solid (0.750 mmol, 96%).  $^1H$  NMR (500 MHz,  $CDCl_3$ )  $\delta$  5.06 (dddd,  $J = 48.7, 10.1, 7.3, 3.2$  Hz, 1H), 4.66 – 4.53 (m, 2H), 4.47 (ddd,  $J = 12.5, 4.5, 2.2$  Hz, 1H), 4.03 (dq,  $J = 11.2, 3.5$  Hz, 1H), 2.33 – 2.20 (m, 1H), 1.89 – 1.63 (m, 3H), 1.55 (s, 9H), 1.44 – 1.27 (m, 6H), 0.92 – 0.87 (m, 12H), 0.15 (s, 3H), 0.10 (s, 3H).  $^{13}C$  NMR (126 MHz,  $CDCl_3$ )  $\delta$  151.9, 90.7 (d,  $J = 175.8$  Hz), 85.7, 72.2 (d,  $J = 4.4$  Hz), 69.7,

64.8 (d,  $J = 18.7$  Hz), 33.7, 33.1 (d,  $J = 20.6$  Hz), 31.7, 28.0, 25.8, 25.0 (d,  $J = 3.8$  Hz), 22.7, 18.0, 14.1, -4.7, -5.0.  $^{19}\text{F}$  NMR (471 MHz,  $\text{CDCl}_3$ )  $\delta$  -184.27 – -184.72 (m). HRMS (ESI)  $m/z$  calculated for  $\text{C}_{21}\text{H}_{42}\text{FNO}_6\text{SSi}$   $[\text{M}+\text{NH}_4]^+$  501.2824, found 501.2826.

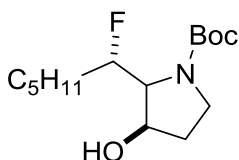

**Compound 28.** The N-Boc protected stereotriad was converted to the crude pyrrolidine product according to a published procedure<sup>4</sup>. A 51.0 mg (0.105 mmol, 1.0 equiv) portion of the triad was dissolved in 0.52 mL of DMF, followed by addition of 28.0 mg NaI (0.187 mmol, 1.8 equiv). The solution was warmed to 50 °C and stirred at the same temperature for 15 minutes prior to the addition of NaH (16.6 mg, 0.692 mmol, 6.6 equiv). Upon addition of NaH, the solution turned light yellow. The reaction mixture was then warmed to 68 °C and stirred at the same temperature for 10.5 hours. The reaction mixture was then cooled down to room temperature and cautiously quenched with H<sub>2</sub>O. The mixture was extracted with Et<sub>2</sub>O three times. The combined organics were washed once with brine and dried with MgSO<sub>4</sub>. The mixture was filtered and concentrated *in vacuo*. The crude pyrrolidine was purified by silica gel chromatography (carried out using a gradient method with an initial starting mobile phase consisting of 0:1 EtOAc:hexanes, with a gradual increase to a ratio of 2:3 in 7% increments; KMnO<sub>4</sub> stain) to yield 22.8 mg (0.0788 mmol, 75%) of **28** as a clear oil.  $^1\text{H}$  NMR (500 MHz, Tol-d<sub>8</sub>, 368K)  $\delta$  4.81 (dddd,  $J = 47.4, 9.2, 4.1, 2.3$  Hz, 1H), 3.92 (q,  $J = 8.2$  Hz, 1H), 3.81 (ddd,  $J = 29.3, 7.5, 2.3$  Hz, 1H), 3.30 (t,  $J = 7.3$  Hz, 2H), 1.90 – 1.78 (m, 1H), 1.78 – 1.60 (m, 3H), 1.53 – 1.36 (m, 11H), 1.32 – 1.20 (m, 5H), 0.86 (t,  $J = 6.9$  Hz, 3H).  $^{13}\text{C}$  NMR (126 MHz, Tol-d<sub>8</sub>, 368K)  $\delta$  154.6, 93.0 (d,  $J = 172.6$  Hz), 78.7, 71.2, 60.4 (d,  $J = 17.9$  Hz), 43.8, 32.4 (d,  $J = 21.1$  Hz), 32.4 (d,  $J = 3.6$  Hz), 31.6, 28.0, 25.1 (d,  $J = 4.7$

Hz), 22.3, 13.4.  $^{19}\text{F}$  NMR (471 MHz, Tol-d<sub>8</sub>, 368K)  $\delta$  -191.36 – -193.07 (m). HRMS (ESI)  $m/z$  calculated for  $\text{C}_{15}\text{H}_{28}\text{FNO}_3$   $[\text{M}+\text{Na}]^+$  312.1945, found 312.1941.

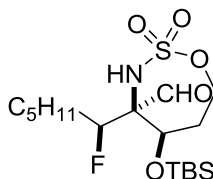

**Intermediate for the synthesis of compound 29.** A portion of 29.1 mg of the stereotriad **9a** (0.0710 mmol, 1.0 equiv) was subjected to ozonolysis conditions<sup>5</sup> to yield the crude aldehyde product. The **9a** was dissolved in dry  $\text{CH}_2\text{Cl}_2$  and cooled to  $-78\text{ }^\circ\text{C}$ . Ozone was then bubbled into the solution until a persistent blue color was observed. At this point,  $\text{N}_2$  was bubbled through the solution in place of the ozone until the blue color went away. A 0.02 mL portion of  $\text{NEt}_3$  (14.5 mg, 0.144 mmol, 2.0 equiv) was then added and the solution was warmed to room temperature and allowed to stir for 3.5 hours. After the reaction was complete as indicated by a TLC check ( $\text{CH}_2\text{Cl}_2$ :hexanes = 1:1,  $\text{KMnO}_4$  stain), the organic solution was diluted with  $\text{Et}_2\text{O}$ , washed once with saturated  $\text{NH}_4\text{Cl}$  solution. After the aqueous layer was extracted three times with  $\text{Et}_2\text{O}$ , the combined organic layers were washed with brine once and dried over  $\text{Na}_2\text{SO}_4$ . The product was purified by silica gel chromatography (carried out using a gradient method with an initial starting mobile phase consisting of 0:1  $\text{EtOAc}$ :hexanes, with a gradual increase to a ratio of 1:1 in 10% increments;  $\text{KMnO}_4$  stain) to yield 24.5 mg of the aldehyde as clear yellow oil (0.0595 mmol, 84%).  $^1\text{H}$  NMR (500 MHz,  $\text{CDCl}_3$ )  $\delta$  9.91 (d,  $J = 3.4$  Hz, 1H), 5.44 (bs, 1H), 4.80 (ddd,  $J = 46.8$ , 11.1, 2.0 Hz, 1H), 4.54 – 4.47 (m, 2H), 4.20 (ddd,  $J = 12.2$ , 6.0, 2.9 Hz, 1H), 2.19 (ddt,  $J = 16.0$ , 9.2, 2.4 Hz, 1H), 2.10 (dtd,  $J = 15.8$ , 6.5, 2.1 Hz, 1H), 1.85 – 1.71 (m, 1H), 1.61 – 1.51 (m, 1H), 1.51 – 1.26 (m, 6H), 0.91 (s, 9H), 0.88 (t,  $J = 6.7$  Hz, 3H), 0.13 – 0.10 (m, 6H).  $^{13}\text{C}$  NMR (126 MHz,  $\text{CDCl}_3$ )  $\delta$  199.2 (d,  $J = 4.8$  Hz), 94.7 (d,  $J = 185.8$  Hz), 72.1, 71.6 (d,  $J = 16.3$  Hz), 66.4,

34.4 (d,  $J = 2.2$  Hz), 31.4, 30.2 (d,  $J = 21.8$  Hz), 25.9, 25.0 (d,  $J = 3.4$  Hz), 22.5, 18.1, 14.1, -4.0, -4.9 (d,  $J = 0.71$  Hz).  $^{19}\text{F}$  NMR (471 MHz,  $\text{CDCl}_3$ )  $\delta$  -193.61 (dddd,  $J = 46.6, 42.3, 12.7, 3.4$  Hz). HRMS (ESI)  $m/z$  calculated for  $\text{C}_{17}\text{H}_{34}\text{FNO}_5\text{SSi}$   $[\text{M}+\text{NH}_4]^+$  429.2249, found 429.2250.

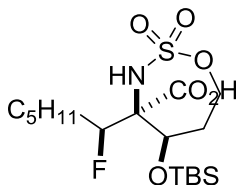

**Compound 29.** A portion of 60.2 mg (0.146 mmol, 1.0 equiv) of the aldehyde was dissolved in 0.50 mL  $\text{CH}_3\text{CN}$ . An aqueous solution of  $\text{NaH}_2\text{PO}_4$  (8.7 mg in 0.24 mL  $\text{H}_2\text{O}$ ) and 0.1 mL 30% wt%  $\text{H}_2\text{O}_2$  were added to the dissolved aldehyde and the reaction mixture was cooled to 0 °C. Next, an aqueous solution of  $\text{NaClO}_2$  (15.7 mg in 0.23 mL  $\text{H}_2\text{O}$ ) was added and the reaction mixture stirred at room temperature until starting material was consumed after 3 hours. The reaction was quenched with addition of aqueous solution of  $\text{NaHSO}_3$ . After another 30 minutes of stirring, 2 N HCl was added. The reaction mixture was extracted with  $\text{CH}_2\text{Cl}_2$  three times. The combined organic layers were then washed with 10% NaOH solution twice to ensure deprotonation of the acid. A portion of 2 N HCl was then added to the combined aqueous layers to ensure protonation of the acid. The mixture was then extracted five times with  $\text{CH}_2\text{Cl}_2$ . The combined organic layers were then washed once with brine and dried over  $\text{Na}_2\text{SO}_4$ . A 29.0 mg portion of product **30** (0.0678 mmol, 46%) was obtained as a white solid. The product was clean enough for direct characterization without further purification.  $^1\text{H}$  NMR (500 MHz,  $\text{CDCl}_3$ )  $\delta$  9.38 – 7.80 (bs, 1H), 5.40 (bs, 1H), 4.91 (dd,  $J = 47.8, 10.2$  Hz, 1H), 4.66 (d,  $J = 8.2$ , 1H), 4.47 (ddd,  $J = 11.3, 8.3, 2.6$  Hz, 1H), 4.25 (ddd,  $J = 12.1, 7.3, 2.8$  Hz, 1H), 2.34 (dtd,  $J = 15.9, 7.9, 2.5$  Hz, 1H), 2.23 (dd,  $J = 16.3, 7.6$  Hz, 1H), 1.80 – 1.67 (m, 1H), 1.66 – 1.49 (m, 2H), 1.42 – 1.21 (m, 5H), 0.92 (s, 9H), 0.89 (t,  $J = 6.8$  Hz, 3H), 0.12 (s, 3H), 0.12 (s, 3H).  $^{13}\text{C}$  NMR (126 MHz,

CDCl<sub>3</sub>)  $\delta$  171.4, 93.7 (d,  $J = 186.1$  Hz), 73.7, 69.3 (d,  $J = 15.7$  Hz), 67.2, 35.2 (d,  $J = 2.6$  Hz), 31.4, 30.6 (d,  $J = 21.3$  Hz), 25.9, 25.4 (d,  $J = 2.8$  Hz), 22.6, 18.1, 14.1, -4.1, -4.8. <sup>19</sup>F NMR (471 MHz, CDCl<sub>3</sub>)  $\delta$  -193.69 (td,  $J = 47.1, 46.6, 14.6$  Hz). HRMS (ESI)  $m/z$  calculated for C<sub>17</sub>H<sub>34</sub>FNO<sub>6</sub>SSi [M+NH<sub>4</sub>]<sup>+</sup> 445.2198, found 445.2195.

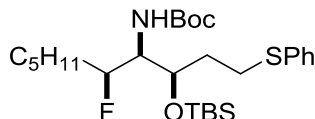

**Intermediate for the synthesis of compound 30.** The thiophenol ring-opening product was obtained using a published procedure<sup>6</sup> to convert 570 mg Boc-protected enesulfamate (1.18 mmol, 1.0 equiv) to 646 mg (quantitative yield) product as a colorless oil. To a 25 mL round-bottom flask was added the Boc-protected enesulfamate, 0.3 mL PhSH (322 mg, 2.92 mmol, 2.5 equiv), and 13 mL CH<sub>3</sub>CN, followed by addition of 332 mg K<sub>2</sub>CO<sub>3</sub> (2.40 mmol, 2.0 equiv). The reaction was monitored by TLC (CH<sub>2</sub>Cl<sub>2</sub>:hexanes = 1:1, KMnO<sub>4</sub> stain). After 2 hours, a saturated NaHCO<sub>3</sub> solution was added to the reaction mixture and the mixture extracted with EtOAc three times. The combined organic layers were washed once with saturated NaHCO<sub>3</sub> and brine, followed by drying with Na<sub>2</sub>SO<sub>4</sub>. The crude product was concentrated *in vacuo* and purified by silica gel chromatography (carried out using a gradient method with an initial starting mobile phase consisting of 0:1 CH<sub>2</sub>Cl<sub>2</sub>:hexanes, with a gradual increase to a ratio of 1:1 in 10% increments; KMnO<sub>4</sub> stain) to give the product. <sup>1</sup>H NMR (500 MHz, C<sub>6</sub>D<sub>6</sub>)  $\delta$  7.35 (dd,  $J = 8.1, 1.1$  Hz, 2H), 7.04 (t,  $J = 7.8$  Hz, 2H), 6.92 (tt,  $J = 7.3, 1.3$  Hz, 1H), 4.91 (d,  $J = 9.6$  Hz, 1H), 4.77 (dddd,  $J = 47.8, 8.5, 5.0, 1.8$  Hz, 1H), 4.11 (ddd,  $J = 7.0, 5.3, 3.8$  Hz, 1H), 3.98 (dddd,  $J = 28.2, 9.6, 3.9, 1.9$  Hz, 1H), 3.04 (dt,  $J = 13.5, 6.9$  Hz, 1H), 2.87 (dt,  $J = 12.9, 7.4$  Hz, 1H), 1.93 (q,  $J = 7.5$  Hz, 2H), 1.79 – 1.64 (m, 1H), 1.57 – 1.46 (m, 1H), 1.43 (s, 9H), 1.39 – 1.29 (m, 2H), 1.24 –

1.10 (m, 4H), 0.90 (s, 9H), 0.83 (t,  $J = 7.0$  Hz, 3H), 0.16 (s, 3H), 0.04 (s, 3H).  $^{13}\text{C}$  NMR (126 MHz,  $\text{C}_6\text{D}_6$ )  $\delta$  156.1, 137.2, 129.6, 129.2, 126.1, 92.3 (d,  $J = 172.9$  Hz), 79.4, 71.7, 56.1 (d,  $J = 16.5$  Hz), 33.0 (d,  $J = 18.2$  Hz), 32.9, 31.8, 30.3, 28.4, 26.1, 25.1 (d,  $J = 5.5$  Hz), 22.8, 18.1, 14.2, -4.4.  $^{19}\text{F}$  NMR (471 MHz,  $\text{C}_6\text{D}_6$ )  $\delta$  -192.29 (dtd,  $J = 44.5, 28.6, 14.5$  Hz). HRMS (ESI)  $m/z$  calculated for  $\text{C}_{27}\text{H}_{48}\text{FNO}_3\text{SSi}$   $[\text{M}+\text{H}]^+$  514.3181, found 514.3188.

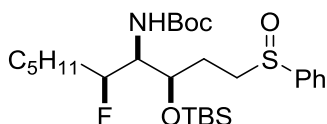

**Intermediate for the synthesis of compound 30.** A published procedure<sup>6b,7</sup> was used to convert 538 mg of the thiol ring-opening product (1.05 mmol, 1.0 equiv) to 586 mg (quantitative yield) of the sulfoxide product as colorless oil in a *dr* of 1:1. To a 5 mL round-bottom flask was added 1.19 g (12.7 mmol, 12.1 equiv) phenol and the thiol phenol ring-opening product, followed by addition of 30 % by weight  $\text{H}_2\text{O}_2$  in water (0.83 mL). After 20 minutes, the reaction was quenched by addition of saturated  $\text{Na}_2\text{S}_2\text{O}_3$  solution. The reaction mixture was then diluted with  $\text{H}_2\text{O}$  and the aqueous layer was extracted with EtOAc three times. The combined organics were then washed once with saturated  $\text{K}_2\text{CO}_3$  and once with brine. The organics were dried over  $\text{Na}_2\text{SO}_4$  and concentrated *in vacuo*. The crude product was purified by silica gel chromatography (carried out using a gradient method with an initial starting mobile phase consisting of 0:1 EtOAc:hexanes, with a gradual increase to a ratio of 1:9 in 2% increments to get remove any unreacted phenol; the ratio of the solvent was then gradually increased to 1:3 in 3% increments to afford the product;  $\text{KMnO}_4$  stain).  $^1\text{H}$  NMR (500 MHz,  $\text{C}_6\text{D}_6$ )  $\delta$  7.55 – 7.50 (m, 2H), 7.08 – 7.01 (m, 2H), 7.01 – 6.94 (m, 1H), 4.95 (dd,  $J = 30.6, 9.6$  Hz, 1H), 4.79 – 4.53 (m, overlapping signals, 1H), 4.00 – 3.83 (m, overlapping signals, 2H), 2.83 (dddd,  $J = 21.7, 13.1, 9.9, 5.6$  Hz,

1H), 2.64 (dddd,  $J = 13.0, 9.7, 5.4, 2.5$  Hz, 1H), 2.22 (ddt,  $J = 15.1, 10.3, 5.4$  Hz, 0.5H), 2.14 – 2.05 (m, 0.5H), 1.93 – 1.83 (m, 1H), 1.79 – 1.61 (m, 1H), 1.61 – 1.45 (m, 1H), 1.43 (s, 4.5H), 1.41 (s, 4.5H), 1.38 – 1.08 (m, 6H), 0.87 (s, 4.5H), 0.85 (s, 4.5H), 0.86 – 0.81 (m, overlapping signals, 3H), 0.11 (s, 1.5H), 0.10 (s, 1.5H), 0.02 (s, 1.5H), -0.05 (s, 1.5H).  $^{13}\text{C}$  NMR (126 MHz,  $\text{C}_6\text{D}_6$ )  $\delta$  156.3, 156.2, 145.7, 145.5, 130.4, 130.4, 129.2, 129.2, 124.2, 124.2, 92.8 (d,  $J = 173.2$  Hz), 92.5 (d,  $J = 173.6$  Hz), 79.5, 79.4, 72.1, 72.0, 56.1 (d,  $J = 16.7$  Hz), 56.0 (d,  $J = 17.1$  Hz), 53.1, 52.9, 32.9, 32.8, 31.9, 31.8, 28.4, 26.0, 25.1 (d,  $J = 5.2$  Hz), 25.1 (d,  $J = 5.2$  Hz), 22.8, 22.8, 18.1, 14.2, 14.2, -4.3, -4.3, -4.5, -4.6.  $^{19}\text{F}$  NMR (471 MHz,  $\text{C}_6\text{D}_6$ )  $\delta$  -192.53 (m). HRMS (ESI)  $m/z$  calculated for  $\text{C}_{27}\text{H}_{48}\text{FNO}_4\text{SSi}$   $[\text{M}+\text{H}]^+$  530.3130, found 530.3137.

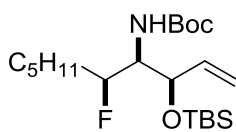

**Compound 30.** A published procedure<sup>6b,7</sup> was used to convert 20.0 mg sulfoxide (0.0377 mmol, 1.0 equiv) to 12.3 mg (0.0305 mmol, 81%) compound **31** as a white solid. To an oven-dried pressure tube was added the sulfoxide and 1.5 mL of distilled xylenes, followed by addition of 20.0 mg  $\text{NaHCO}_3$  (0.238 mmol, 6.3 equiv). The reaction mixture was heated at 130 °C until  $^1\text{H}$  NMR showed complete consumption of starting material. After 17 hours, the reaction mixture was cooled to room temperature, diluted with  $\text{H}_2\text{O}$  and the aqueous layer was extracted three times with EtOAc. The combined organic layers were washed once with brine and dried over  $\text{Na}_2\text{SO}_4$ . After concentration *in vacuo*, the crude product was purified by silica gel chromatography (carried out using a gradient method with an initial starting mobile phase consisting of 0:1  $\text{CH}_2\text{Cl}_2$ :hexanes, with a gradual increase to a ratio of 1:1 in 5% increments;

KMnO<sub>4</sub> stain). <sup>1</sup>H NMR (500 MHz, C<sub>6</sub>D<sub>6</sub>) δ 5.90 (dddd, *J* = 17.3, 10.2, 7.1, 2.9 Hz, 1H), 5.19 (dt, *J* = 17.1, 1.5 Hz, 1H), 5.01 (dt, *J* = 10.4, 1.3 Hz, 1H), 4.89 (dddd, *J* = 47.8, 7.7, 5.6, 1.4 Hz, 1H), 4.89 (d, *J* = 9.9 Hz, 1H), 4.29 (t, *J* = 6.3 Hz, 1H), 4.00 (dddd, *J* = 29.5, 9.9, 5.6, 1.5 Hz, 1H), 1.86 – 1.72 (m, 1H), 1.65 – 1.51 (m, 1H), 1.45 (s, 9H), 1.40 – 1.28 (m, 2H), 1.24 – 1.12 (m, 4H), 0.96 (s, 9H), 0.83 (t, *J* = 6.9 Hz, 3H), 0.10 (s, 3H), 0.06 (s, 3H). <sup>13</sup>C NMR (126 MHz, C<sub>6</sub>D<sub>6</sub>) δ 156.0, 138.5, 116.6, 92.1 (d, *J* = 172.3 Hz), 79.2, 74.9, 57.3 (d, *J* = 16.4 Hz), 32.7 (d, *J* = 20.9 Hz), 31.8, 28.5, 26.0, 25.1 (d, *J* = 5.9 Hz), 22.8, 18.3, 14.2, -4.3, -4.8. <sup>19</sup>F NMR (471 MHz, C<sub>6</sub>D<sub>6</sub>) δ -192.57 – -192.87 (m). HRMS (ESI) *m/z* calculated for C<sub>21</sub>H<sub>42</sub>FNO<sub>3</sub>Si [M+Na]<sup>+</sup> 426.2810, found 426.2808.

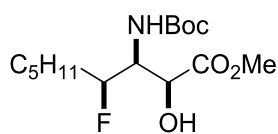

**Compound 31.** A portion of 9.9 mg of **30** (0.0245 mmol, 1.0 equiv) was dissolved in dry CH<sub>2</sub>Cl<sub>2</sub> and cooled down to -78 °C. Ozone was then bubbled into the solution until a persistent blue color was observed. At this point, the ozone addition was stopped and N<sub>2</sub> was bubbled through the solution until the blue color disappeared. A 0.05 mL portion of NEt<sub>3</sub> was then added and the solution was warmed to room temperature and allowed to stir for 1 hour. The organic solution was diluted with ether and washed once with saturated NH<sub>4</sub>Cl solution. After the aqueous layer was extracted three times with ether, the combined organic layers were washed with brine once and dried over Na<sub>2</sub>SO<sub>4</sub>. The aldehyde was used for the subsequent Pinnick oxidation without further purification. The aldehyde was dissolved in 0.40 mL CH<sub>3</sub>CN. An aqueous solution of NaH<sub>2</sub>PO<sub>4</sub> (5.2 mg in 0.1 mL H<sub>2</sub>O) and 0.1 mL 30% by weight solution of H<sub>2</sub>O<sub>2</sub> in water were added to the dissolved aldehyde. The reaction mixture was cooled to 0 °C.



An aqueous solution of NaClO<sub>2</sub> (4.8 mg in 0.1 mL H<sub>2</sub>O) was added and the solution was stirred at room temp until starting material was consumed (ca. 12 hours). The reaction was then quenched by the addition of an aqueous solution of NaHSO<sub>3</sub>. After another 30 minutes of stirring, 2 N HCl was added. The reaction mixture was extracted three times with CH<sub>2</sub>Cl<sub>2</sub>, the combined organics washed once with brine, dried over Na<sub>2</sub>SO<sub>4</sub>, and concentrated under reduced pressure. The crude carboxylic acid was dissolved in 0.34 mL MeOH at 0 °C. A solution of 0.1 mL TMSCHN<sub>2</sub> was added dropwise over 1 minute. After 30 minutes of stirring at 0 °C, 0.01 mL AcOH was added and the resulting mixture was concentrated *in vacuo*. A 4.5 mg (0.0140 mmol, 57%) portion of the product **32** was obtained as colorless oil after purification by column chromatography (carried out using a gradient method with an initial starting mobile phase consisting of 0:1 EtOAc:hexanes, with a gradual increase to a ratio of 1:4 in 3% increments; KMnO<sub>4</sub> stain). <sup>1</sup>H NMR (500 MHz, C<sub>6</sub>D<sub>6</sub>) δ 5.09 (d, *J* = 10.2 Hz, 1H), 4.60 (ddt, *J* = 48.0, 8.5, 3.8 Hz, 1H), 4.34 (ddt, *J* = 23.3, 10.2, 3.4 Hz, 1H), 4.11 (t, *J* = 3.8 Hz, 1H), 3.29 (s, 3H), 3.07 (d, *J* = 4.4 Hz, 1H), 1.70 – 1.58 (m, 1H), 1.41 (s, 9H), 1.30 – 1.03 (m, 7 H), 0.81 (t, *J* = 7.1 Hz, 3H). <sup>13</sup>C NMR (126 MHz, C<sub>6</sub>D<sub>6</sub>) δ 174.0, 155.8, 92.5 (d, *J* = 173.0 Hz), 79.6, 70.3, 55.7 (d, *J* = 19.4 Hz), 52.4, 32.0 (d, *J* = 20.8 Hz), 31.8, 28.3, 25.0 (d, *J* = 4.4 Hz), 22.8, 14.2. <sup>19</sup>F NMR (471 MHz, C<sub>6</sub>D<sub>6</sub>) δ -193.19 (dddd, *J* = 48.0, 31.9, 23.3, 15.3 Hz). HRMS (ESI) *m/z* calculated for C<sub>15</sub>H<sub>28</sub>FNO<sub>5</sub> [M+Na]<sup>+</sup> 344.1844, found 344.1840.

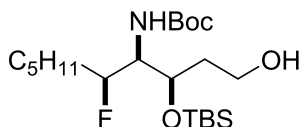

**Precursor for the synthesis of compound 32.** The reaction was repeated three times due to discrepancies in yield on the small scales employed (8.8 mg, 0.0209 mmol, 84%; 37.0 mg,

0.0879 mmol, 42%; 26.7 mg, 0.0634 mmol, 51%). The average of the three reactions was taken as the final yield, which is 59%. The amount of the starting material used for each reaction was 0.0248 mmol, 0.211 mmol, and 0.124 mmol, respectively. The procedure for the reaction carried out on a 0.124 mmol scale involved dissolving compound **31** (49.8 mmg, 0.124 mmol, 1.0 equiv) in THF (1 mL) in a flame-dried, round bottom flask to make a 0.3 M solution, which was then cooled to 0 °C. The BH<sub>3</sub>/THF complex (0.4 mL, 0.400 mmol, 0.83 equiv) was added to the same flask and the reaction mixture stirred at room temperature. After 1 day, H<sub>2</sub>O (1.85 μL, 0.0019 g, 0.106 mmol, 0.85 equiv) was added to the reaction and stirred continued for another 30 minutes before the addition of a 5 M aqueous solution of NaOH (0.1 mL, 4.2 equiv) and 30% by weight solution of H<sub>2</sub>O<sub>2</sub> in water (0.1 mL, 1.02 mmol, 8.2 equiv). The reaction was warmed to room temperature and stirred for 1 hour. A saturated K<sub>2</sub>CO<sub>3</sub> solution and H<sub>2</sub>O were added to quench the reaction and the resulting solution extracted three times with CH<sub>2</sub>Cl<sub>2</sub>. The combined organic layers were washed once with brine and dried over Na<sub>2</sub>SO<sub>4</sub>. After concentration *in vacuo*, the crude product was purified by silica gel chromatography (carried out using a gradient method with an initial starting mobile phase consisting of 0:1 EtOAc:hexanes, with a gradual increase to a ratio of 1:4 in 3% increments; KMnO<sub>4</sub> stain) to yield 26.7 mg alcohol (0.0634 mmol, 51%) as a colorless oil. <sup>1</sup>H NMR (500 MHz, C<sub>6</sub>D<sub>6</sub>) δ 5.08 (d, *J* = 9.6 Hz, 1H), 4.92 – 4.76 (m, 1H), 4.12 – 4.06 (m, 1.5H), 4.03 (ddd, *J* = 10.0, 4.1, 2.0 Hz, 0.5H), 3.61 (dt, *J* = 11.1, 5.6 Hz, 1H), 3.53 (dt, *J* = 11.0, 6.3 Hz, 1H), 1.85 – 1.67 (m, 3H), 1.66 – 1.51 (m, 1H), 1.49 – 1.33 (m, 12H), 1.26 – 1.13 (m, 4H), 0.93 (s, 9H), 0.85 (t, *J* = 6.8 Hz, 3H), 0.16 (s, 3H), 0.07 (s, 3H). <sup>13</sup>C NMR (126 MHz, C<sub>6</sub>D<sub>6</sub>) δ 156.4, 92.7 (d, *J* = 172.6 Hz), 79.4, 71.0, 59.4, 56.3 (d, *J* = 16.4 Hz), 36.4 (d, *J* = 2.5 Hz), 33.1 (d, *J* = 21.3 Hz), 31.9, 28.4, 26.1, 25.2 (d, *J* = 5.4 Hz), 22.9, 18.2, 14.2, -4.5, -4.6. <sup>19</sup>F NMR

(471 MHz, C<sub>6</sub>D<sub>6</sub>)  $\delta$  -192.57 (dtd,  $J = 48.6, 28.3, 14.6$  Hz). HRMS (ESI)  $m/z$  calculated for C<sub>21</sub>H<sub>44</sub>FNO<sub>4</sub>Si [M+H]<sup>+</sup> 422.3096, found 422.3092.

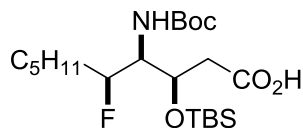

**Compound 32.** A portion of 4.0 mg RuCl<sub>3</sub>·XH<sub>2</sub>O (0.0024 mmol, 0.1 equiv) was added at 0 °C to a solution of 8.8 mg (0.0209 mmol, 1.0 equiv) alcohol and NaIO<sub>4</sub> (20.0 mg, 0.0935 mmol, 4.5 equiv) dissolved in a mixture of 0.3 mL CH<sub>3</sub>CN, 0.12 mL CCl<sub>4</sub> and 0.22 mL H<sub>2</sub>O. The reaction mixture was warmed to room temperature and stirred for 27 hours. A 1 mL portion of 1 N HCl was added to the reaction mixture and the aqueous layer extracted with EtOAc three times. The combined organics were washed once with brine, dried over Na<sub>2</sub>SO<sub>4</sub> and concentrated *in vacuo*. 7.0 mg (0.0161 mmol, 77%) compound **32** was yielded after column chromatography (carried out using a gradient method with an initial starting mobile phase consisting of 0:1 EtOAc:hexanes, with a gradual increase to a ratio of 1:4 in 5% increments; KMnO<sub>4</sub> stain) to give the product as a colorless oil. <sup>1</sup>H NMR (600 MHz, Tol-d<sub>8</sub>)  $\delta$  4.90 – 4.84 (m, 1.5H), 4.78 (dd,  $J = 7.7, 5.4$  Hz, 0.5H), 4.47 (dt,  $J = 8.2, 4.3$  Hz, 1H), 4.00 (dddd,  $J = 29.1, 9.6, 3.9, 1.6$  Hz, 1H), 2.55 (ddd,  $J = 15.9, 8.0, 2.3$  Hz, 1H), 2.46 (dd,  $J = 15.8, 4.6$  Hz, 1H), 1.78 – 1.66 (m, 1H), 1.59 – 1.47 (m, 1H), 1.42 (s, 9H), 1.38 – 1.28 (m, 3H), 1.25 – 1.14 (m, 4H), 0.92 (s, 9H), 0.86 (t,  $J = 7.1$  Hz, 3H), 0.17 (s, 3H), 0.14 (s, 3H). <sup>13</sup>C NMR (151 MHz, Tol-d<sub>8</sub>)  $\delta$  177.1, 156.0, 92.1 (d,  $J = 172.4$  Hz), 79.6, 70.3, 56.4 (d,  $J = 16.3$  Hz), 38.8 (d,  $J = 3.5$  Hz), 32.9 (d,  $J = 21.3$  Hz), 31.8, 28.3, 26.0, 25.1 (d,  $J = 5.7$  Hz), 22.9, 18.1, 14.1, -4.7, -4.8. <sup>19</sup>F NMR (564 MHz, Tol-d<sub>8</sub>)  $\delta$  -192.81 (dtd,  $J = 44.0, 28.8, 14.4$  Hz). HRMS (ESI)  $m/z$  calculated for C<sub>21</sub>H<sub>42</sub>FNO<sub>5</sub>Si [M-H]<sup>-</sup> 434.2744, found 434.2750.

## V. References.

1. W.L.F. Armarego, C.L.L. Chai, Purification of Laboratory Chemicals 6th ed., Elsevier: Burlington, MA, **2009**.
2. Still, W.C.; Kahn, M.; Mitra, S. *J. Org. Chem.* **1978**, *43*, 2923.
3. Fiori, K. W.; Espino, C. G.; Brodsky, B. H.; Du Bois, J. *Tetrahedron*, **2009**, *65*, 3042.
4. (a) Thornton, A. R.; Martin V. I.; Blakey, S. B. *J. Am. Chem. Soc.* **2009**, *131*, 2434. (b) Adams, C. S.; Grigg, R. D.; Schomaker, J. M. *Chem. Sci.* **2014**, *5*, 3046.
5. Loertscher, B. M.; Young, P. R.; Evans, P. R.; Castle, S. L. *Org. Lett.* **2013**, *15*, 1930.
6. (a) Kenworthy, M. N.; Taylor, R. *J. Org. Biomol. Chem.* **2005**, *3*, 603. (b) Gerstner, N. C.; Adams, C. S.; Grigg, R. D.; Tretbar, M.; Rigoli, J. W.; Schomaker, J. M. *Org. Lett.* **2016**, *18*, 284.
7. Xu, W. L.; Li, Y. Z.; Zhang, Q. S.; Zhu, H. S. *Synthesis* **2004**, *2*, 227.

## VI. NMR Spectra.

<sup>1</sup>H NMR for the precursor for compound 13.

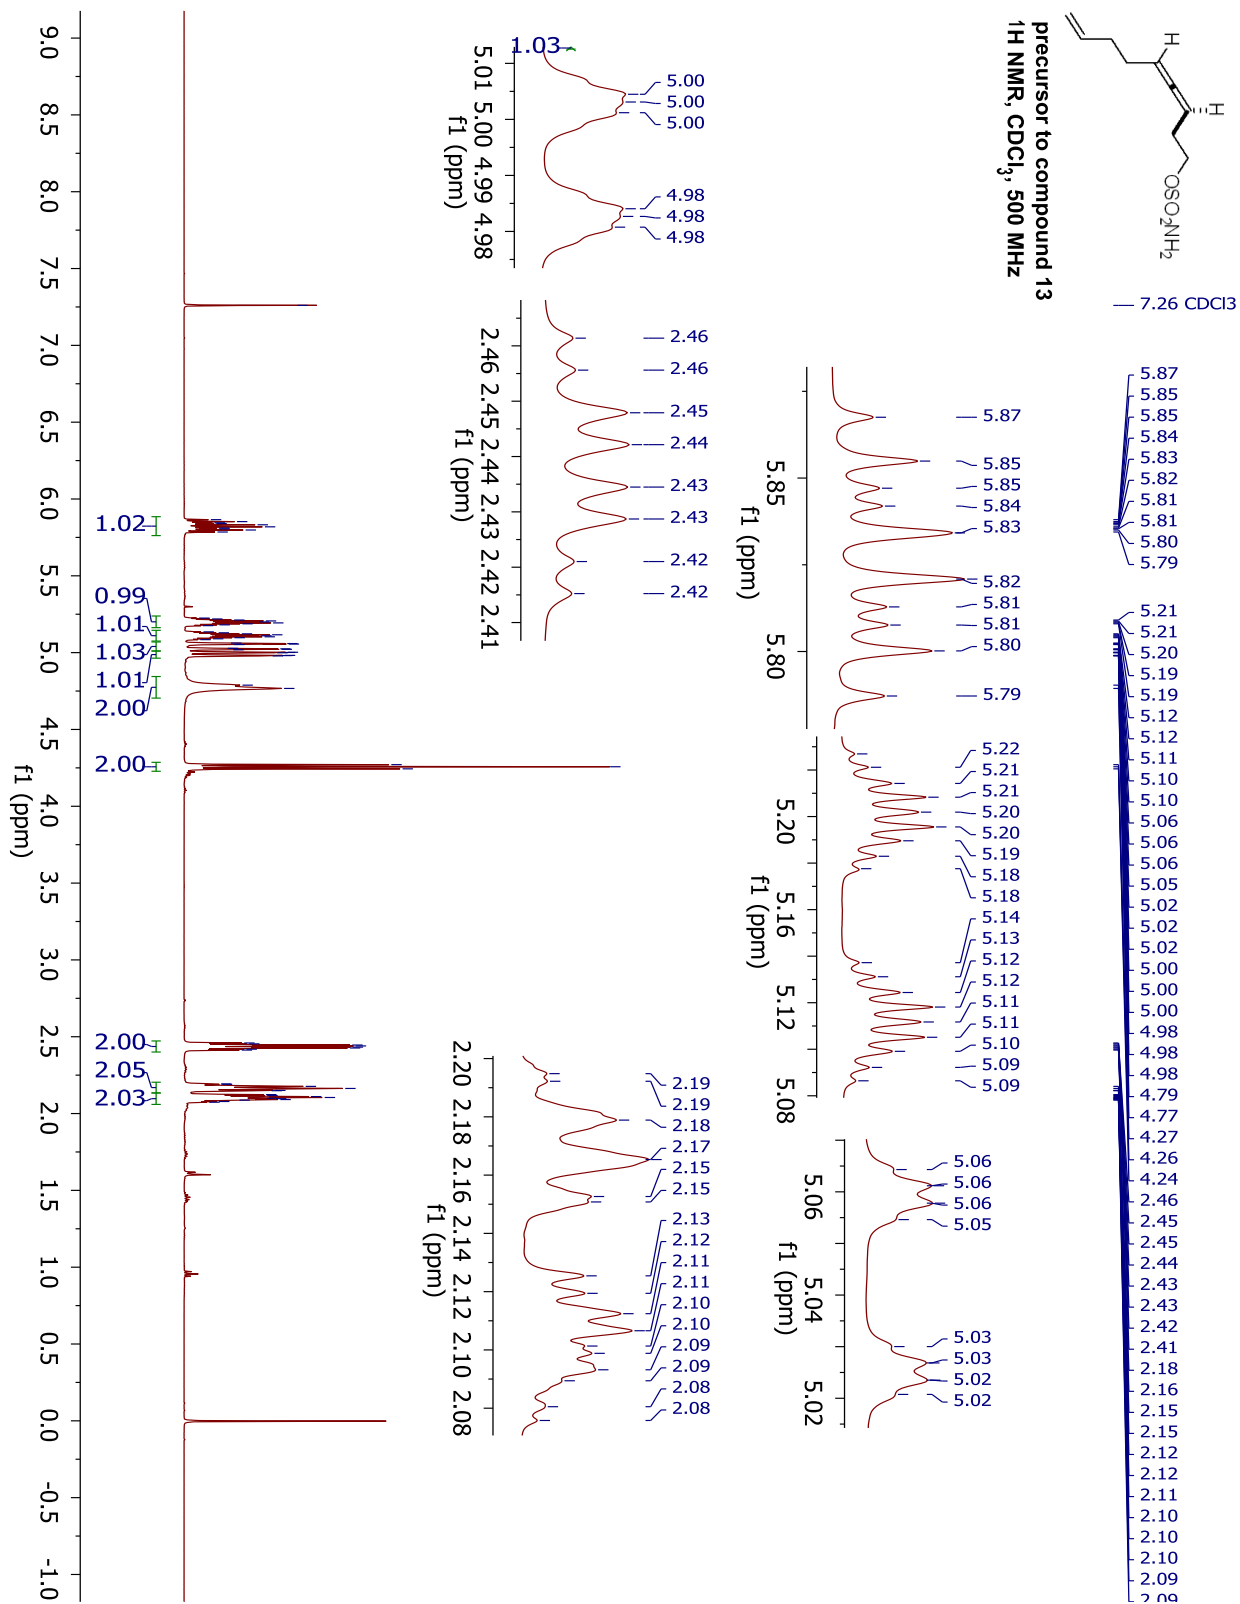

<sup>13</sup>C NMR for the precursor for compound 13.

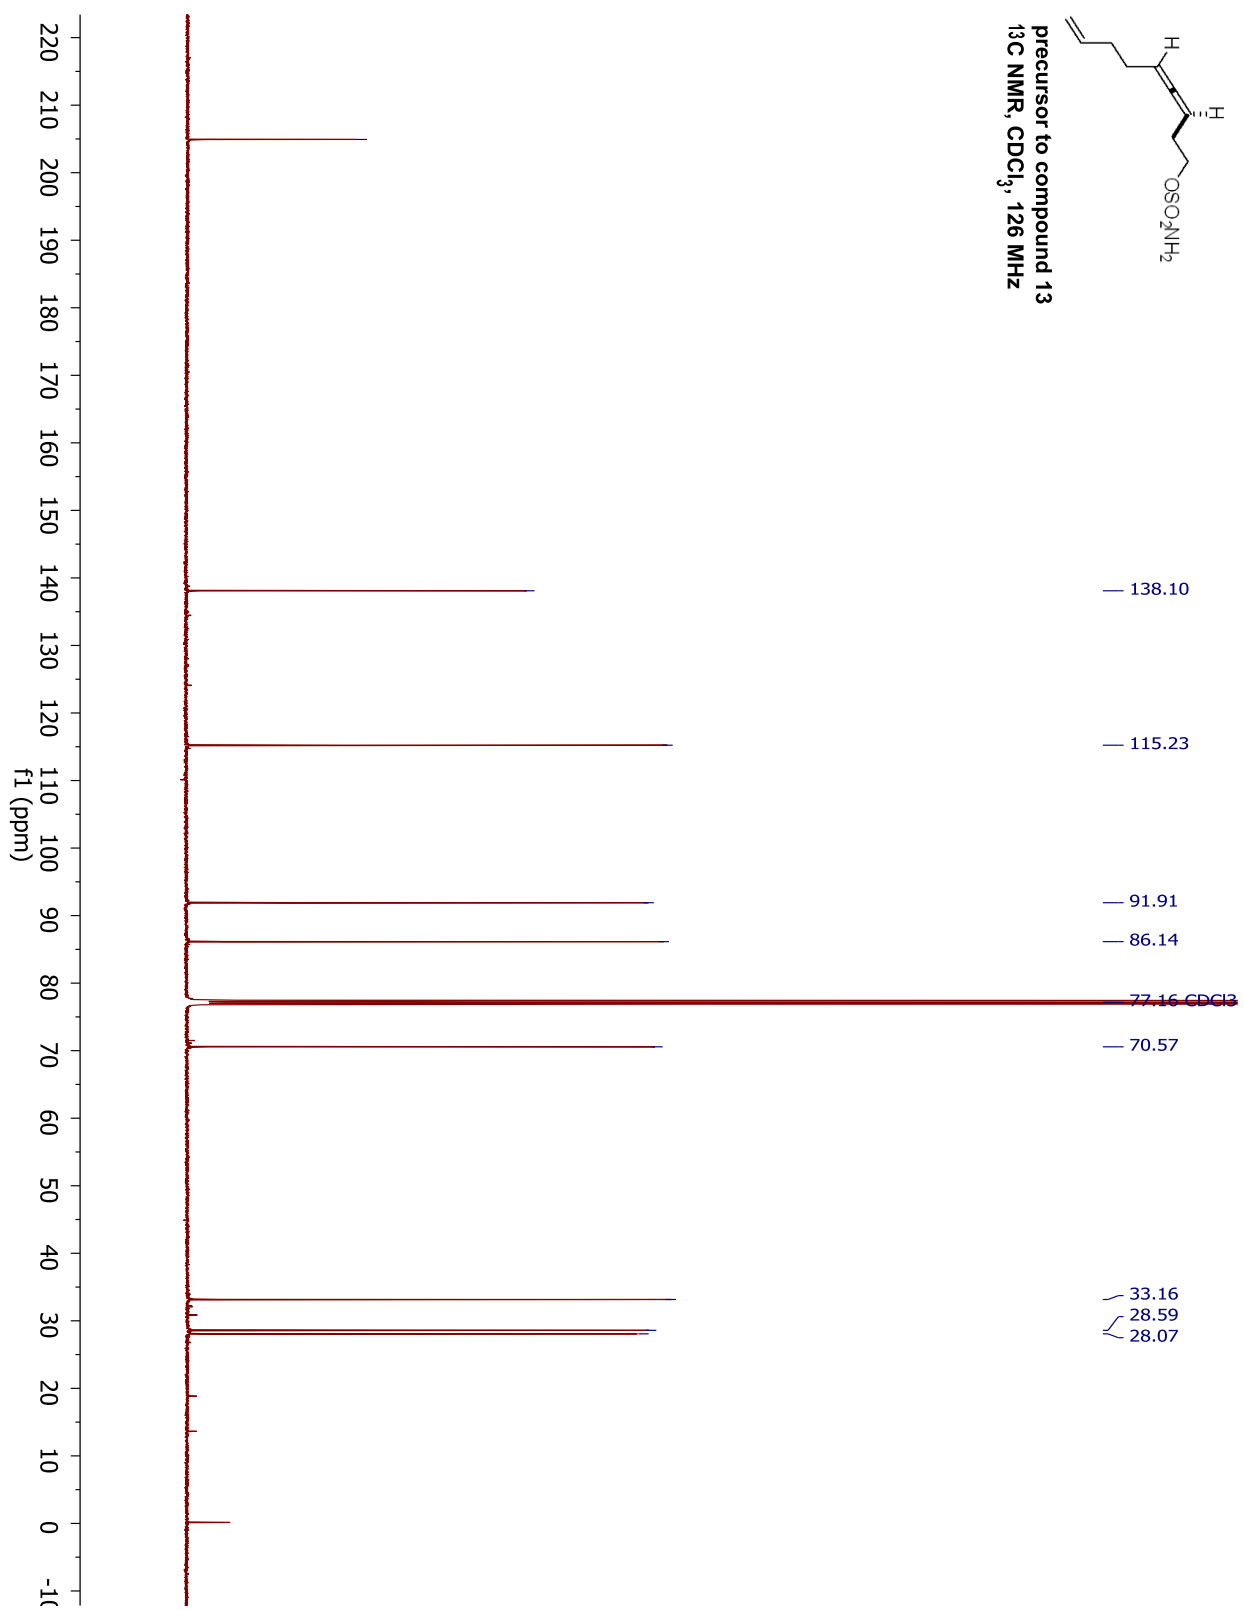

<sup>1</sup>H NMR for the precursor for compound 16.

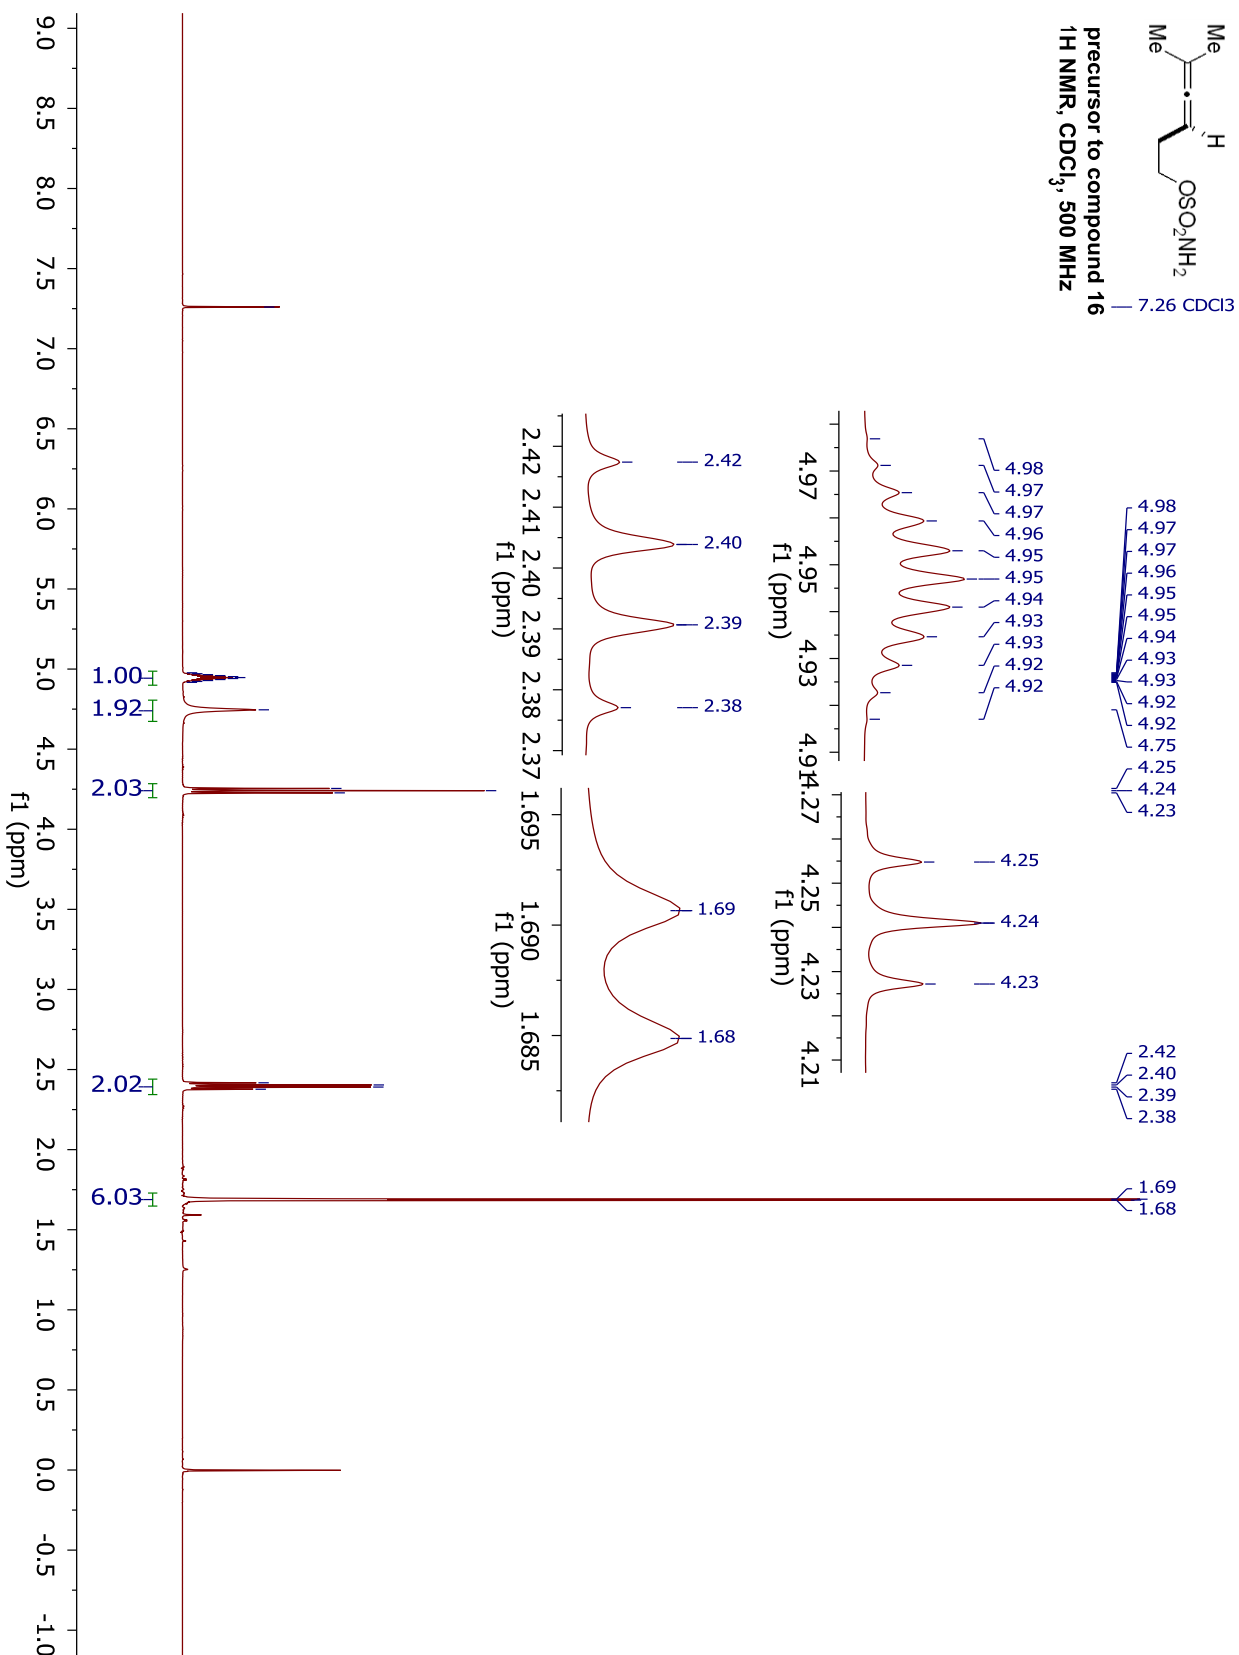

<sup>13</sup>C NMR for the precursor for compound 16.

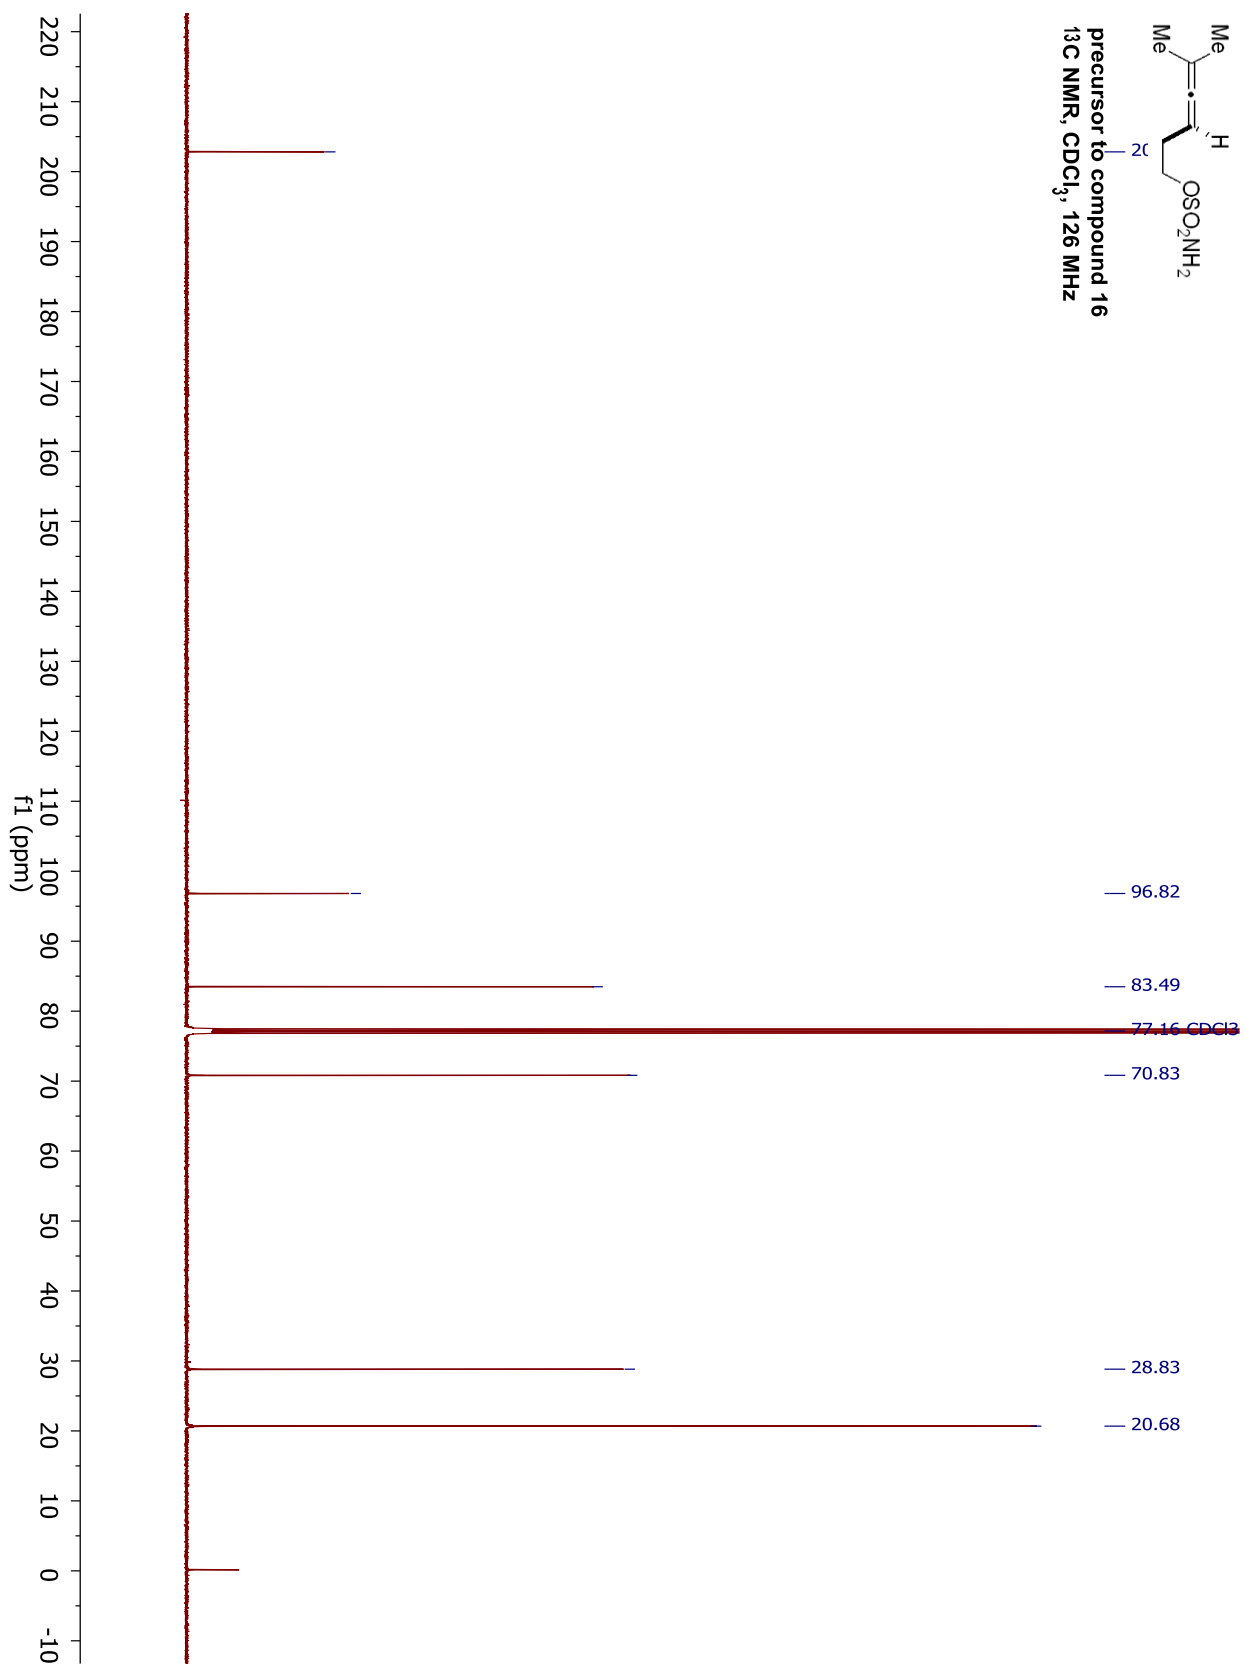



# <sup>1</sup>H NMR for the precursor for compound 17.

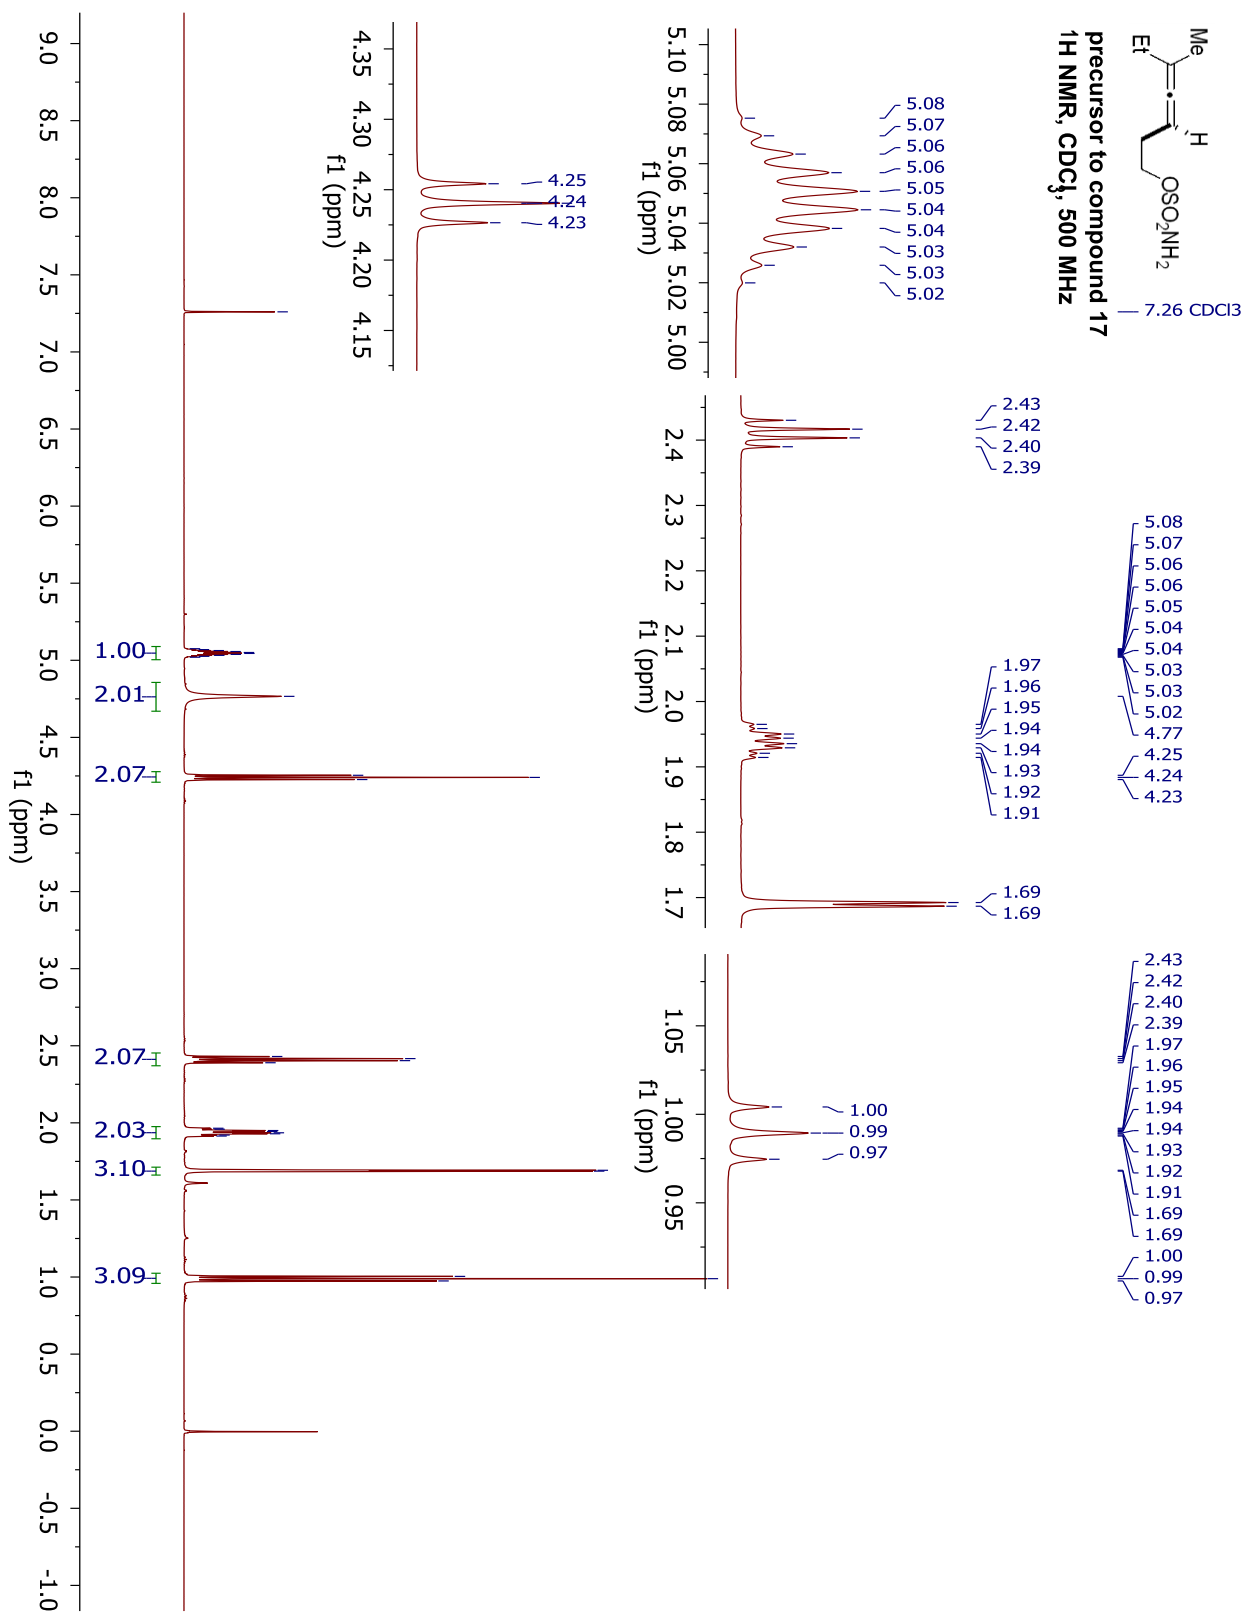

<sup>13</sup>C NMR for the precursor for compound 17.

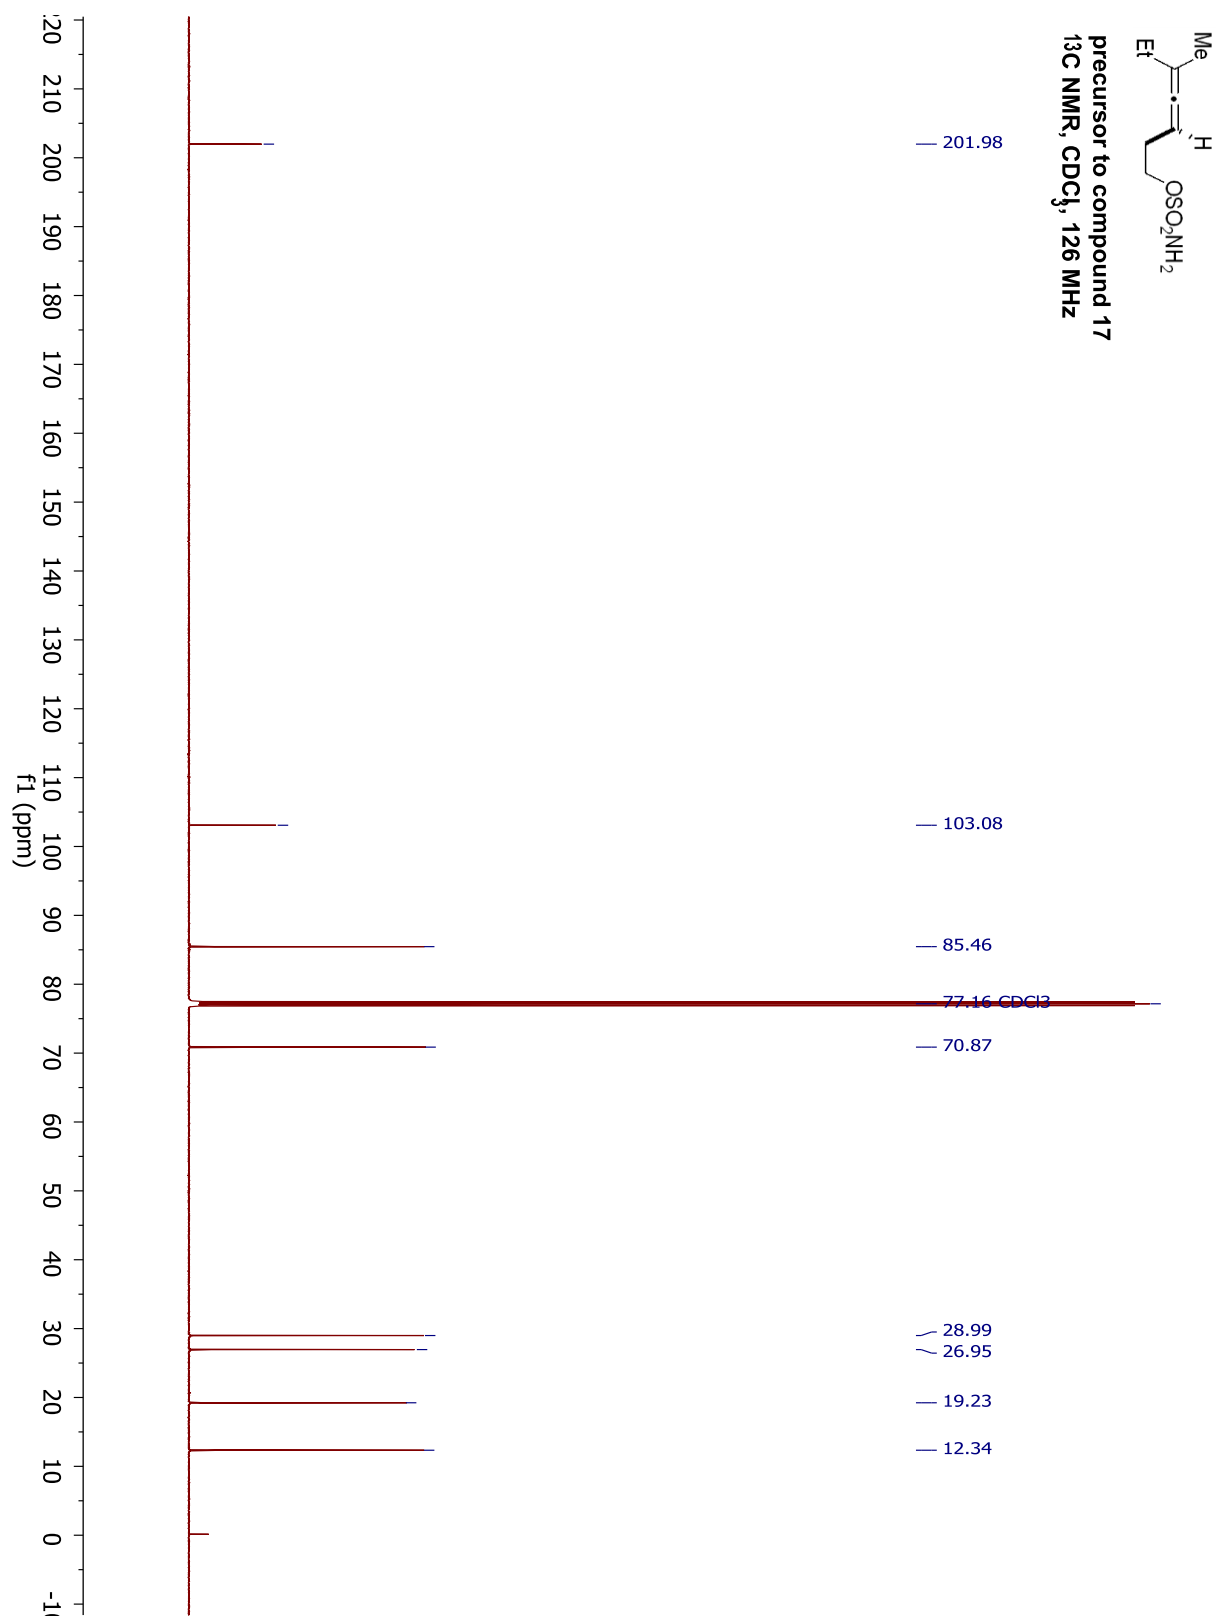

# <sup>1</sup>H NMR for the precursor for compound 20.

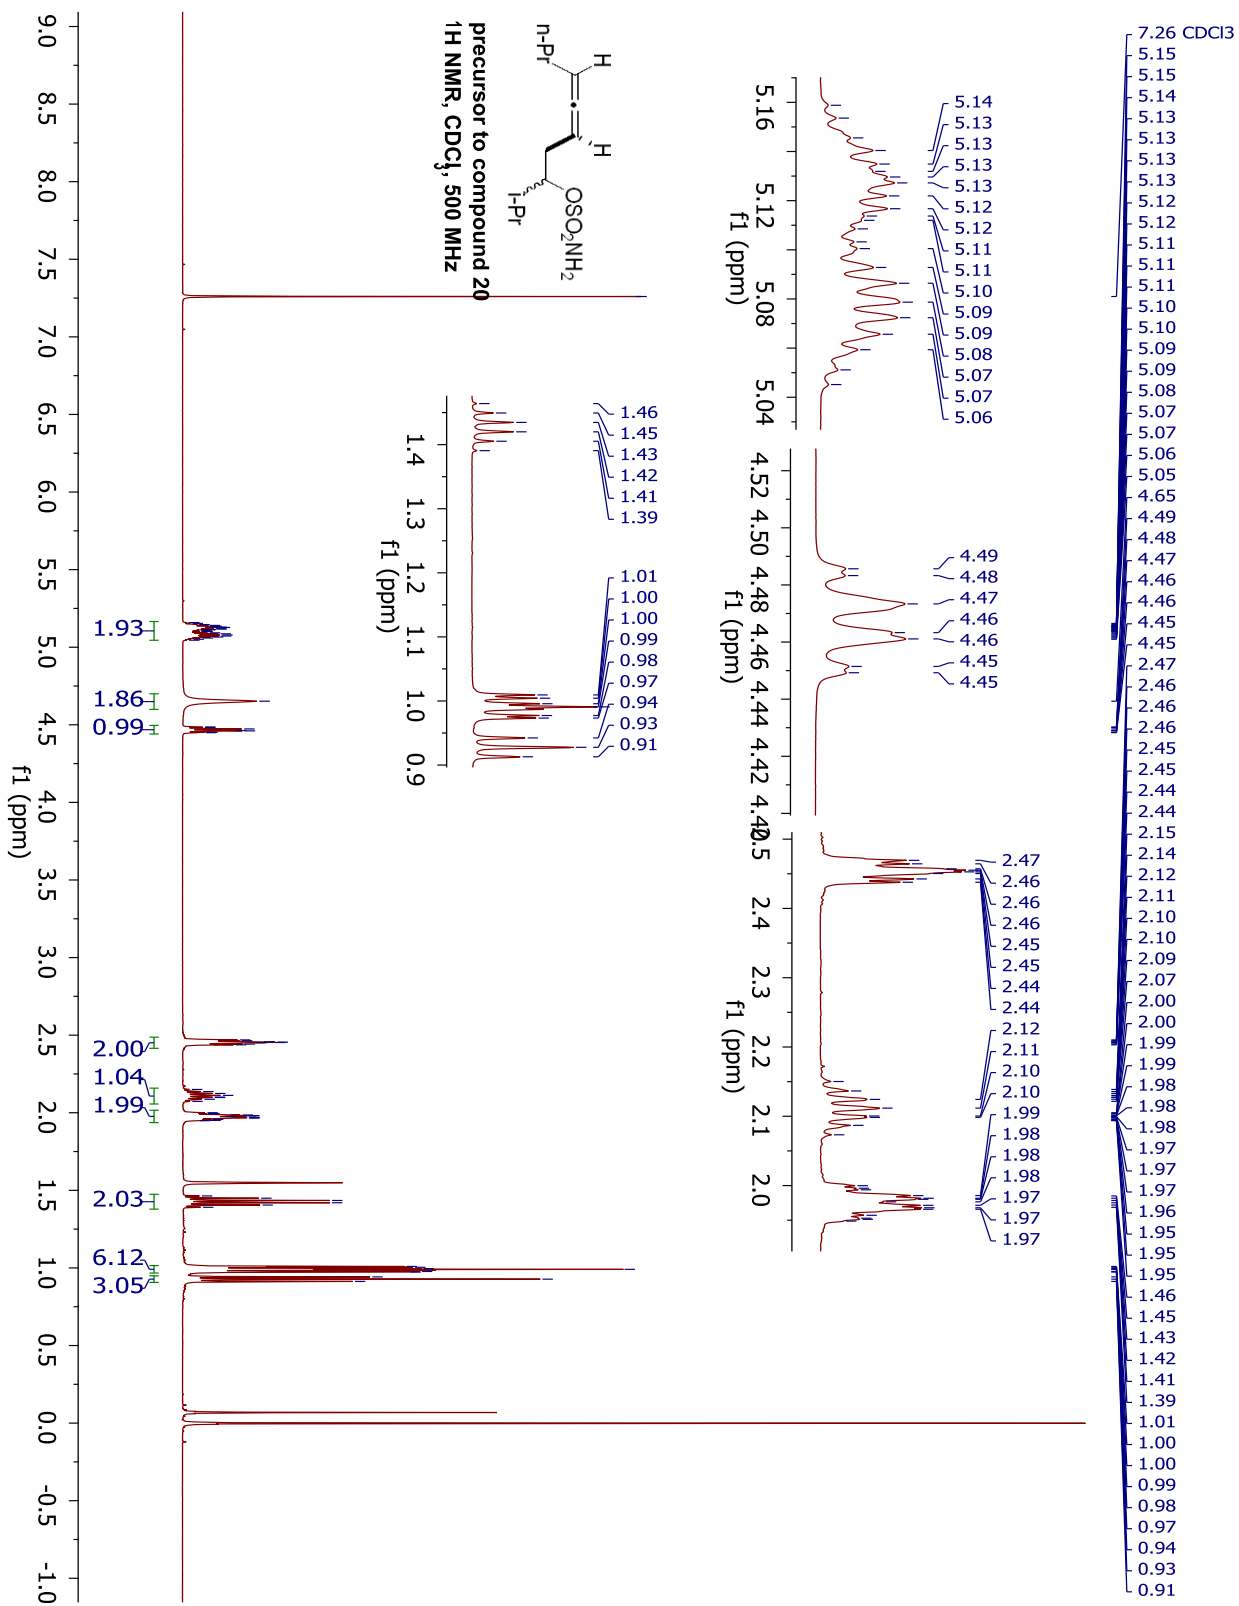

<sup>13</sup>C NMR for the precursor for compound 20.

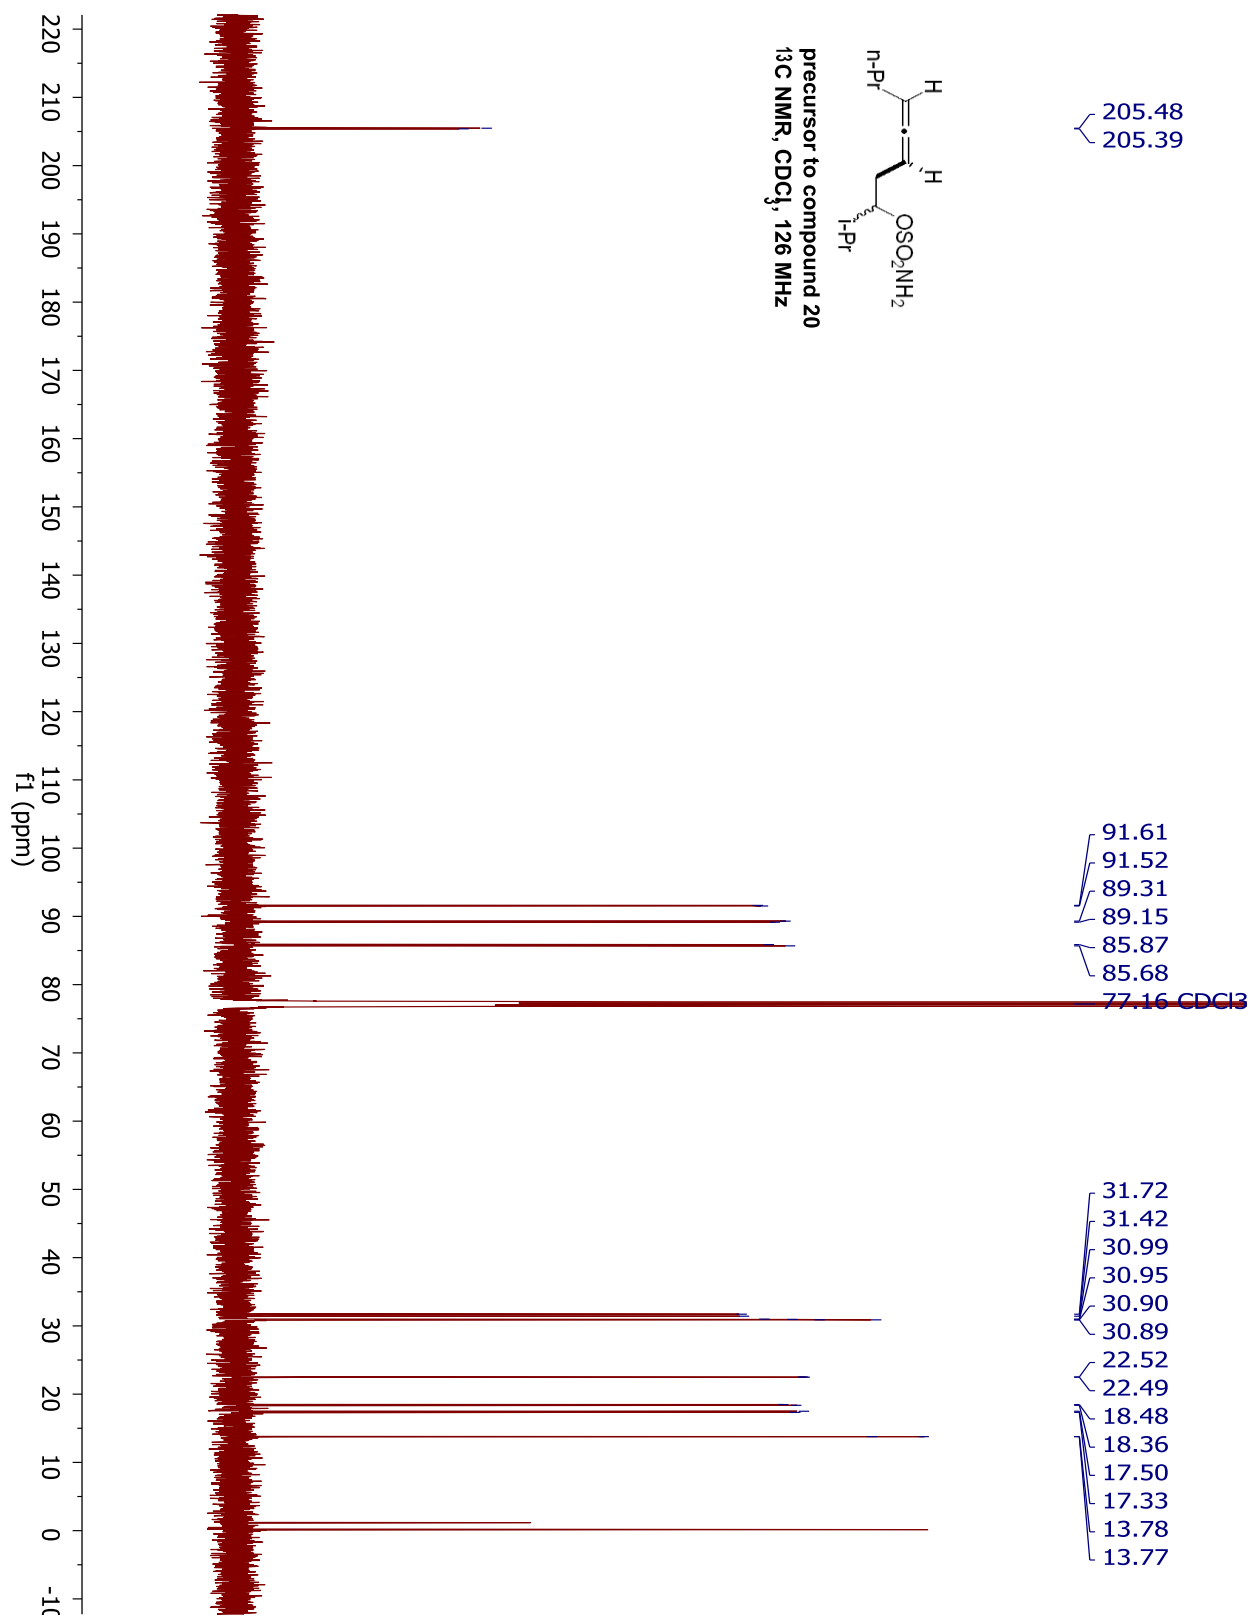

<sup>1</sup>H NMR for compound 13.

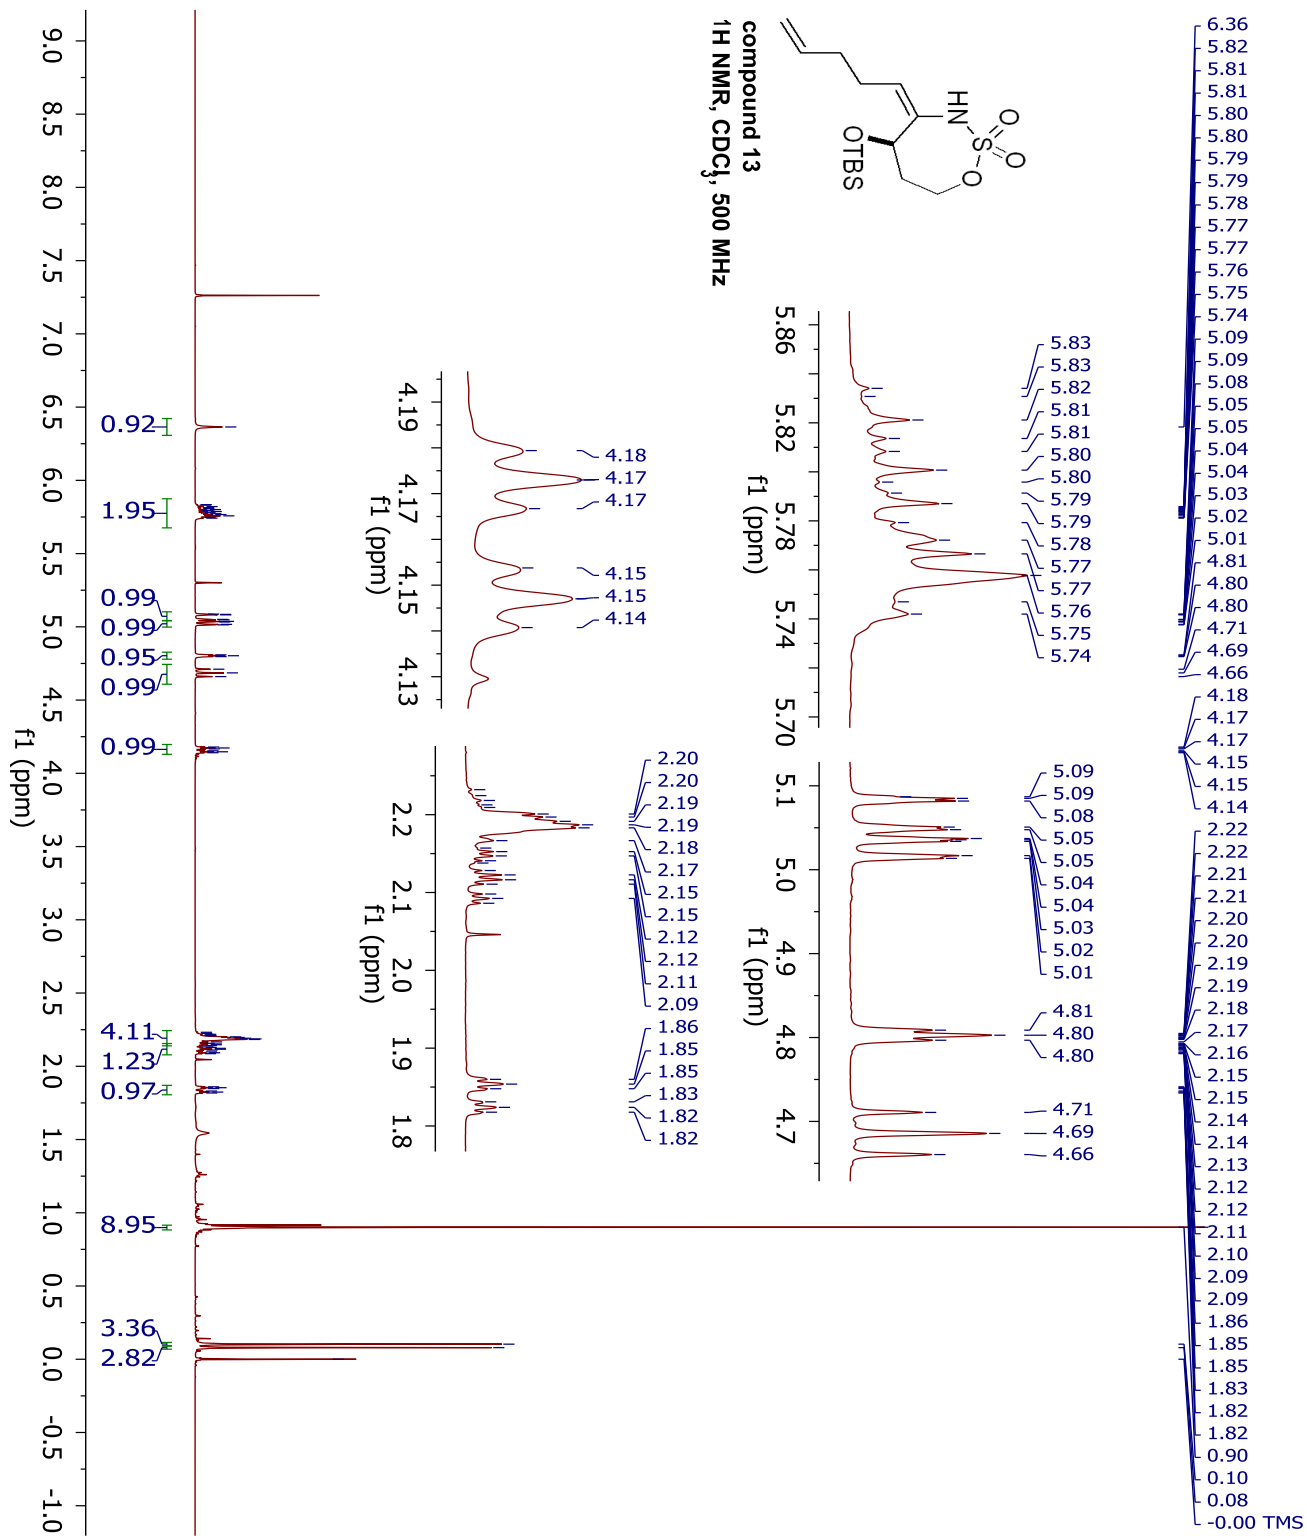

<sup>13</sup>C NMR for compound 13.

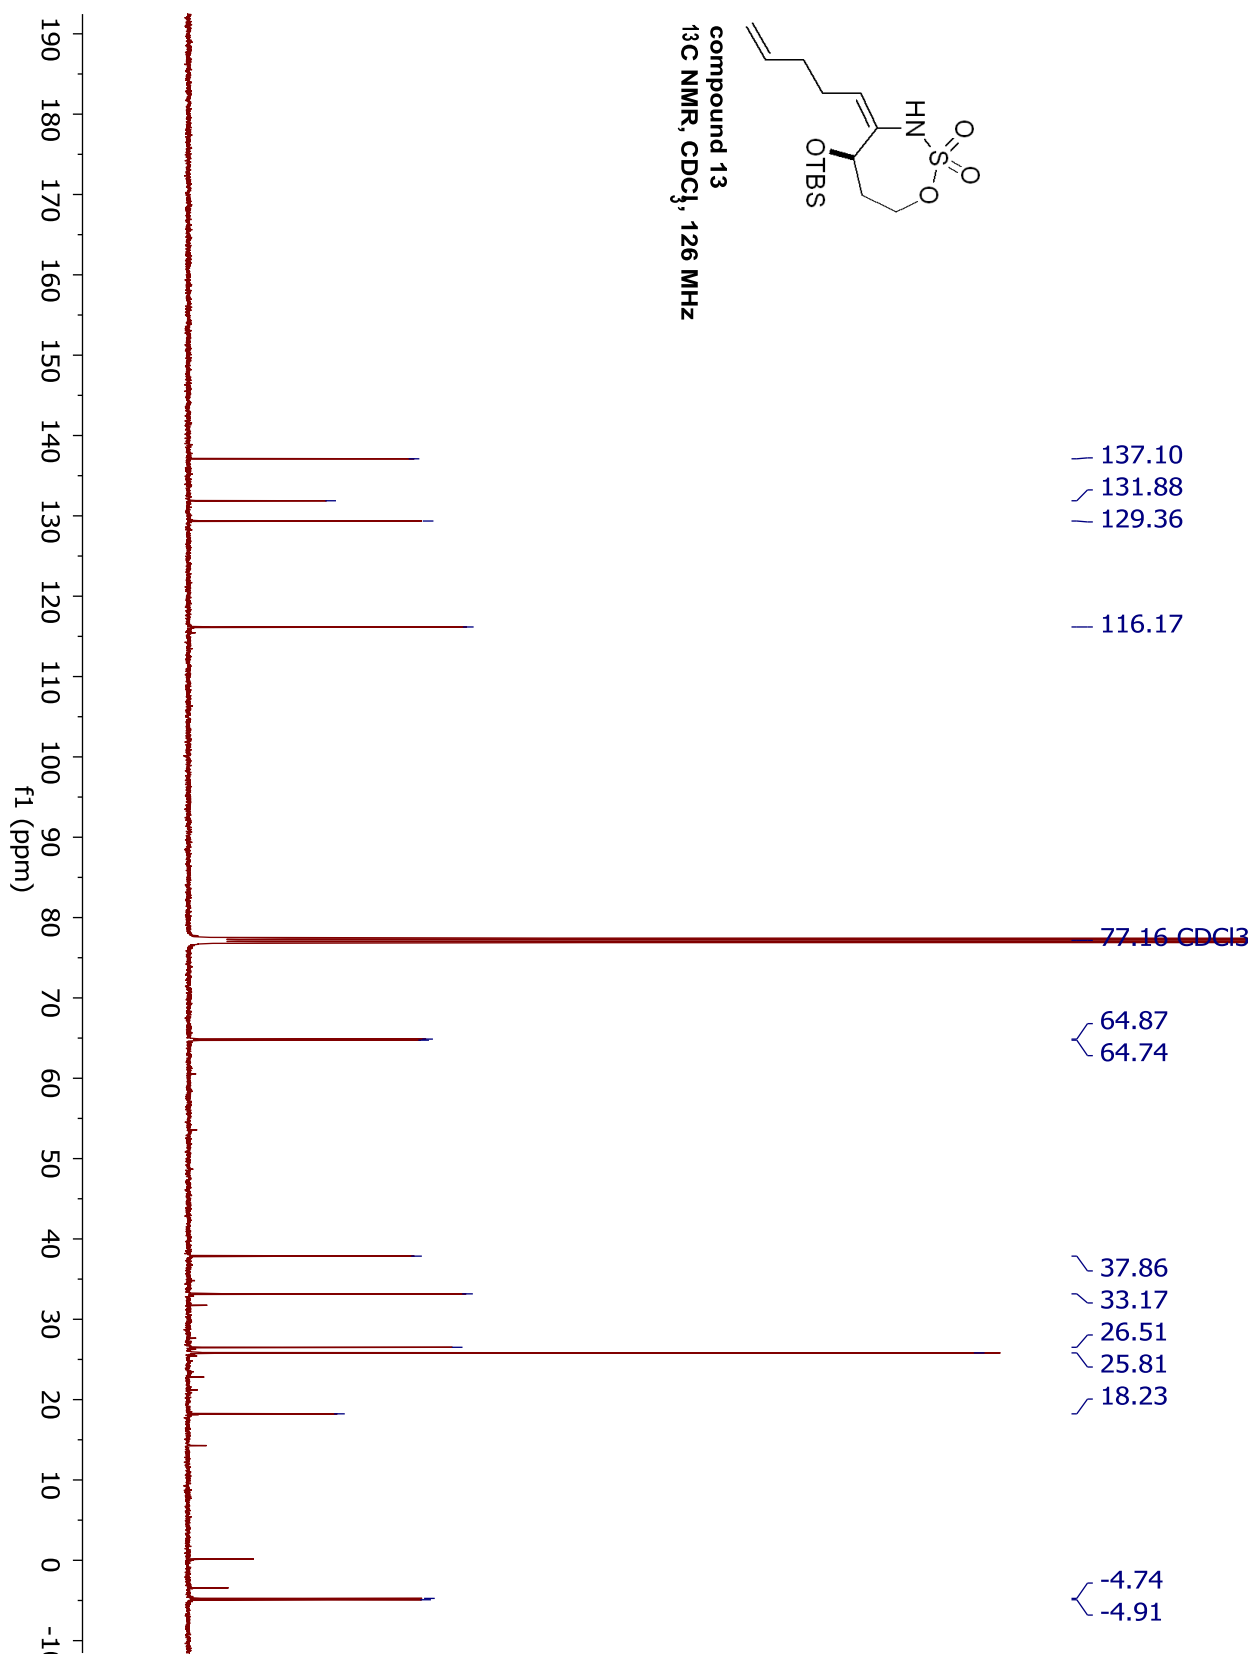

# <sup>1</sup>H NMR for compound 14.

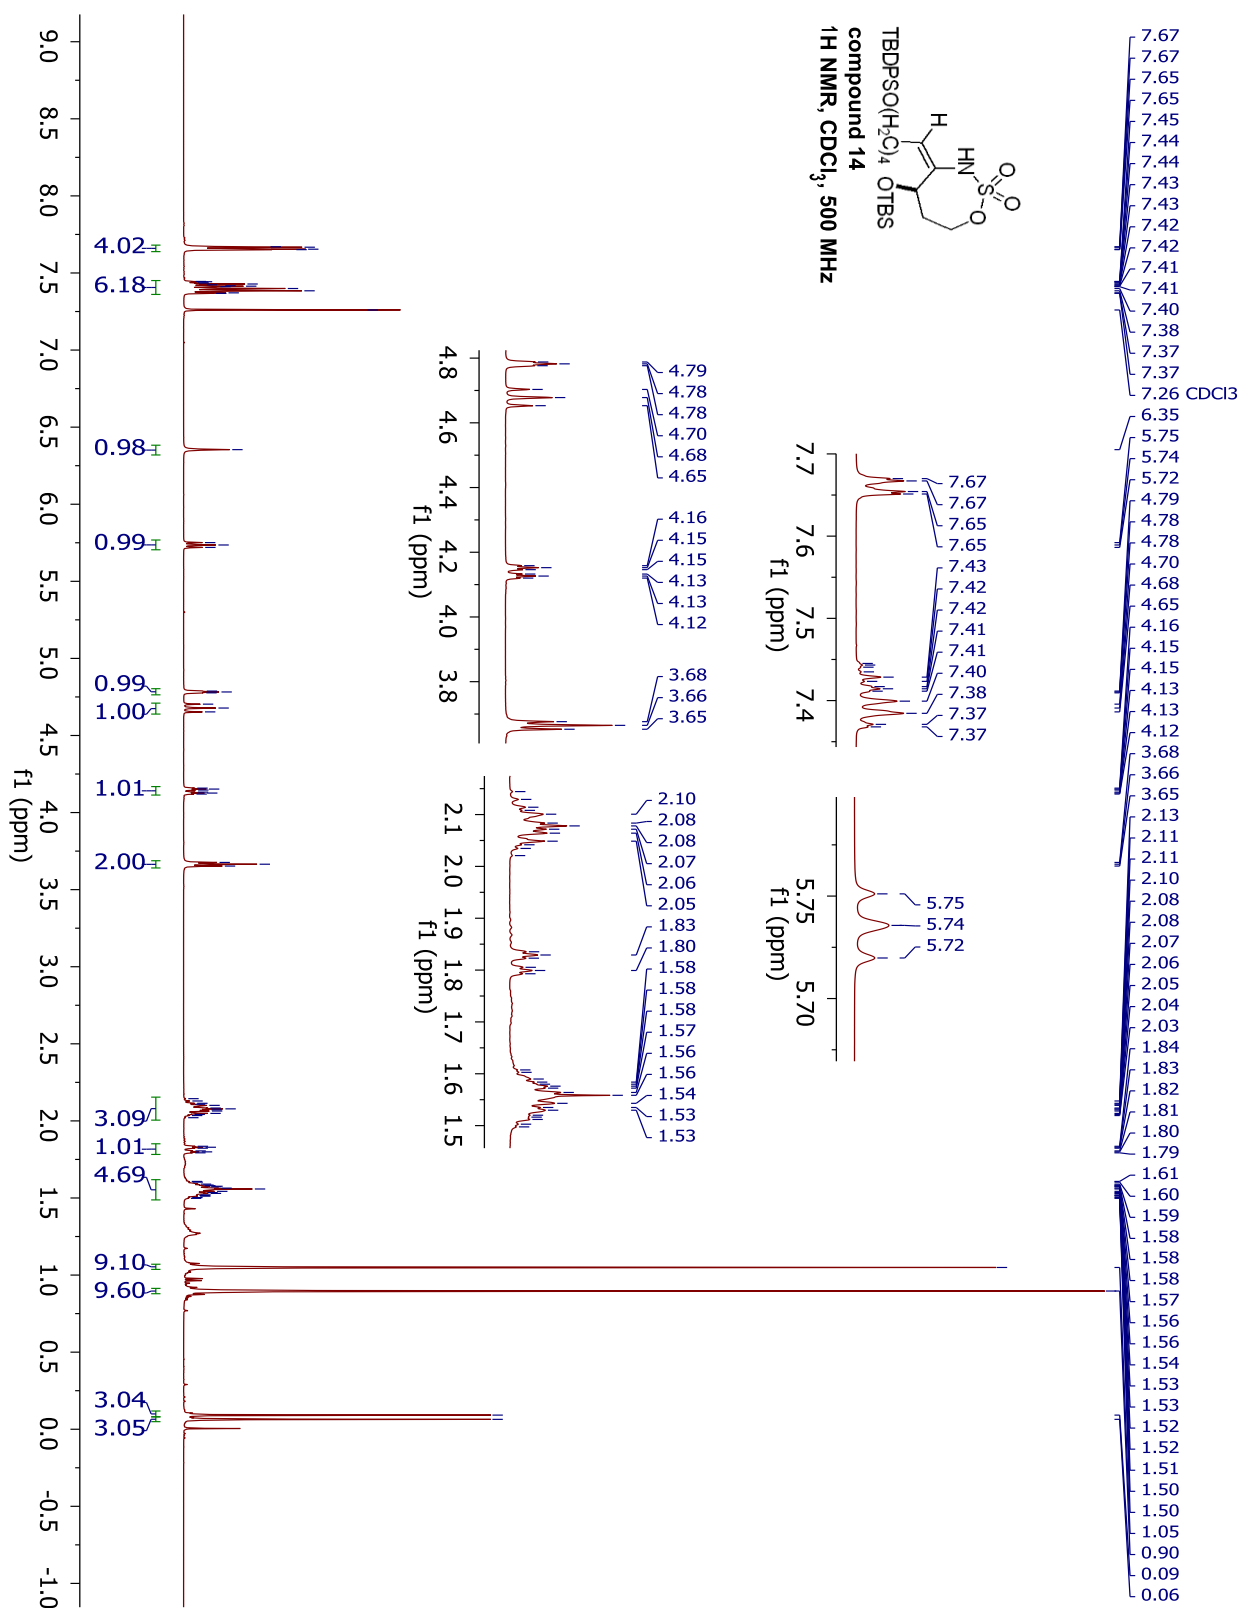

<sup>13</sup>C NMR for compound 14.

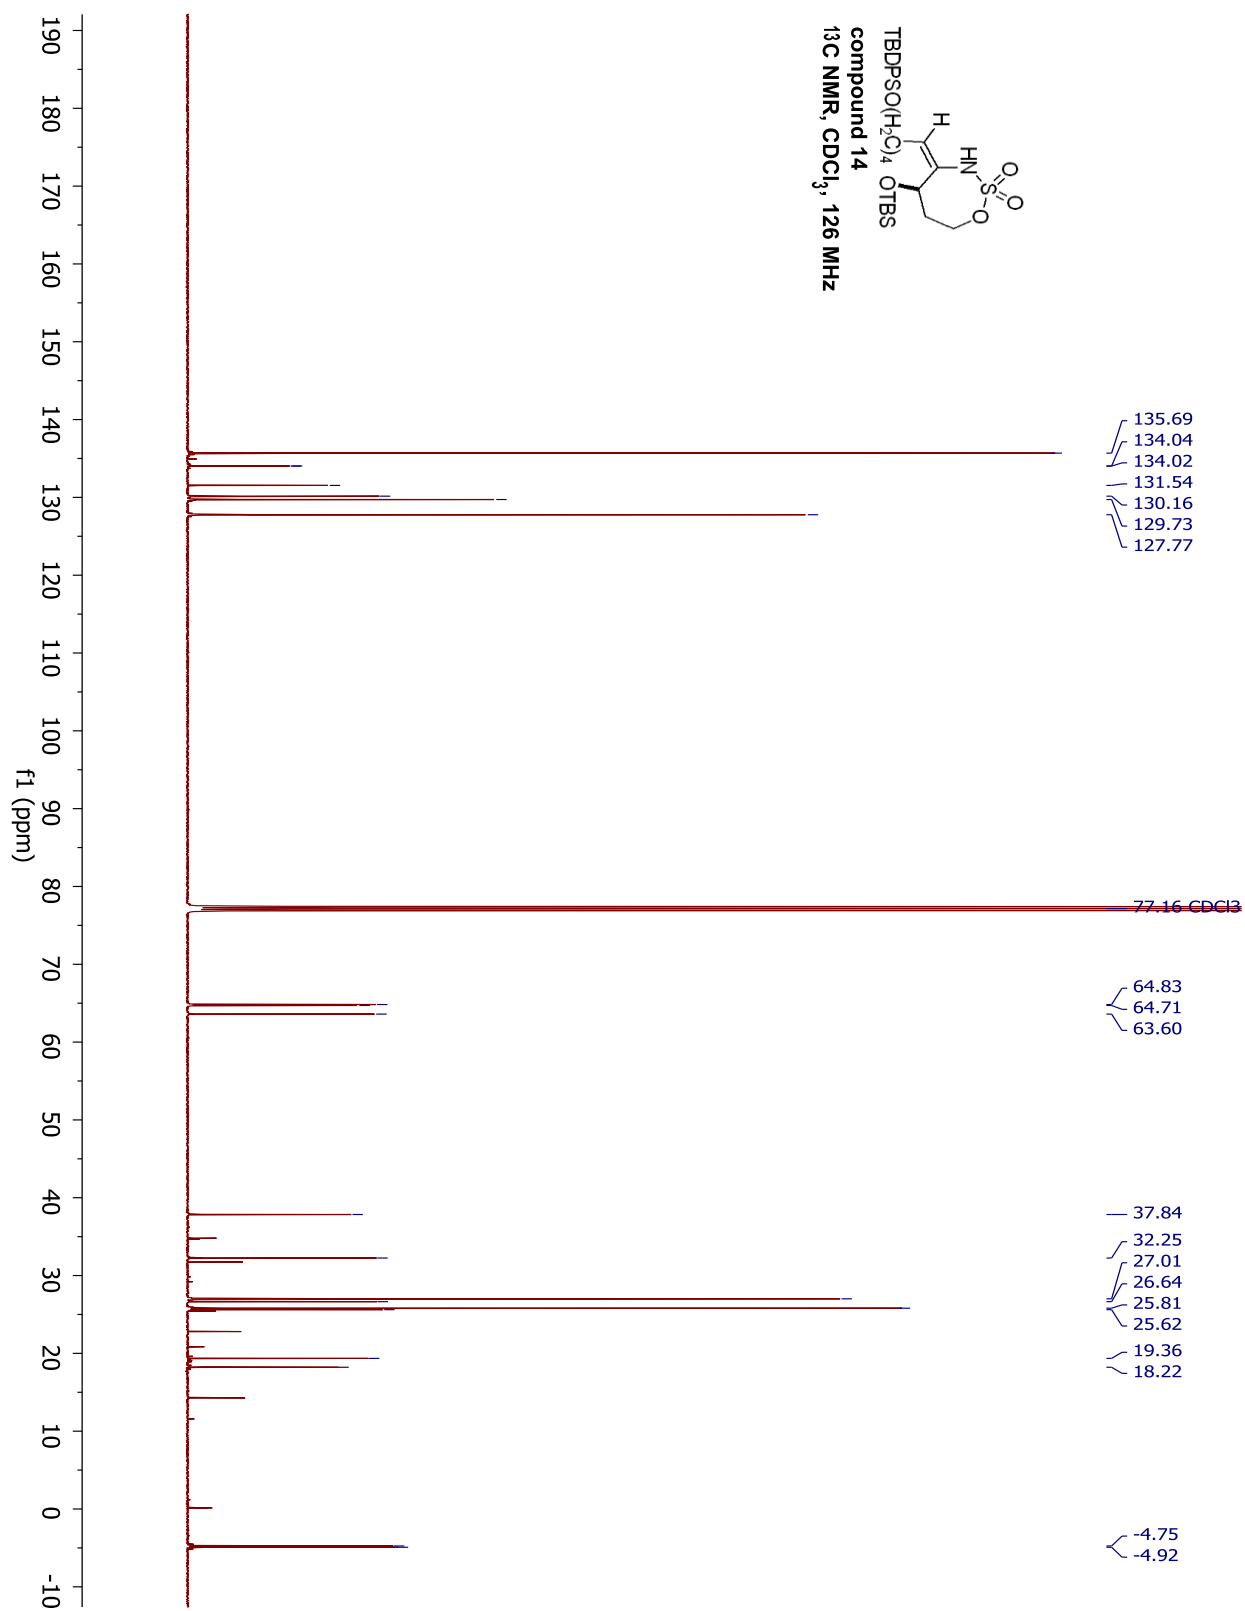



<sup>1</sup>H NMR for compound 16.

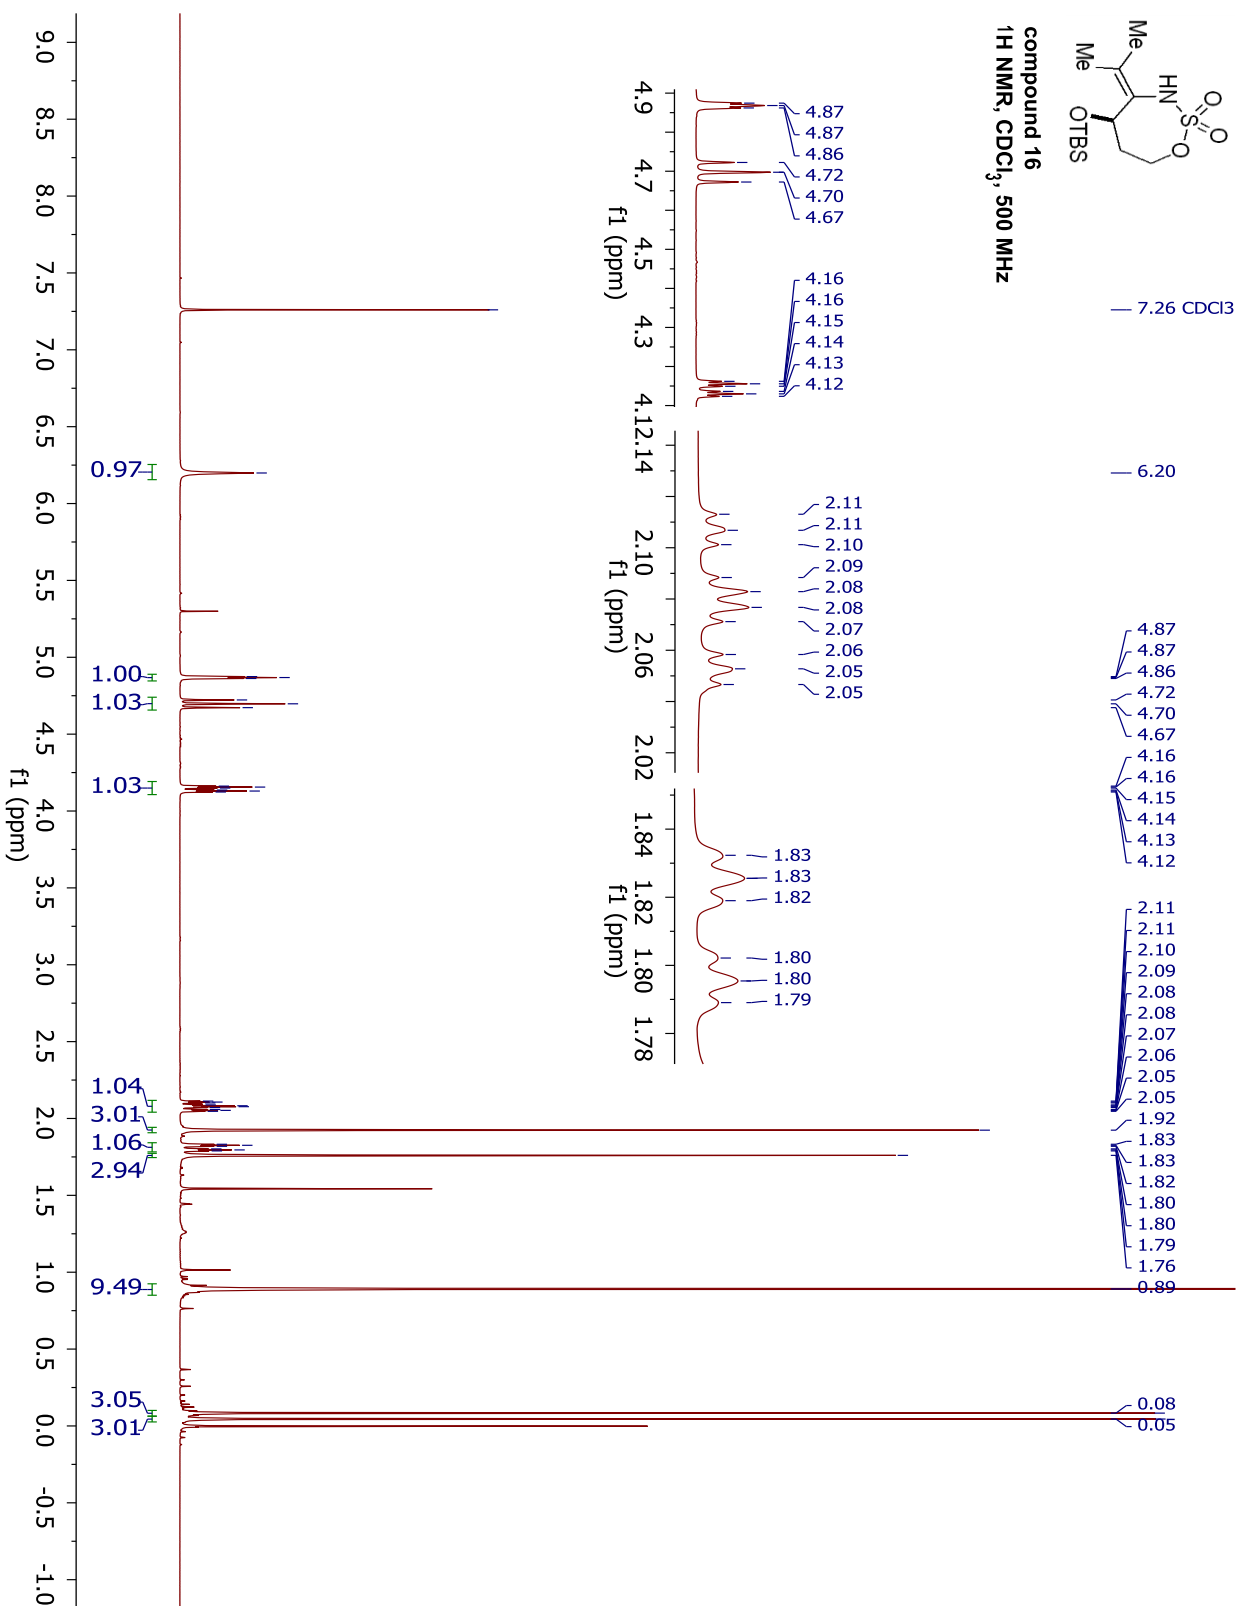

<sup>13</sup>C NMR for compound 16.

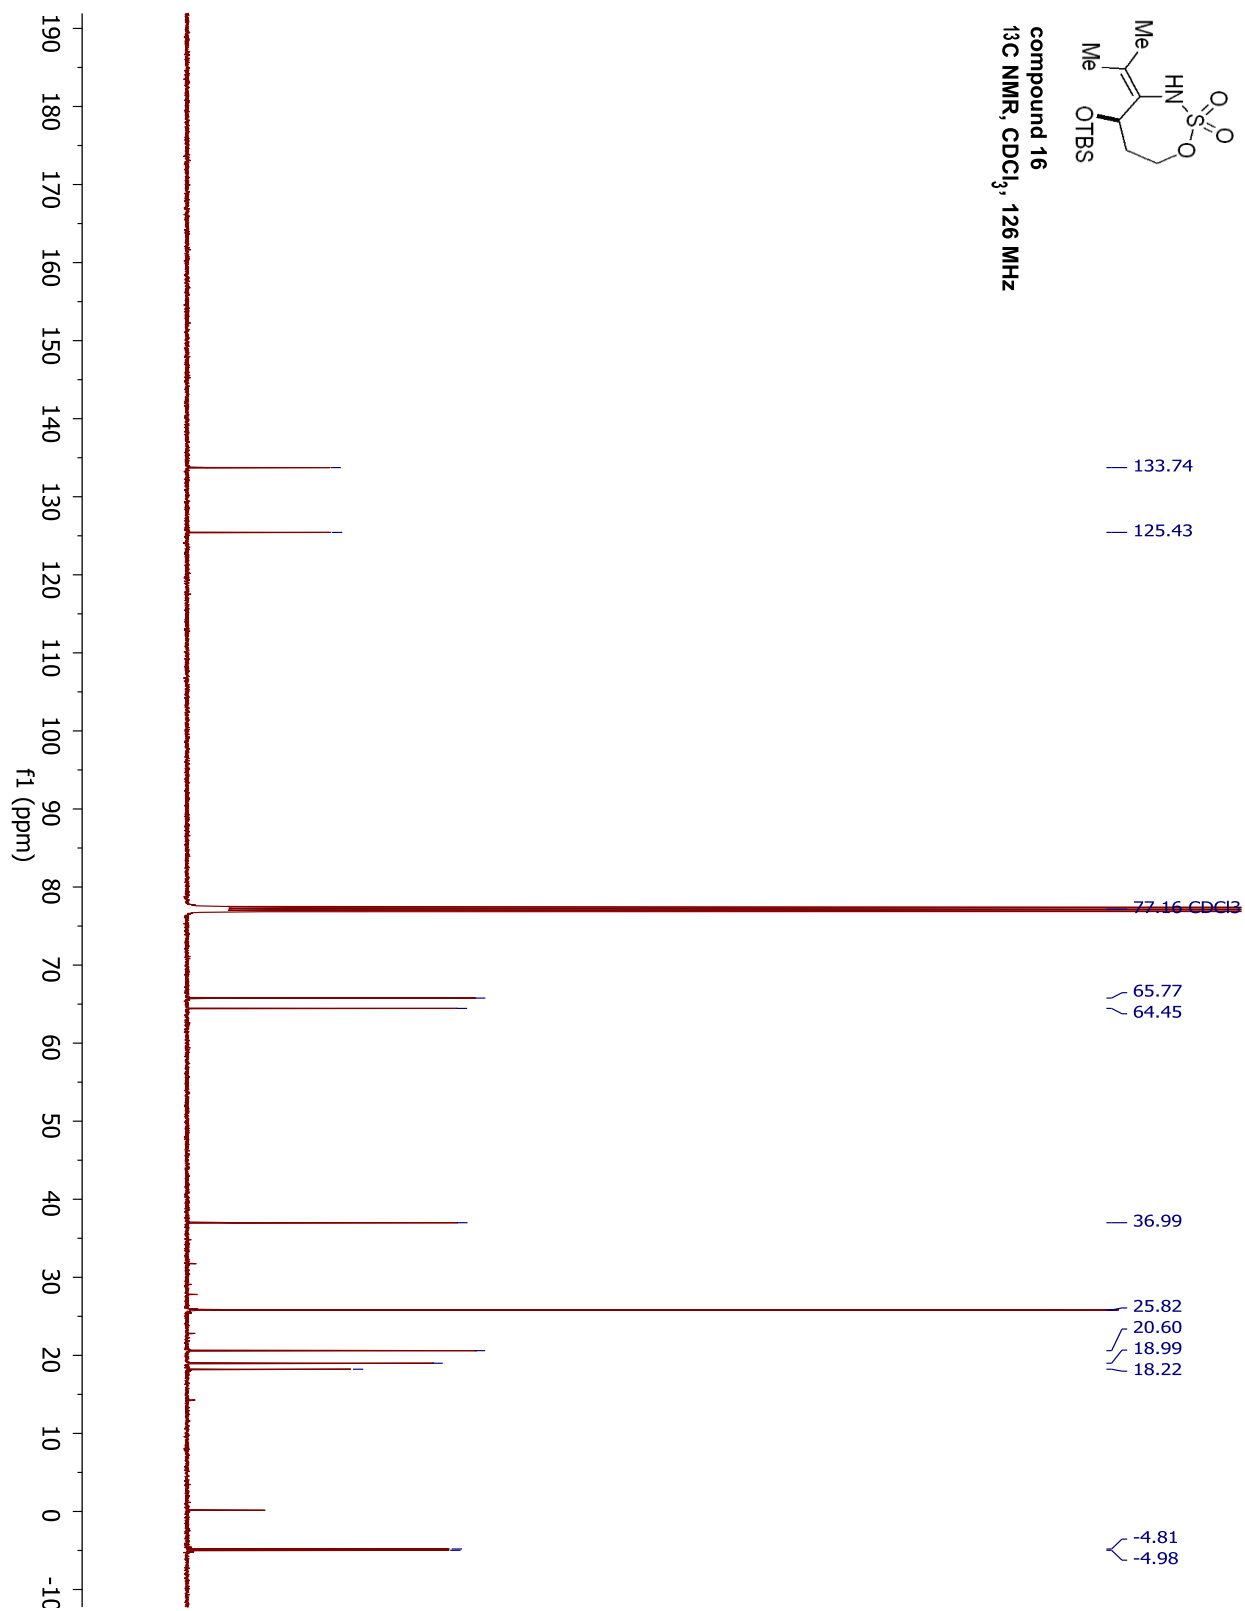

**<sup>1</sup>H NMR for compound 17.**

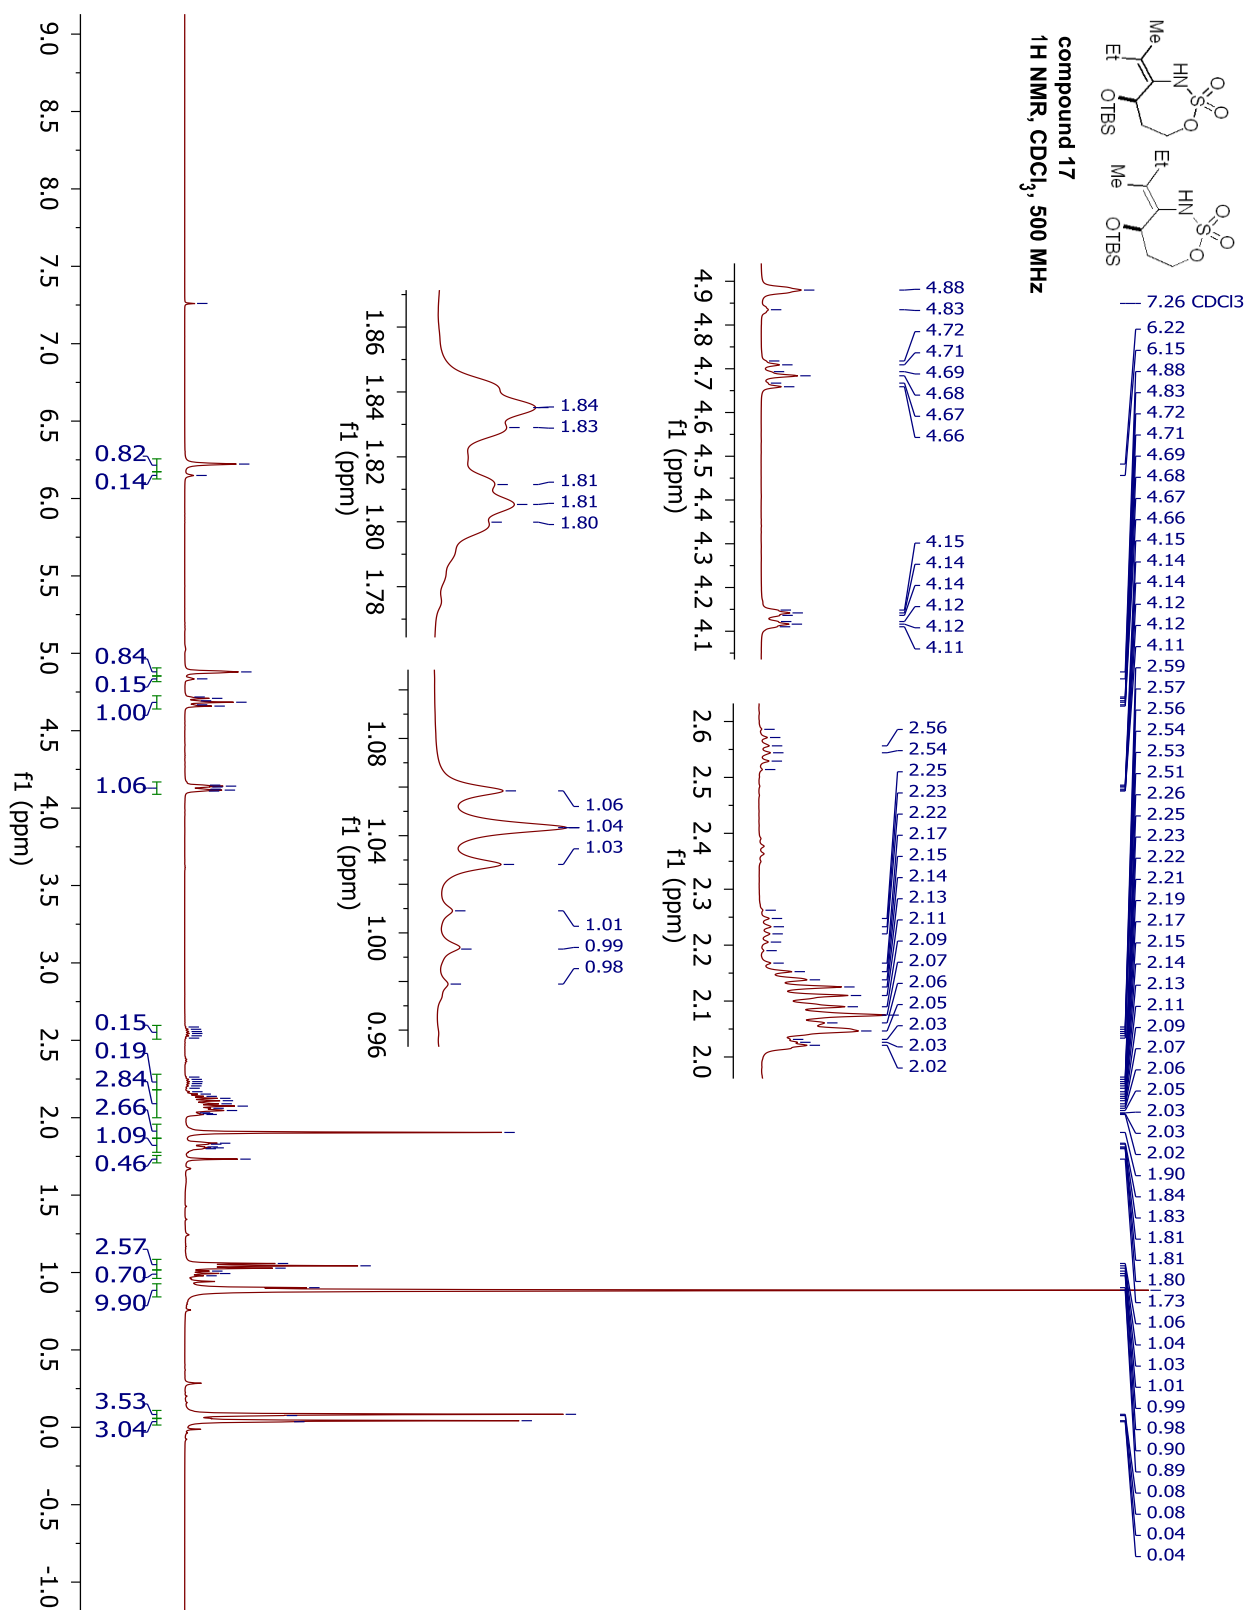

<sup>13</sup>C NMR for compound 17.

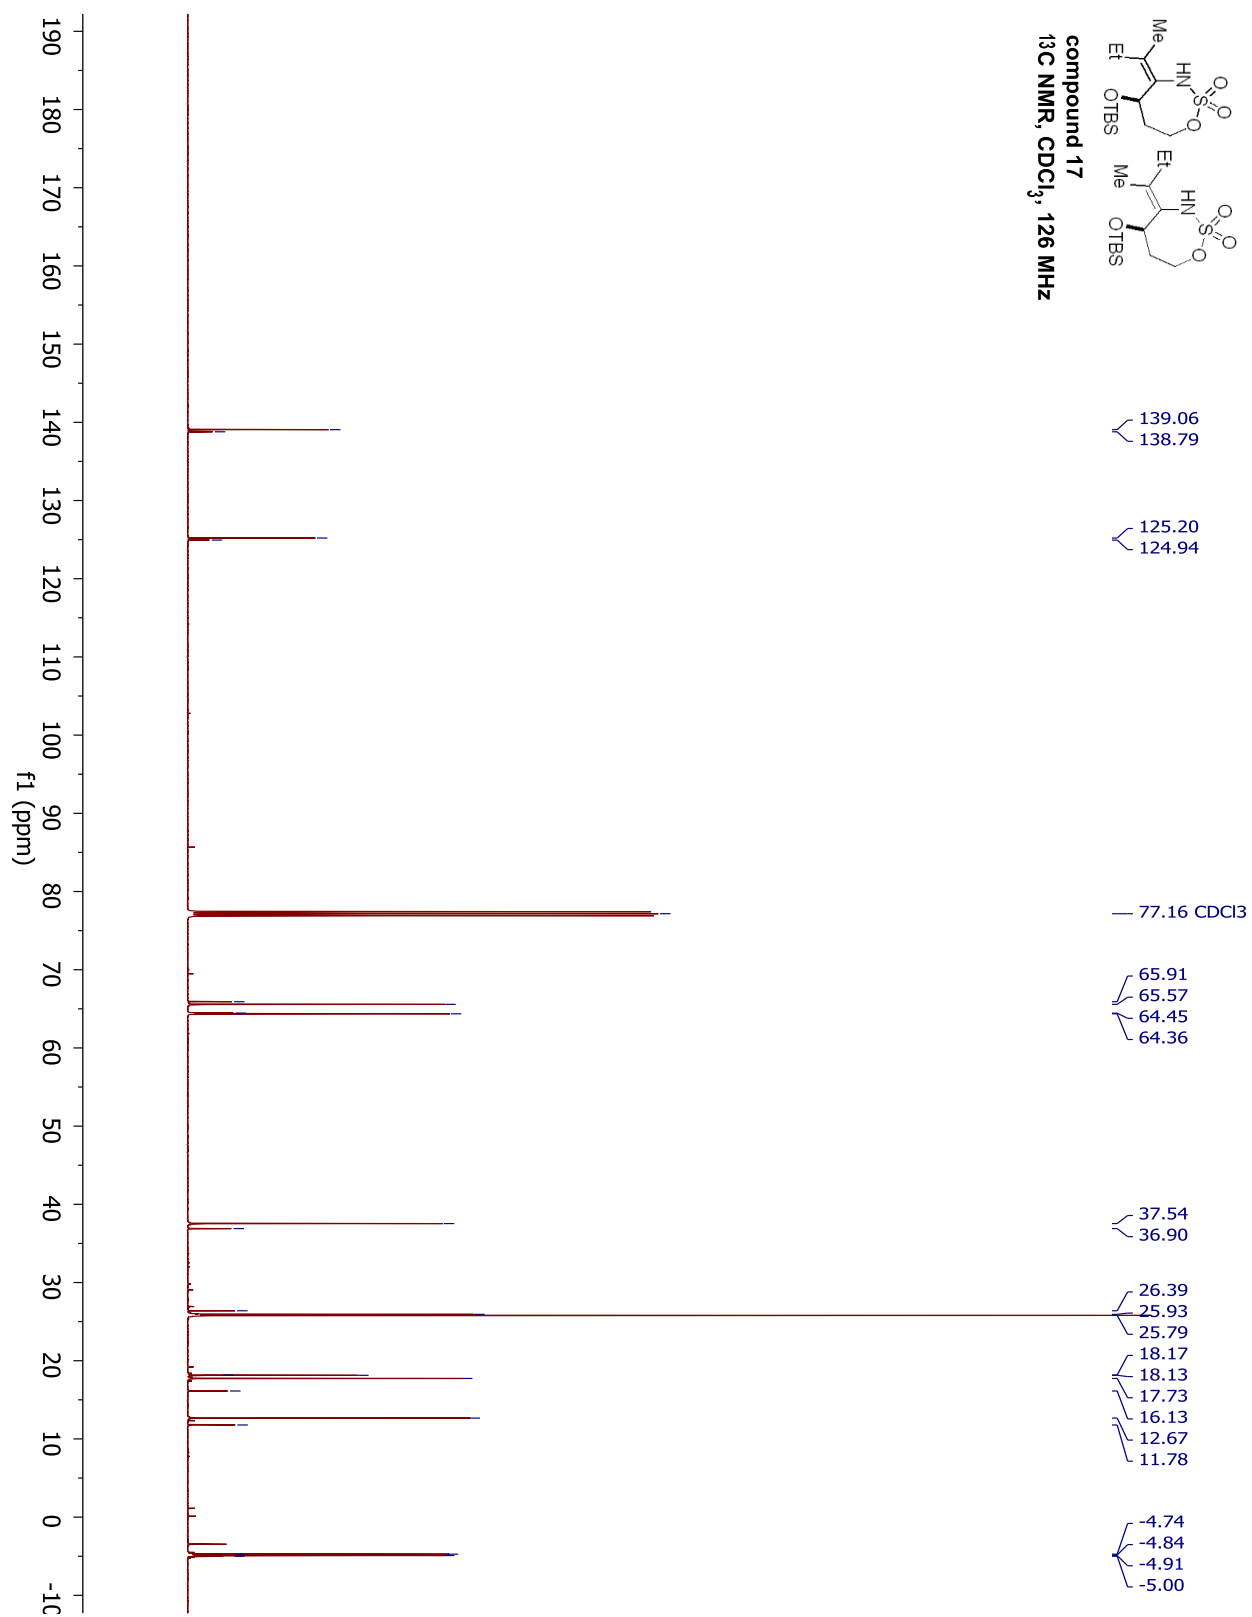

**<sup>1</sup>H NMR for compound 18.**

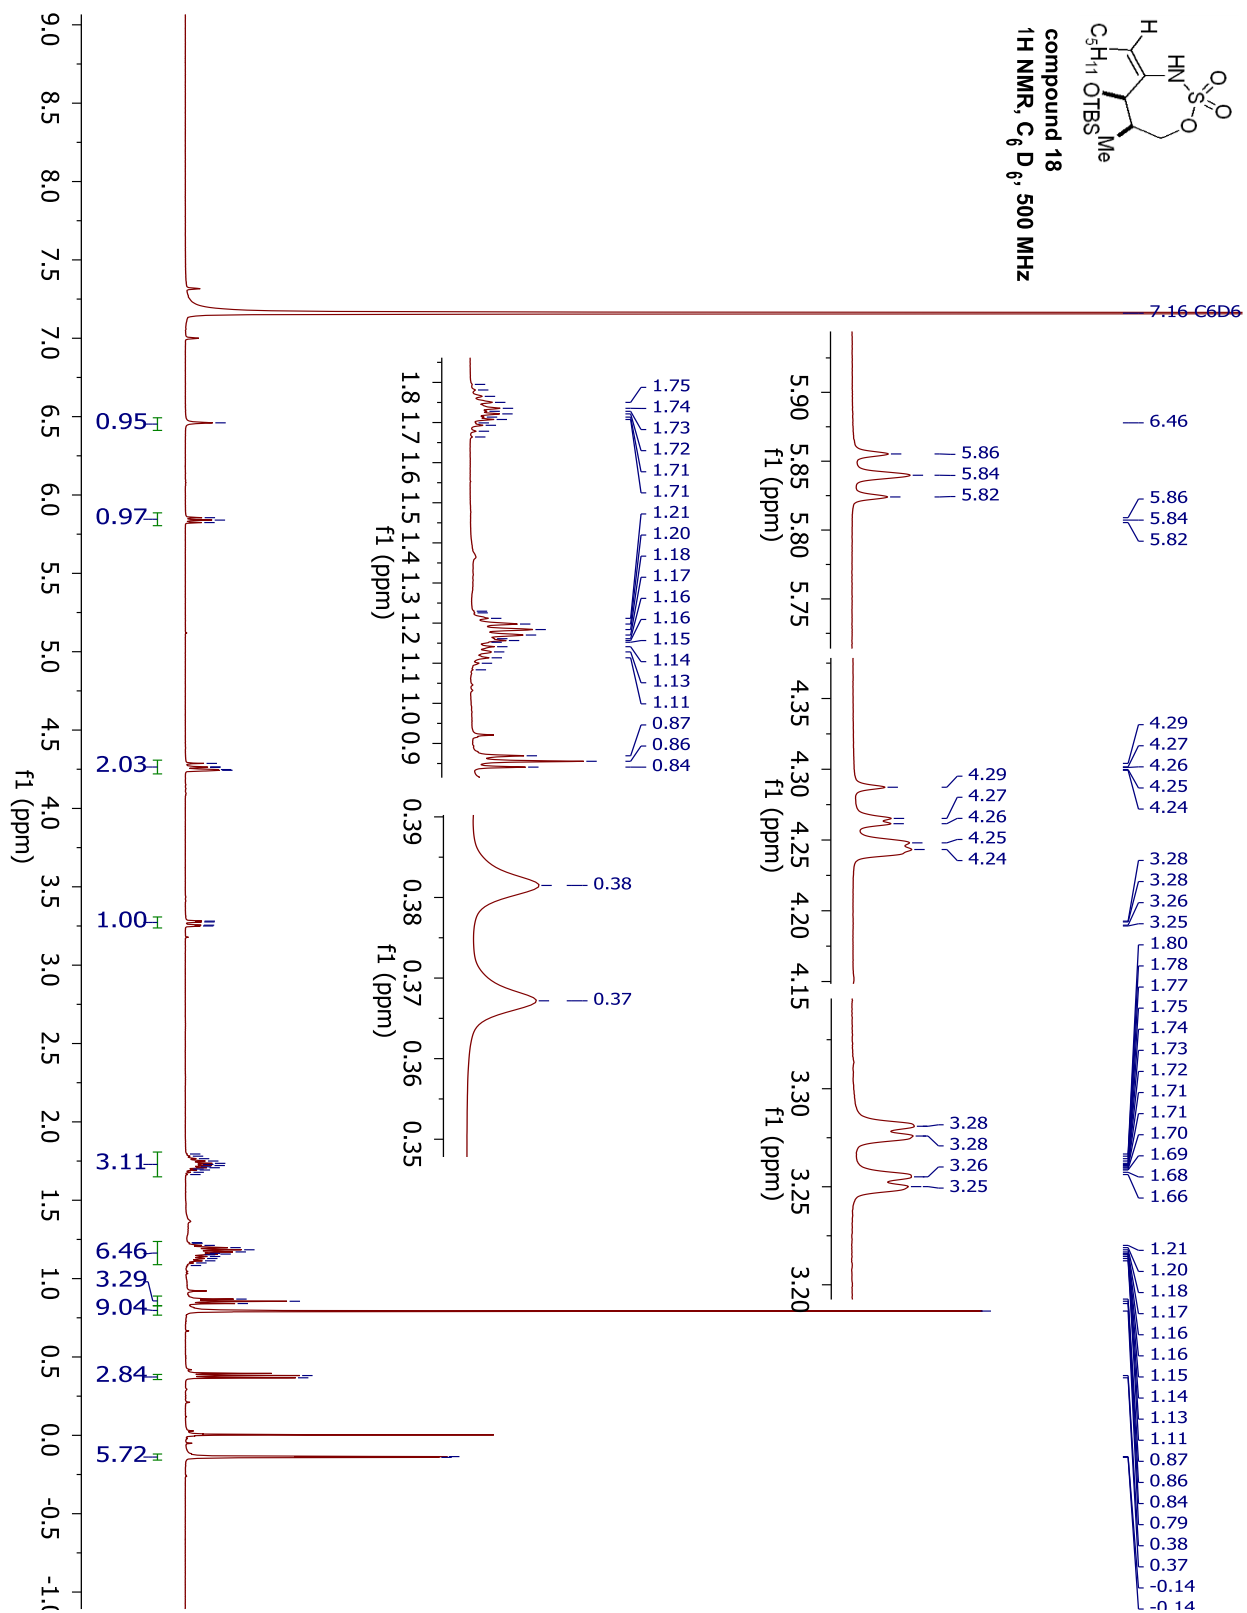

<sup>13</sup>C NMR for compound 18.

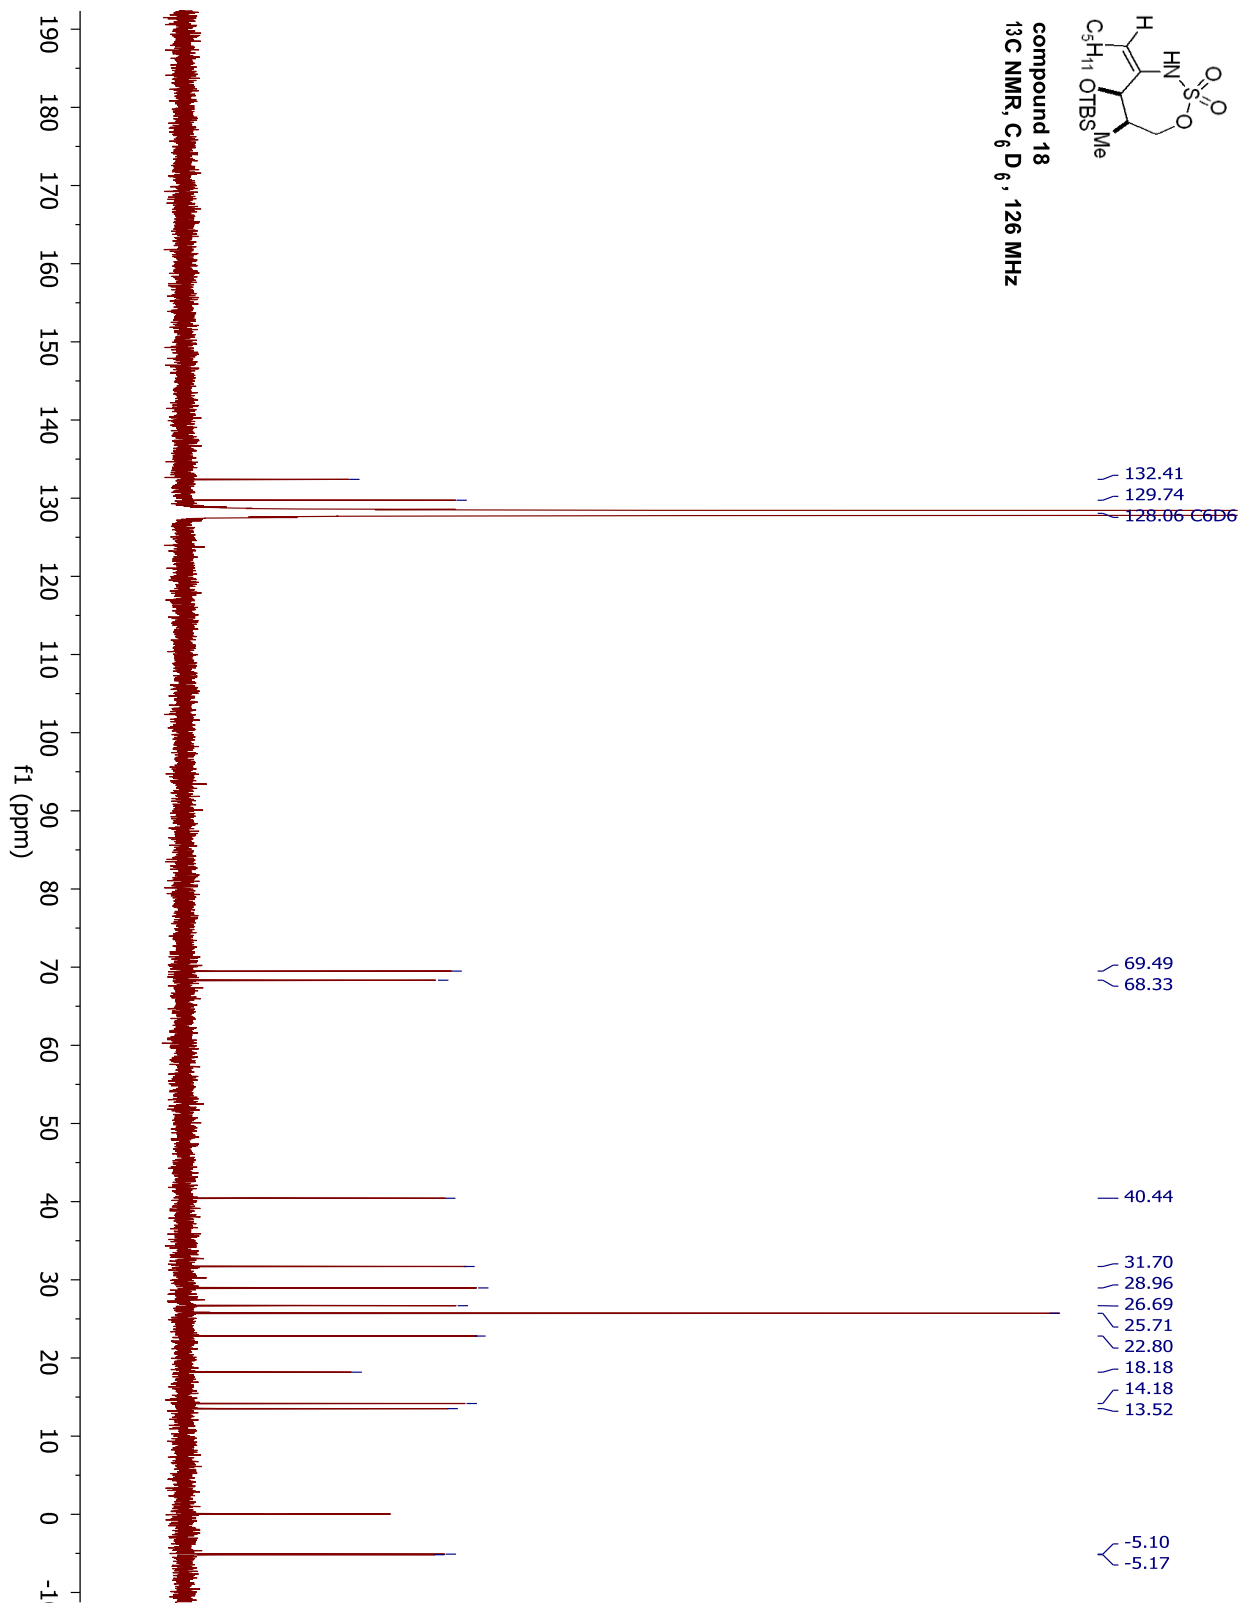

<sup>1</sup>H NMR for compound 20.

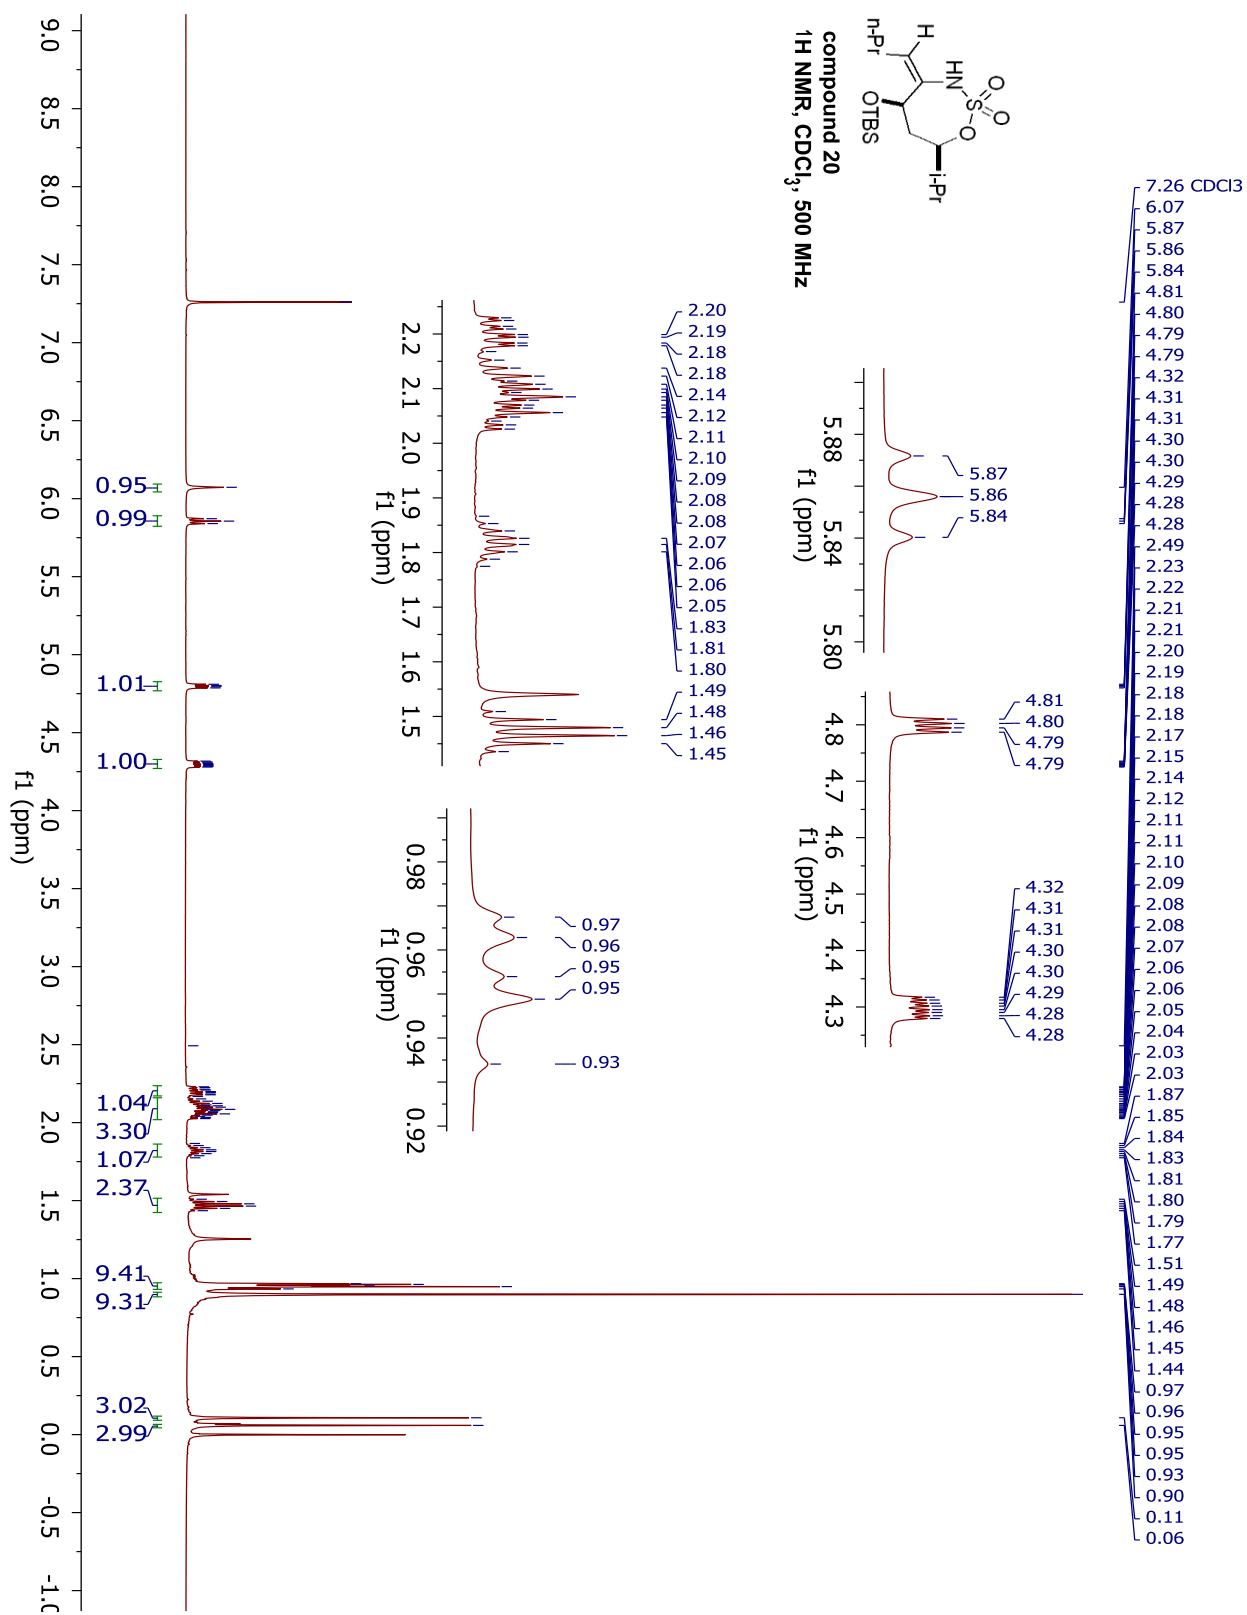

<sup>13</sup>C NMR for compound 20.

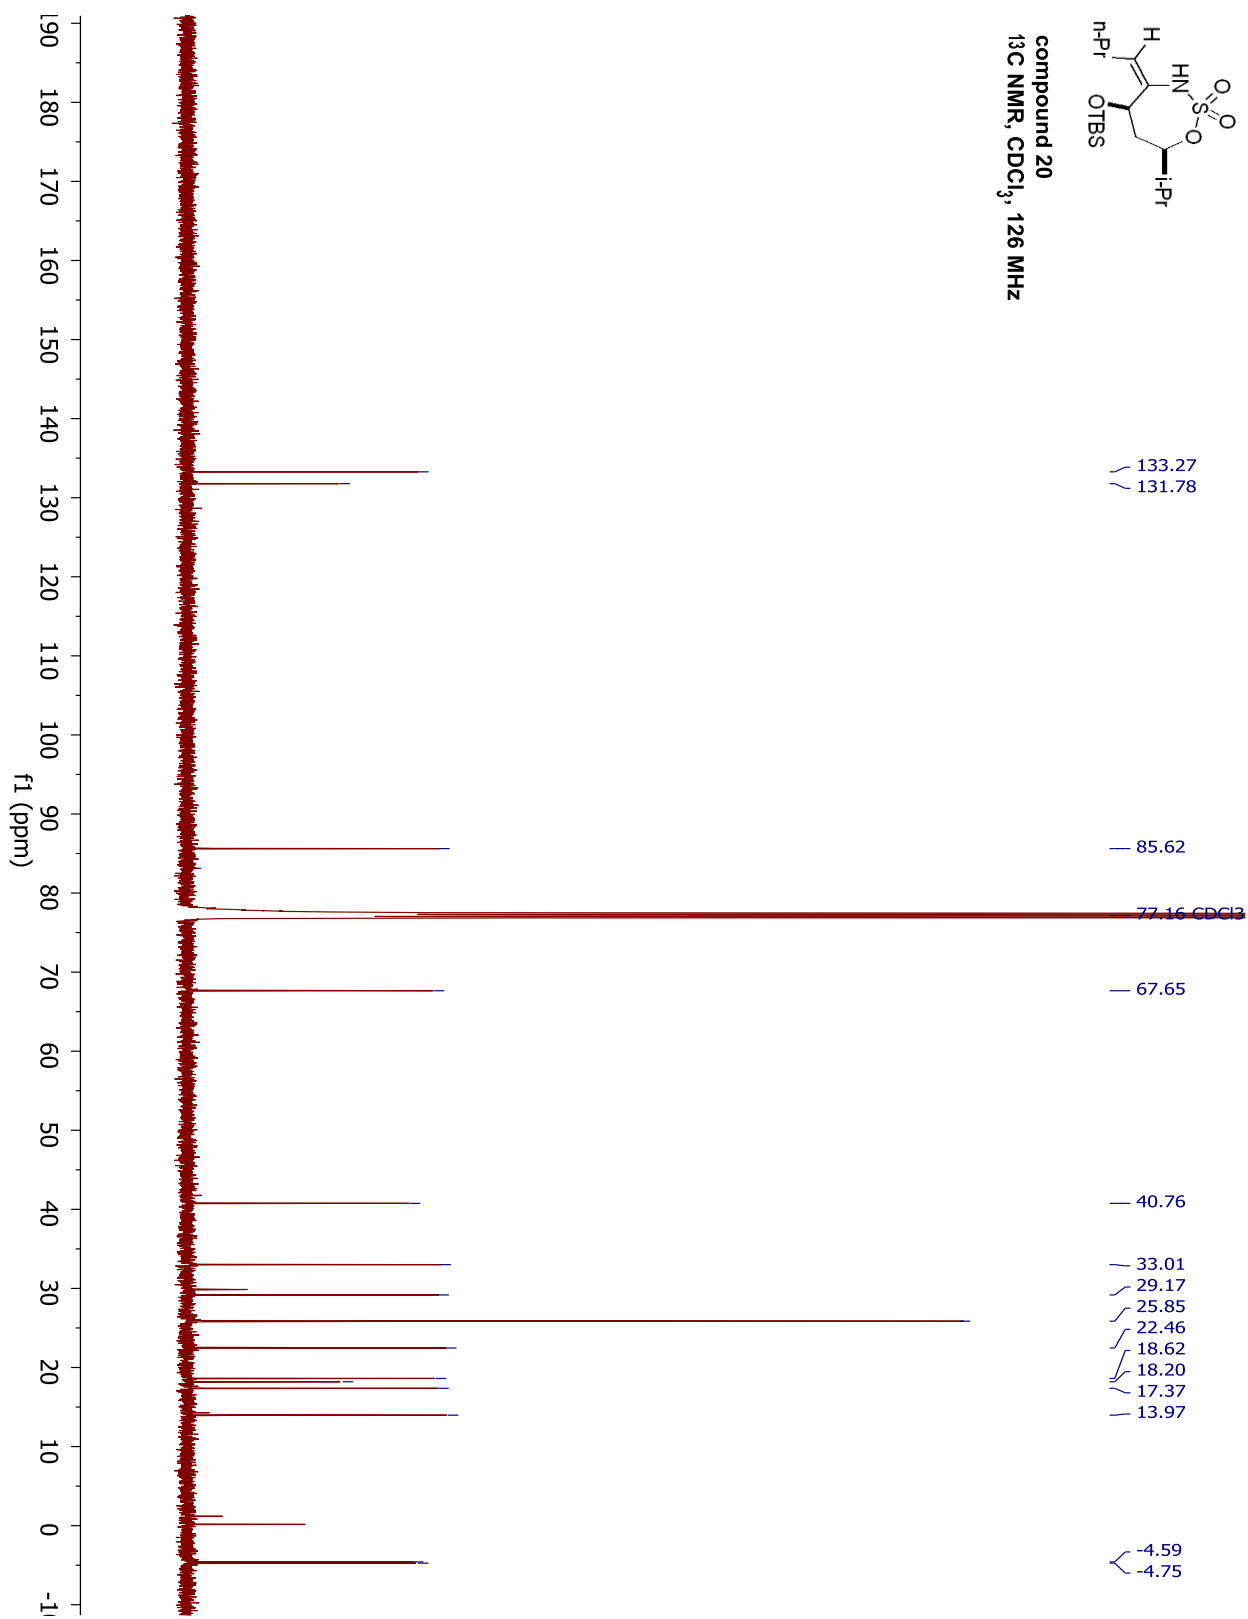



<sup>1</sup>H NMR for compound 7a.

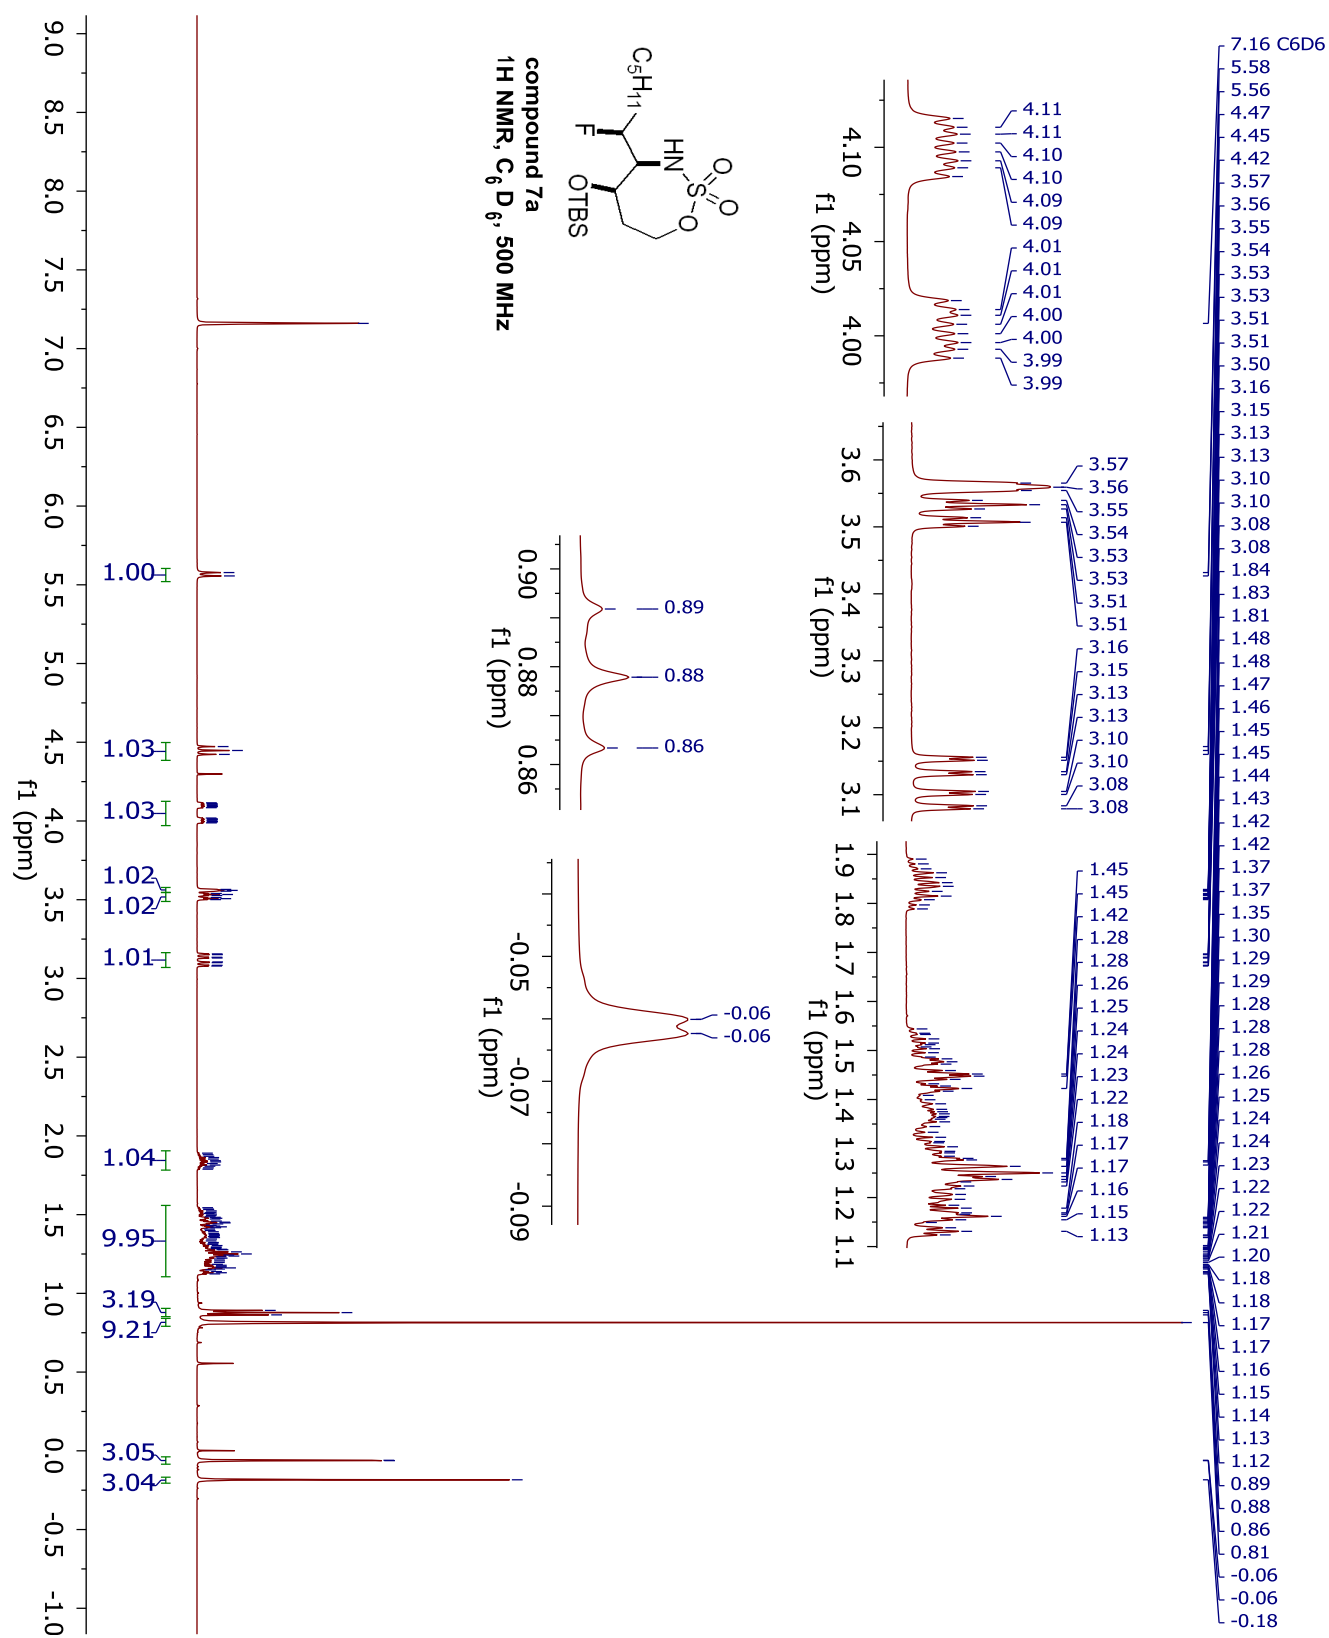

<sup>13</sup>C NMR for compound 7a.

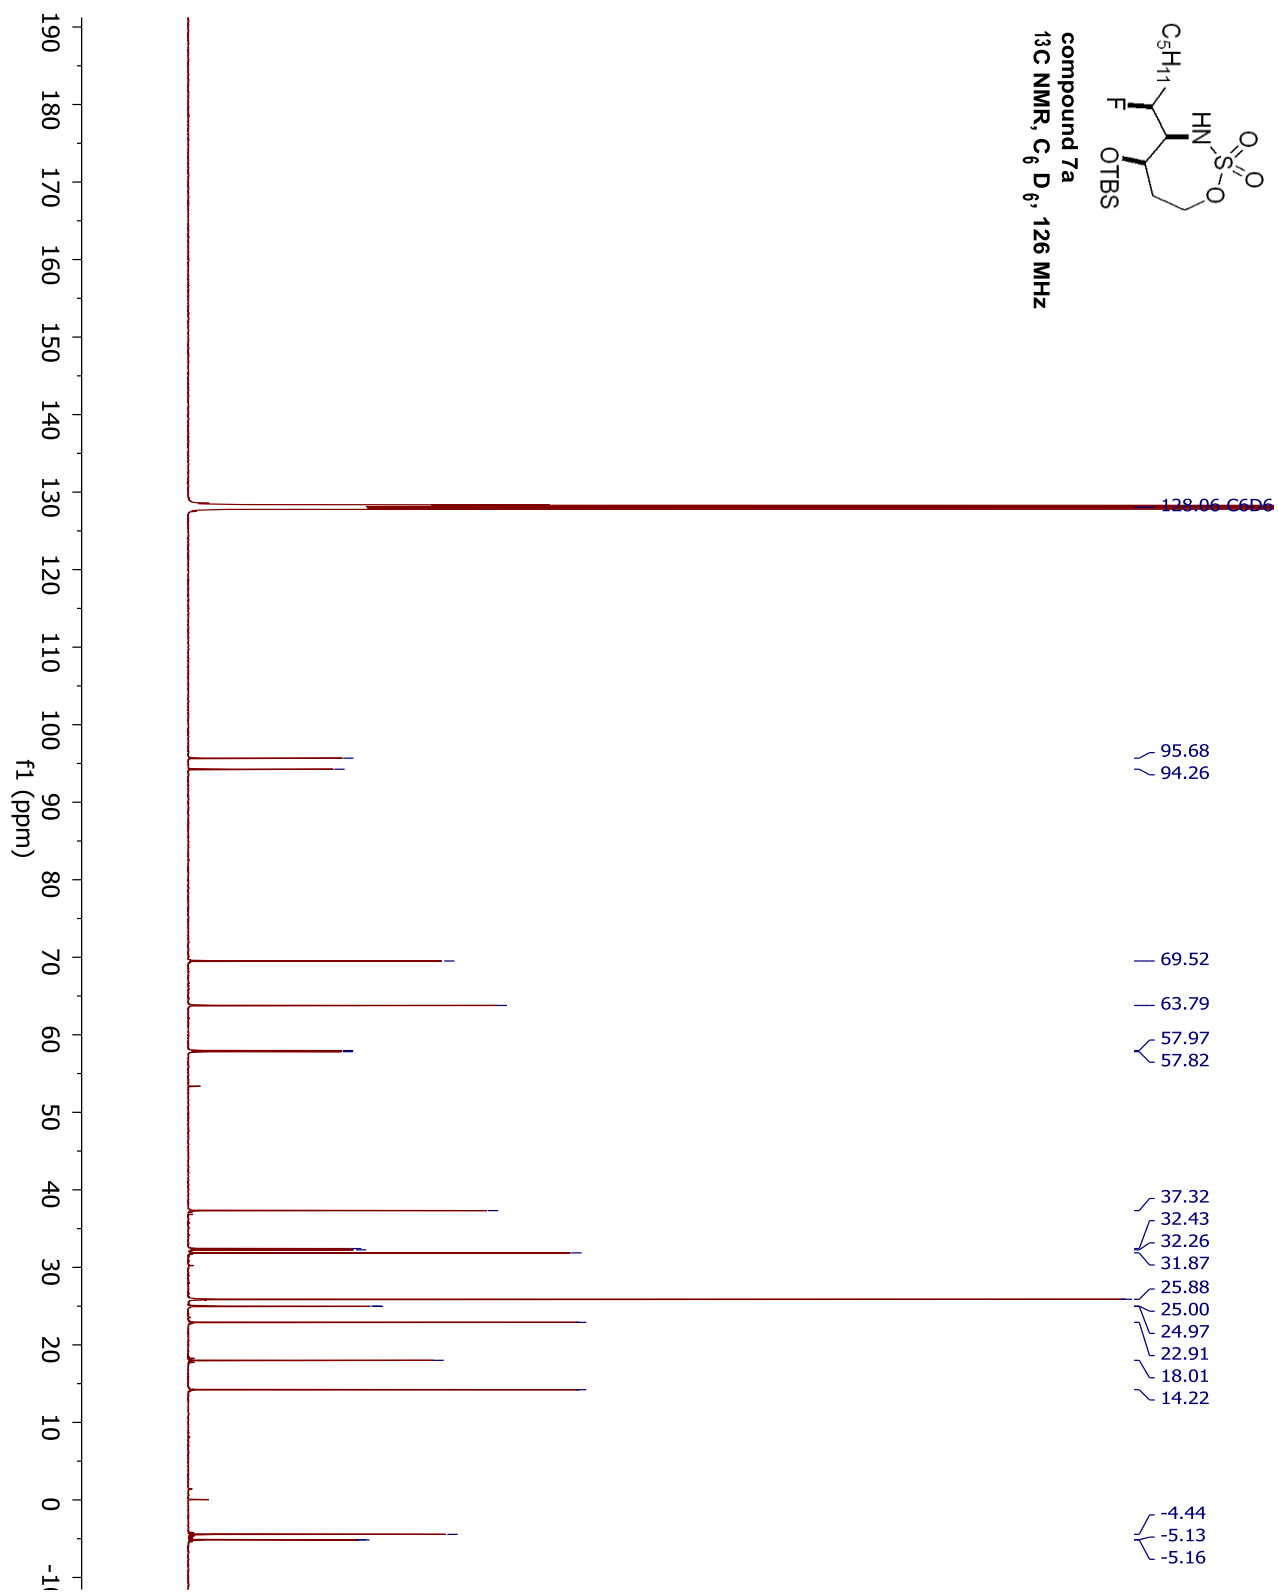

<sup>19</sup>F NMR for compound 7a.

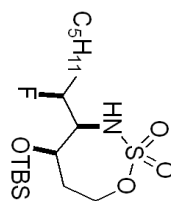

Compound 7a  
<sup>19</sup>F NMR, C<sub>6</sub>D<sub>6</sub>, 471 MHz

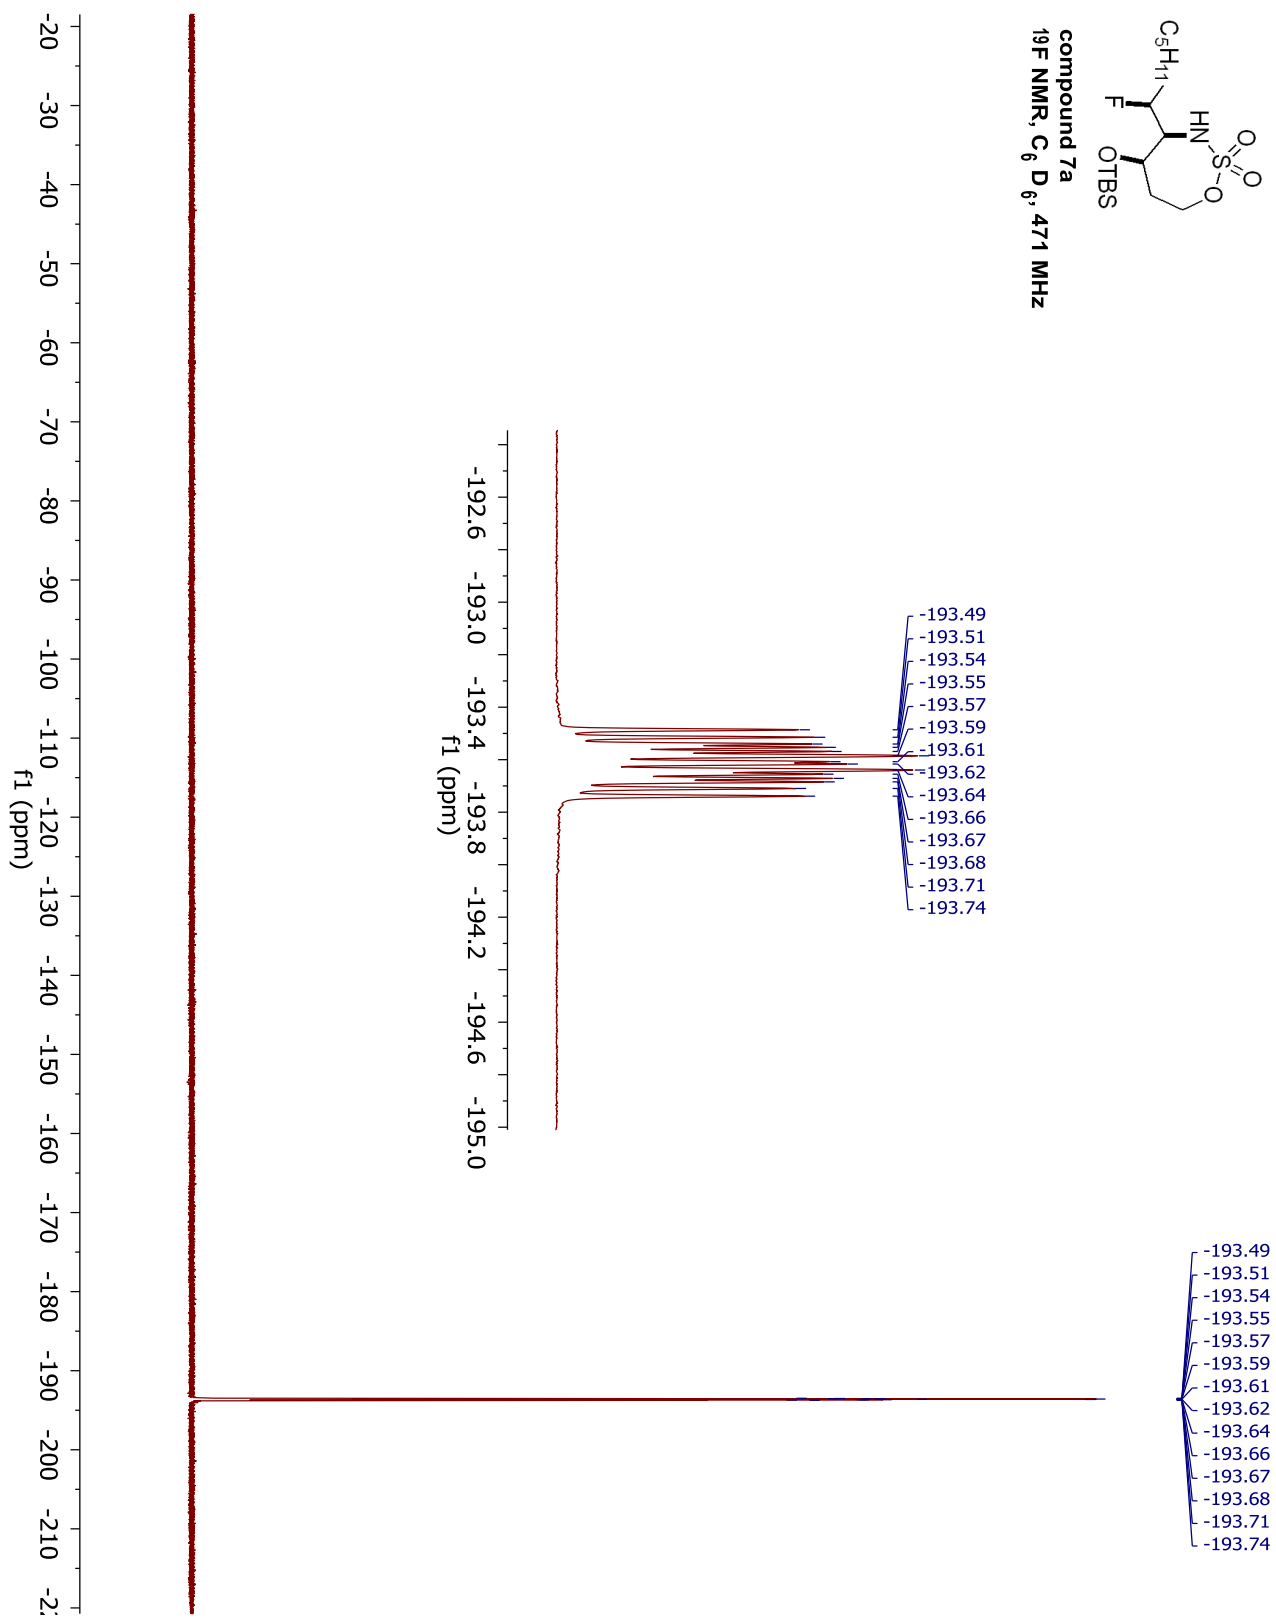

<sup>1</sup>H NMR for compound 8a.

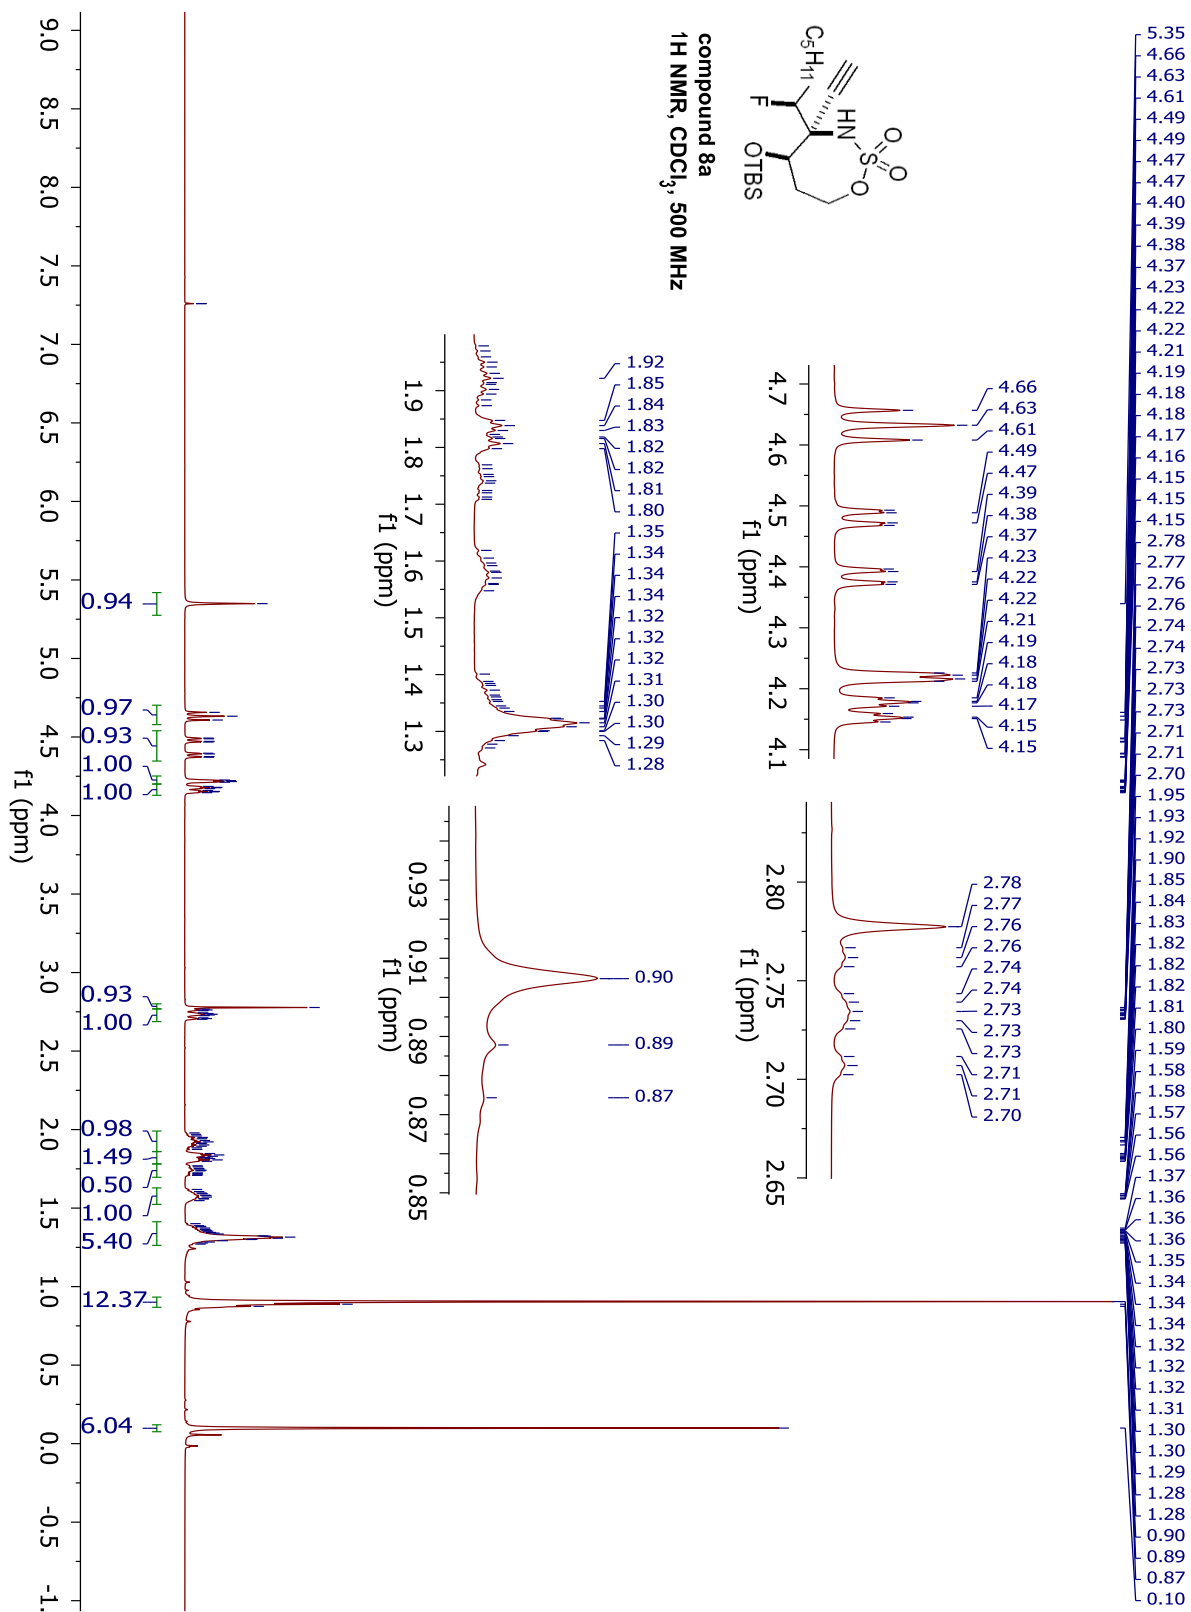

<sup>13</sup>C NMR for compound 8a.

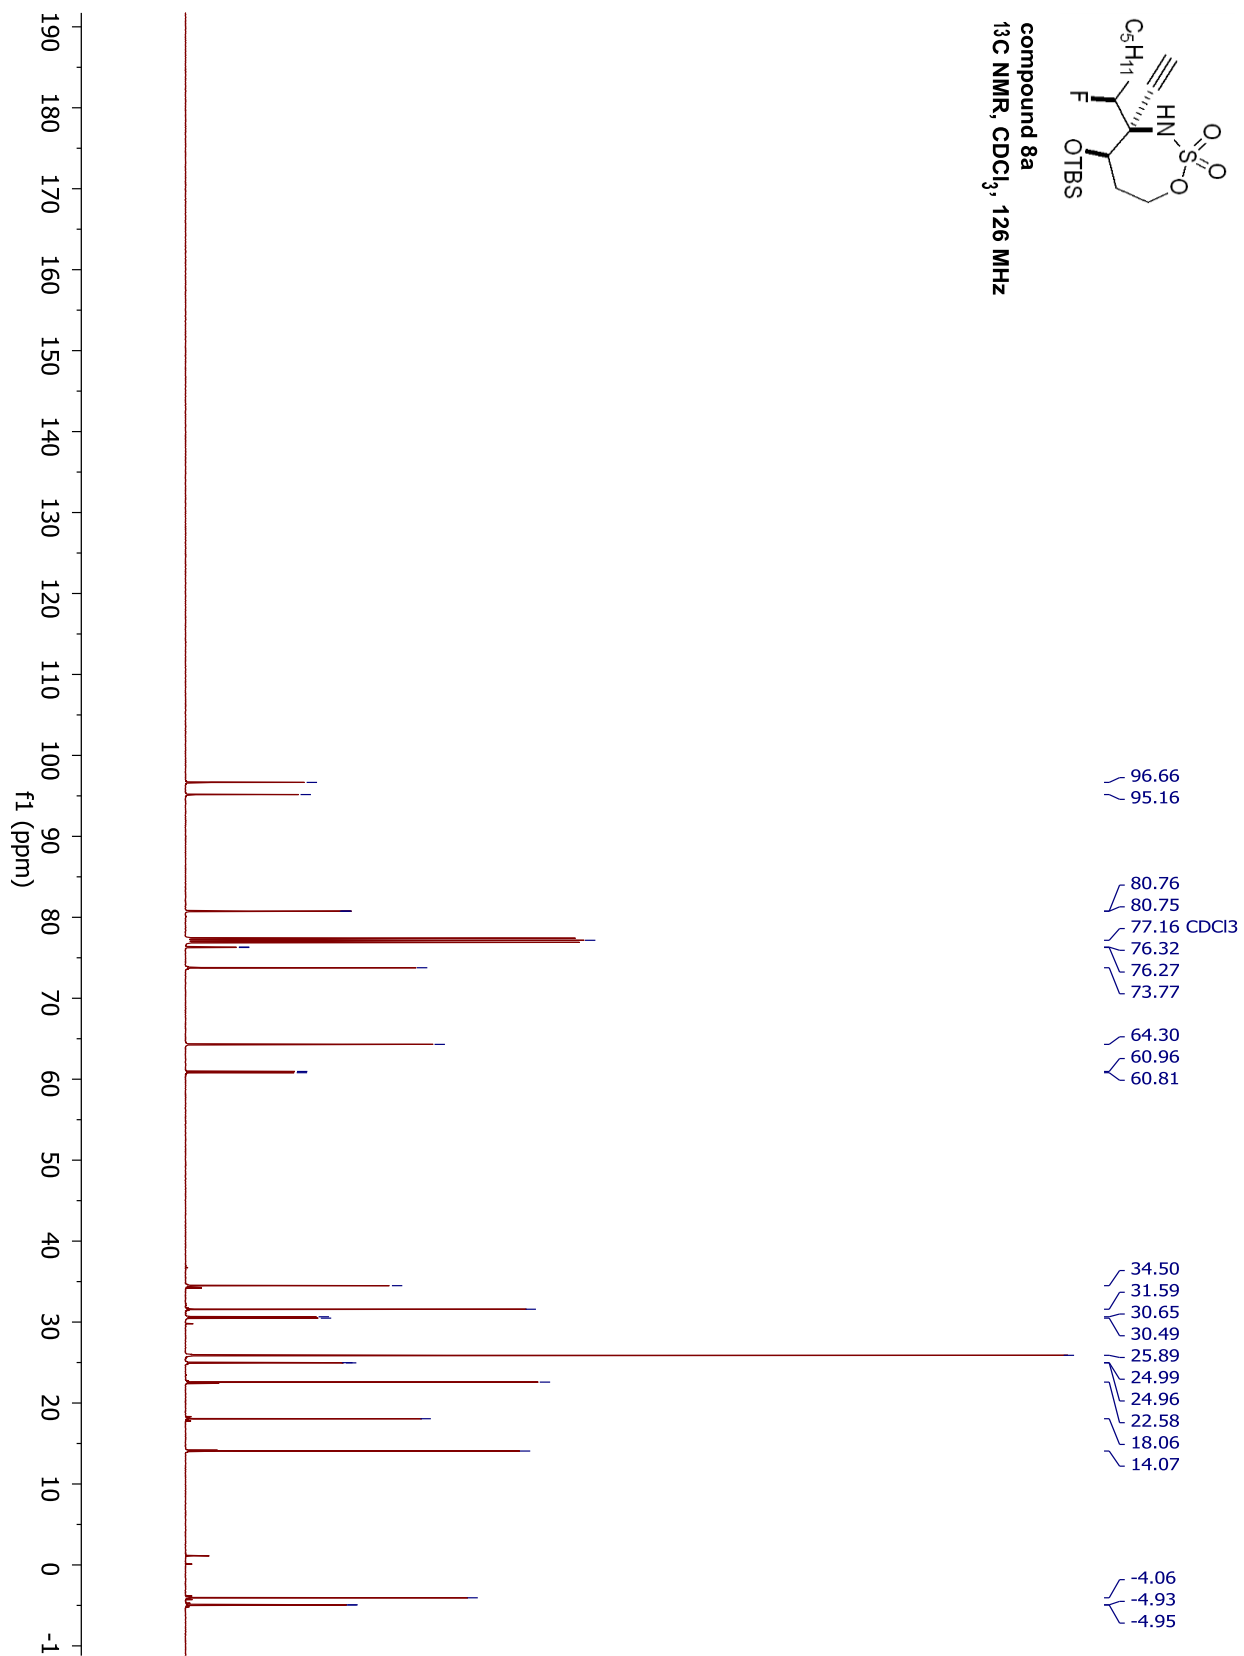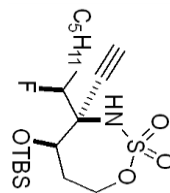

compound 8a  
<sup>13</sup>C NMR, CDCl<sub>3</sub>, 126 MHz

<sup>19</sup>F NMR for compound 8a.

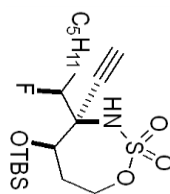

compound 8a  
<sup>19</sup>F NMR, CDCl<sub>3</sub>, 471 MHz

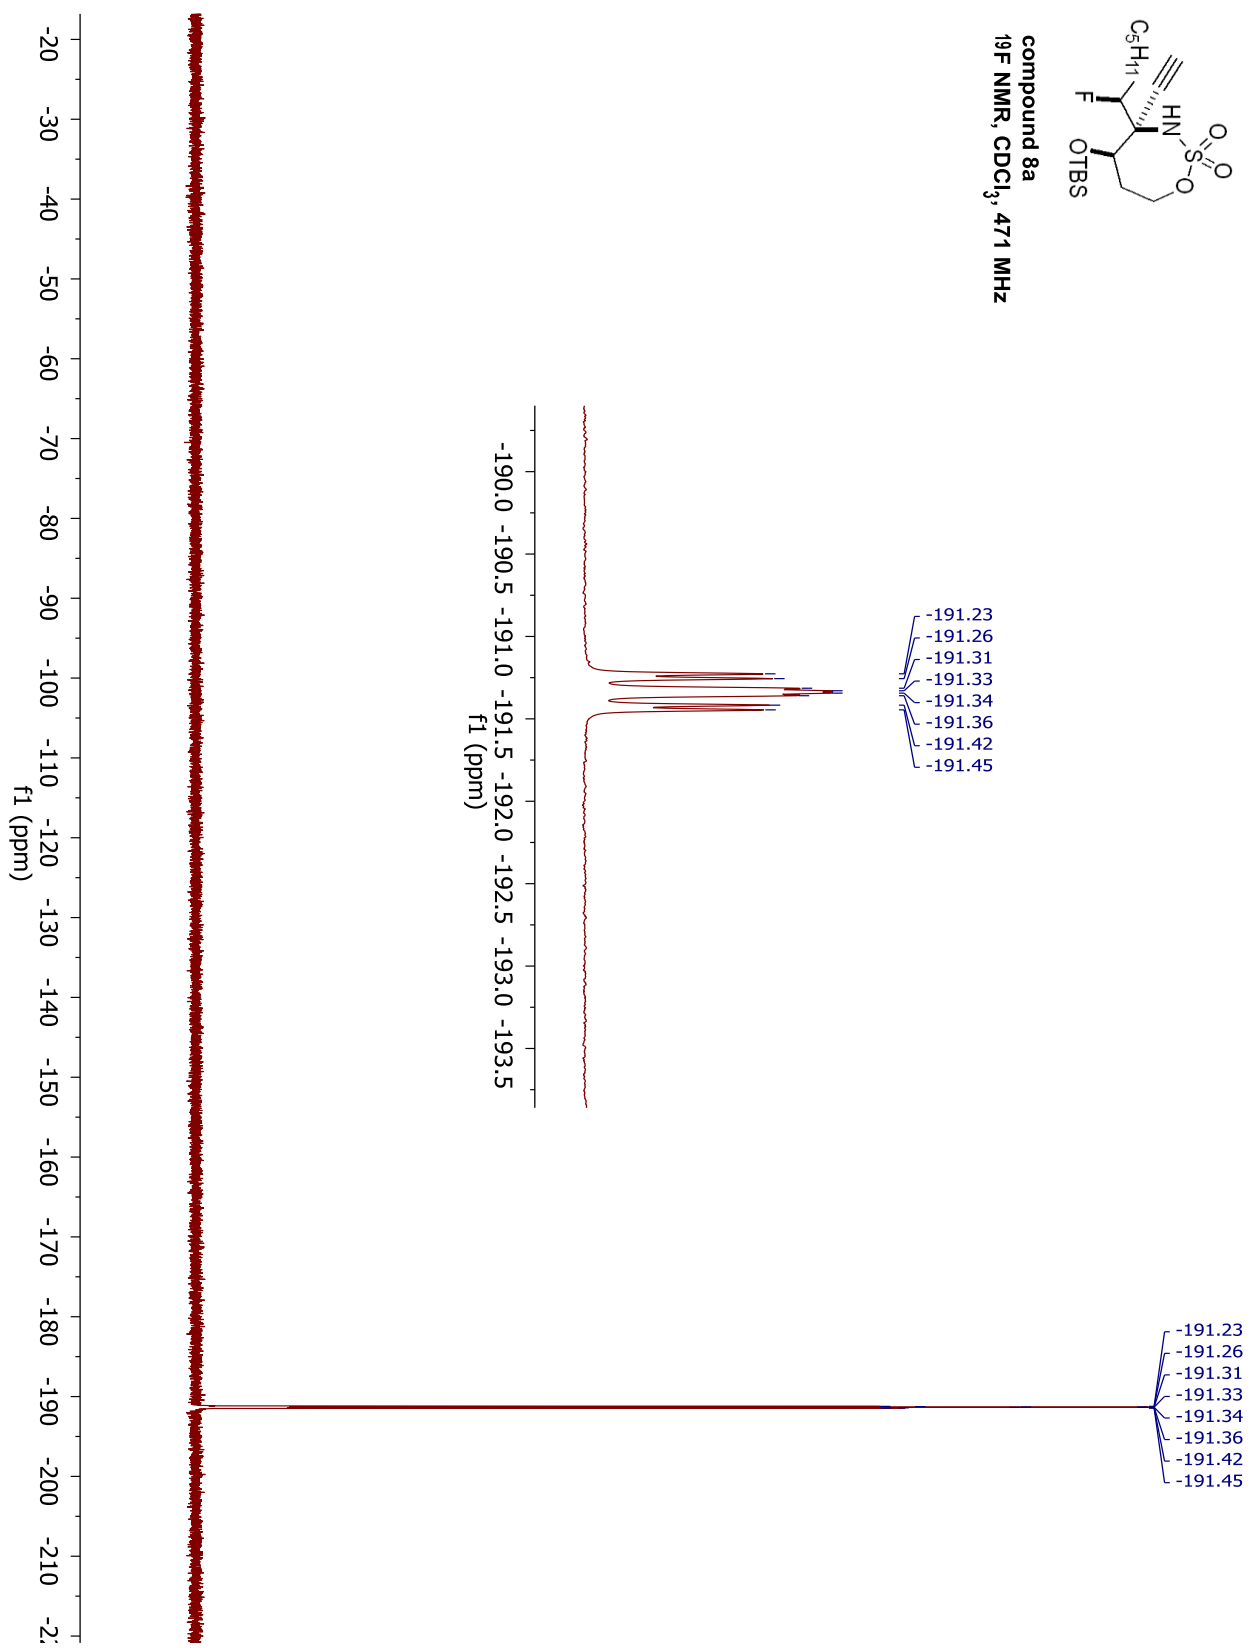

<sup>1</sup>H NMR for compound 9a.

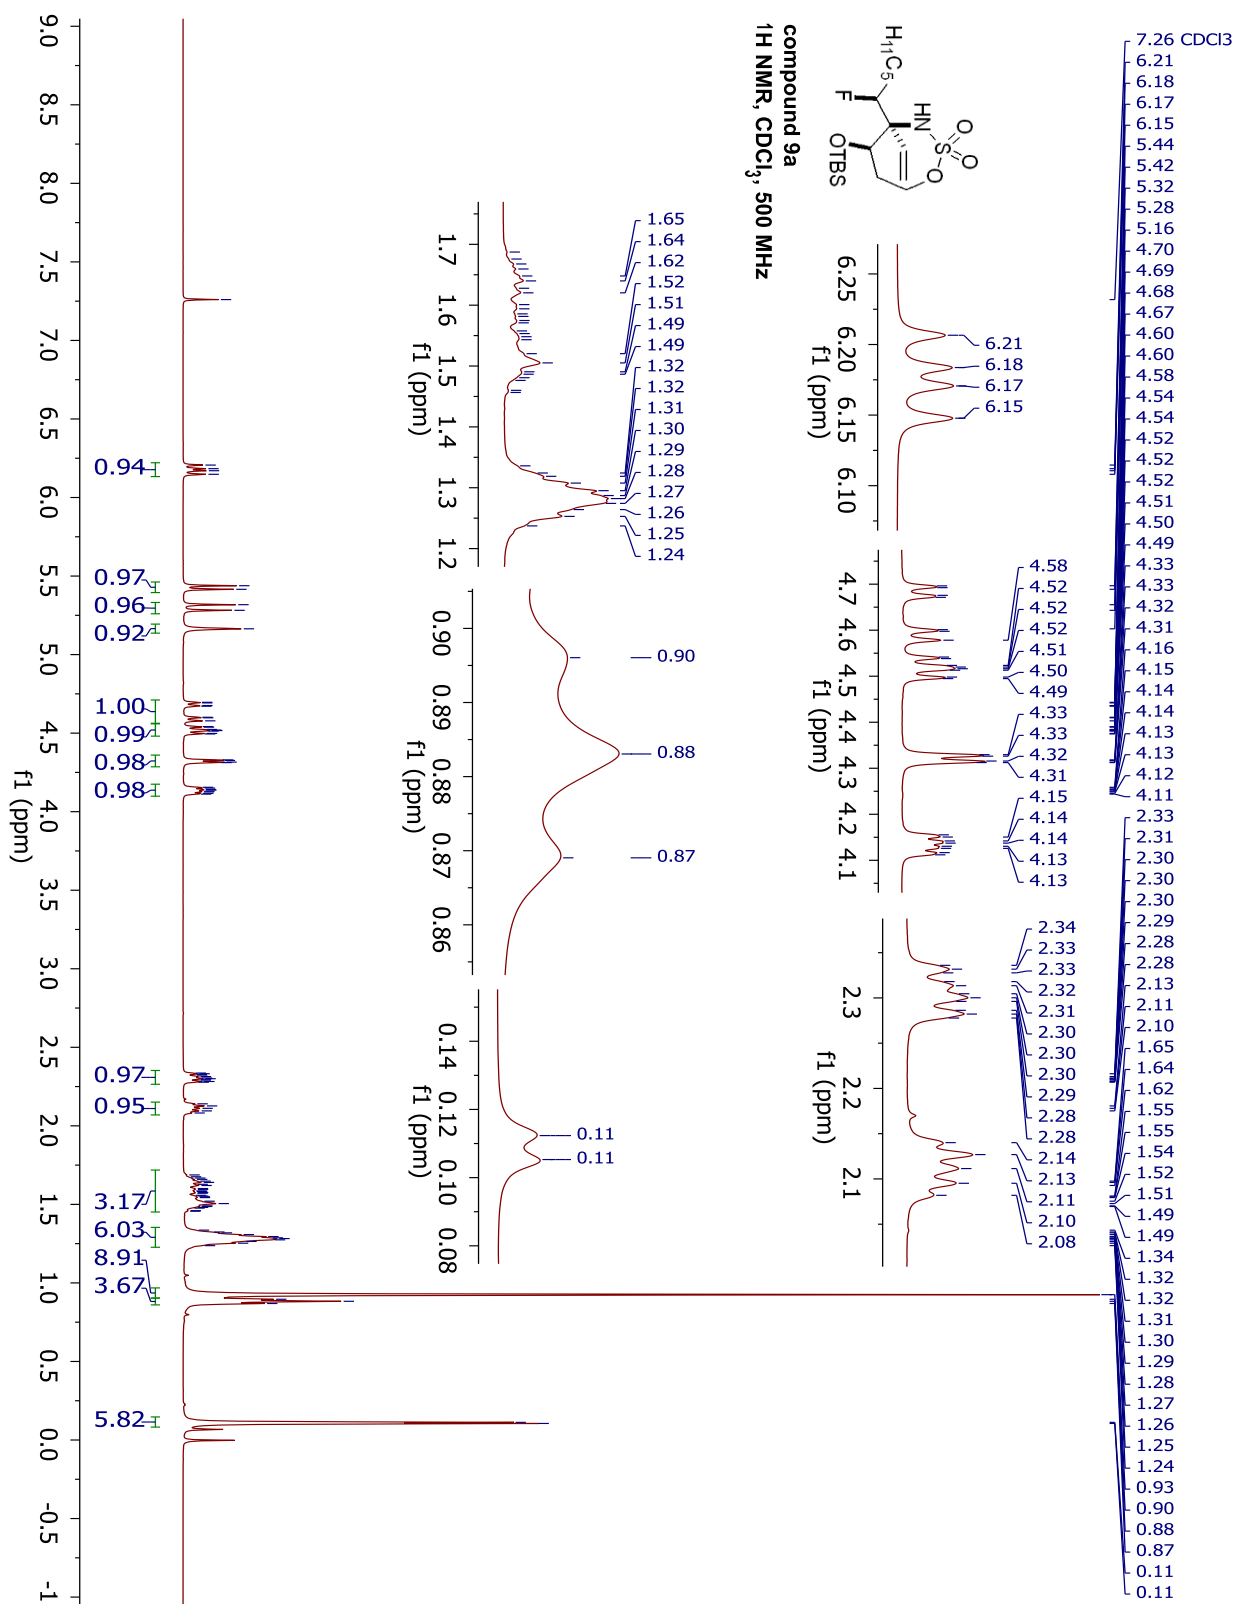

<sup>13</sup>C NMR for compound 9a.

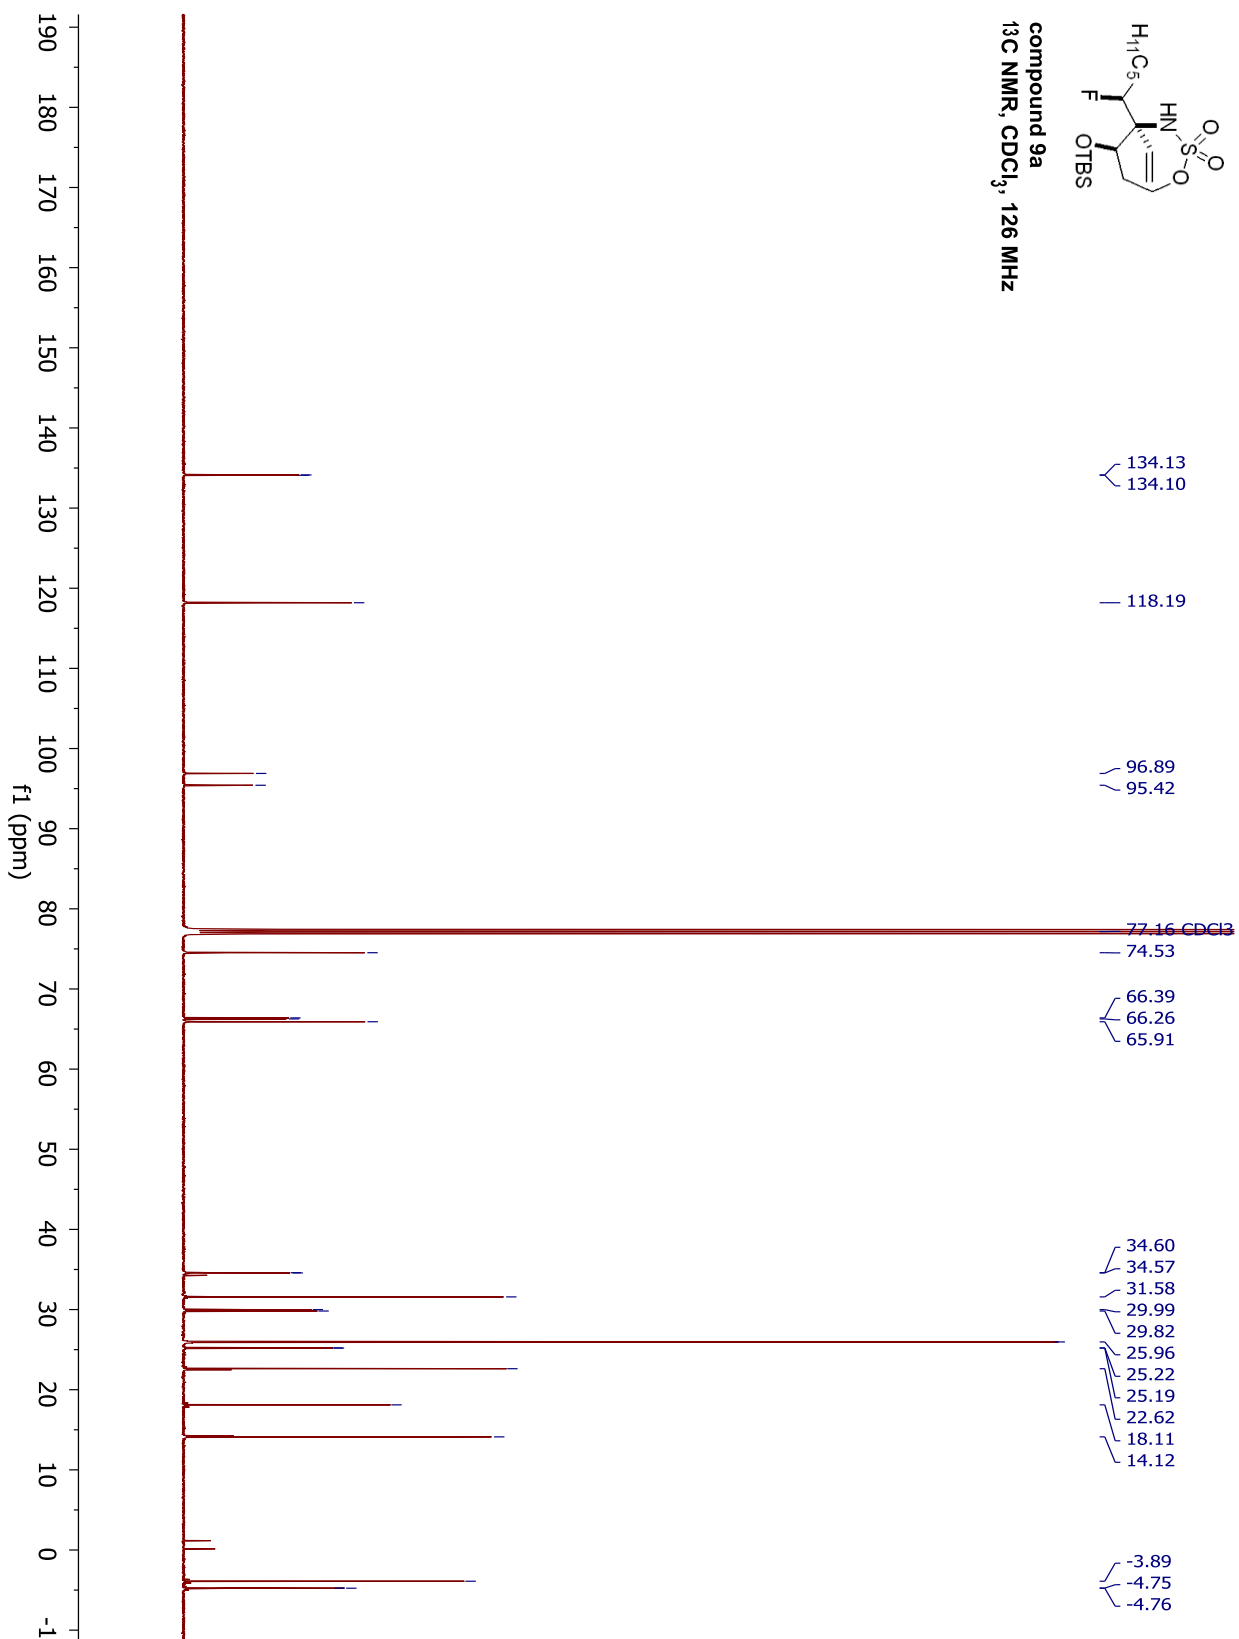



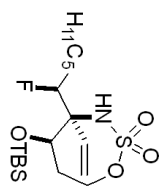

compound 9a  
19F NMR, CDCl<sub>3</sub>, 471 MHz

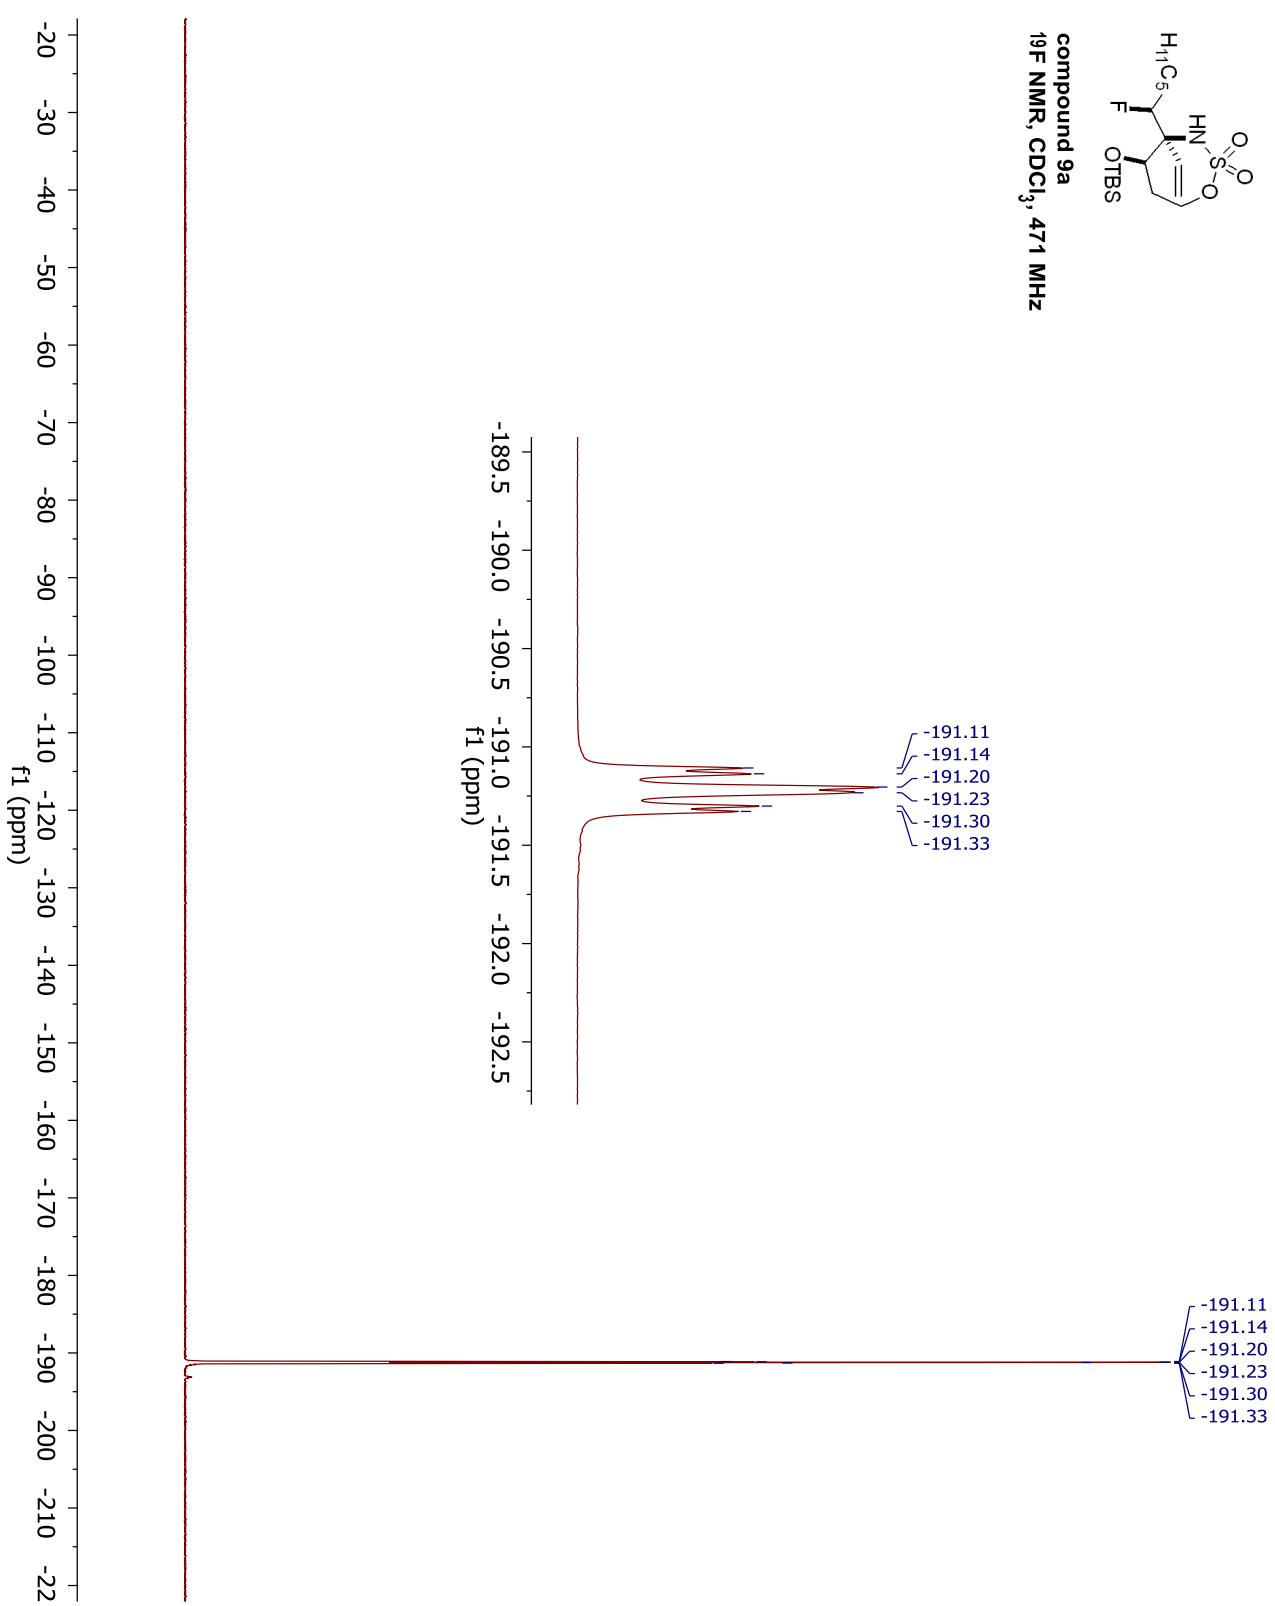

# $^1\text{H NMR}$ for compound 10a.

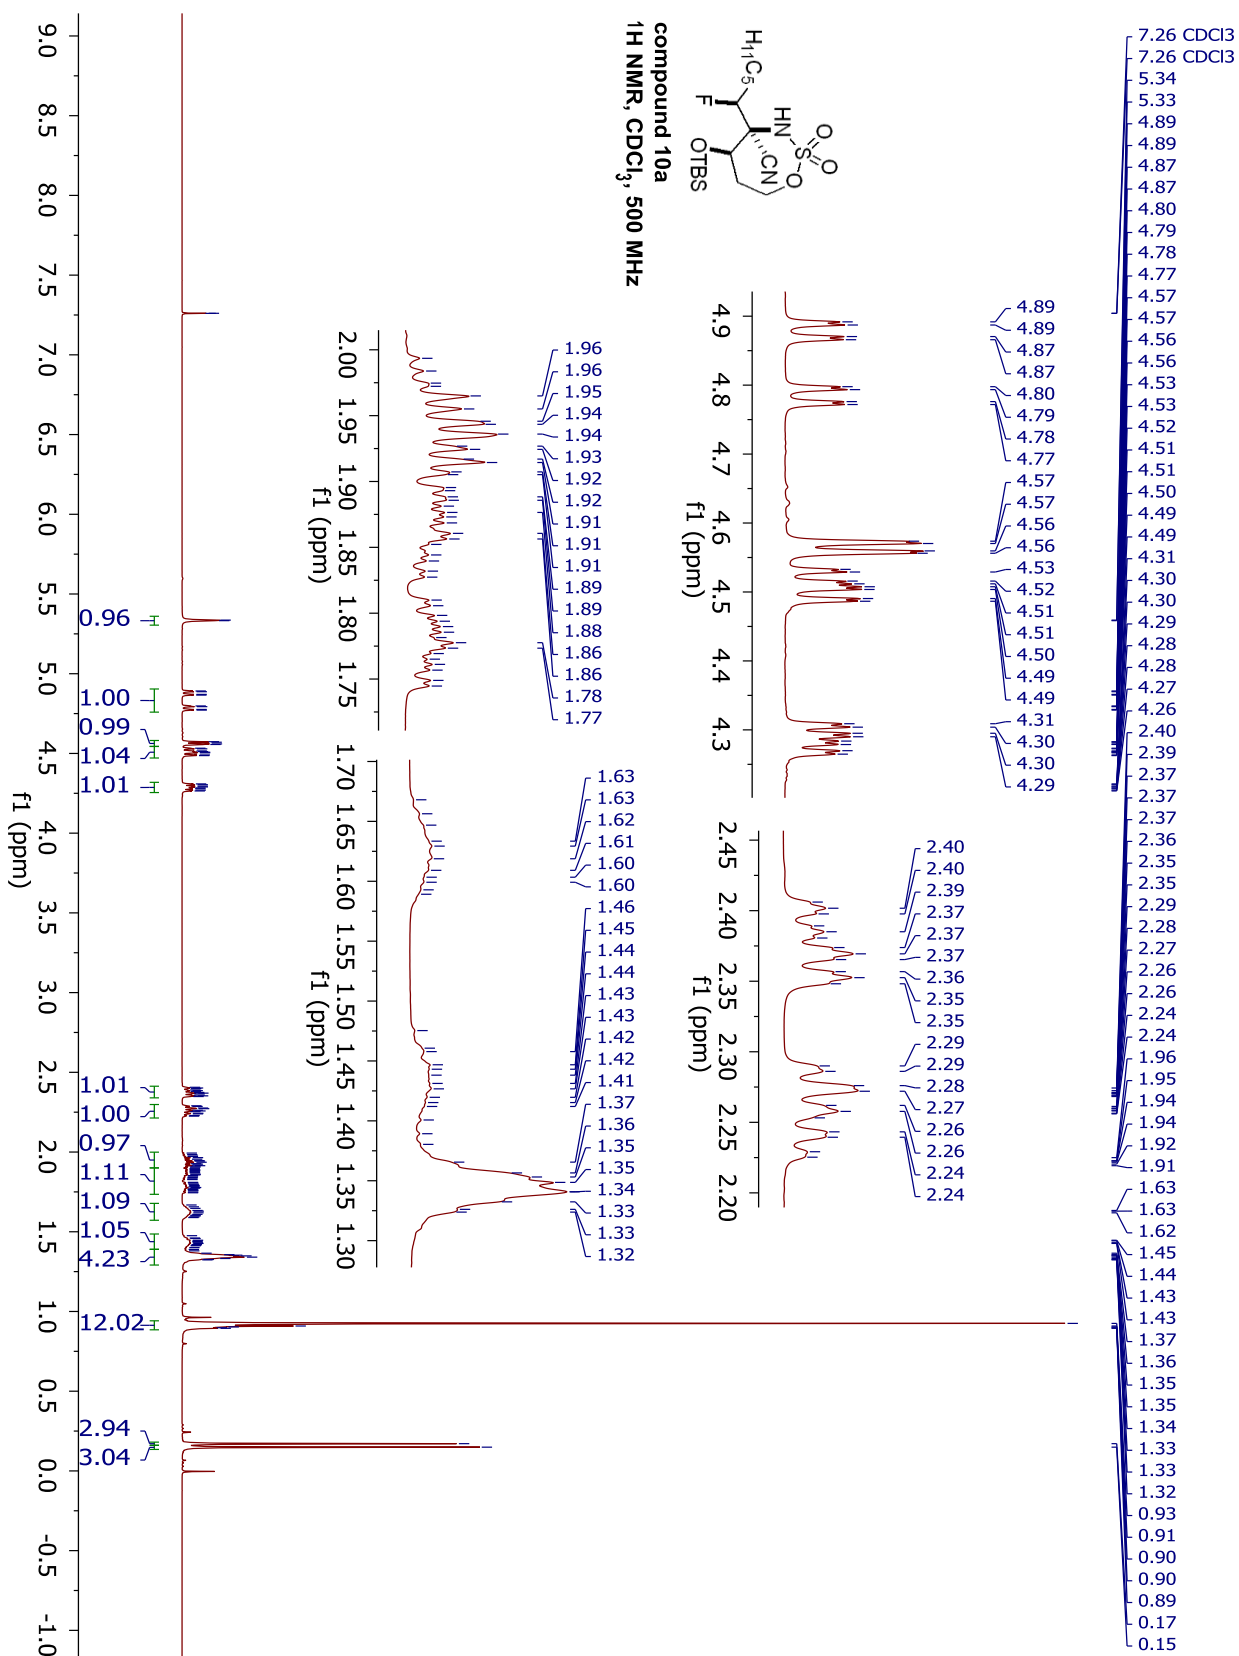

<sup>13</sup>C NMR for compound 10a.

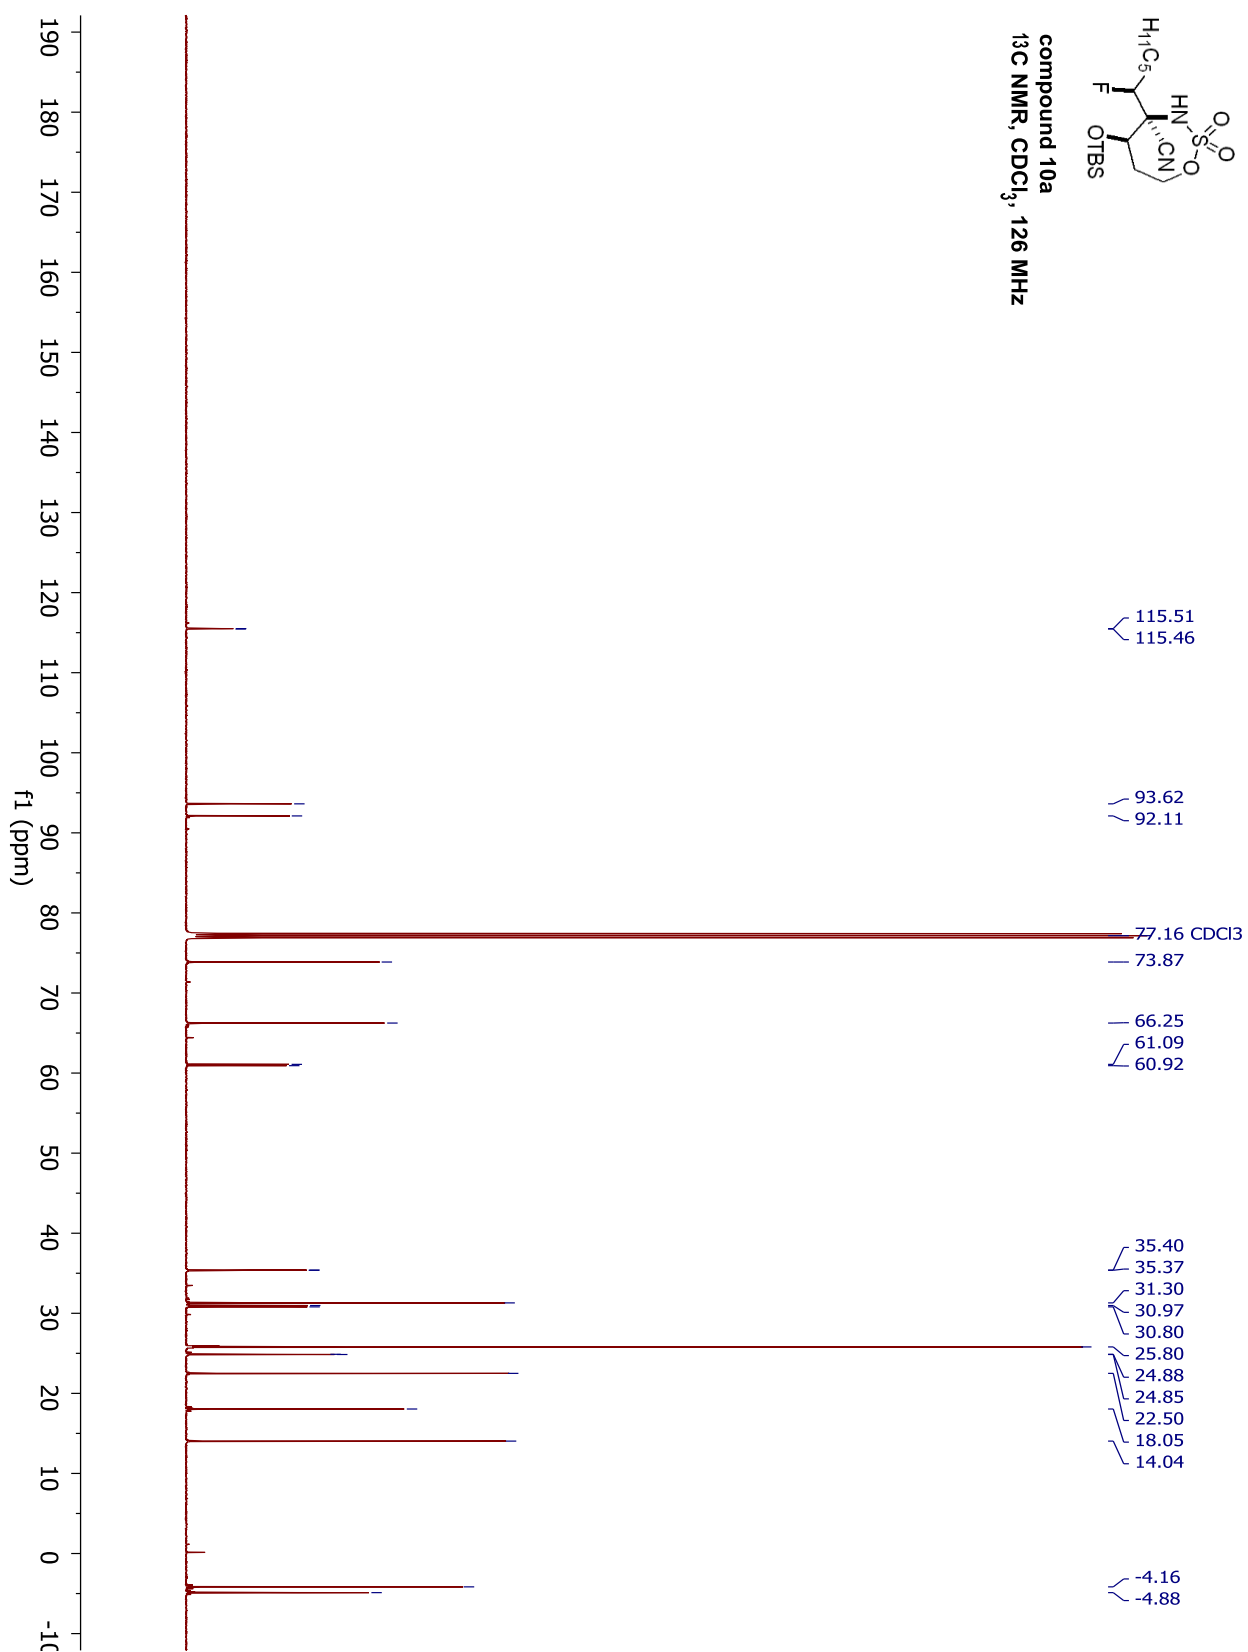

**<sup>19</sup>F NMR for compound 10a.**

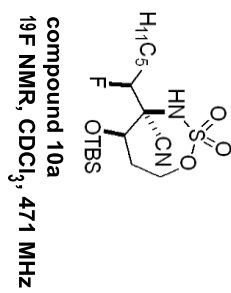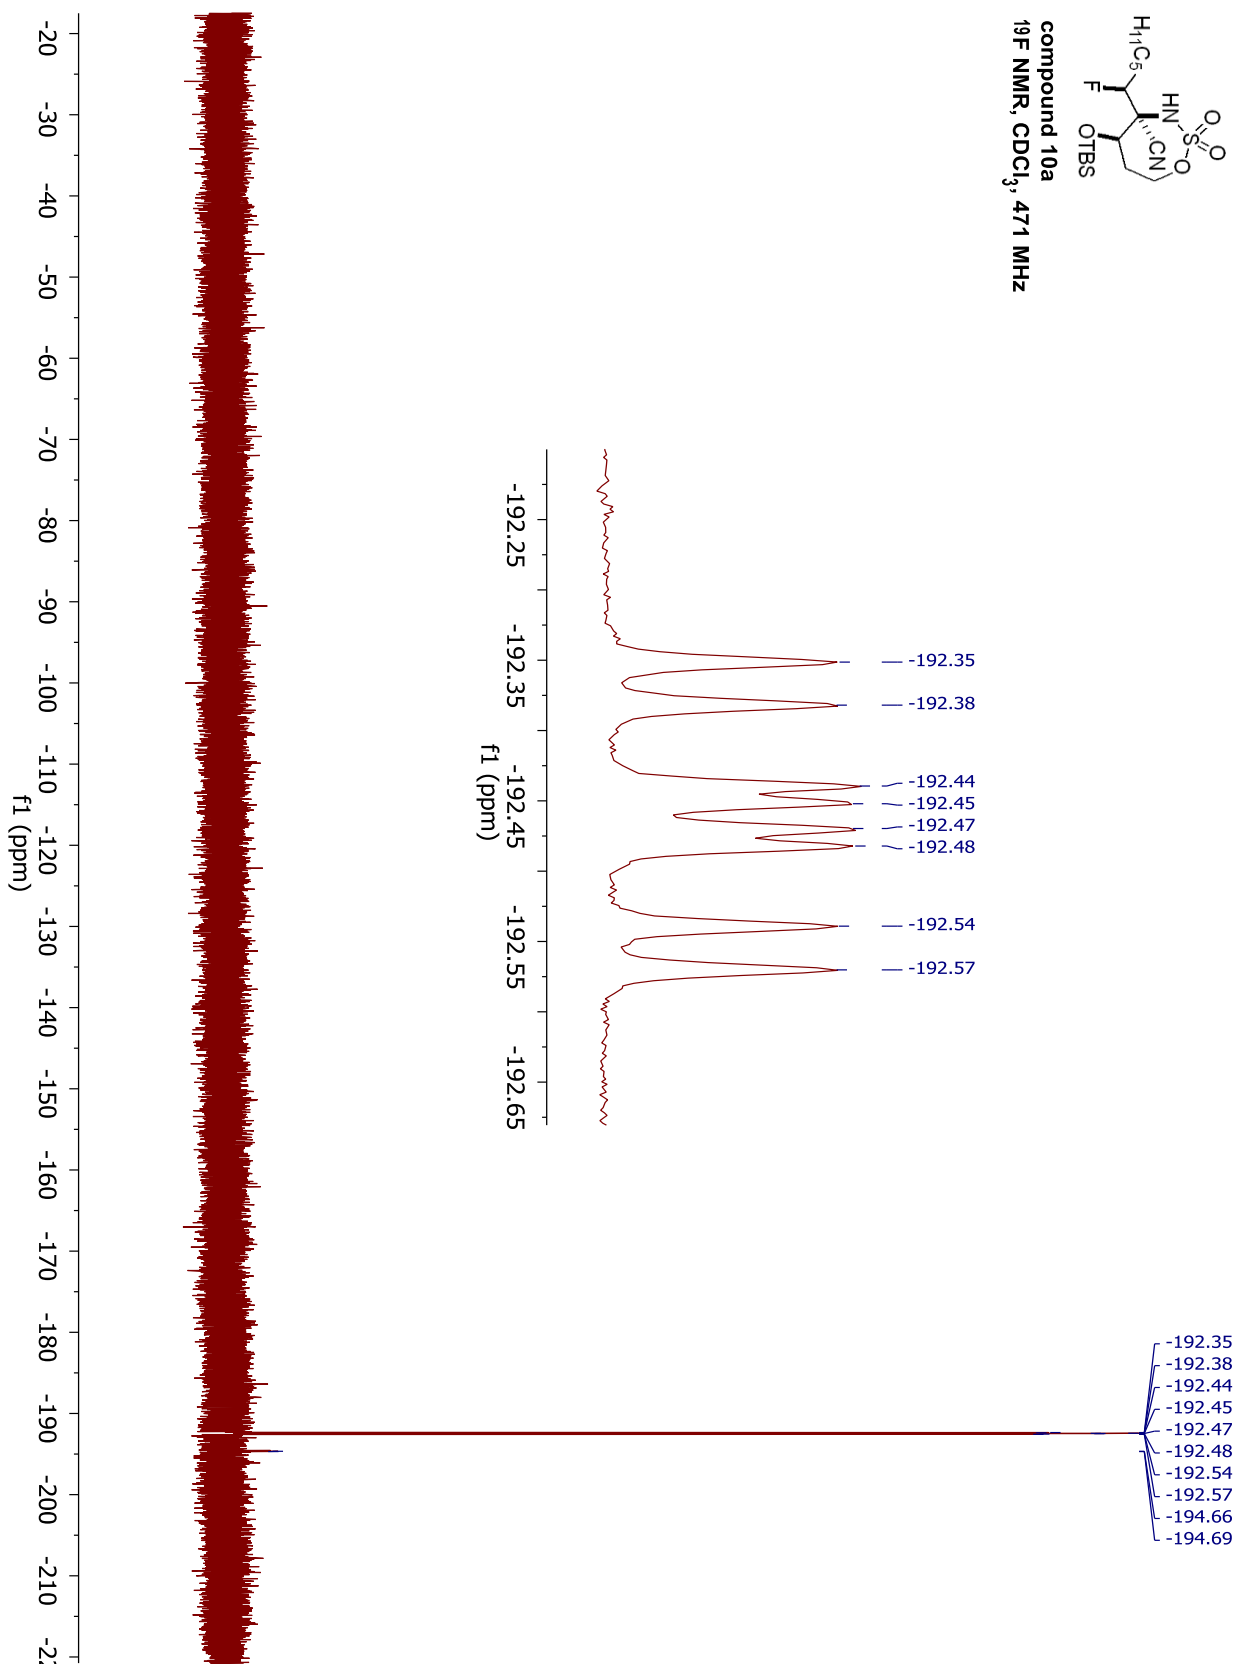

**<sup>1</sup>H NMR for compound 11a.**

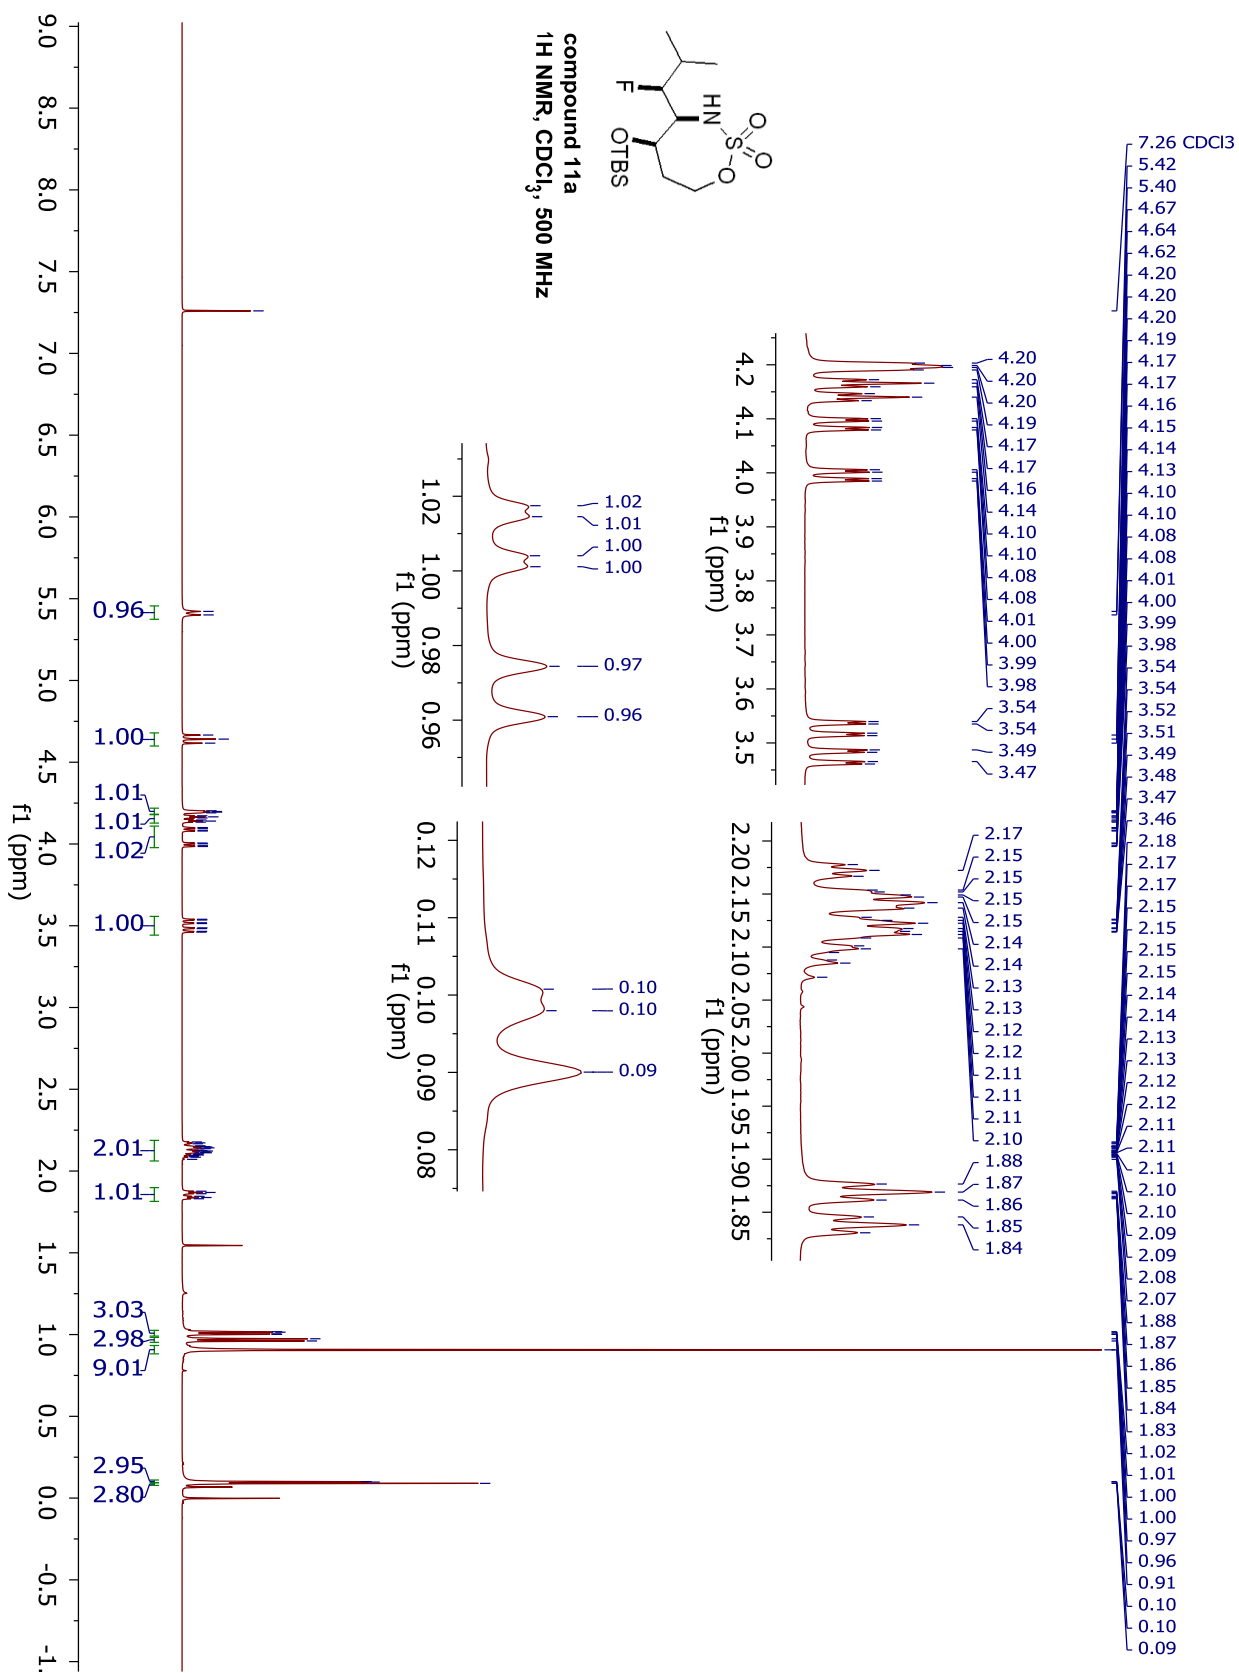

<sup>13</sup>C NMR for compound 11a.

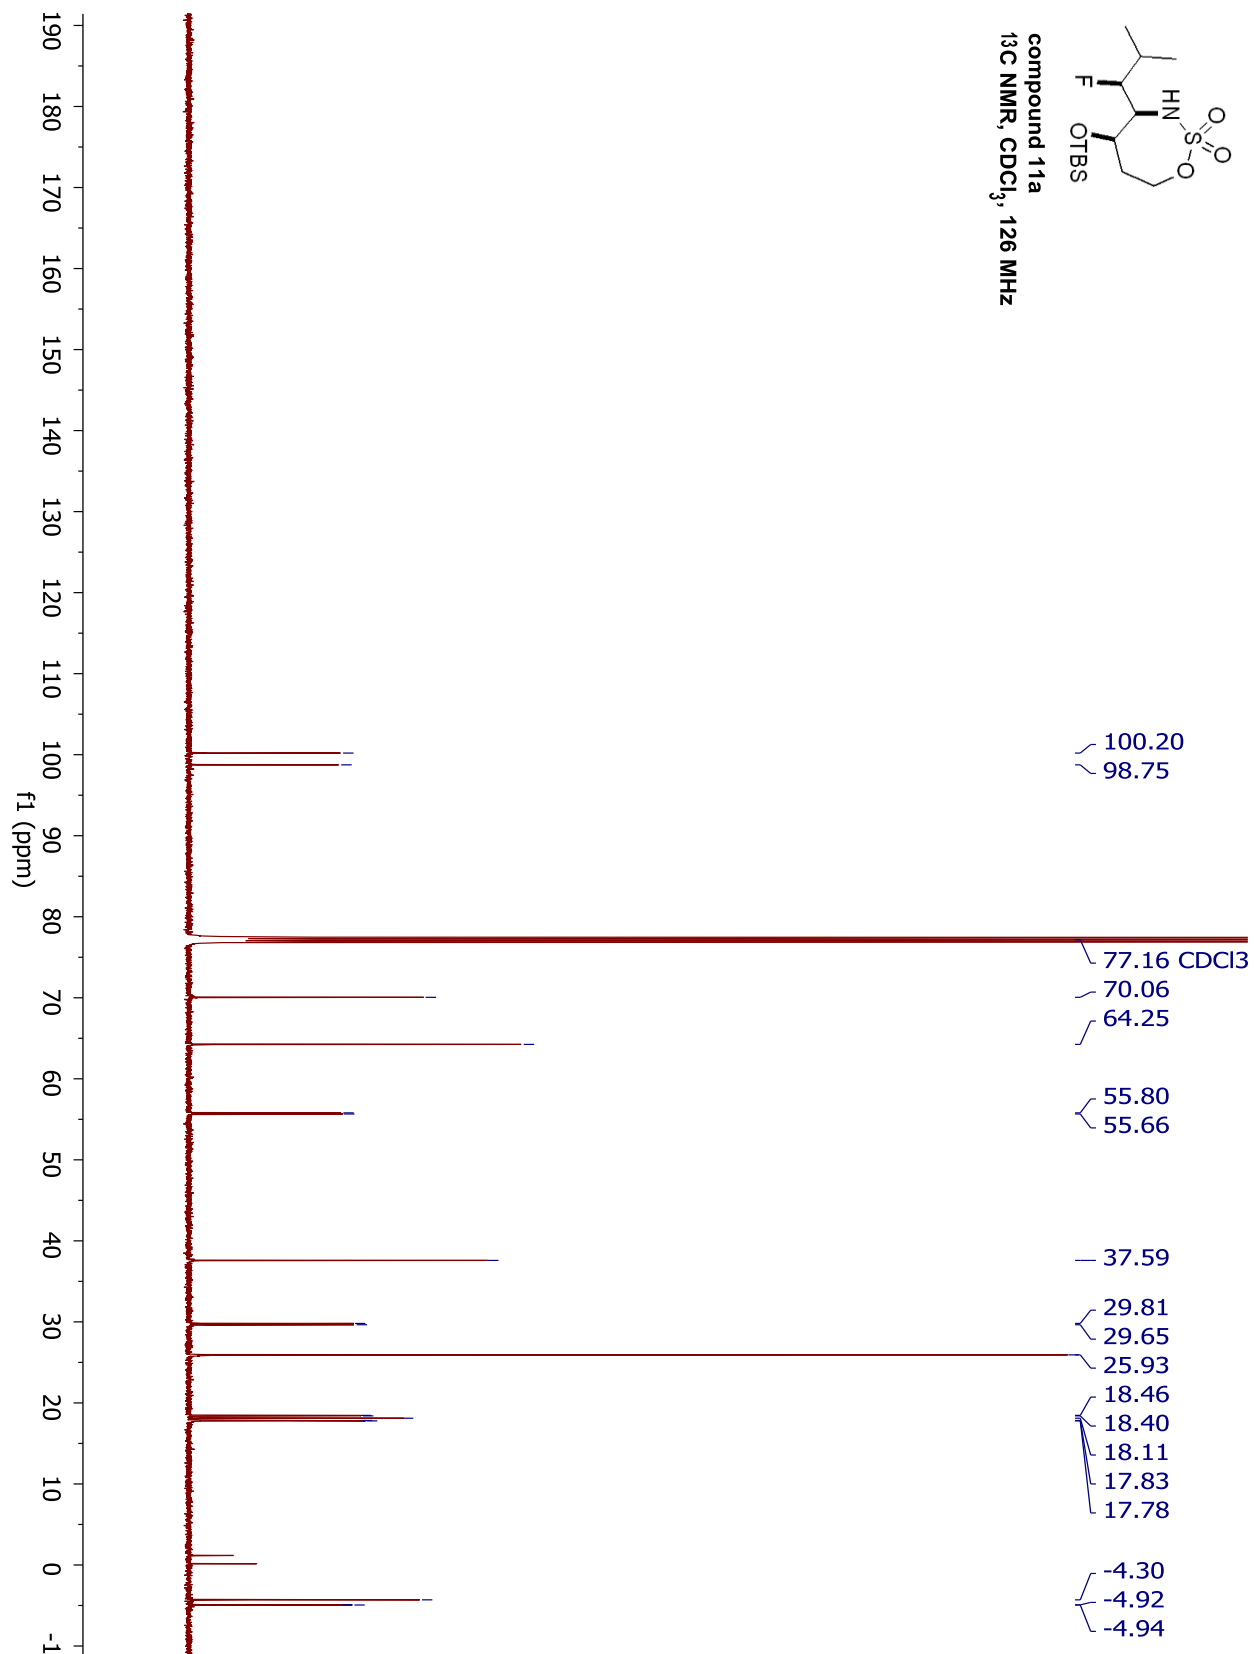

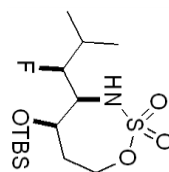

compound 11a  
 $^{19}\text{F}$  NMR,  $\text{CDCl}_3$ , 471 MHz

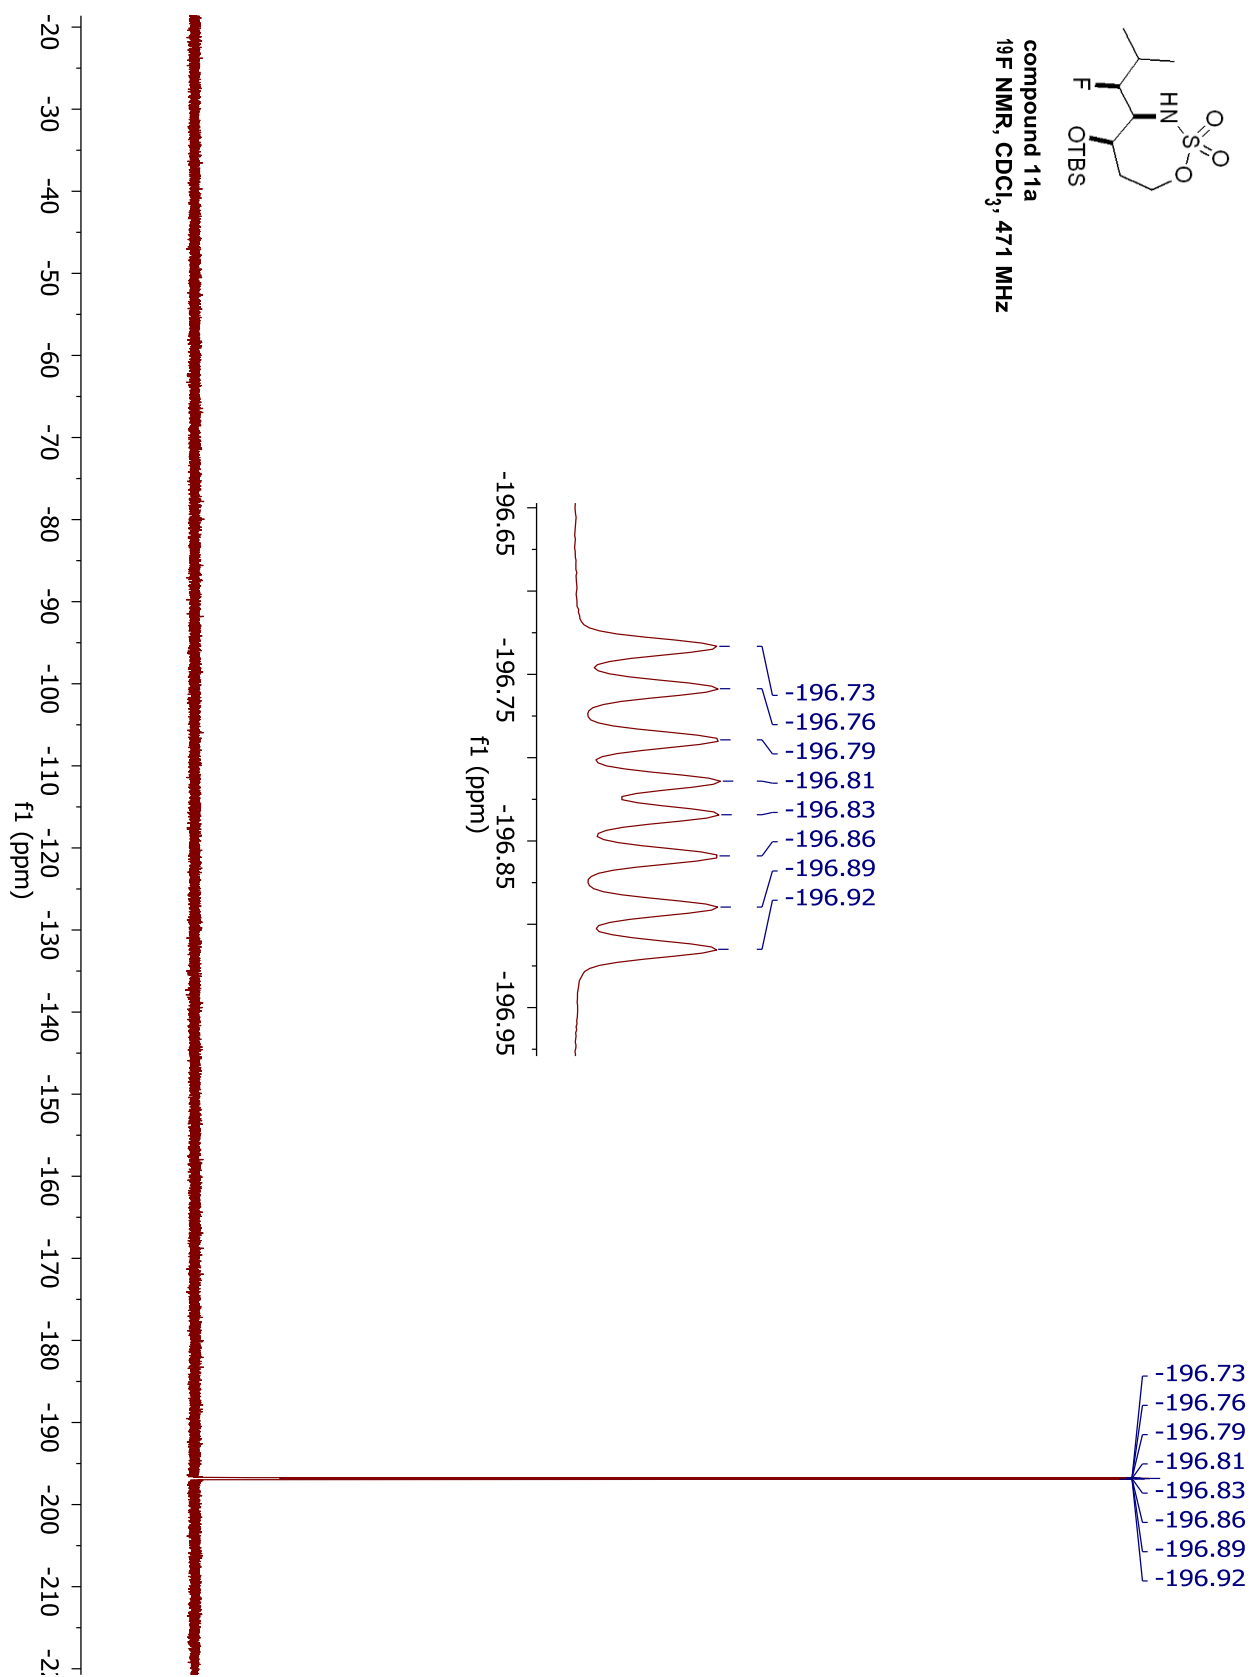

<sup>1</sup>H NMR for compound 12a.

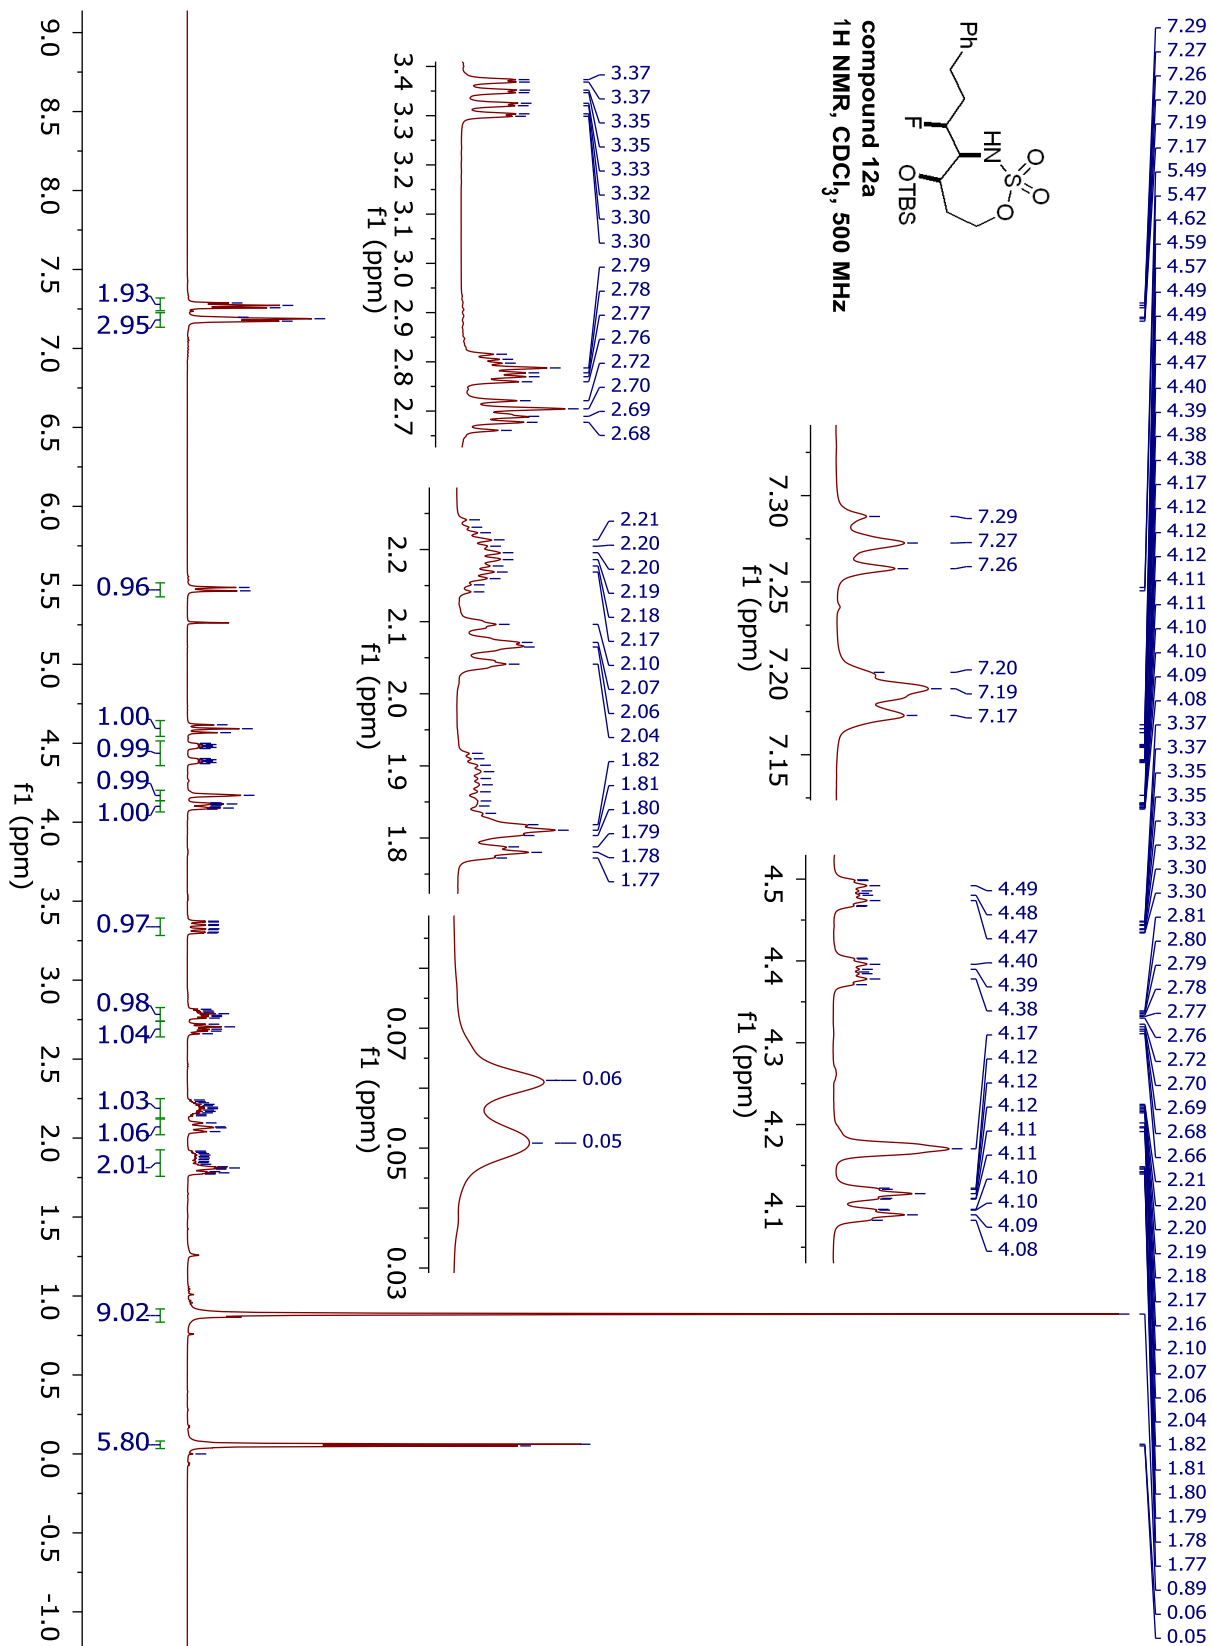



<sup>13</sup>C NMR for compound 12a.

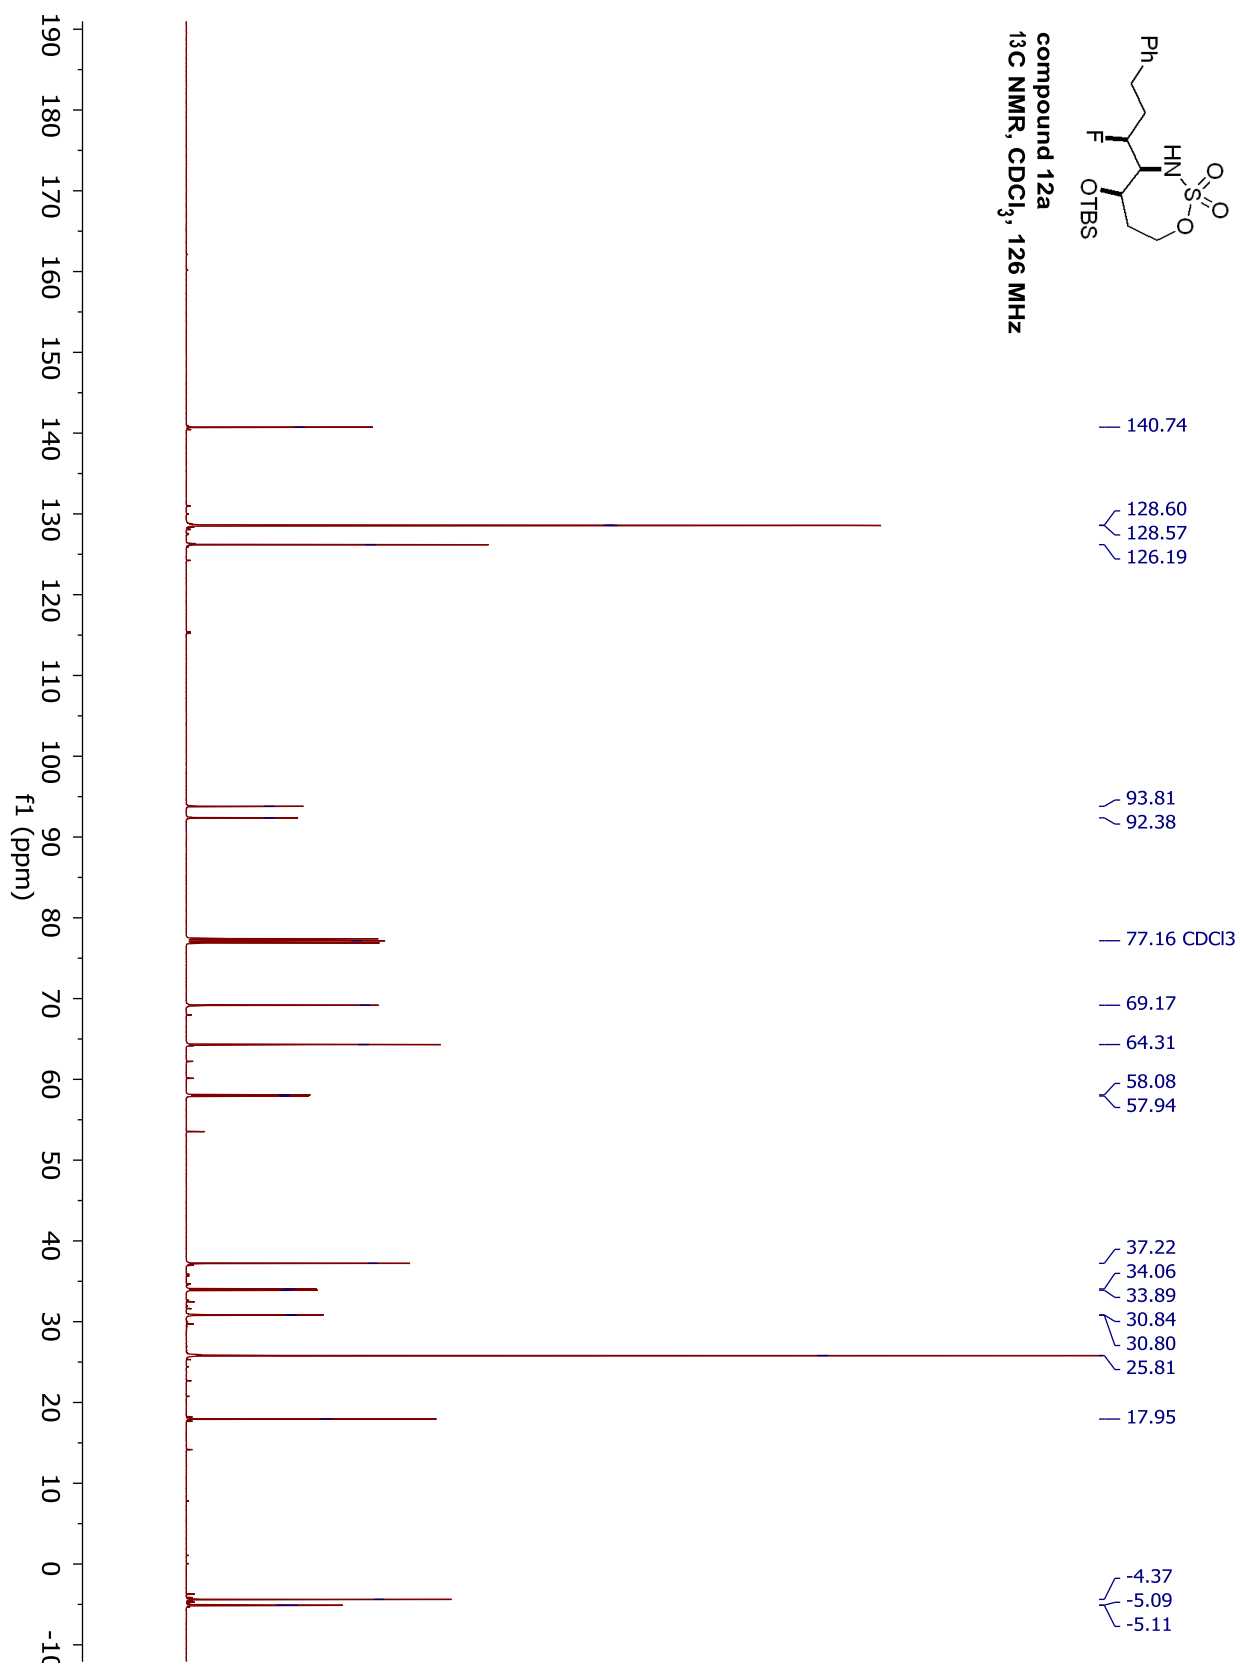

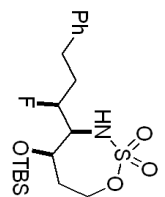

compound 12a  
<sup>19</sup>F NMR, CDCl<sub>3</sub>, 471 MHz

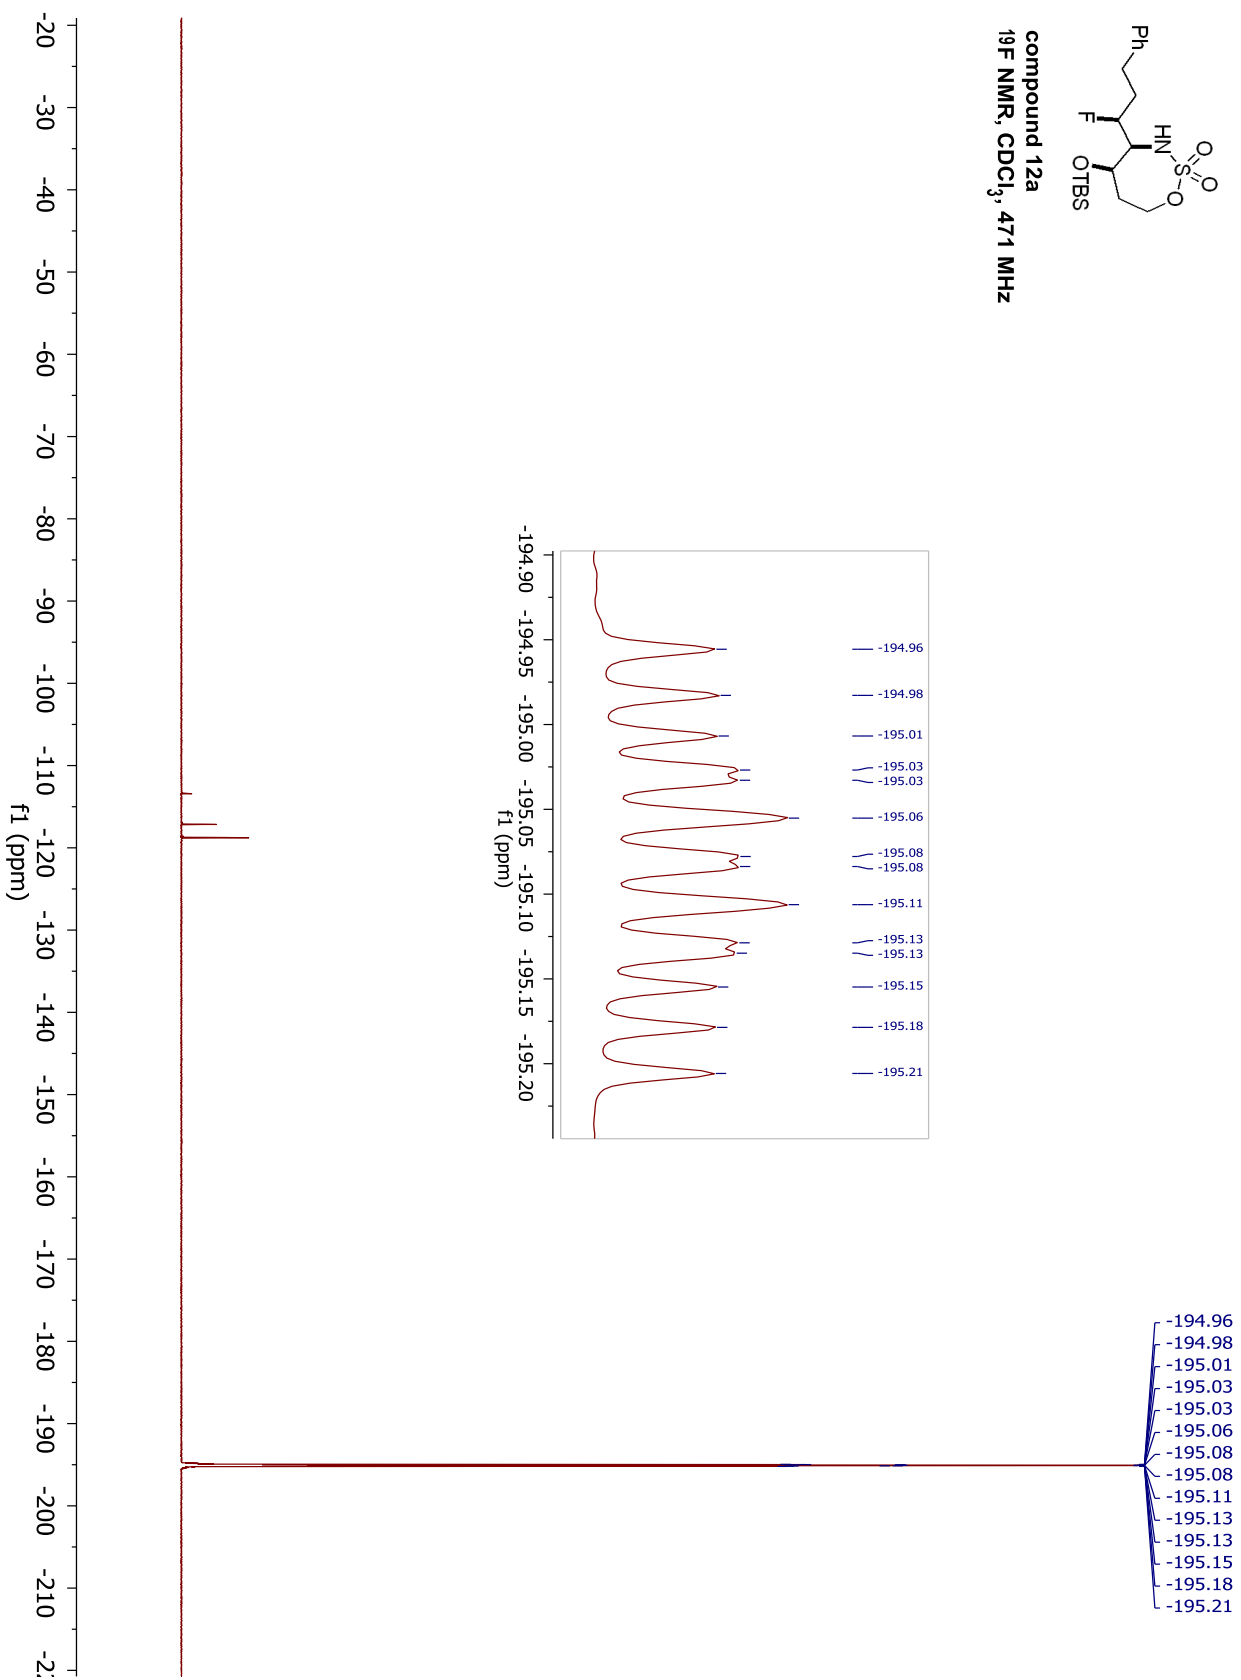

<sup>1</sup>H NMR for compound 13a.

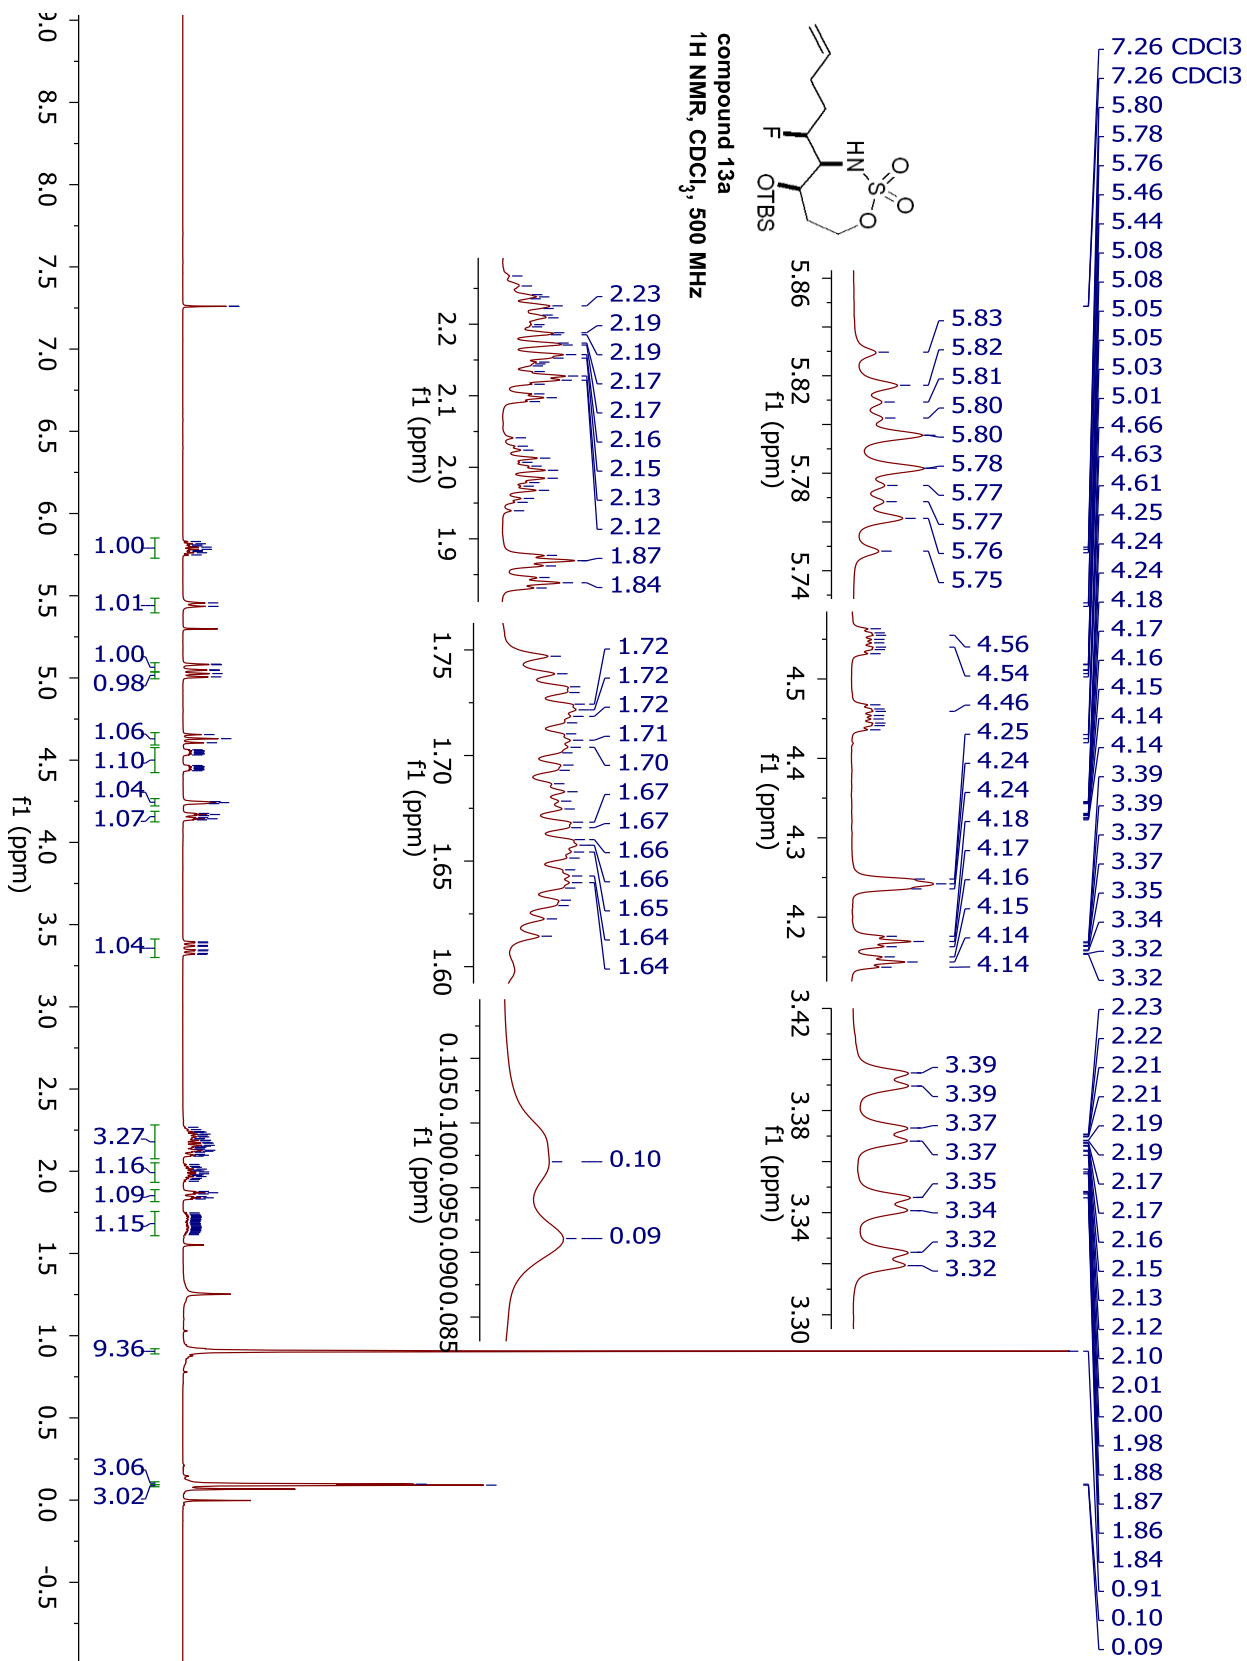

<sup>13</sup>C NMR for compound 13a.

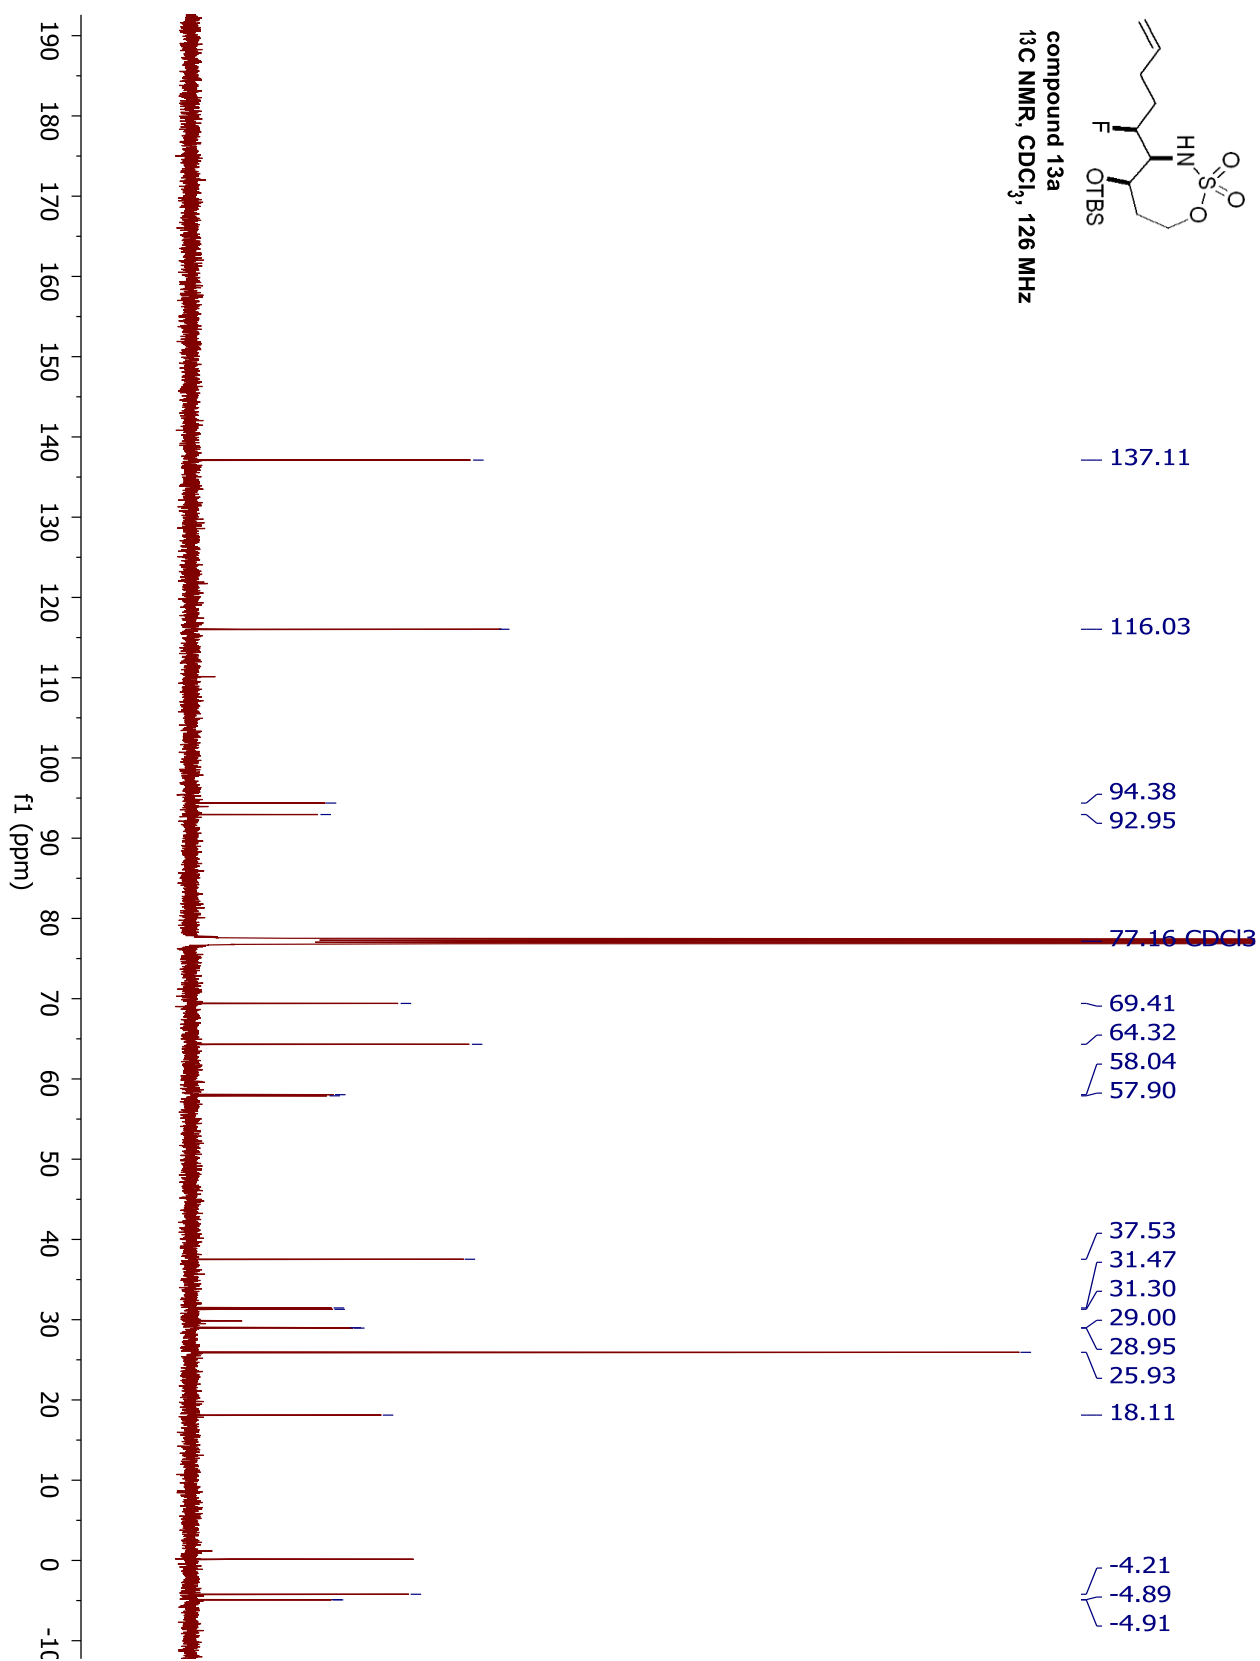

<sup>19</sup>F NMR for compound 13a.

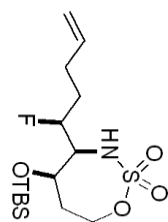

compound 13a  
<sup>19</sup>F NMR, CDCl<sub>3</sub>, 471 MHz

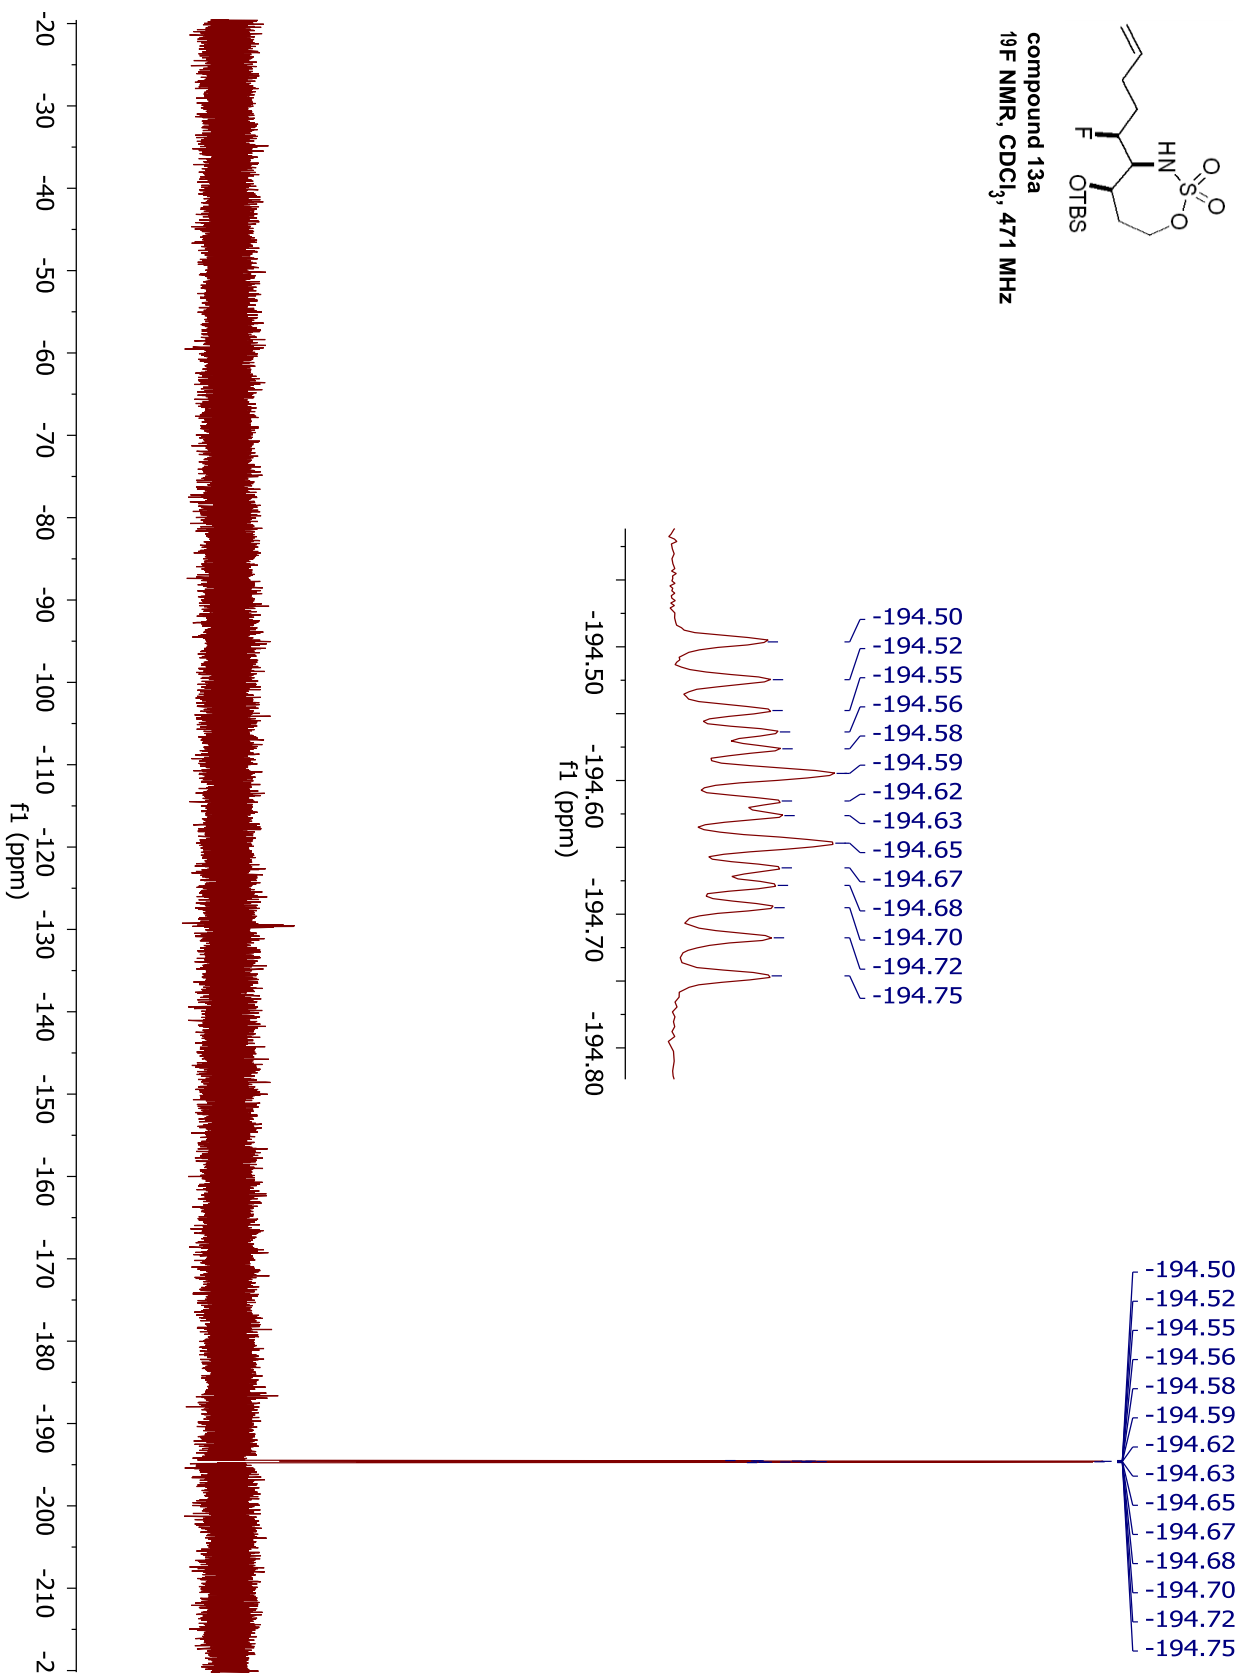

<sup>1</sup>H NMR for compound 14a.

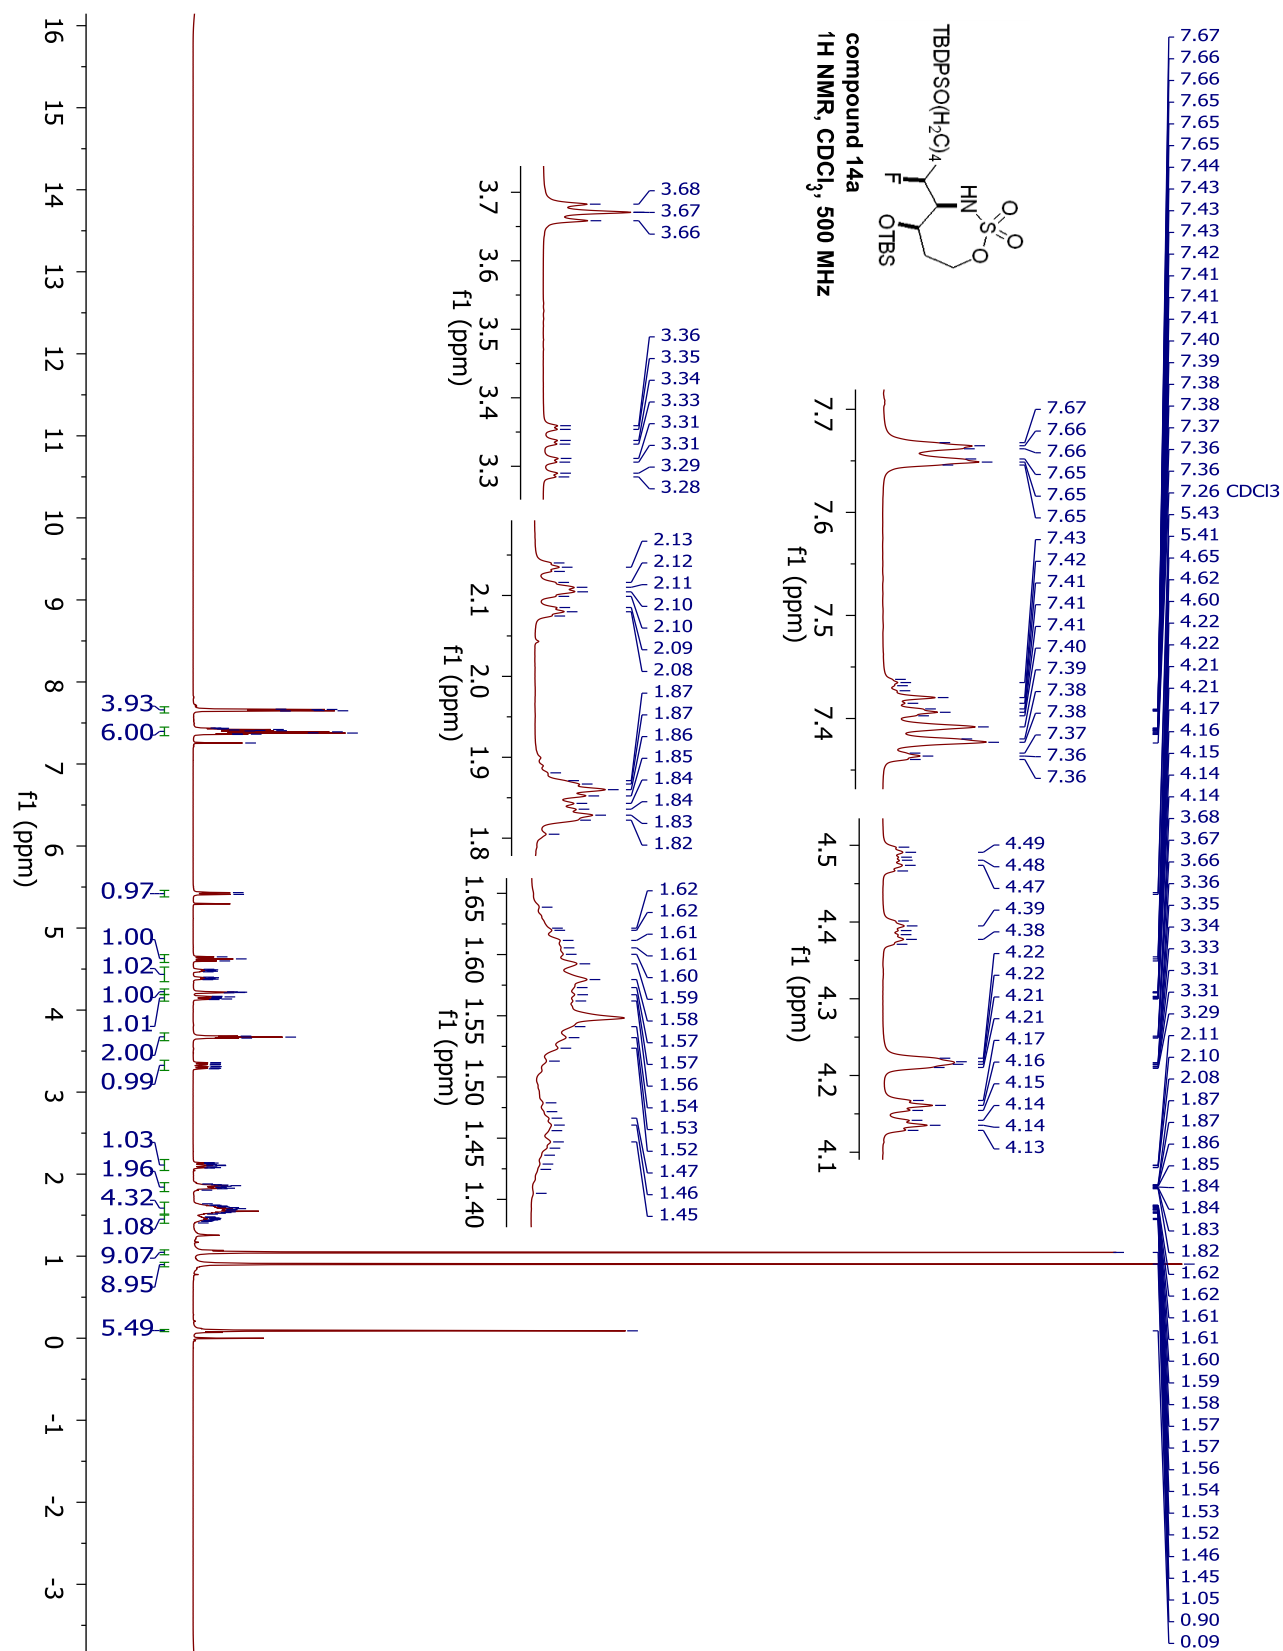

<sup>13</sup>C NMR for compound 14a.

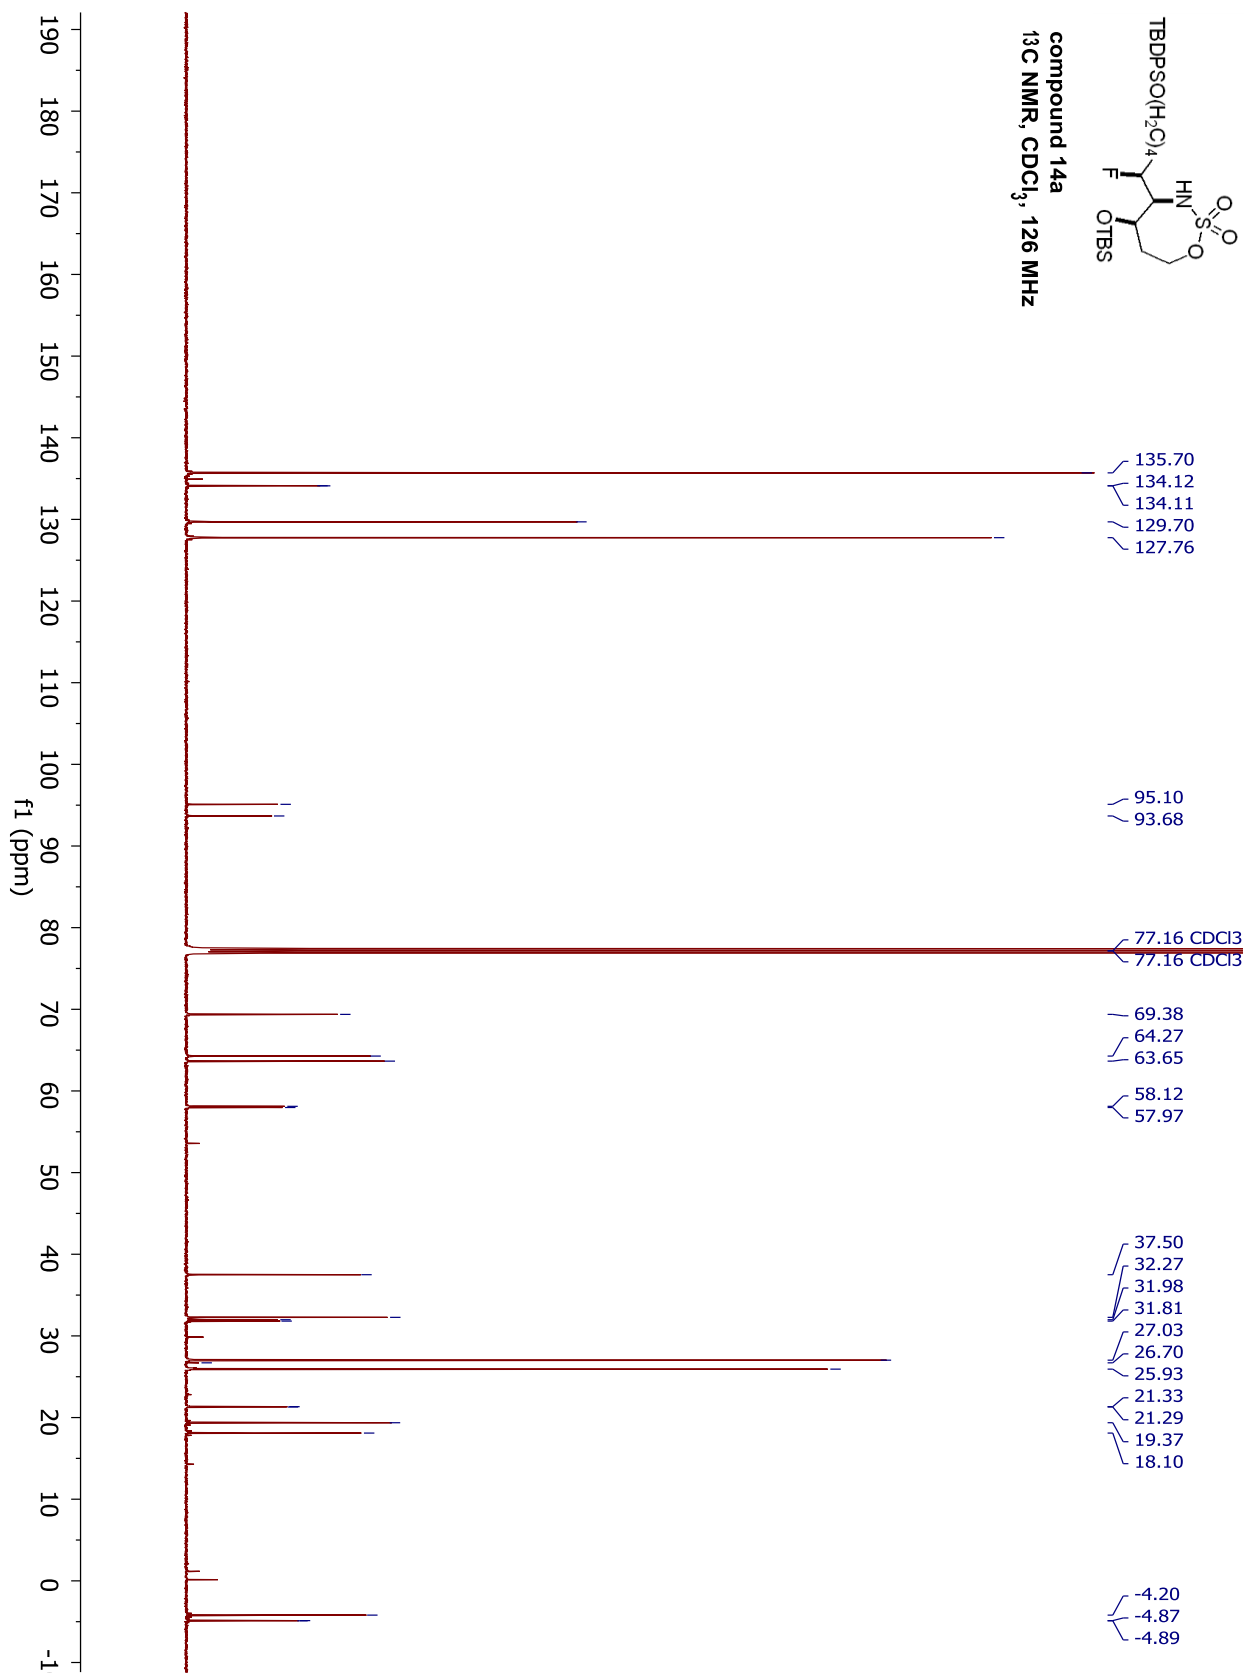

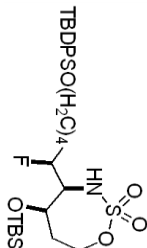

compound 14a  
<sup>19</sup>F NMR, CDCl<sub>3</sub>, 471 MHz

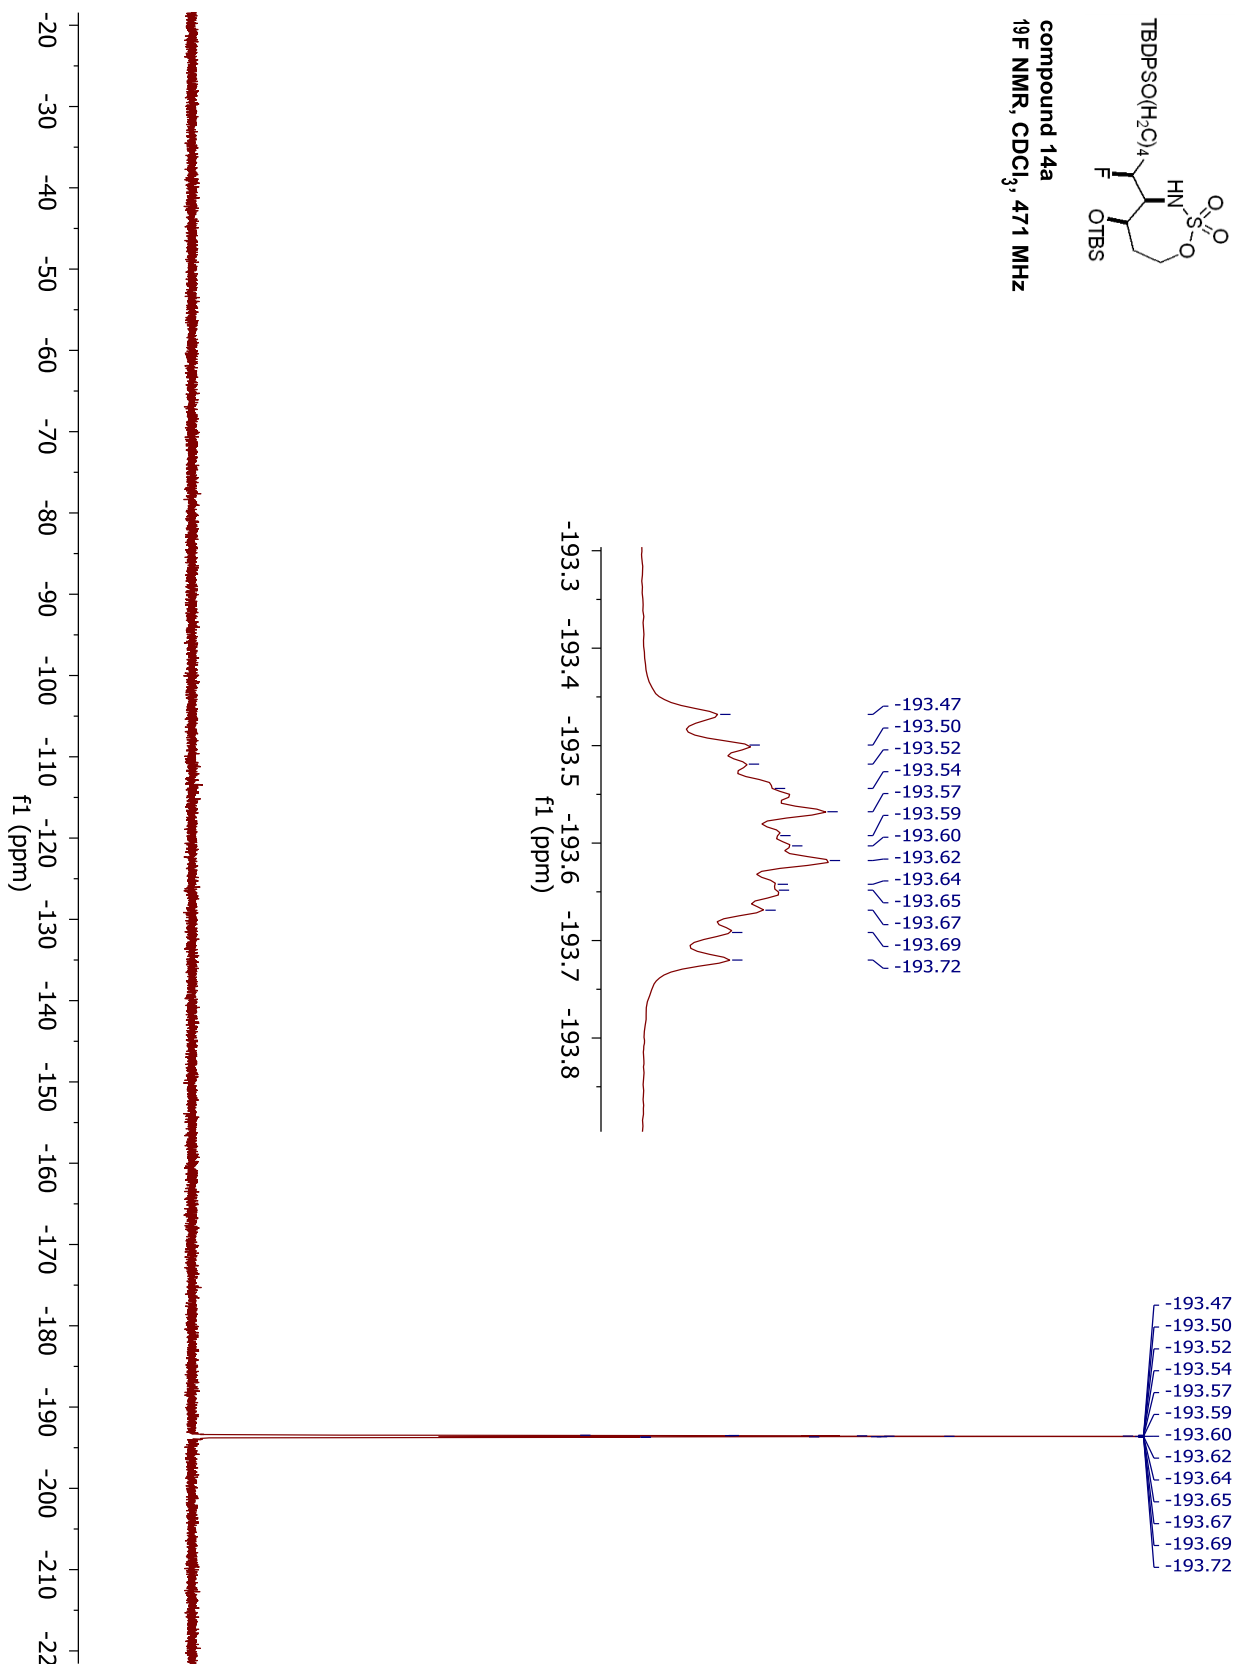



<sup>1</sup>H NMR for compound 15a.

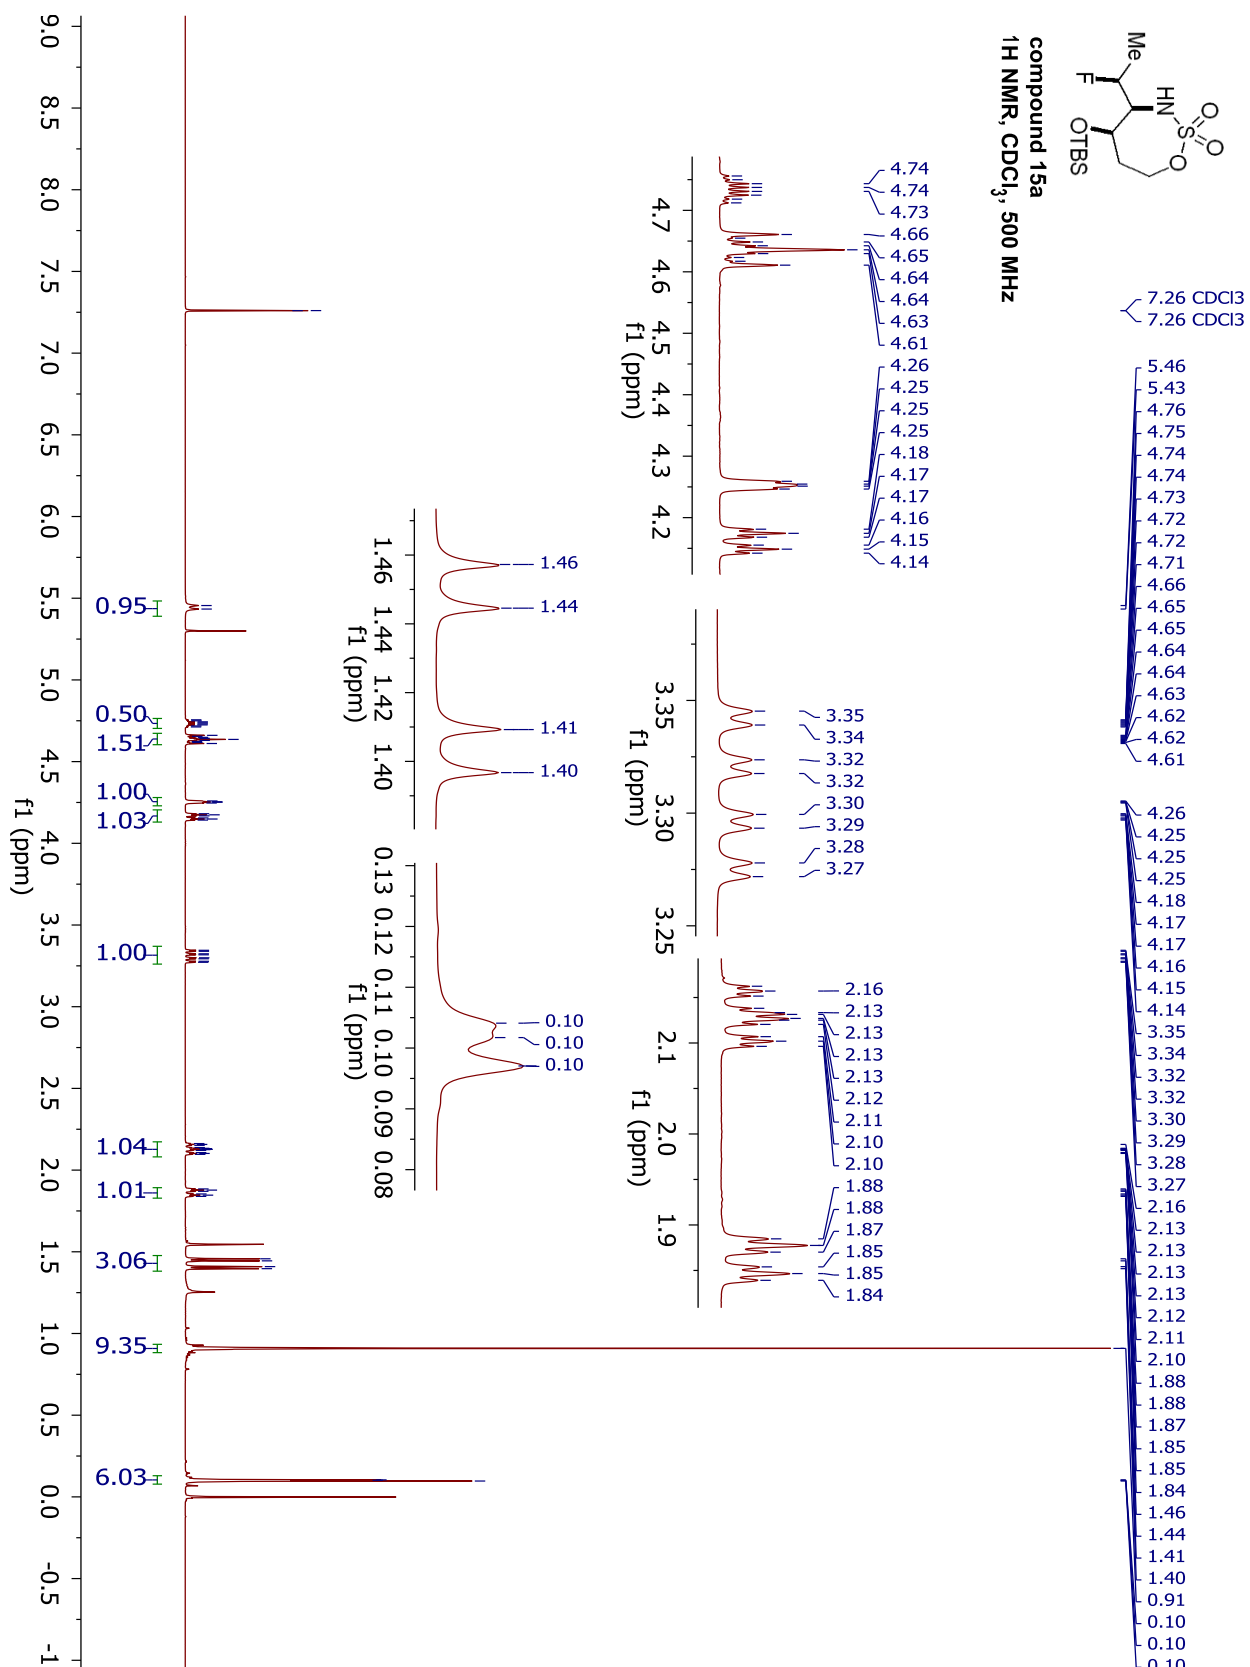

<sup>13</sup>C NMR for compound 15a.

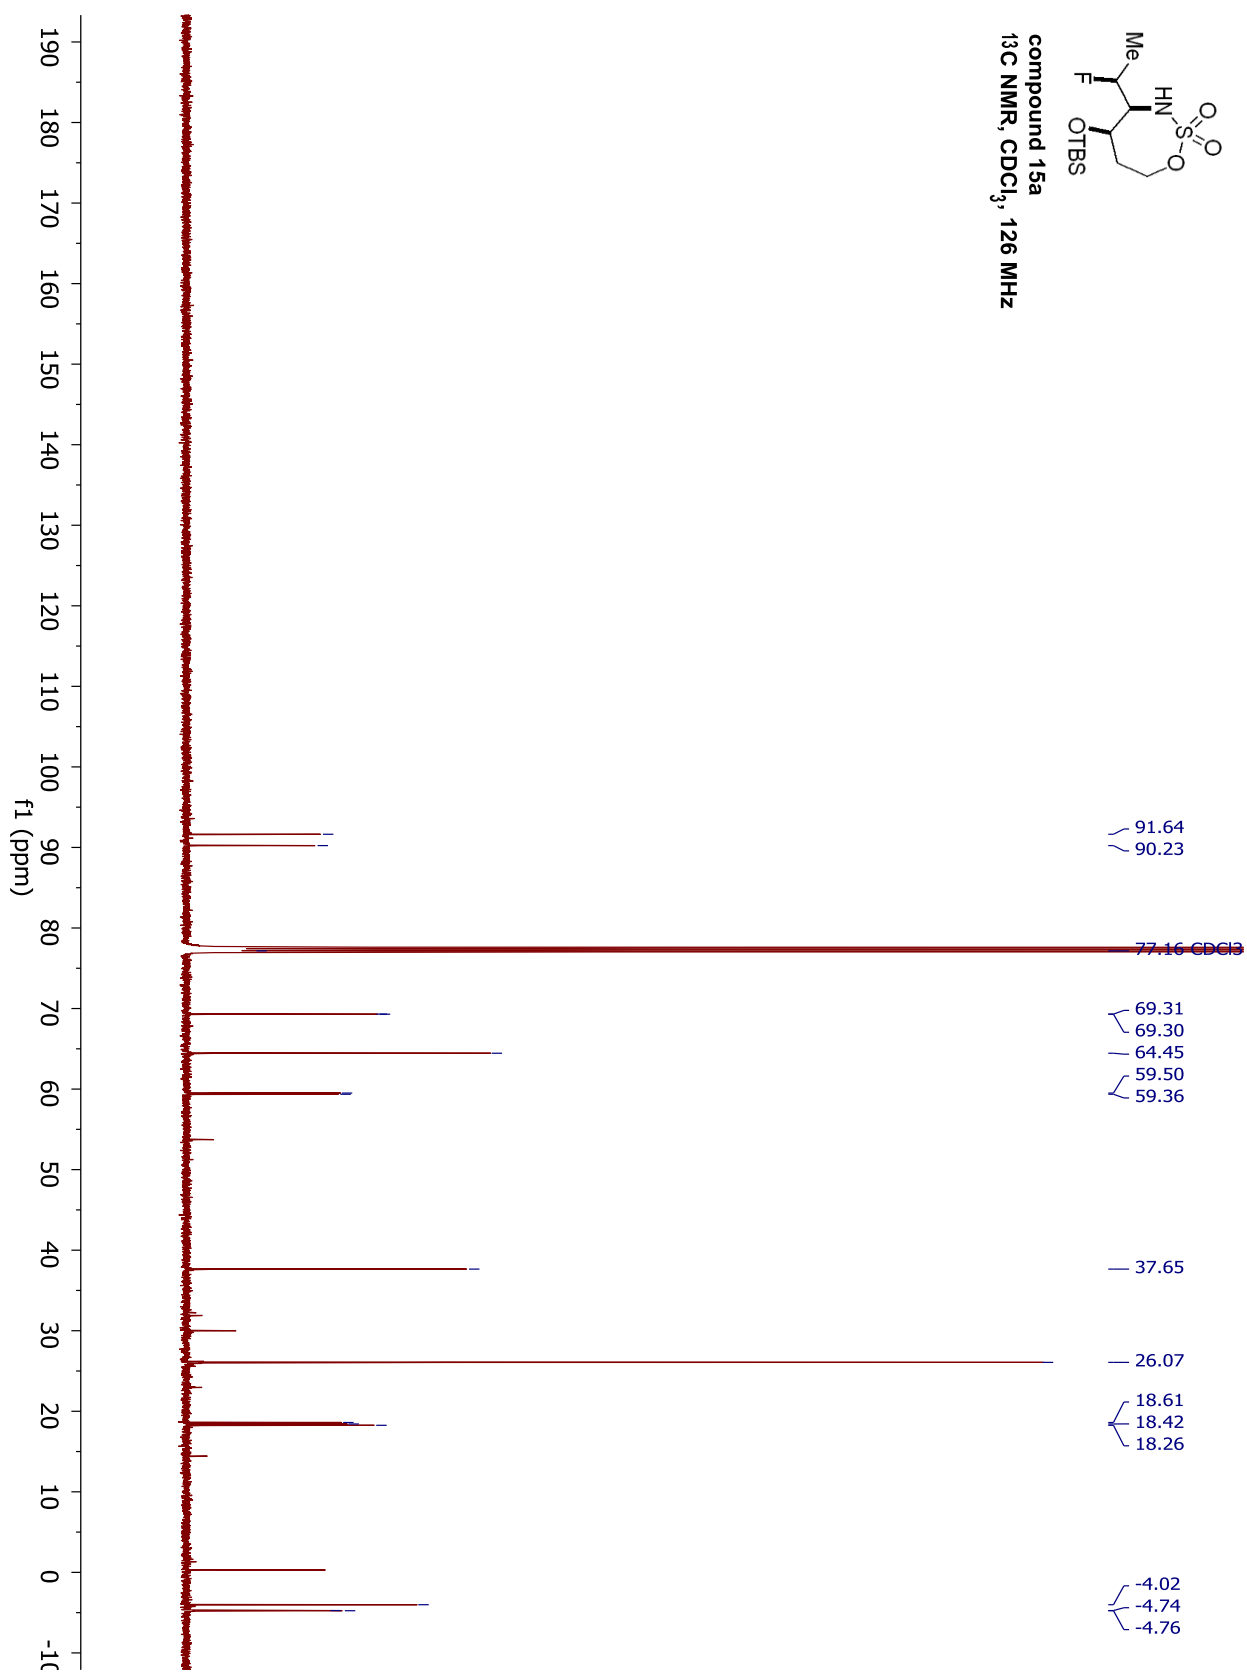

**<sup>19</sup>F NMR for compound 15a.**

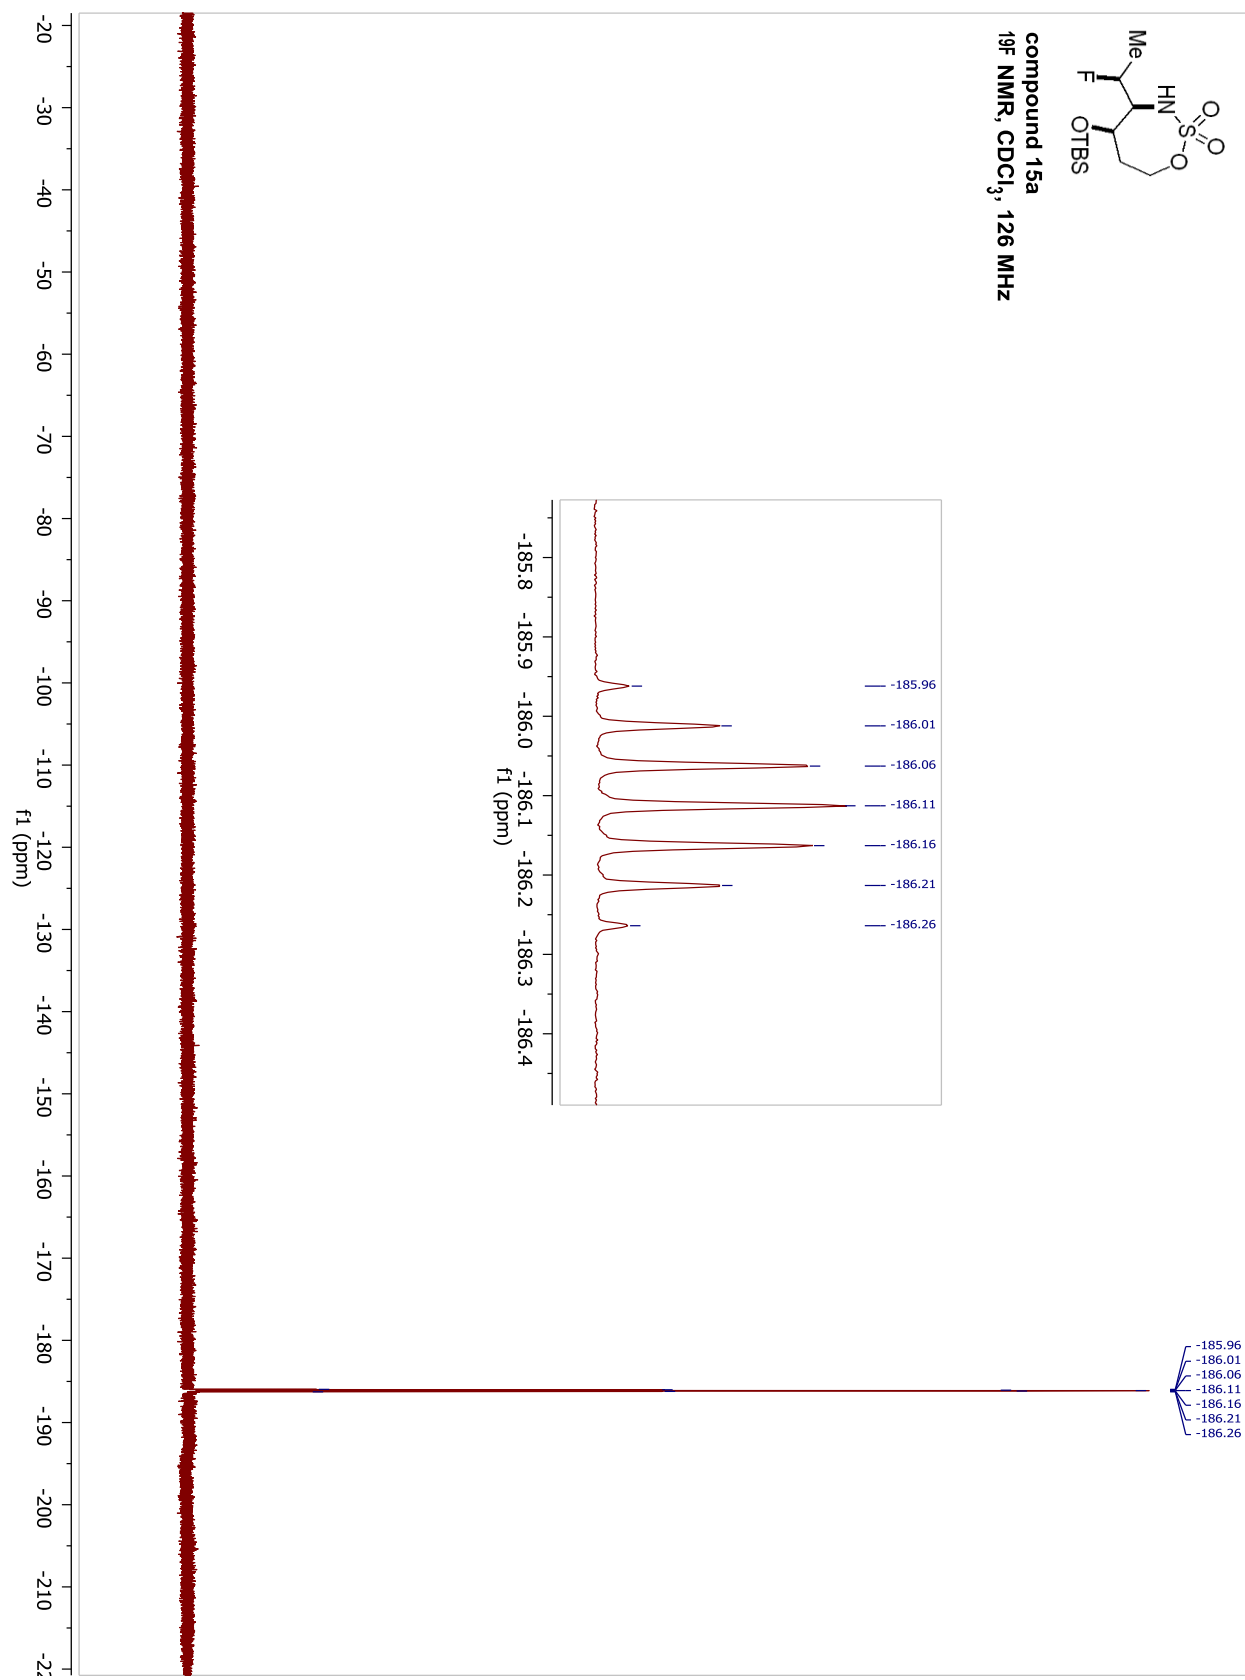

# <sup>1</sup>H NMR for compound 16a.

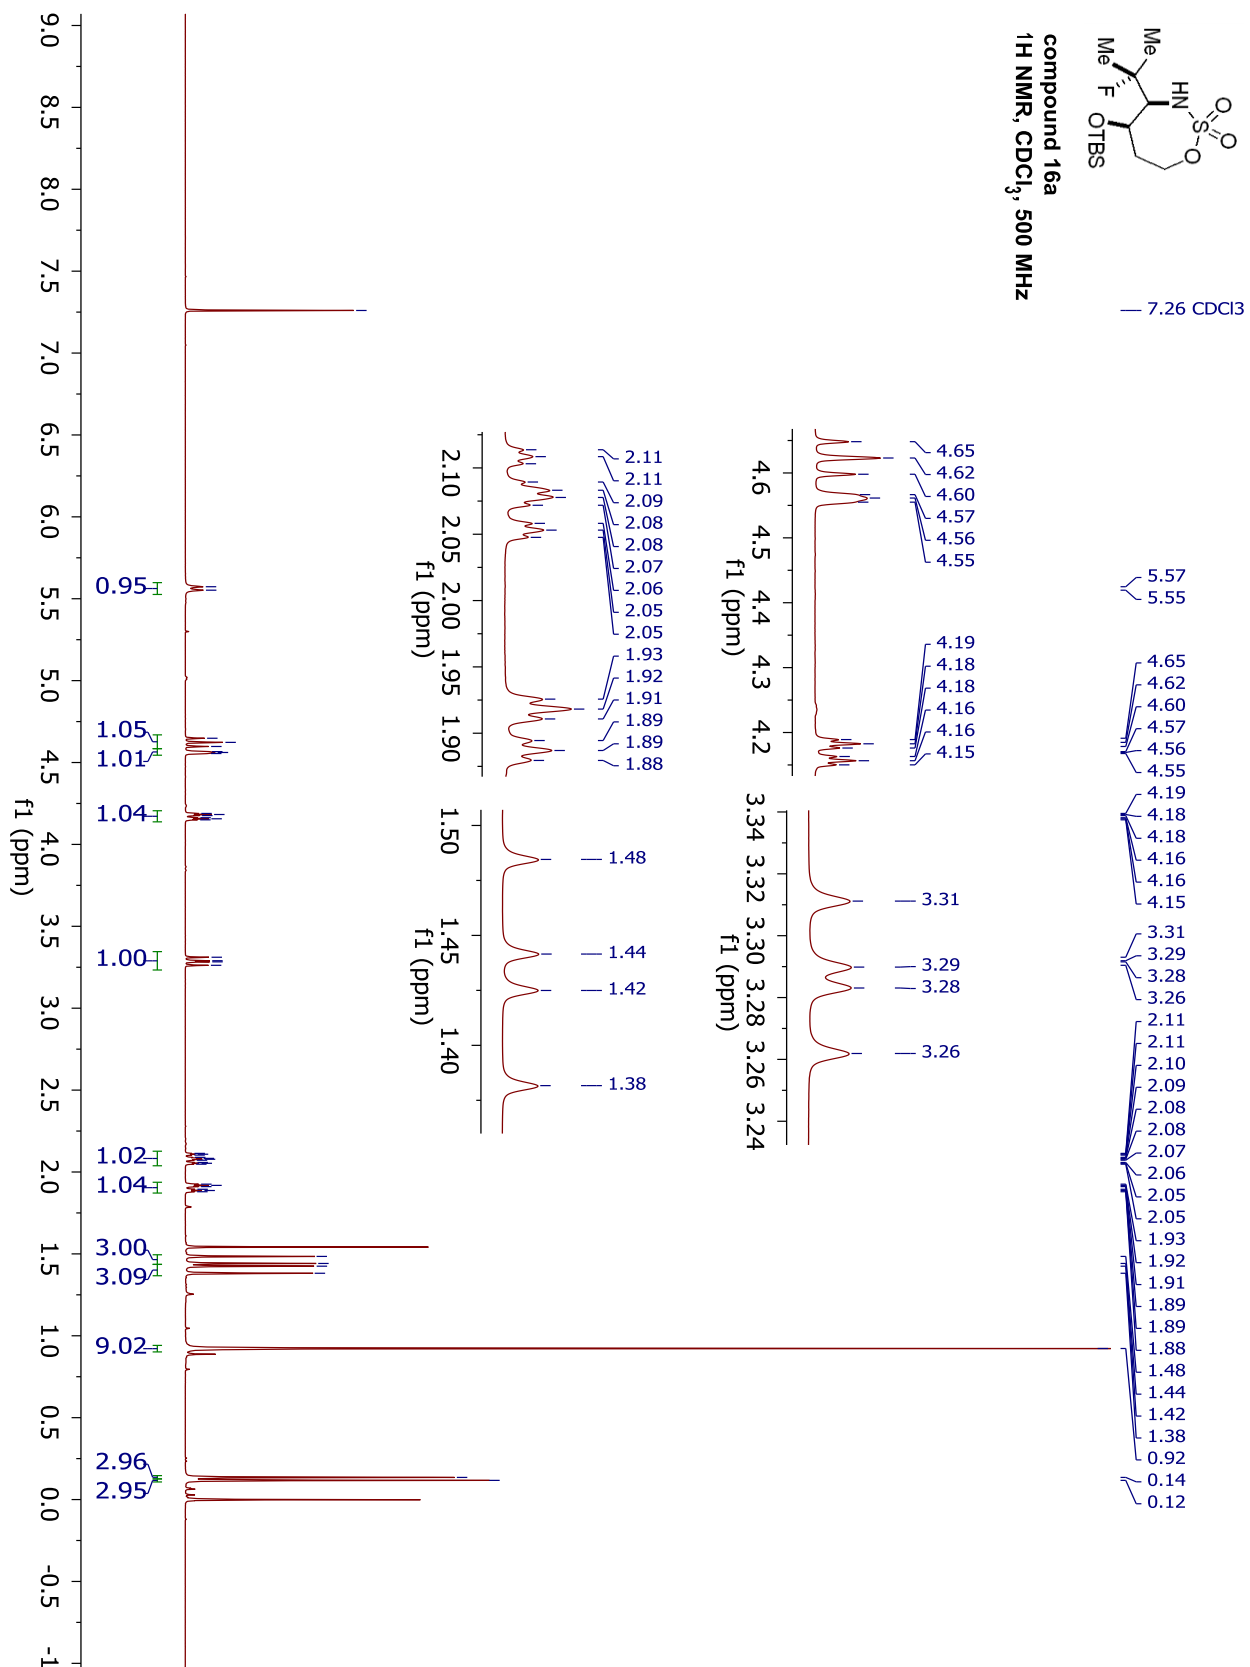

<sup>13</sup>C NMR for compound 16a.

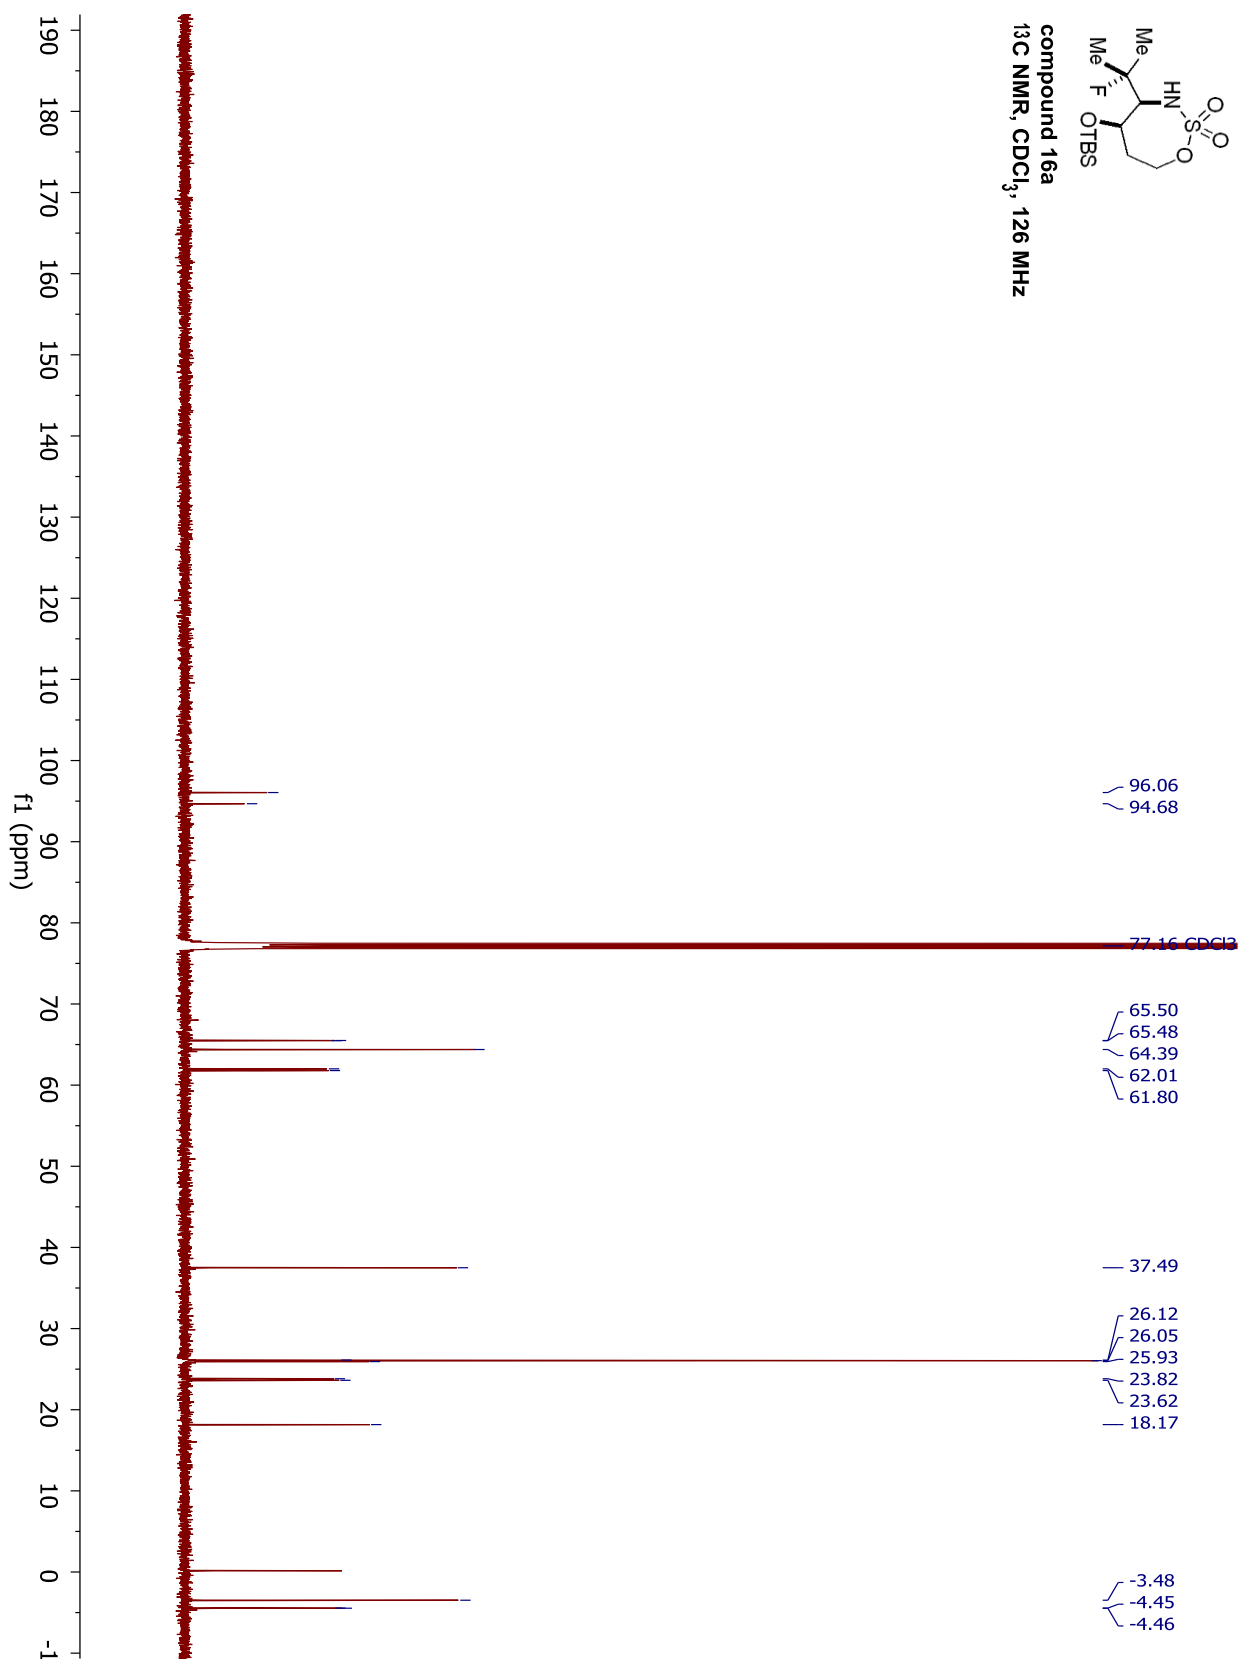

**$^{19}\text{F}$  NMR for compound 16a.**

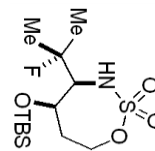

compound 16a  
 $^{19}\text{F}$  NMR,  $\text{CDCl}_3$ , 471 MHz

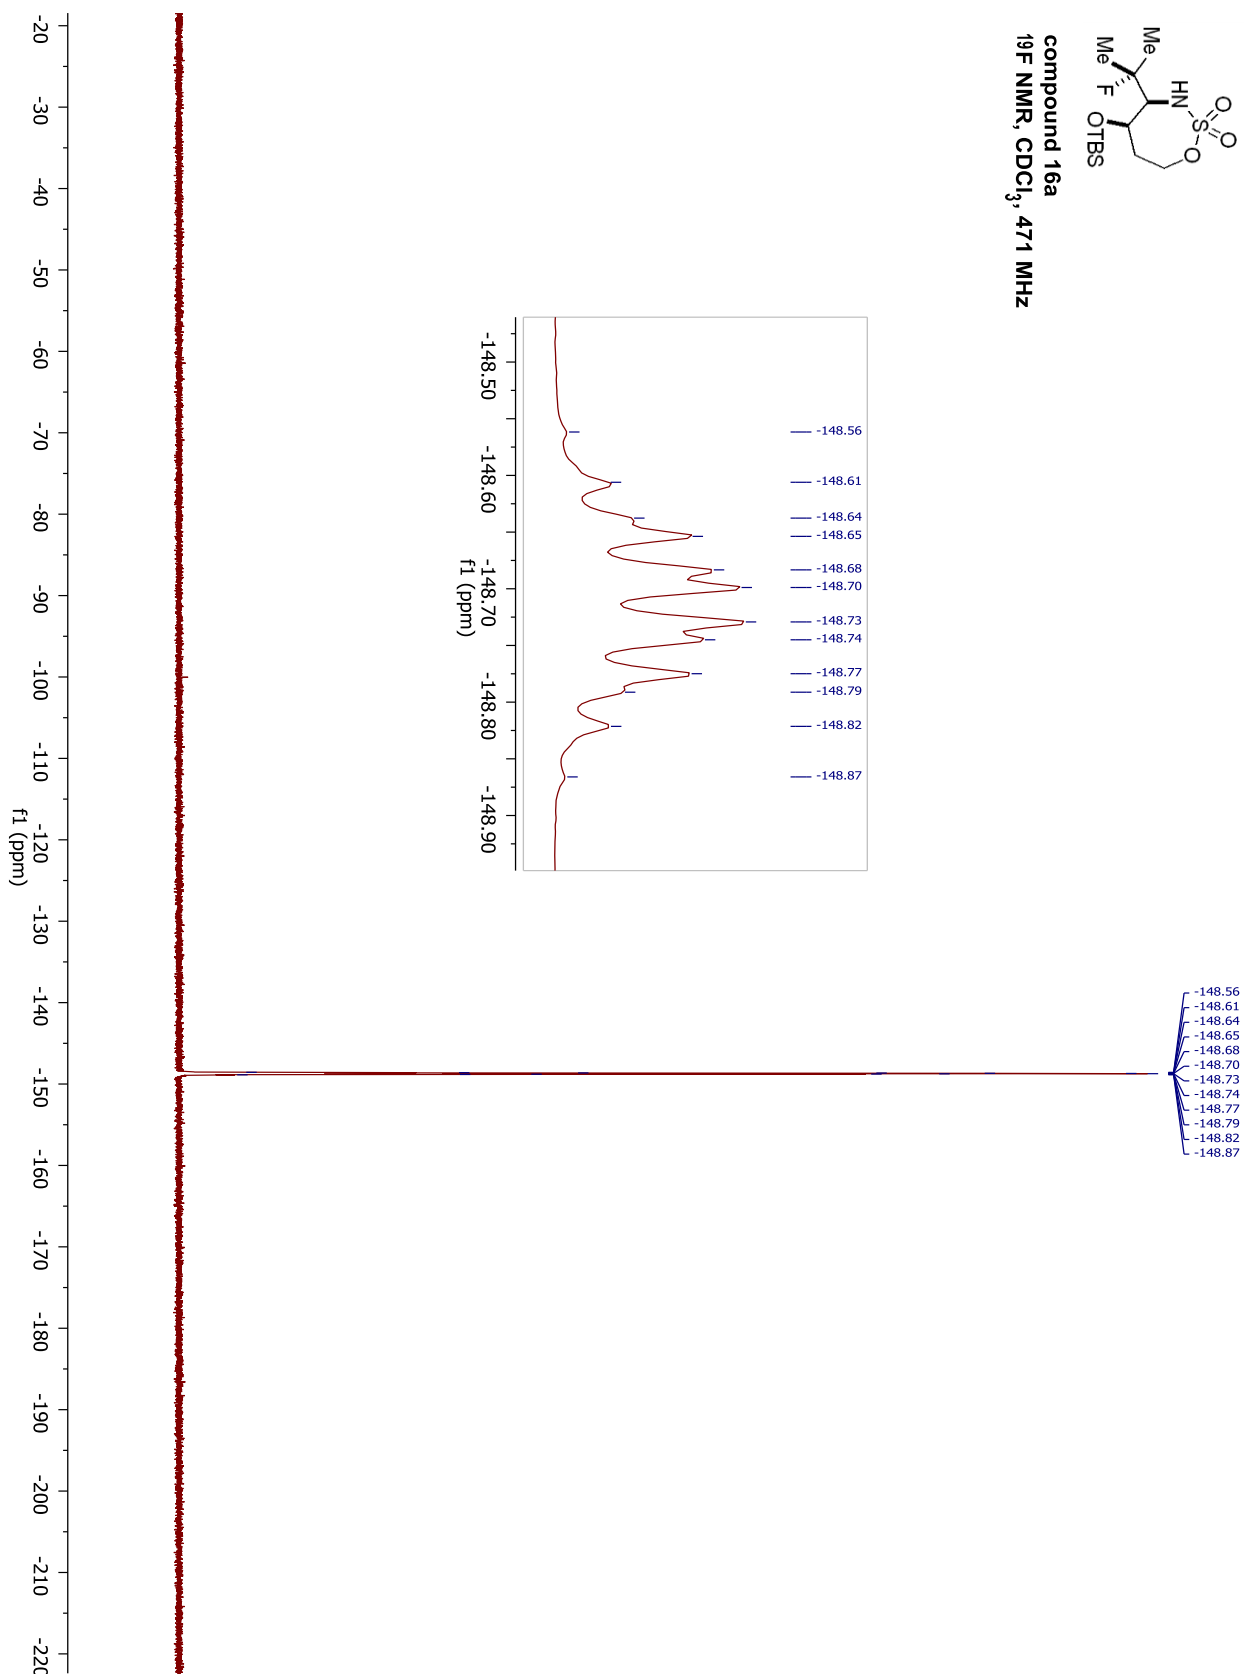

<sup>1</sup>H NMR for compound 16b.

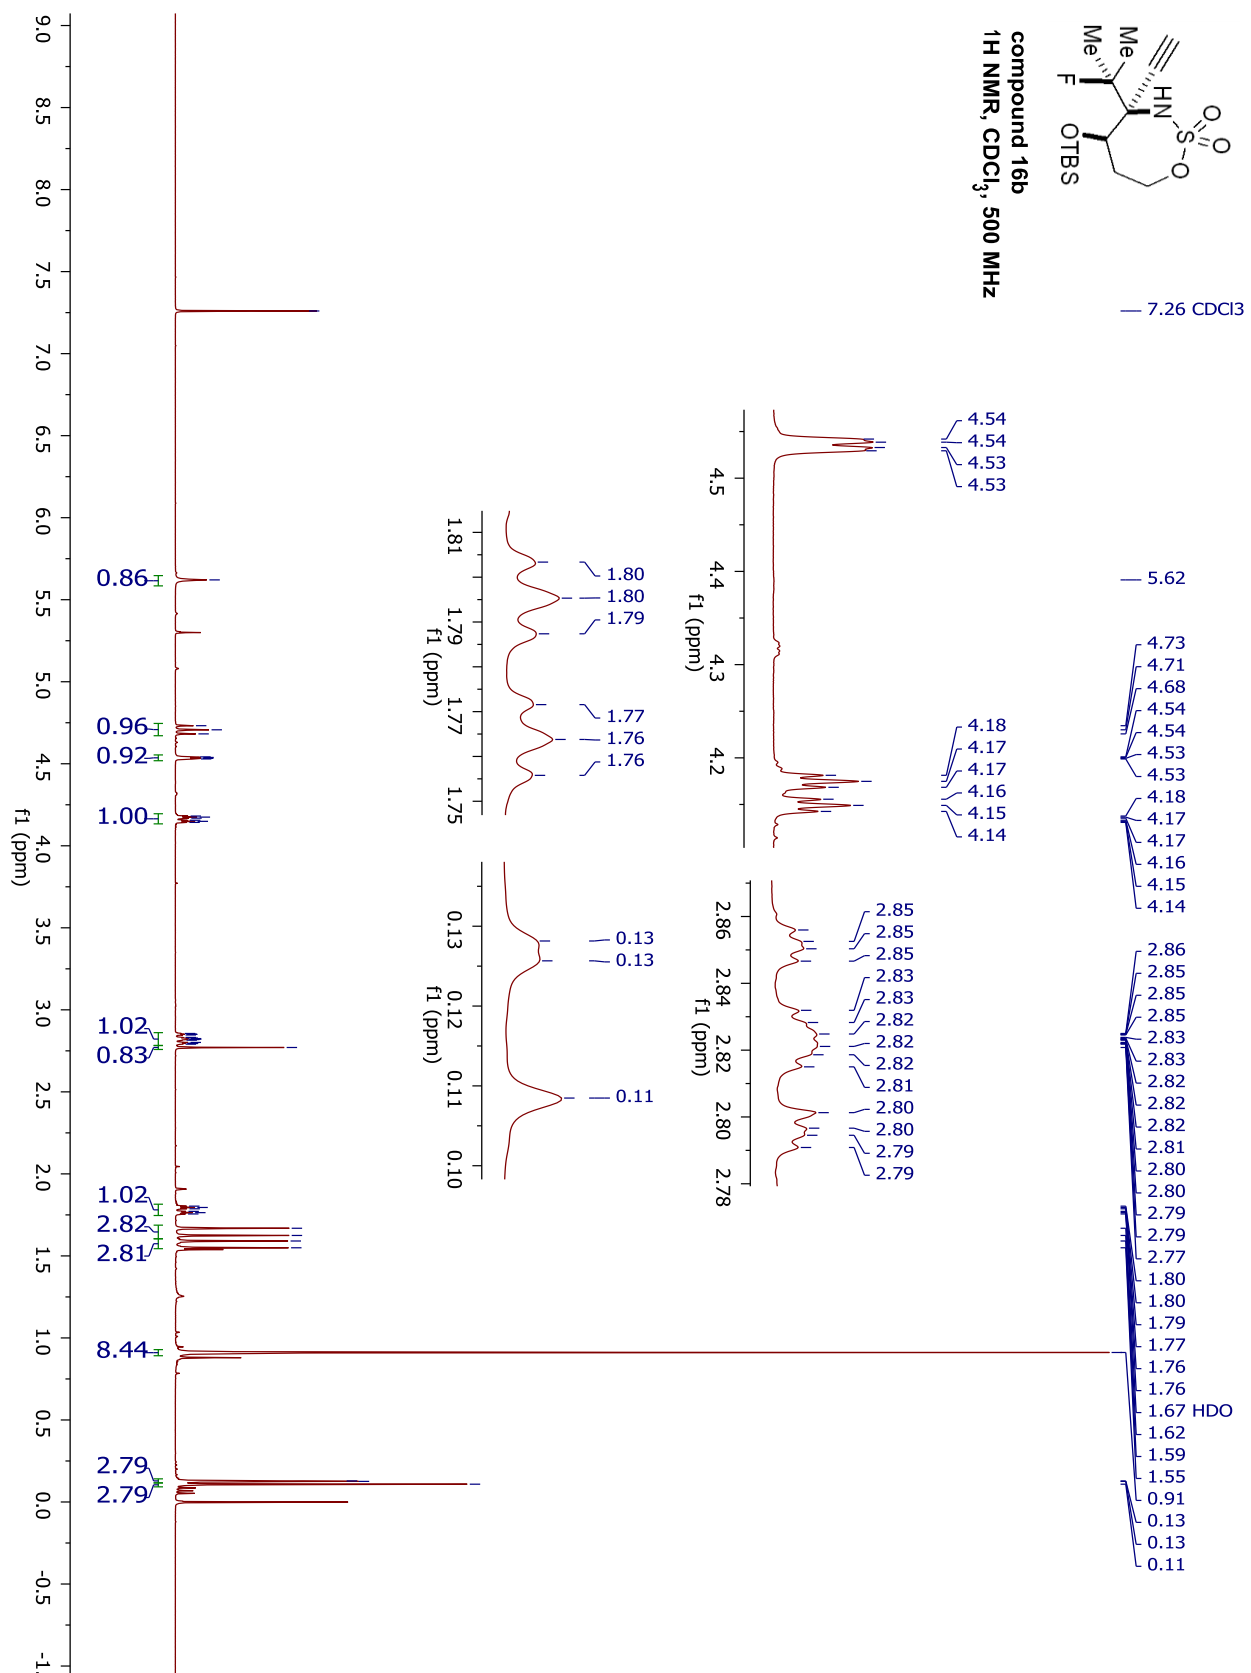

<sup>13</sup>C NMR for compound 16b.

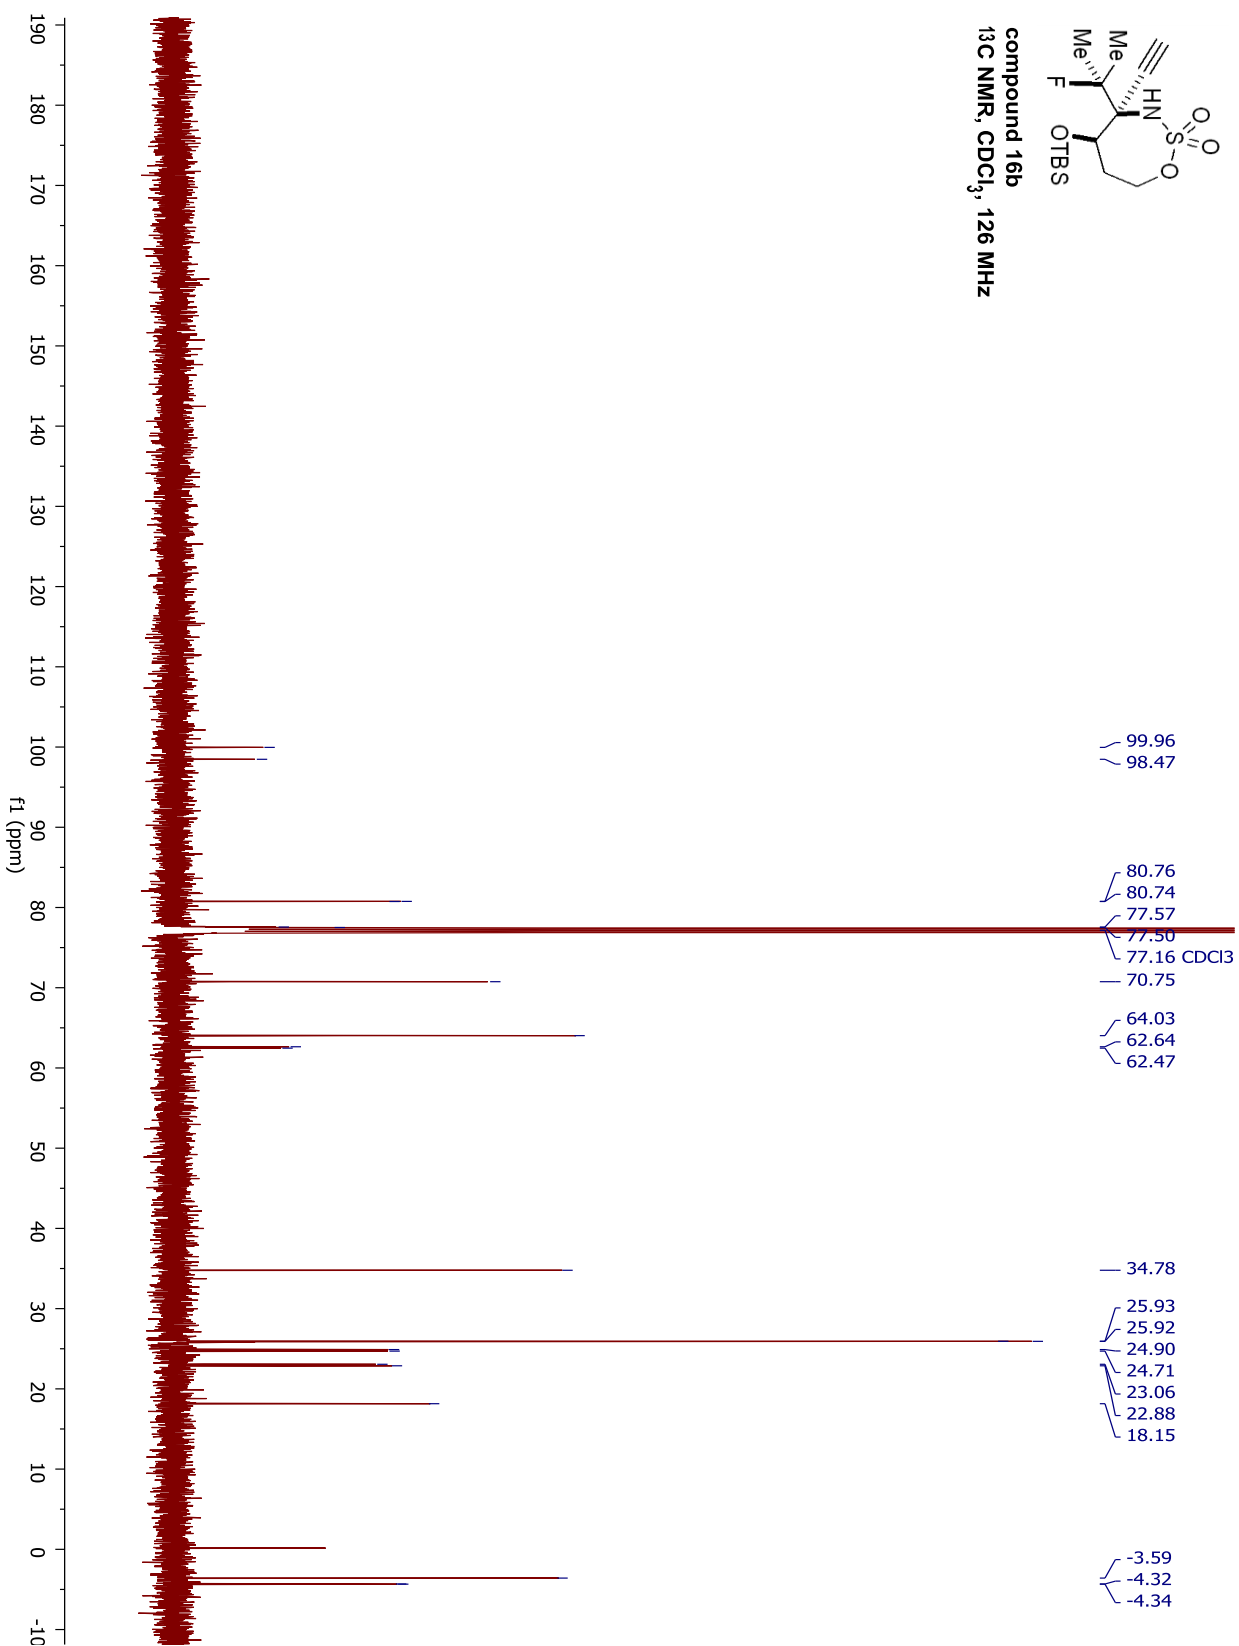



**<sup>19</sup>F NMR for compound 16b.**

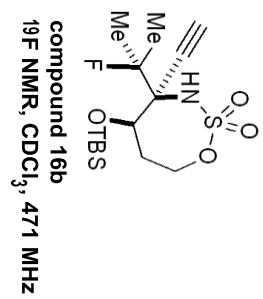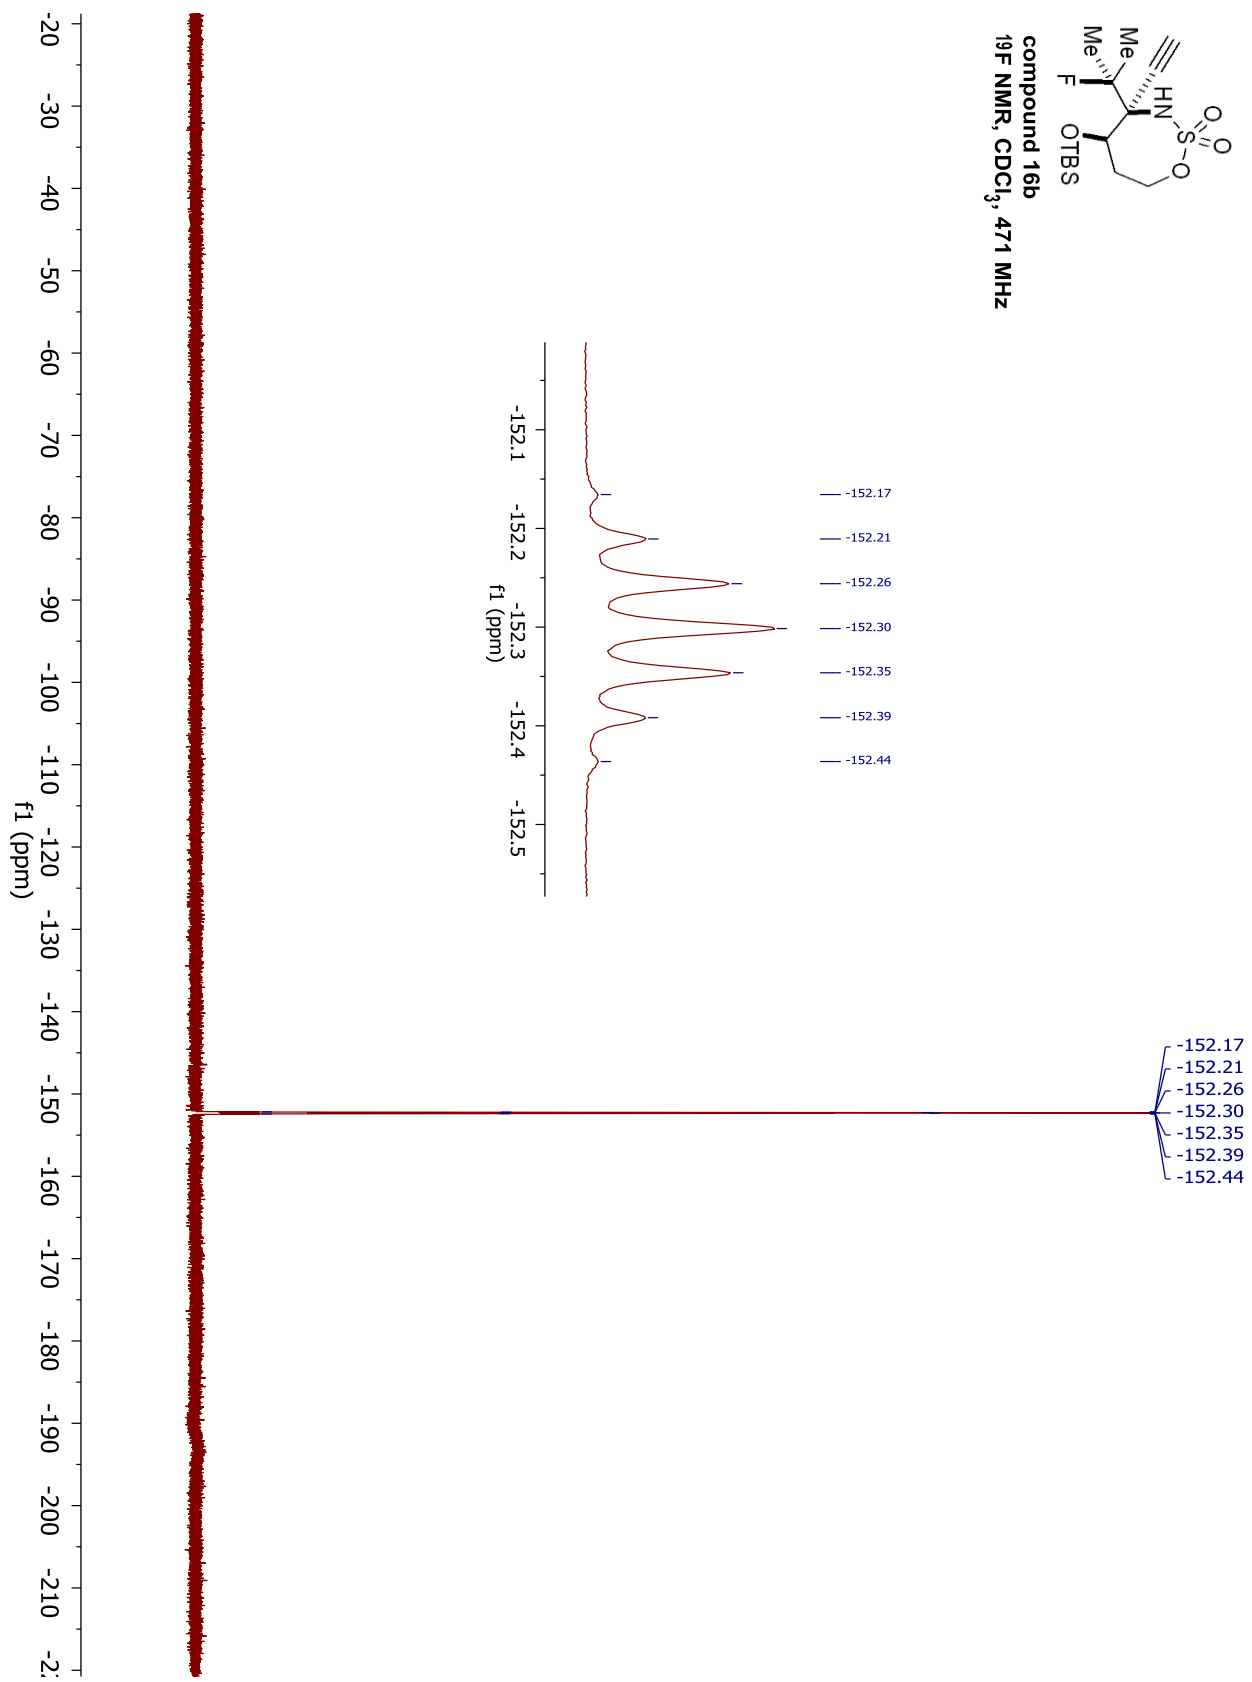

<sup>1</sup>H NMR for compound 16c.

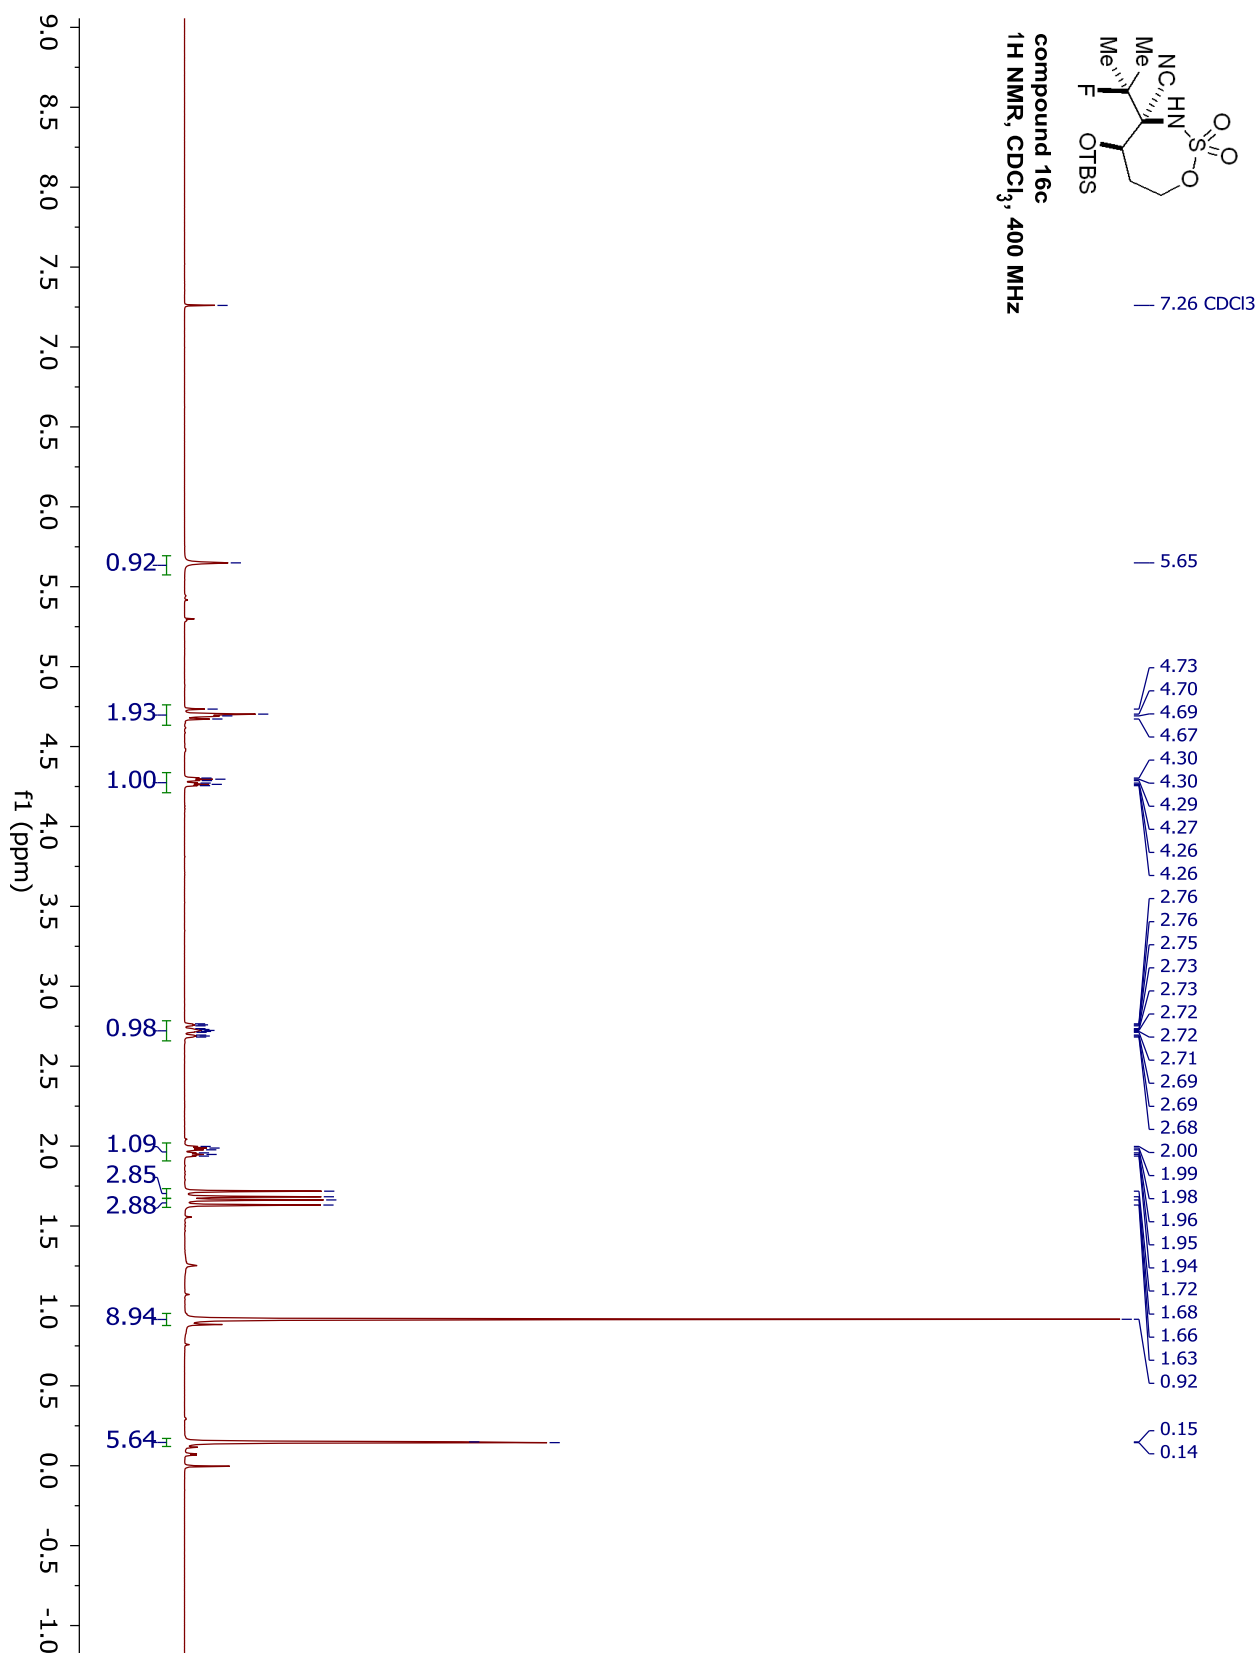

<sup>13</sup>C NMR for compound 16c.

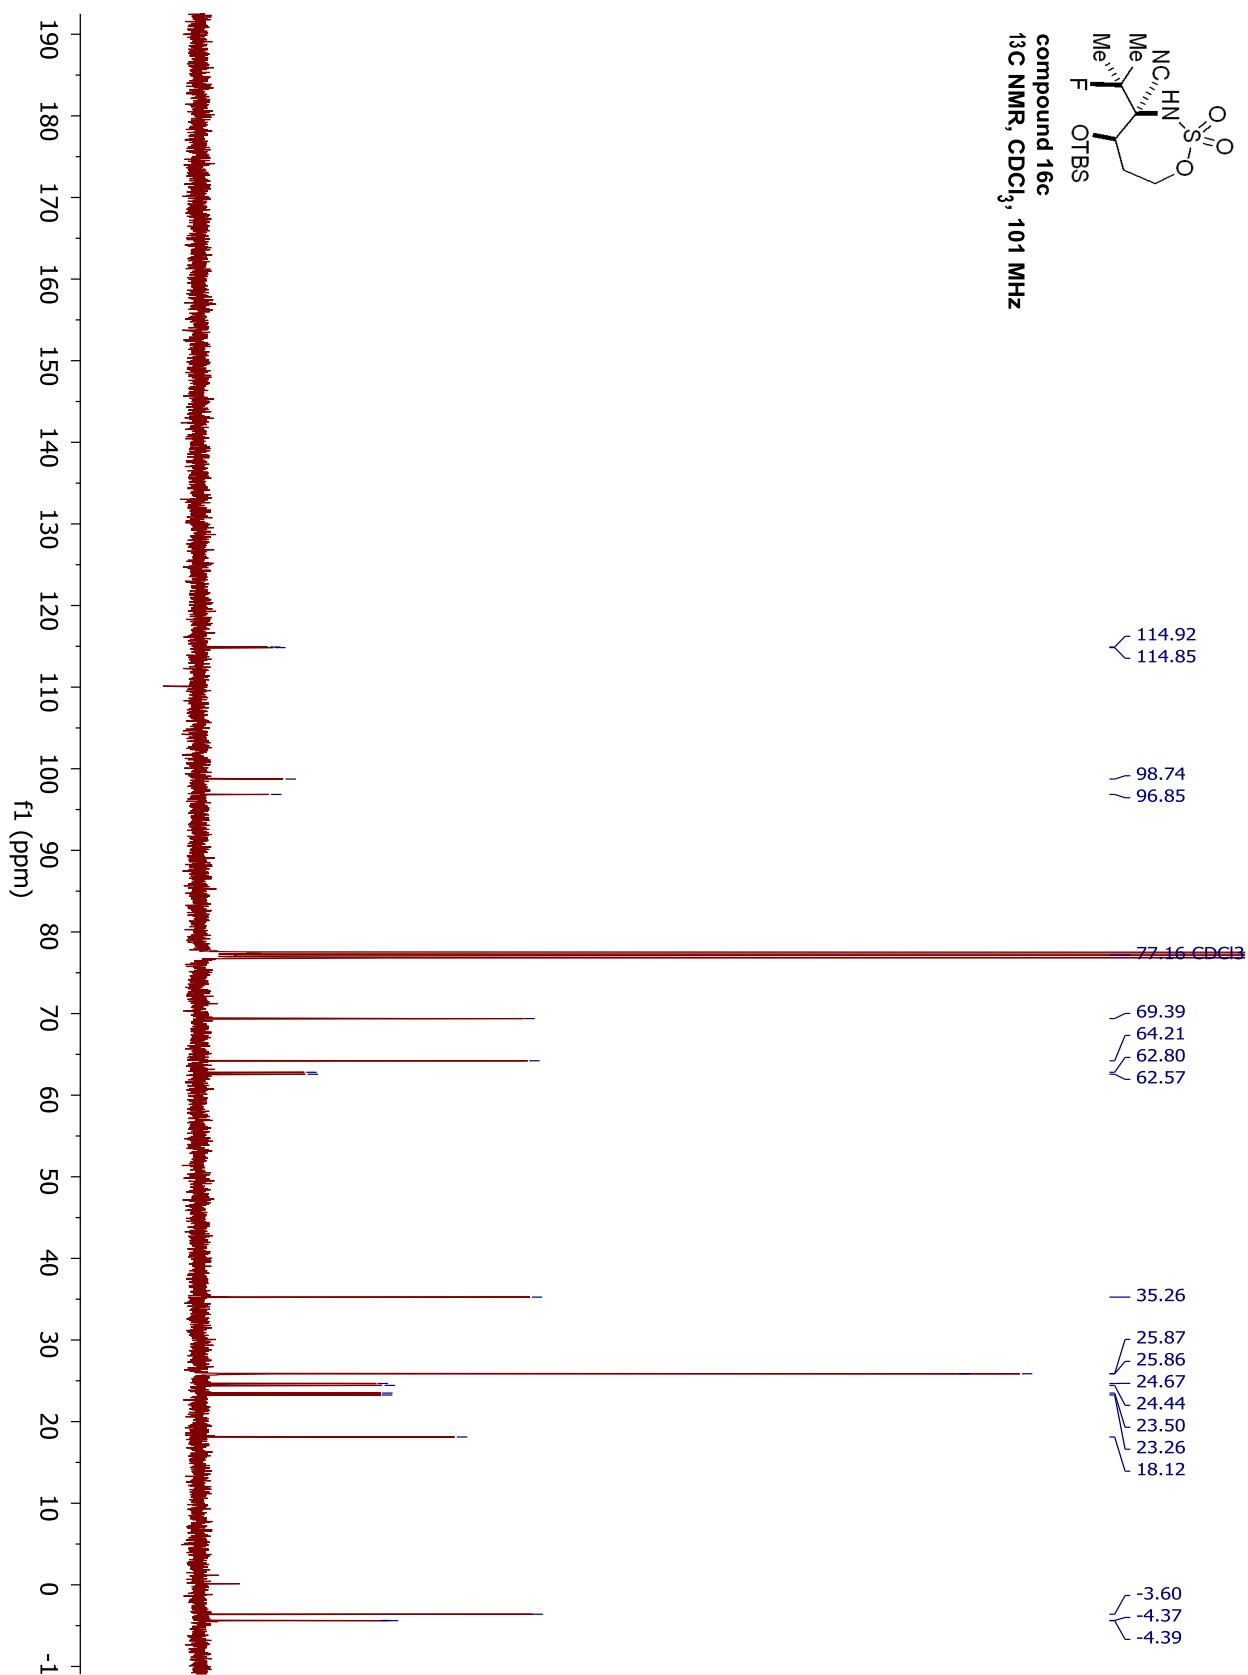

**<sup>19</sup>F NMR for compound 16c.**

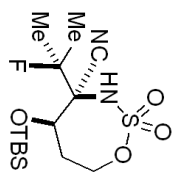

**compound 16c**  
**<sup>19</sup>F NMR, CDCl<sub>3</sub>, 376 MHz**

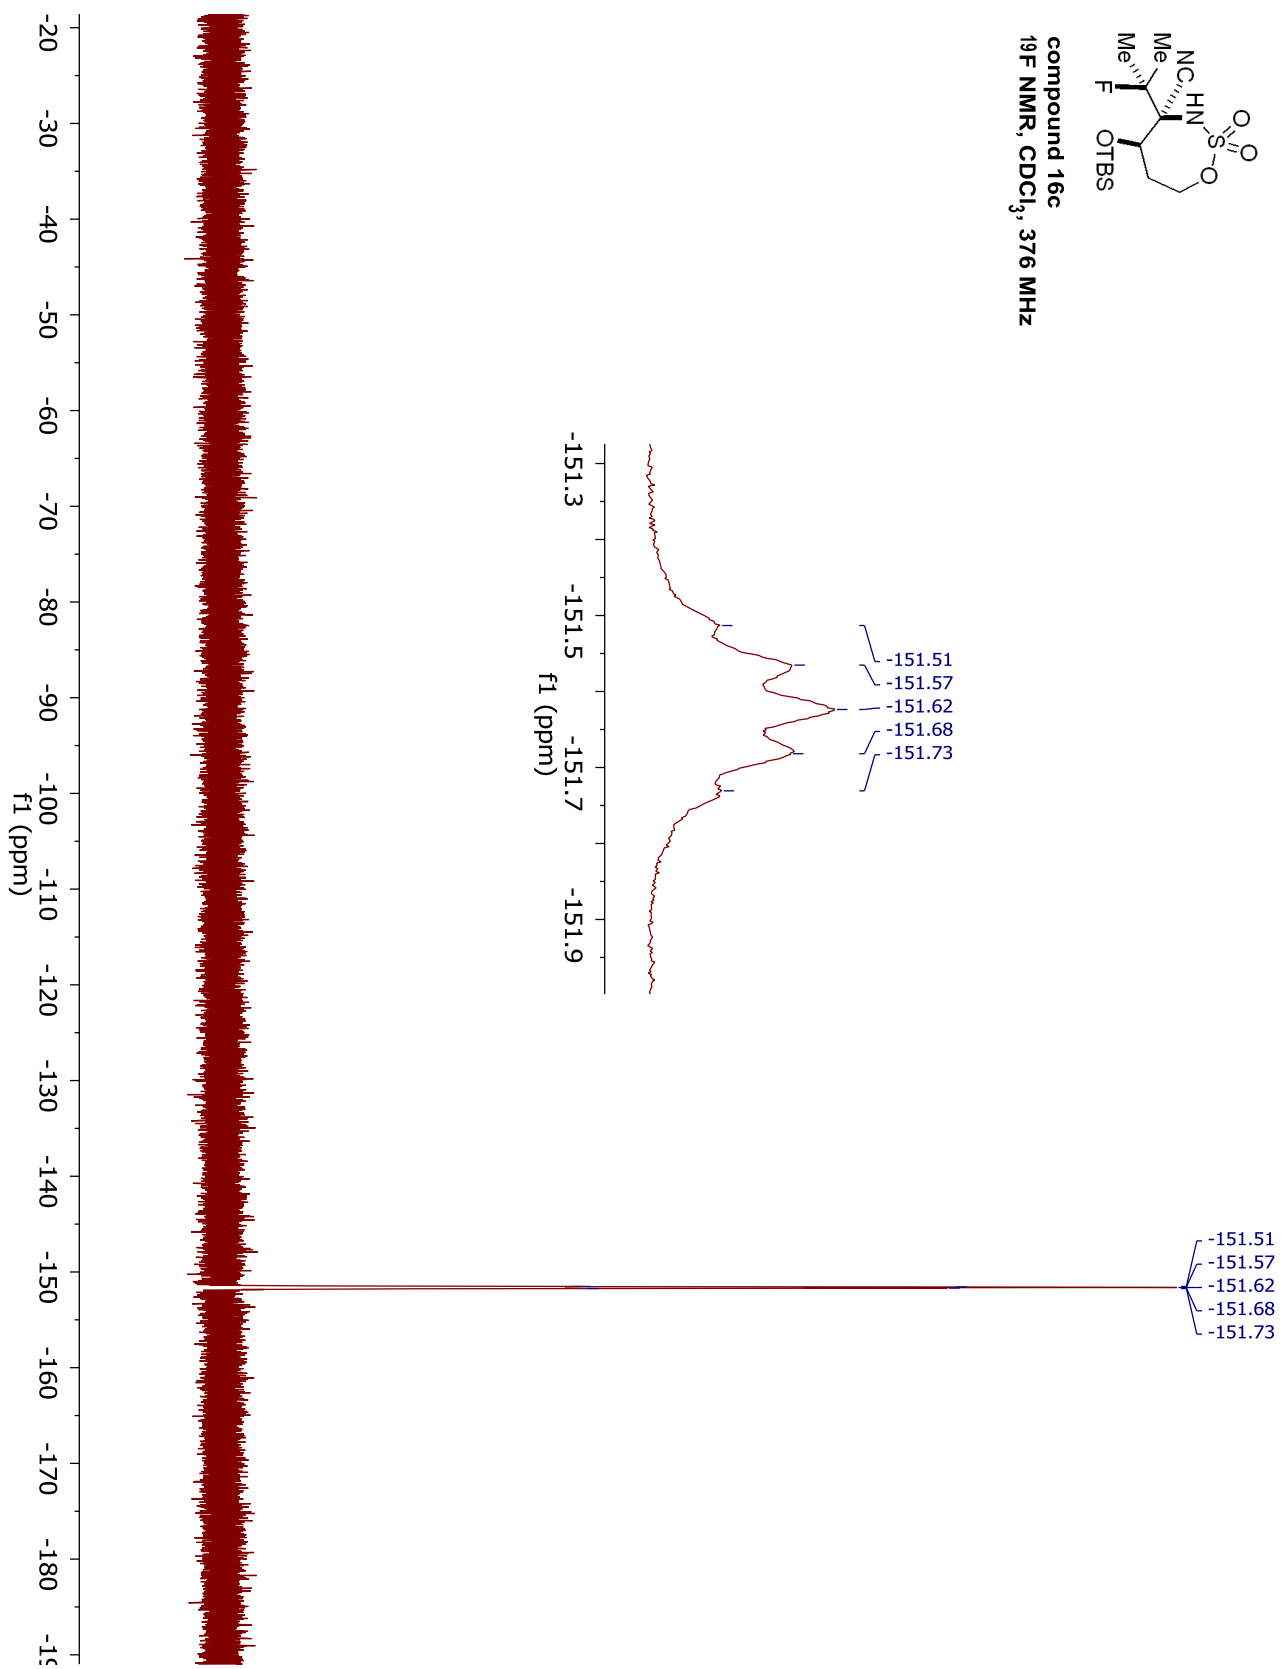

**<sup>1</sup>H NMR for compound 17a.**

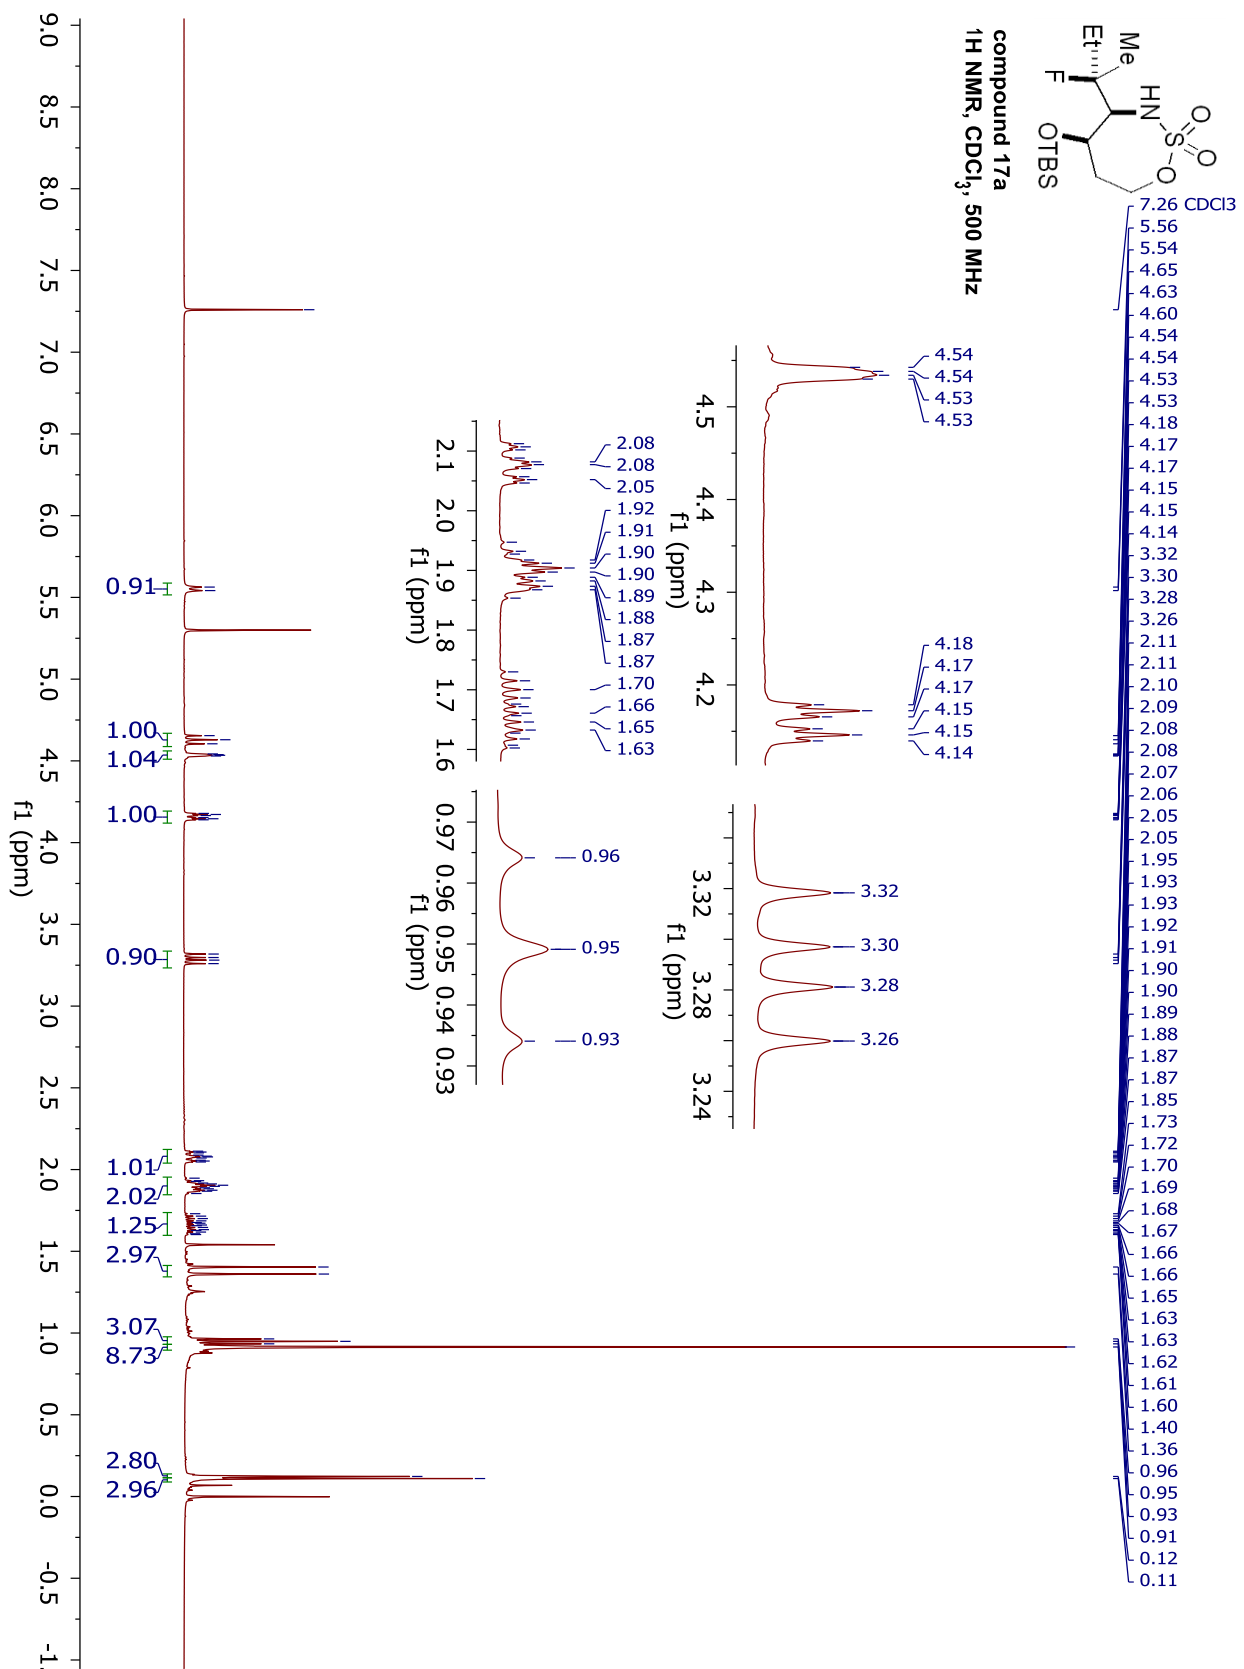

<sup>13</sup>C NMR for compound 17a.

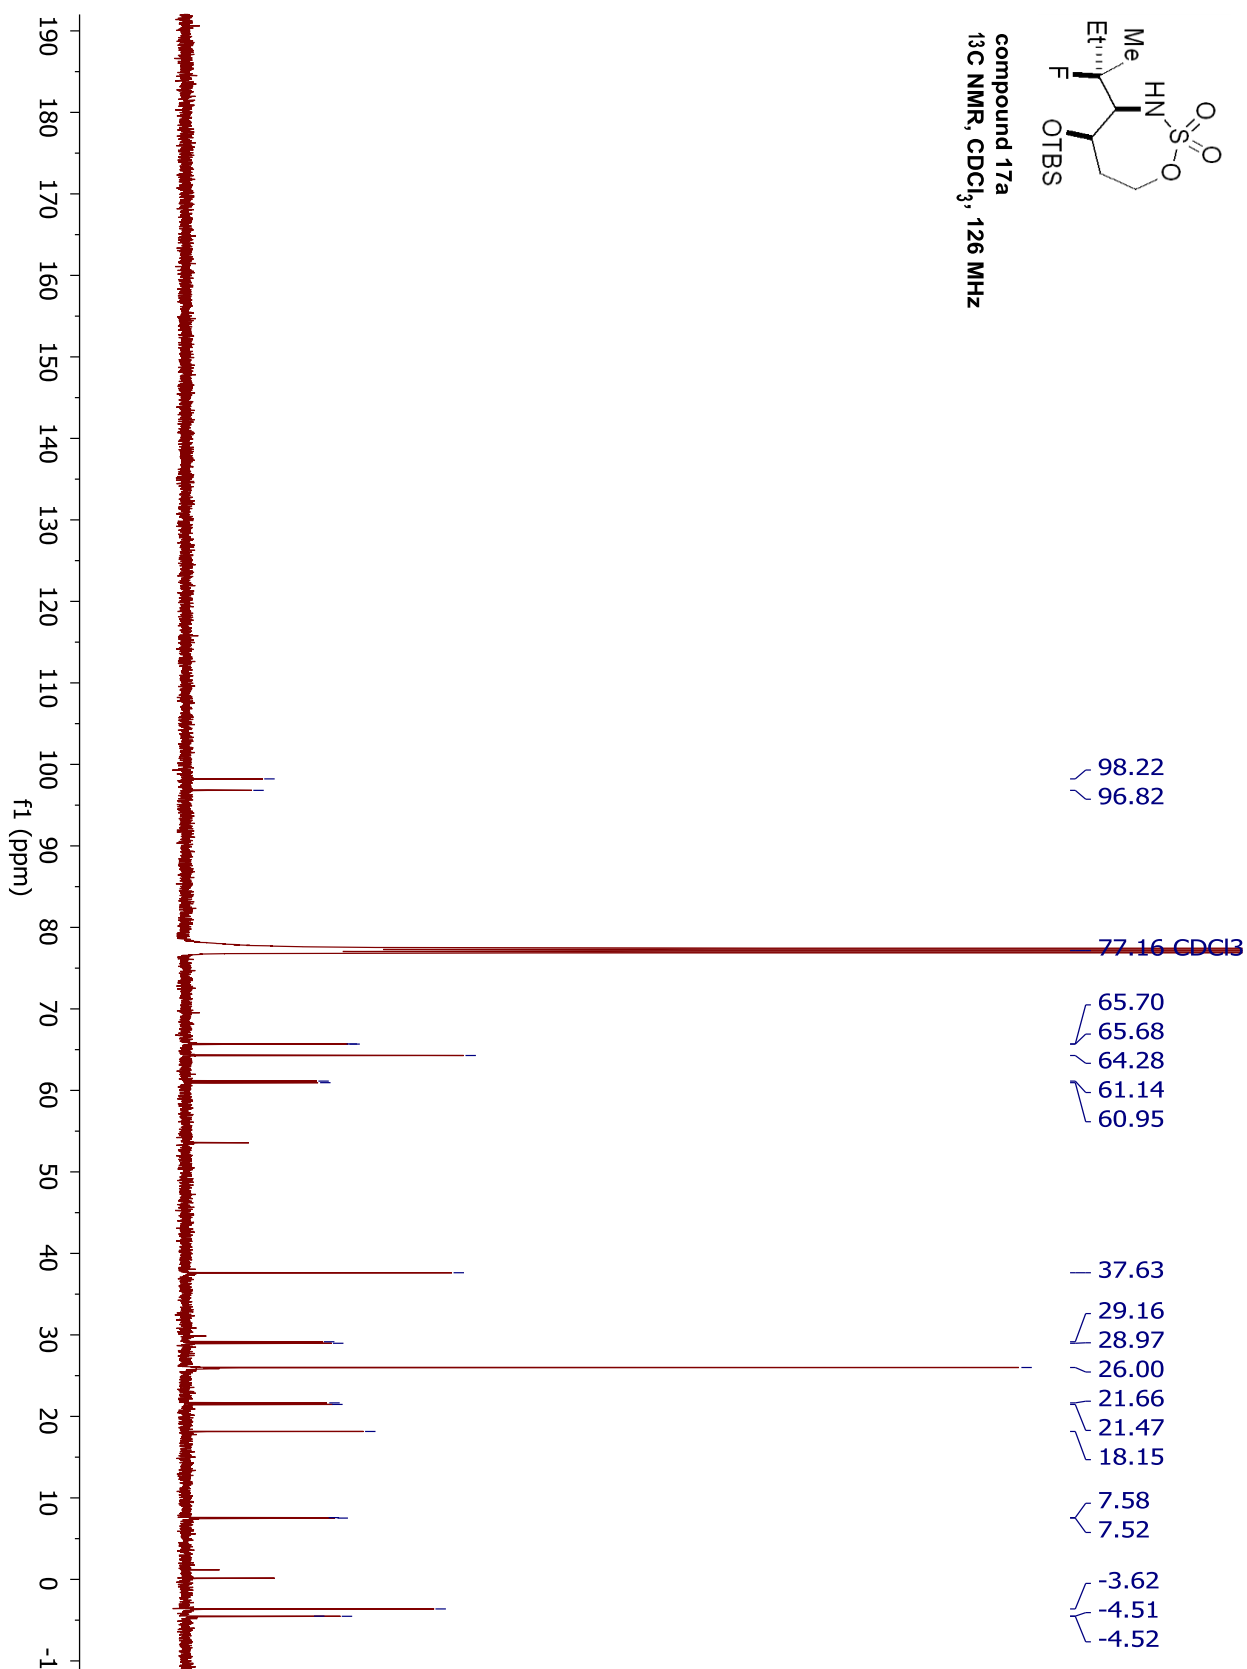

**<sup>19</sup>F NMR for compound 17a.**

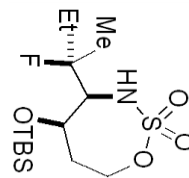

compound 17a  
<sup>19</sup>F NMR, CDCl<sub>3</sub>, 471 MHz

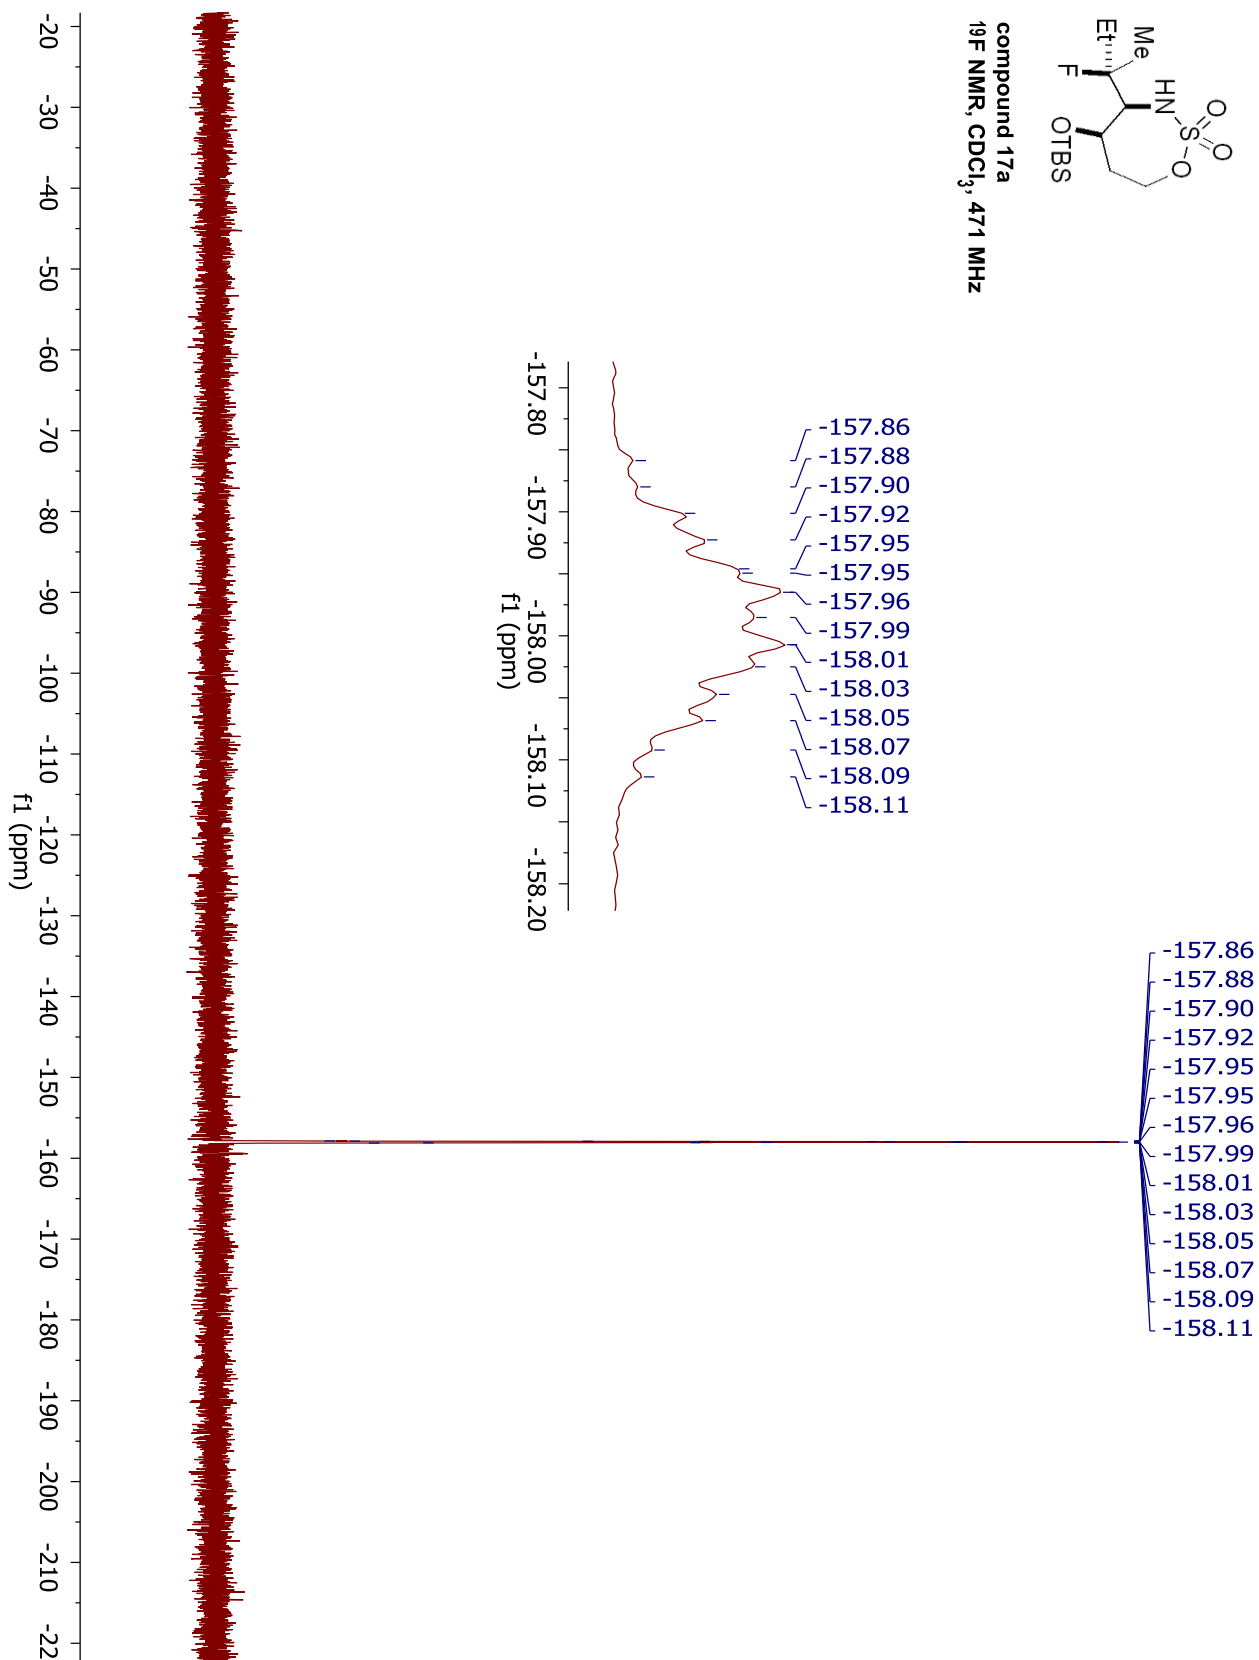

# $^1\text{H}$ NMR for compound 17b.

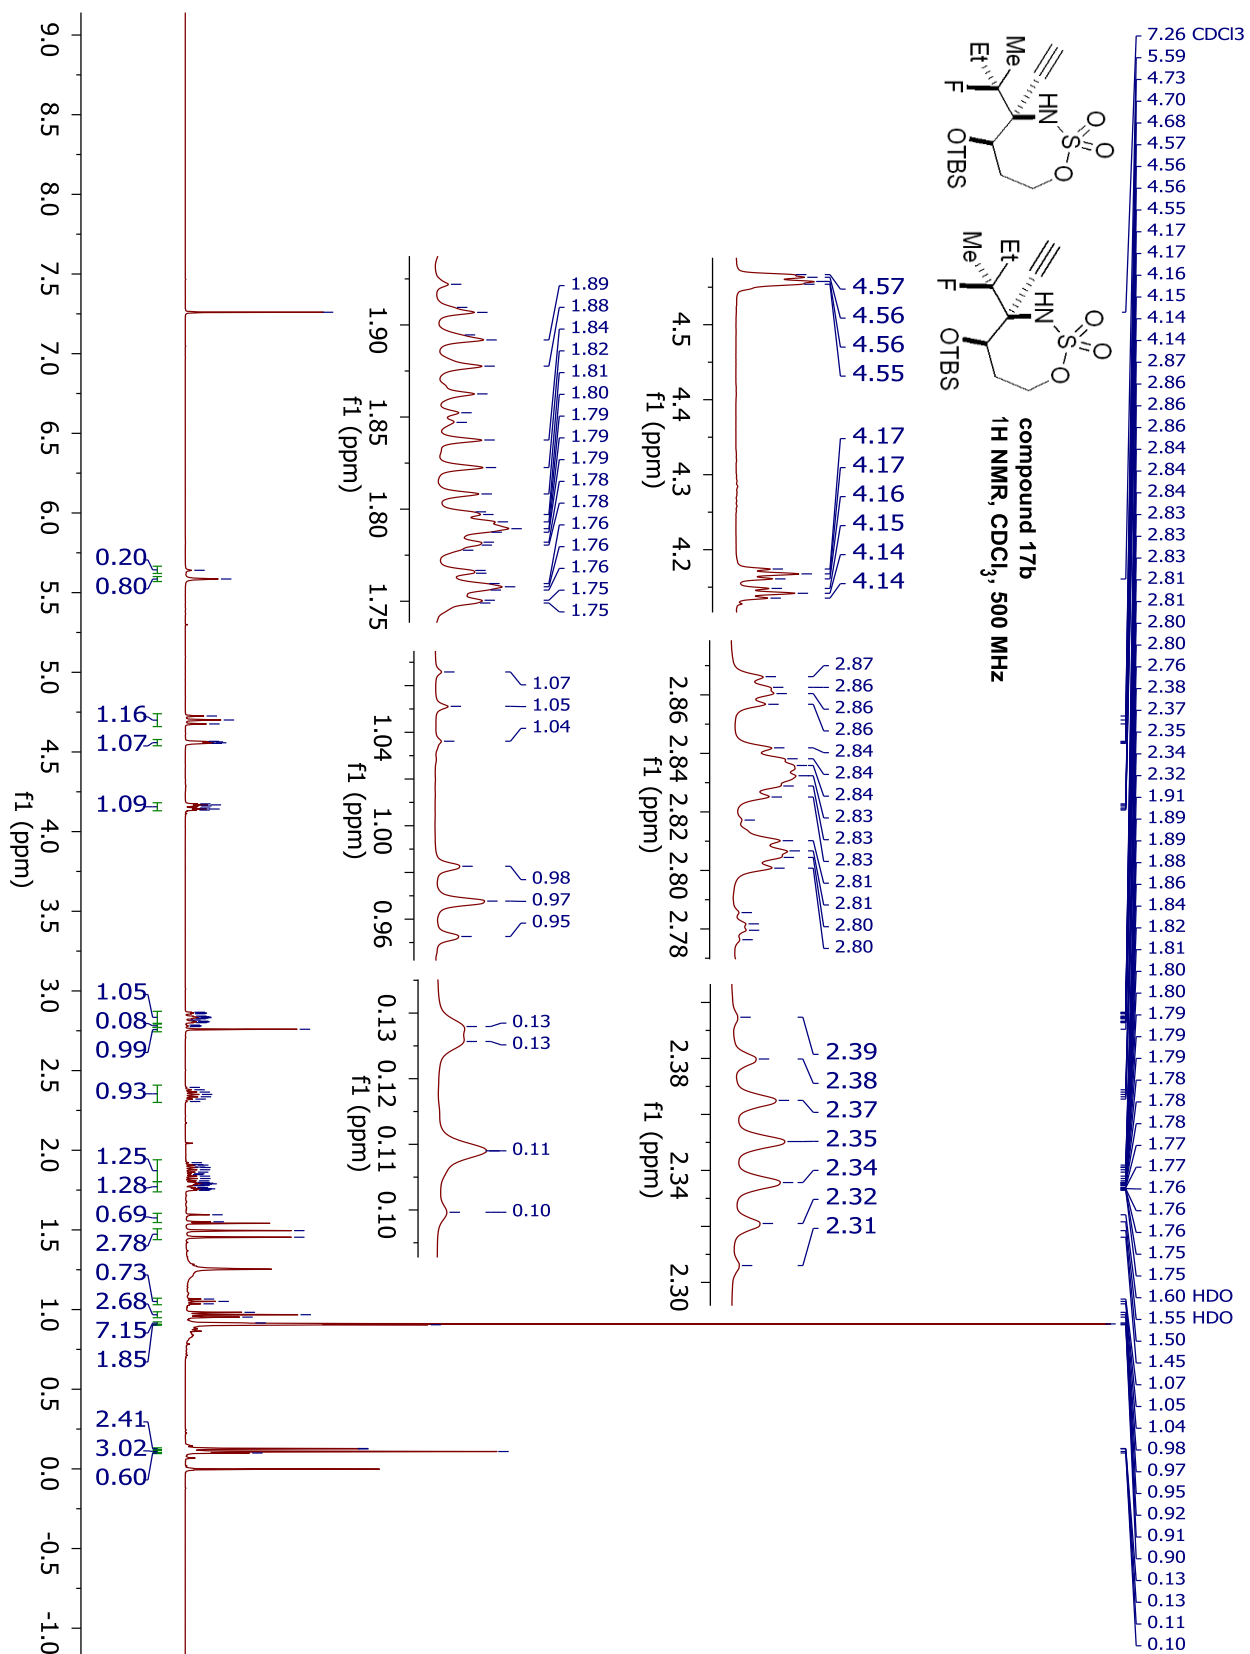



<sup>13</sup>C NMR for compound 17b.

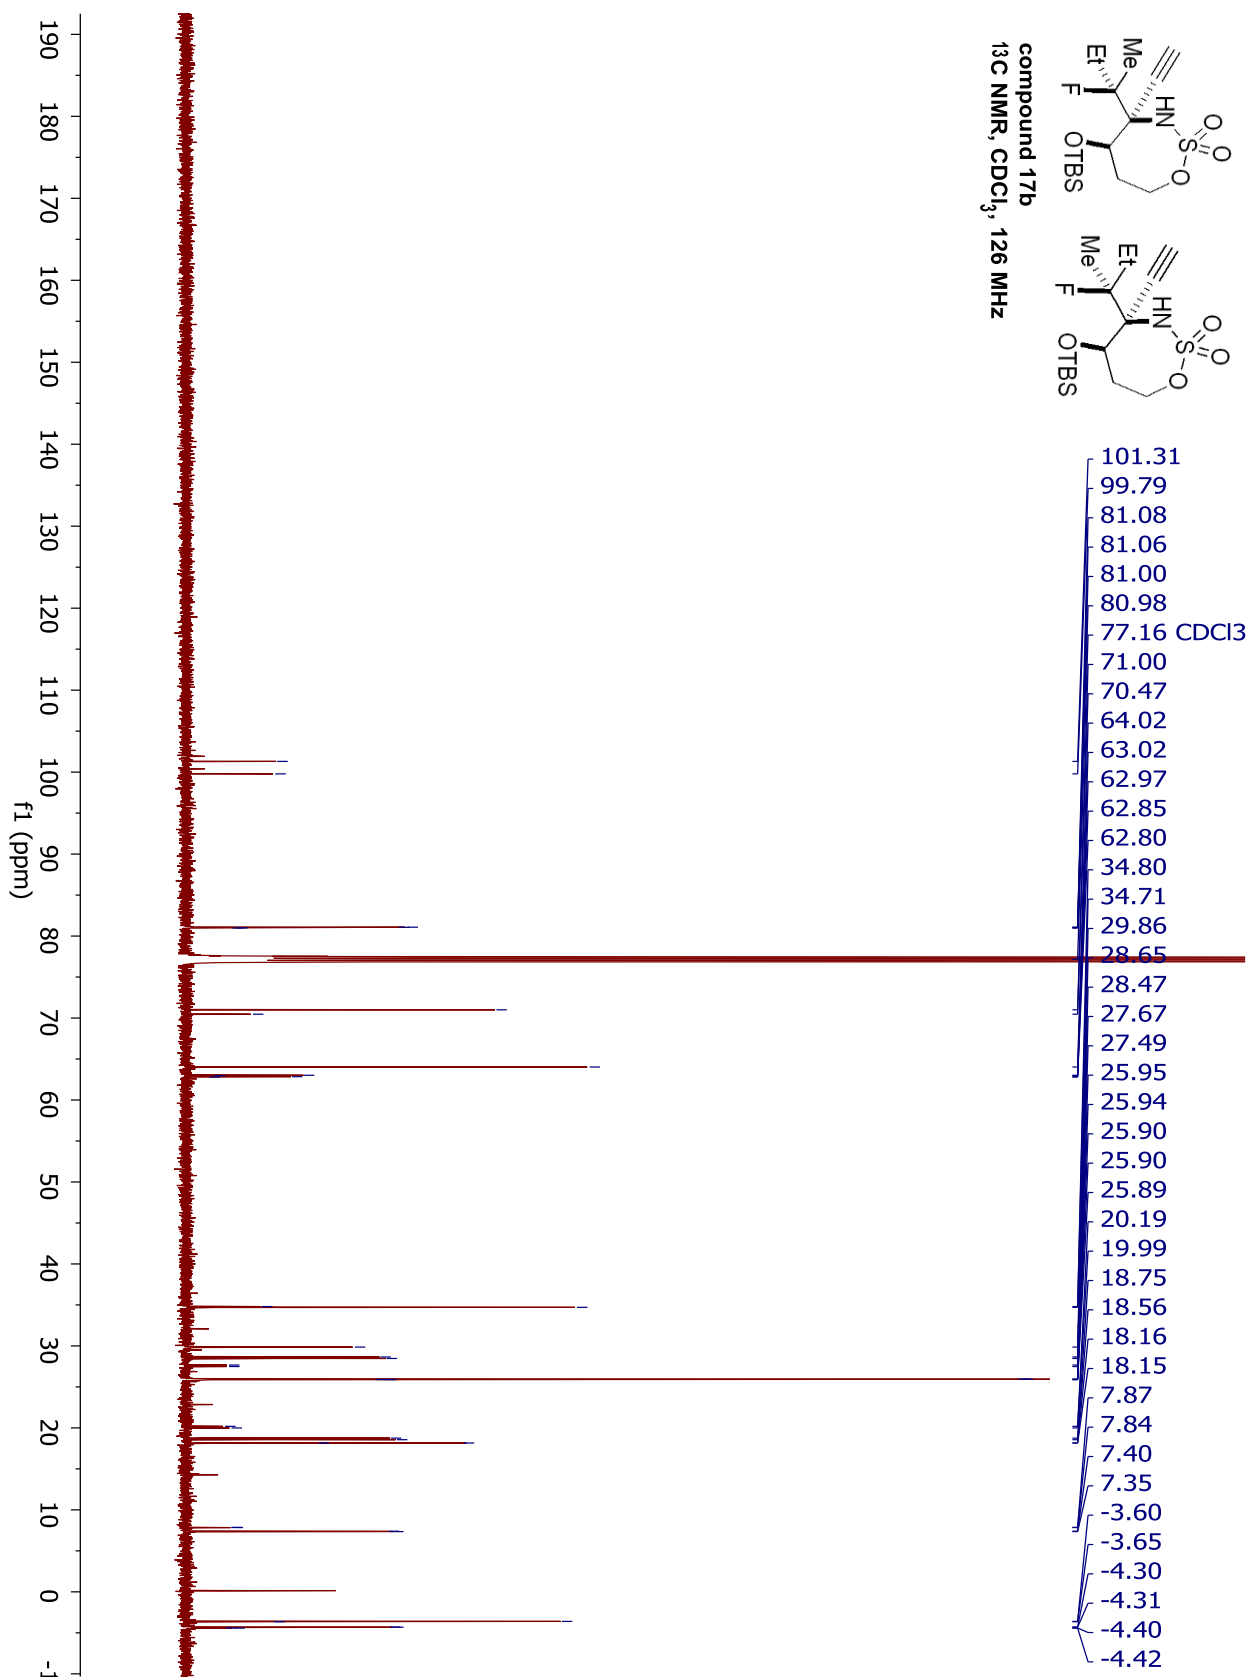

**<sup>19</sup>F NMR for compound 17b.**

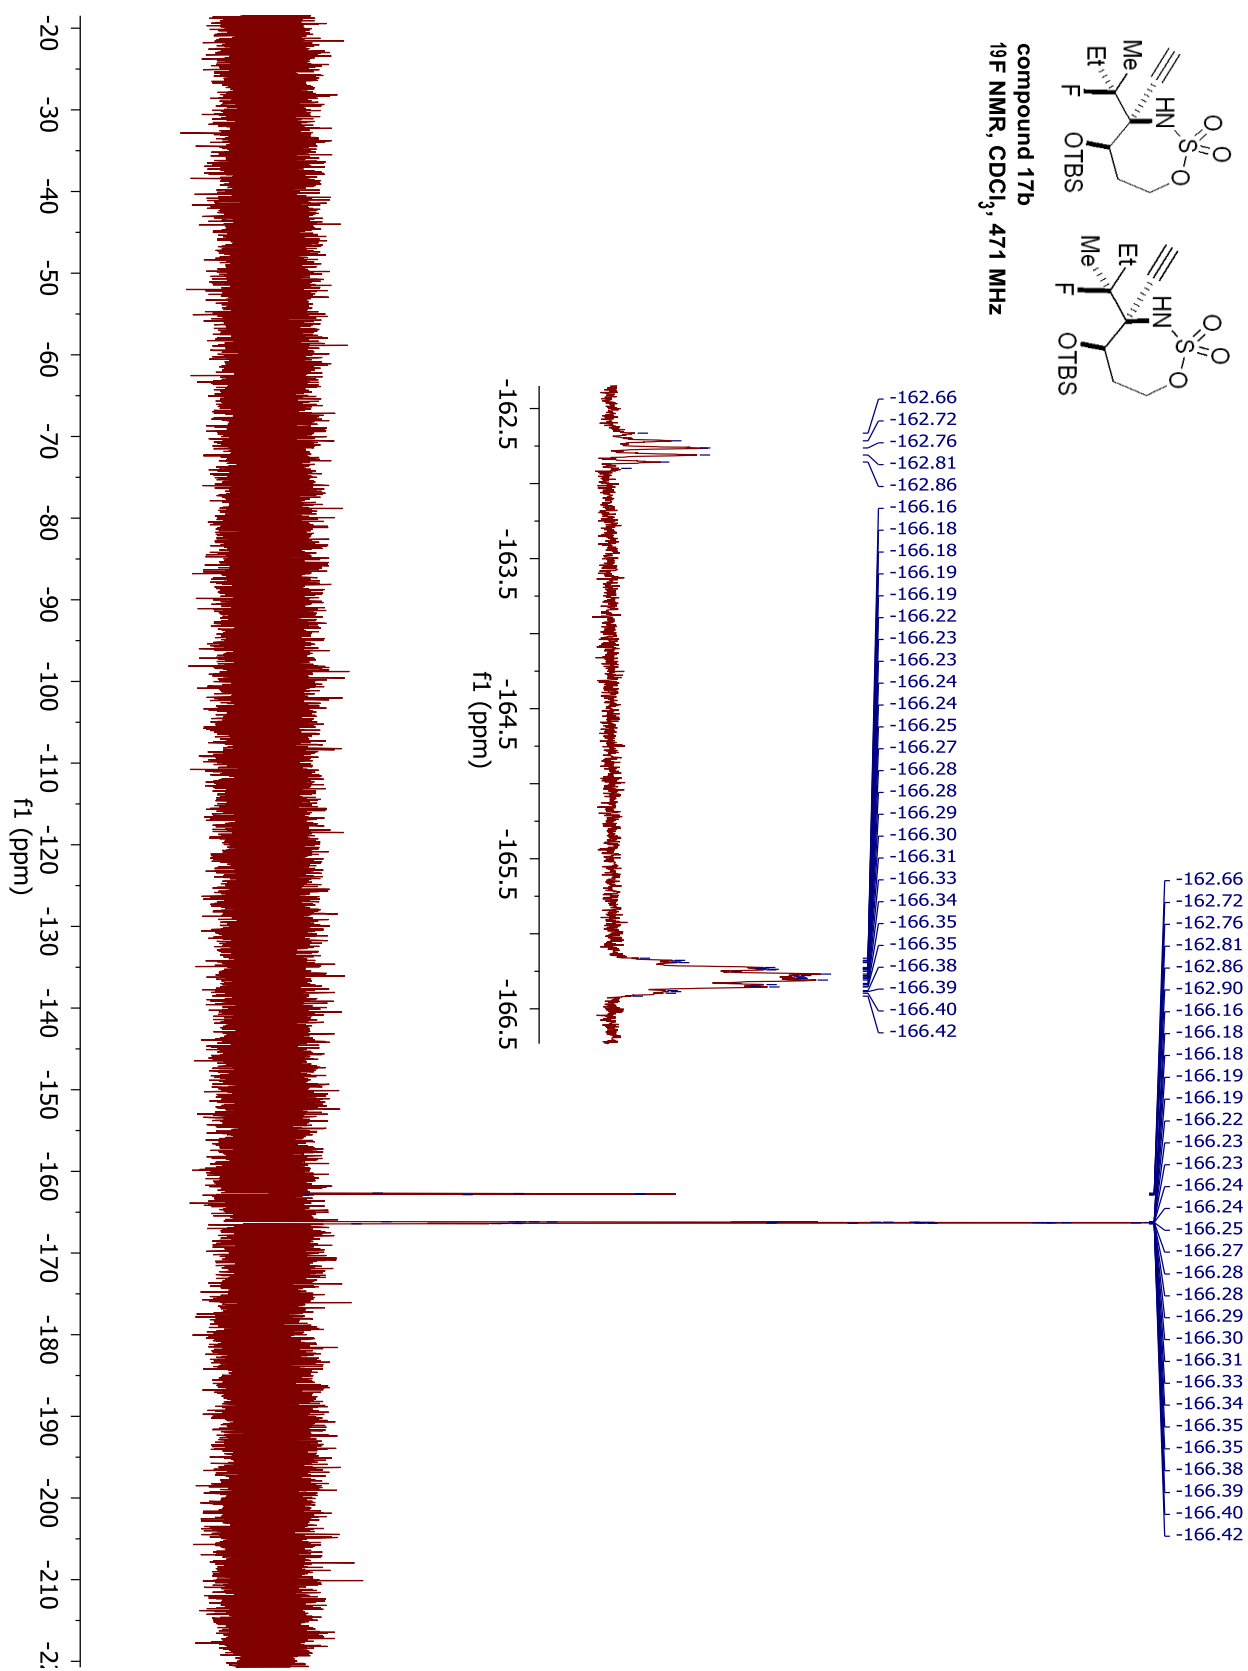

<sup>1</sup>H NMR for compound 17c.

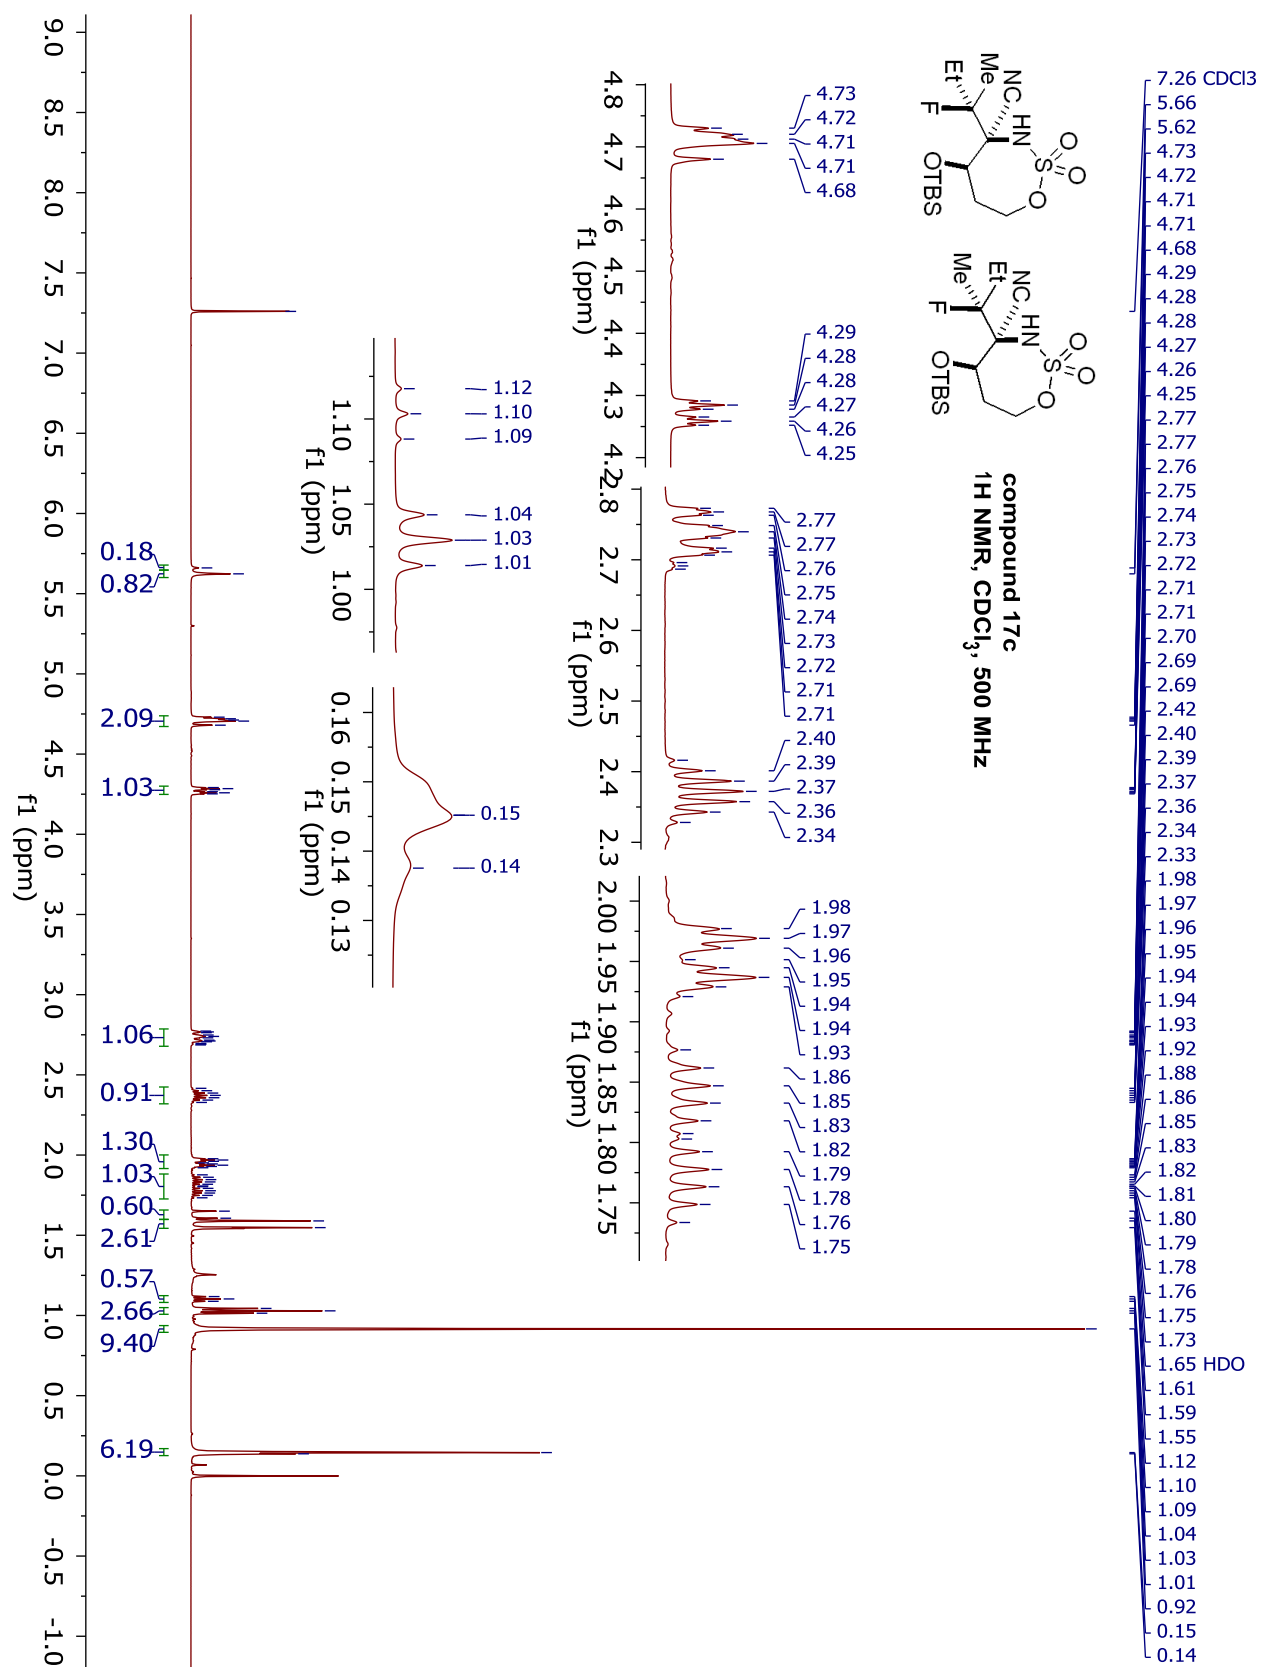

<sup>13</sup>C NMR for compound 17c.

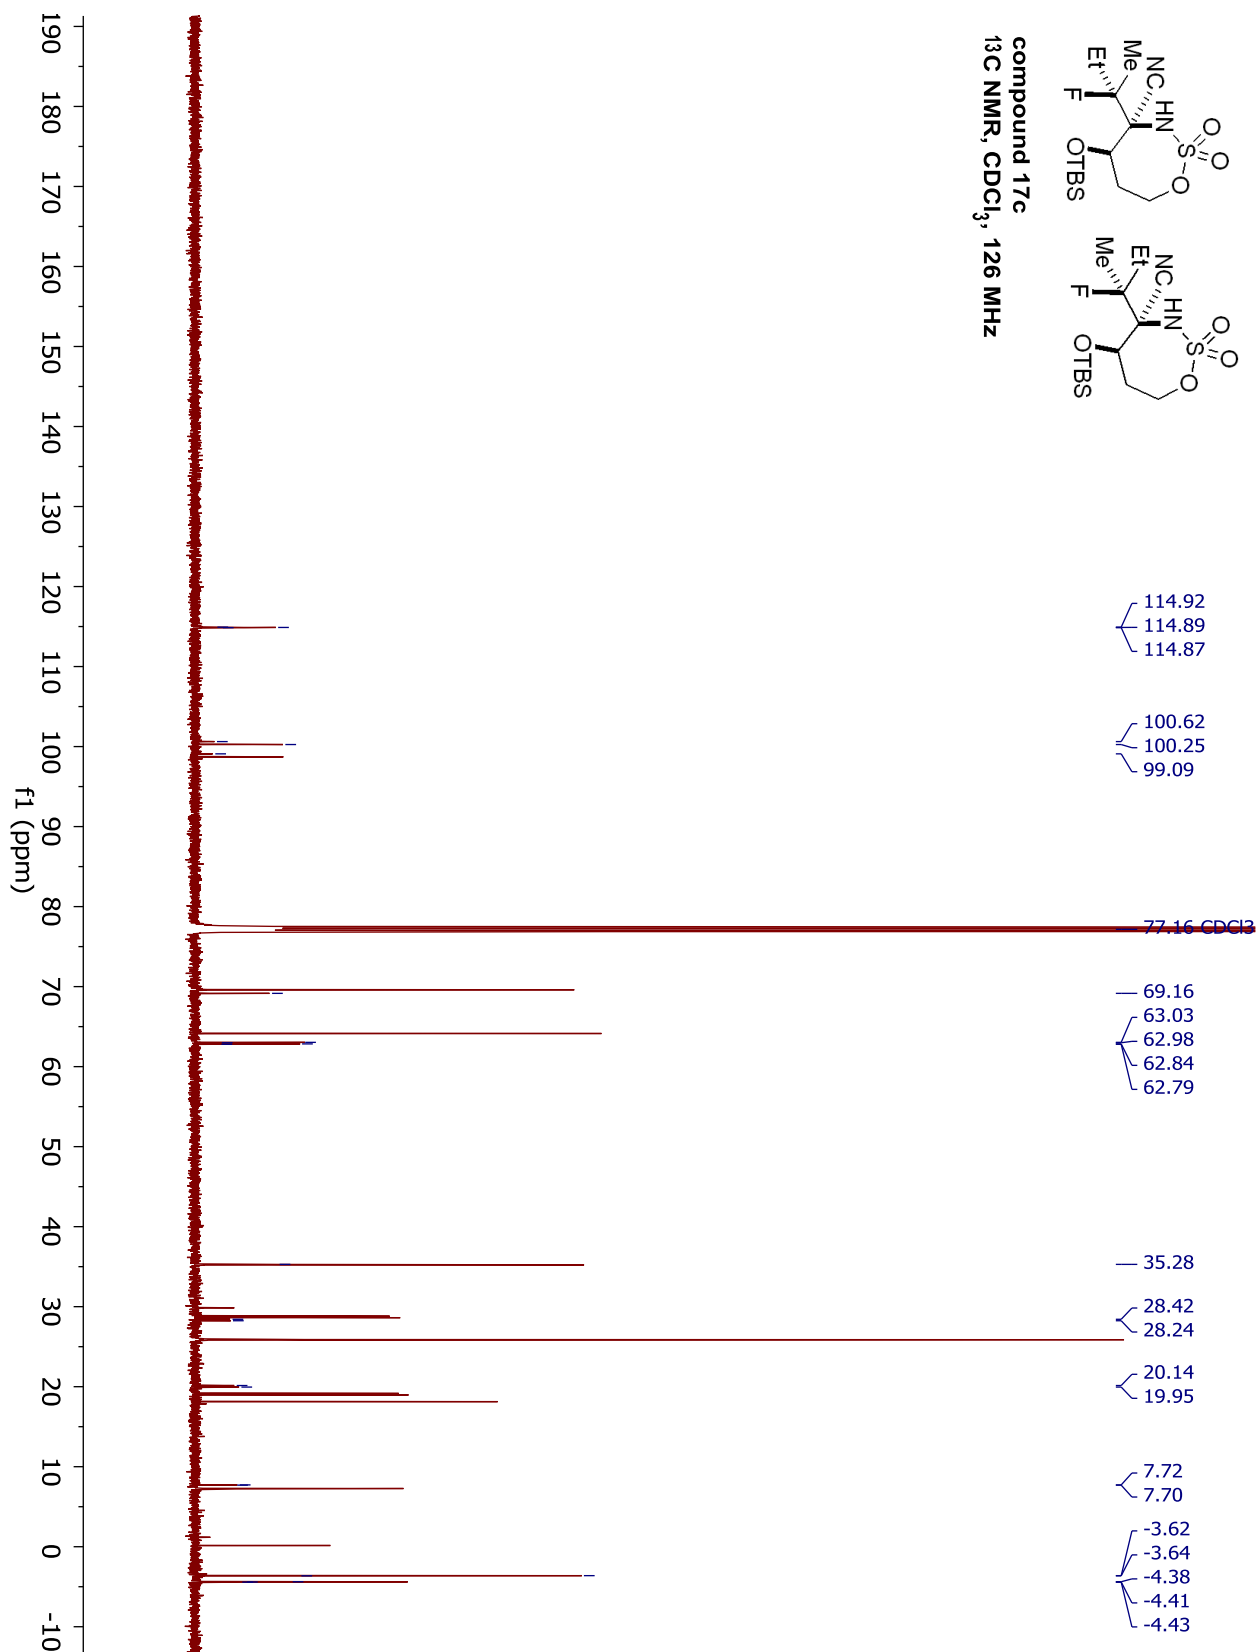

<sup>19</sup>F NMR for compound 17c.

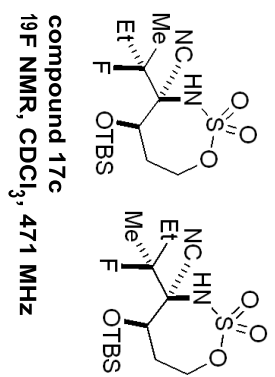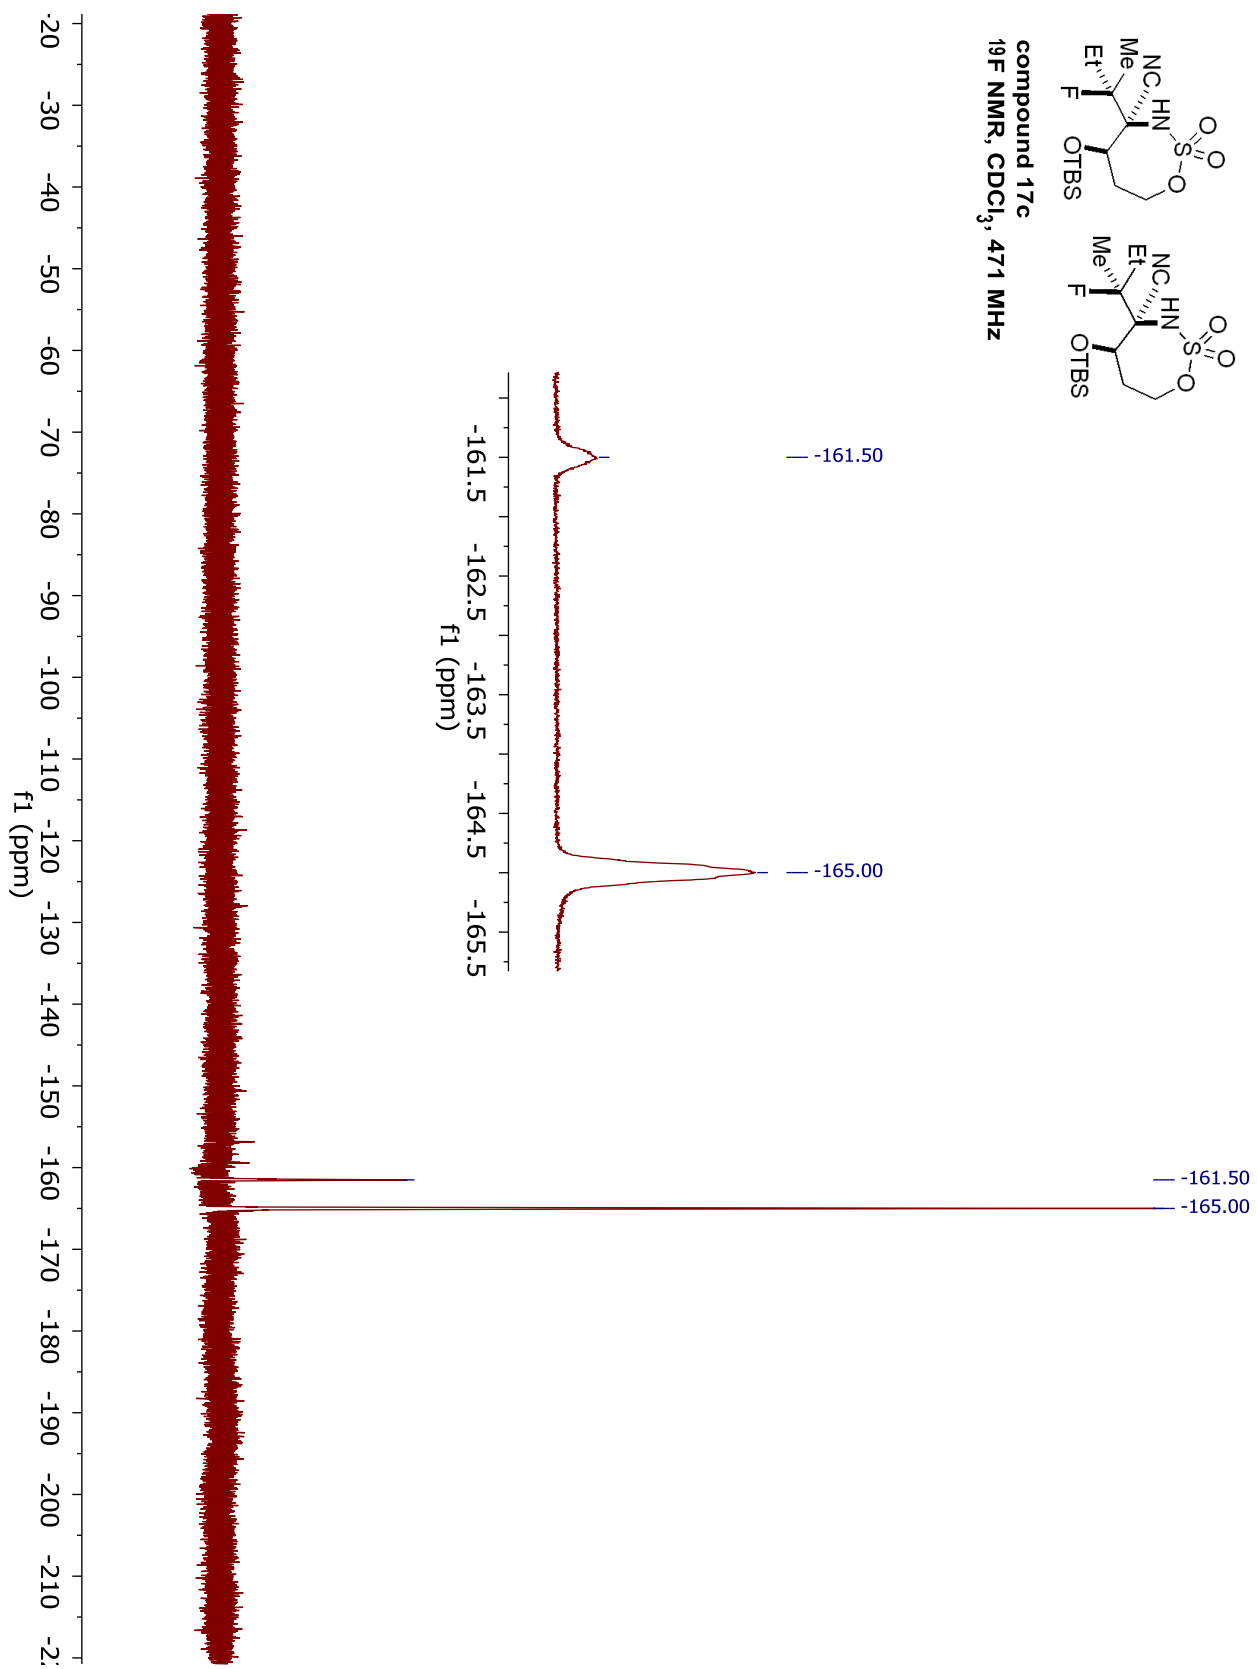

**<sup>1</sup>H NMR for compound 18a.**

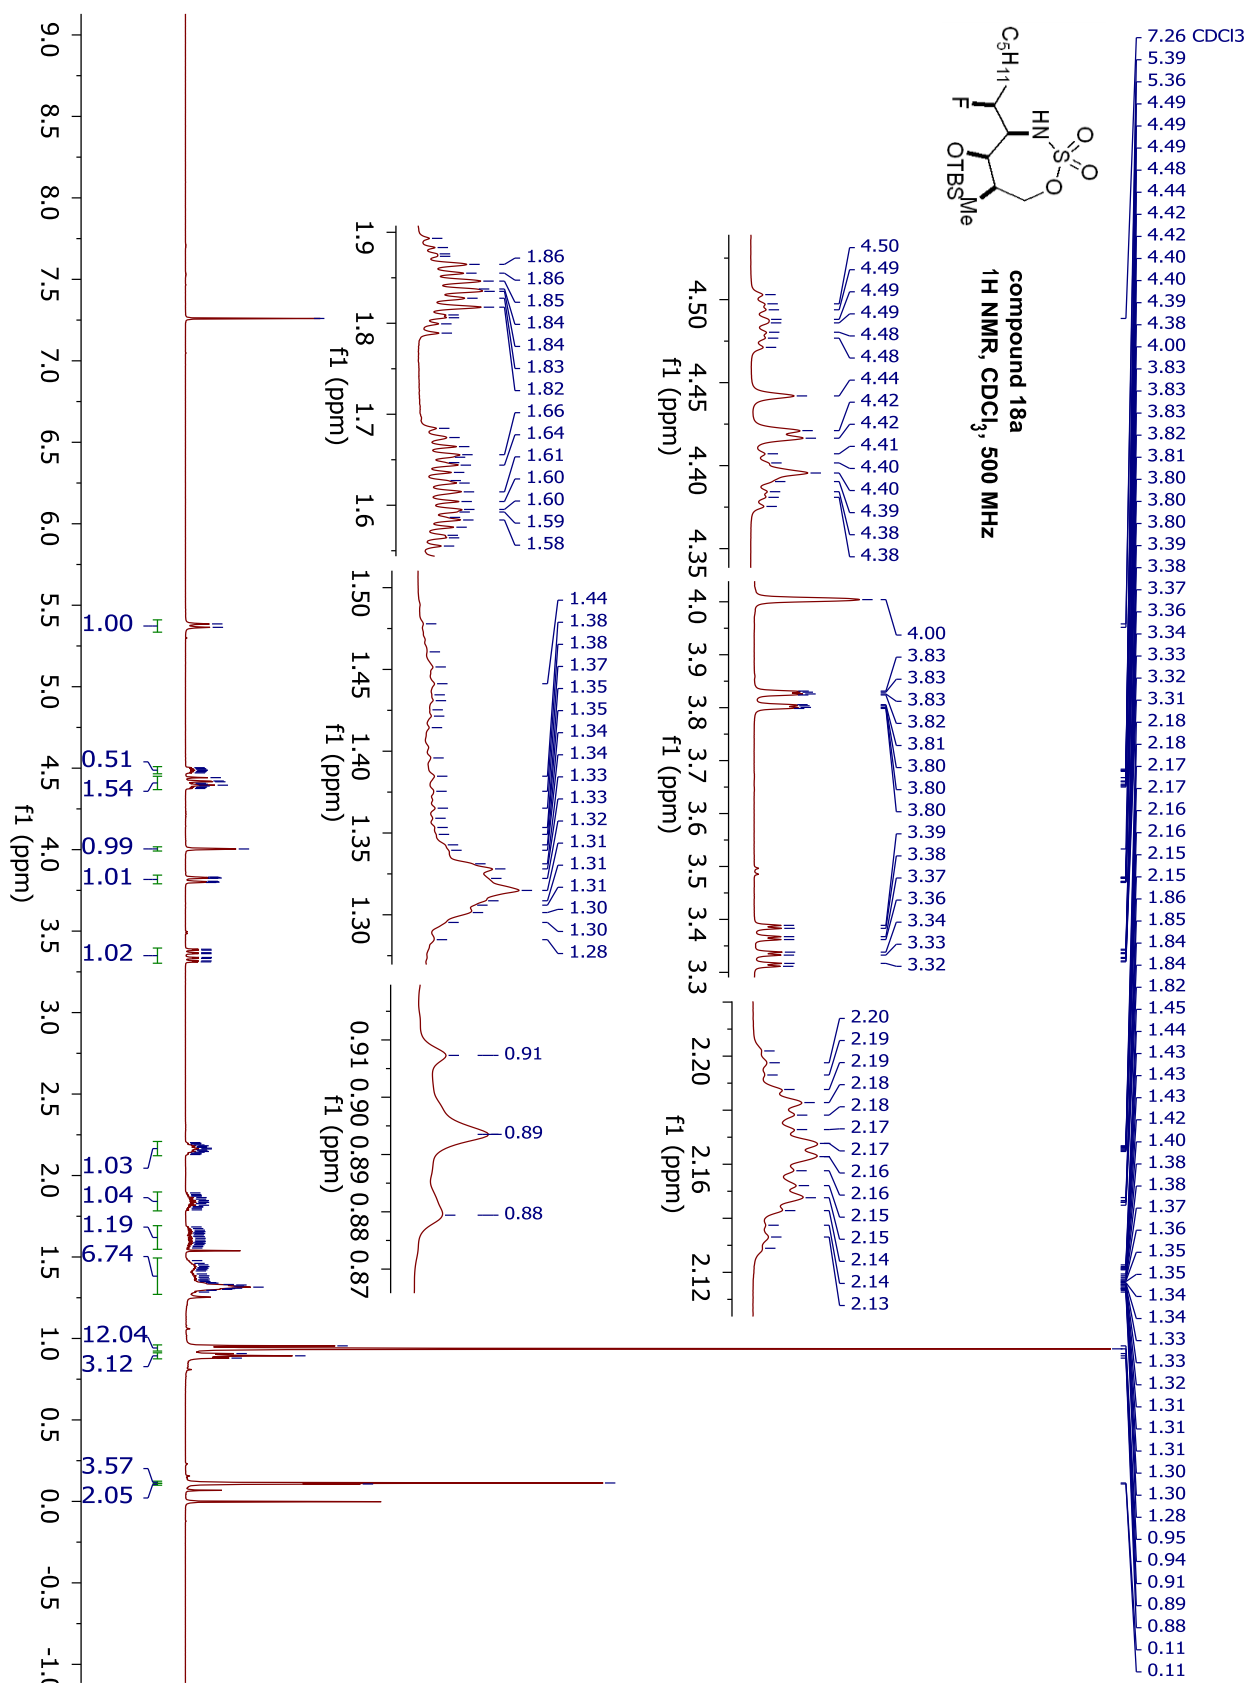

<sup>13</sup>C NMR for compound 18a.

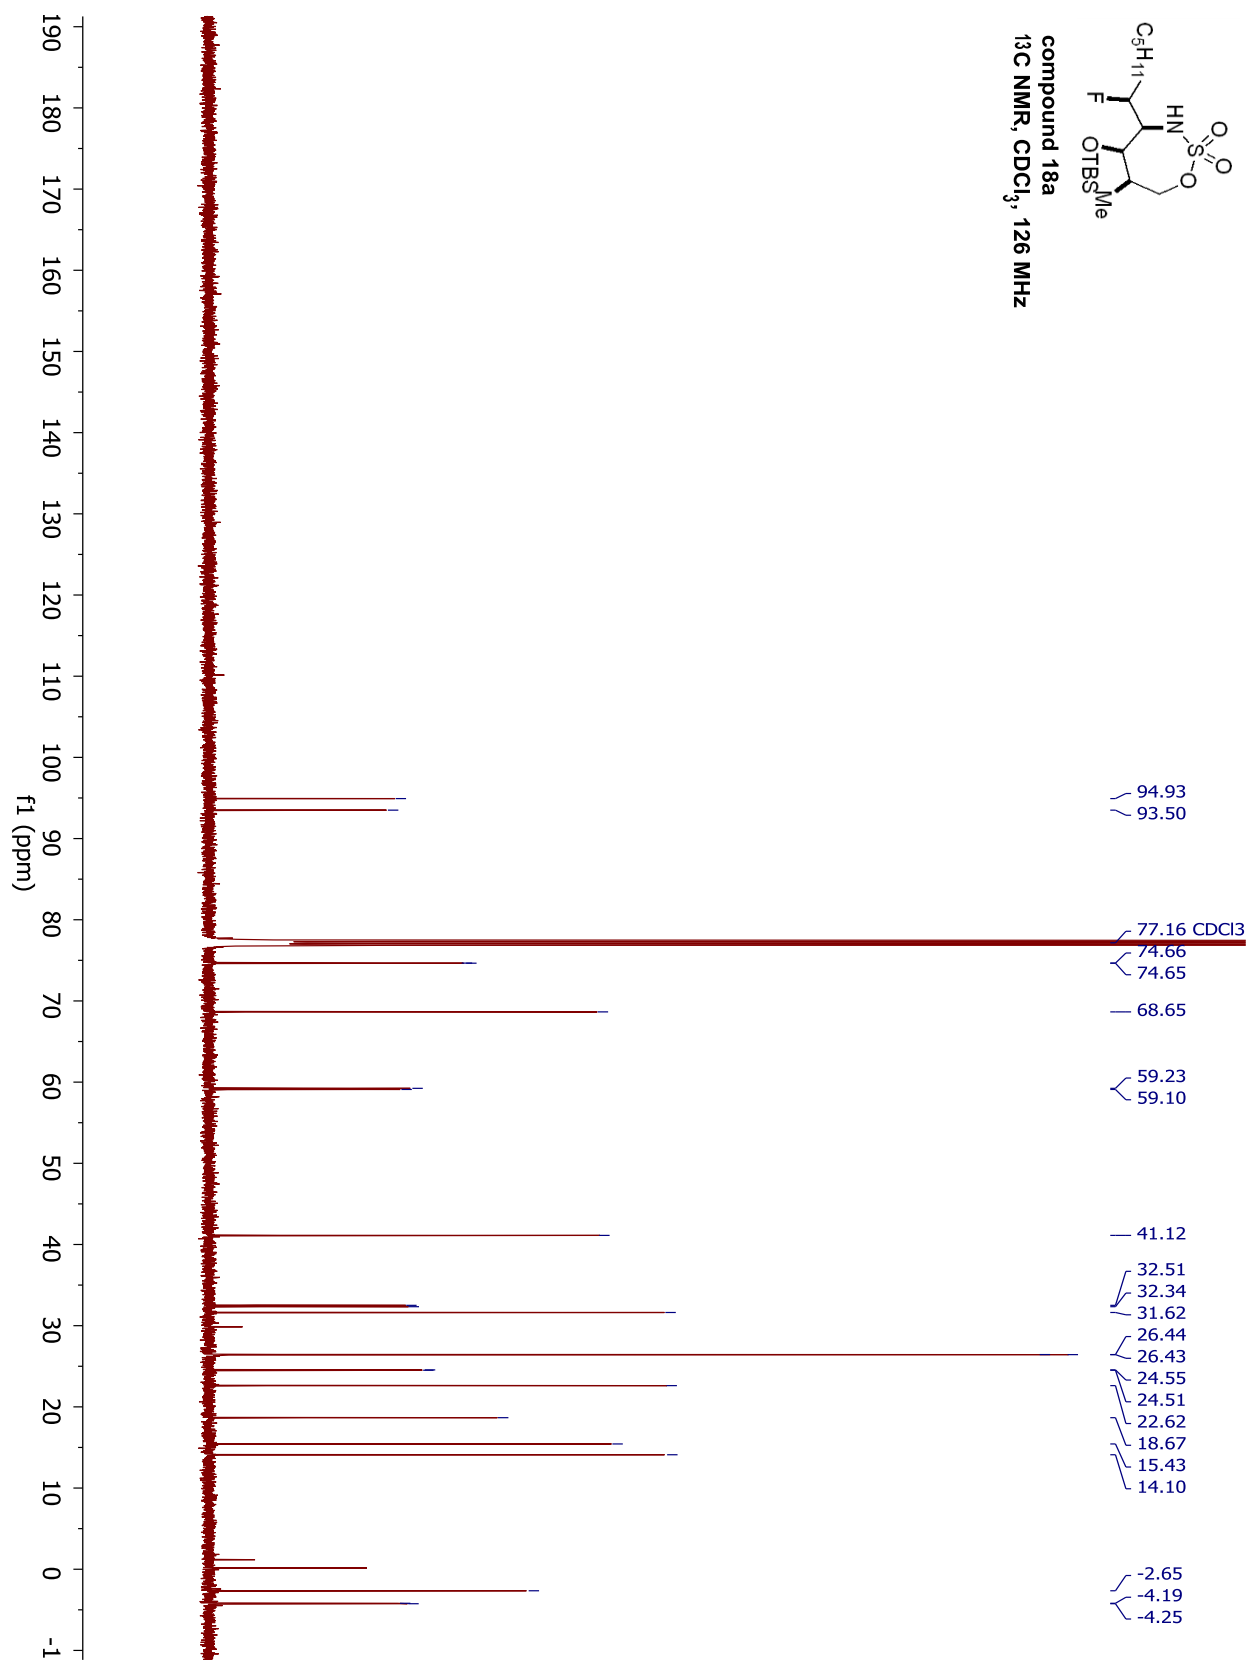

**<sup>19</sup>F NMR for compound 18a.**

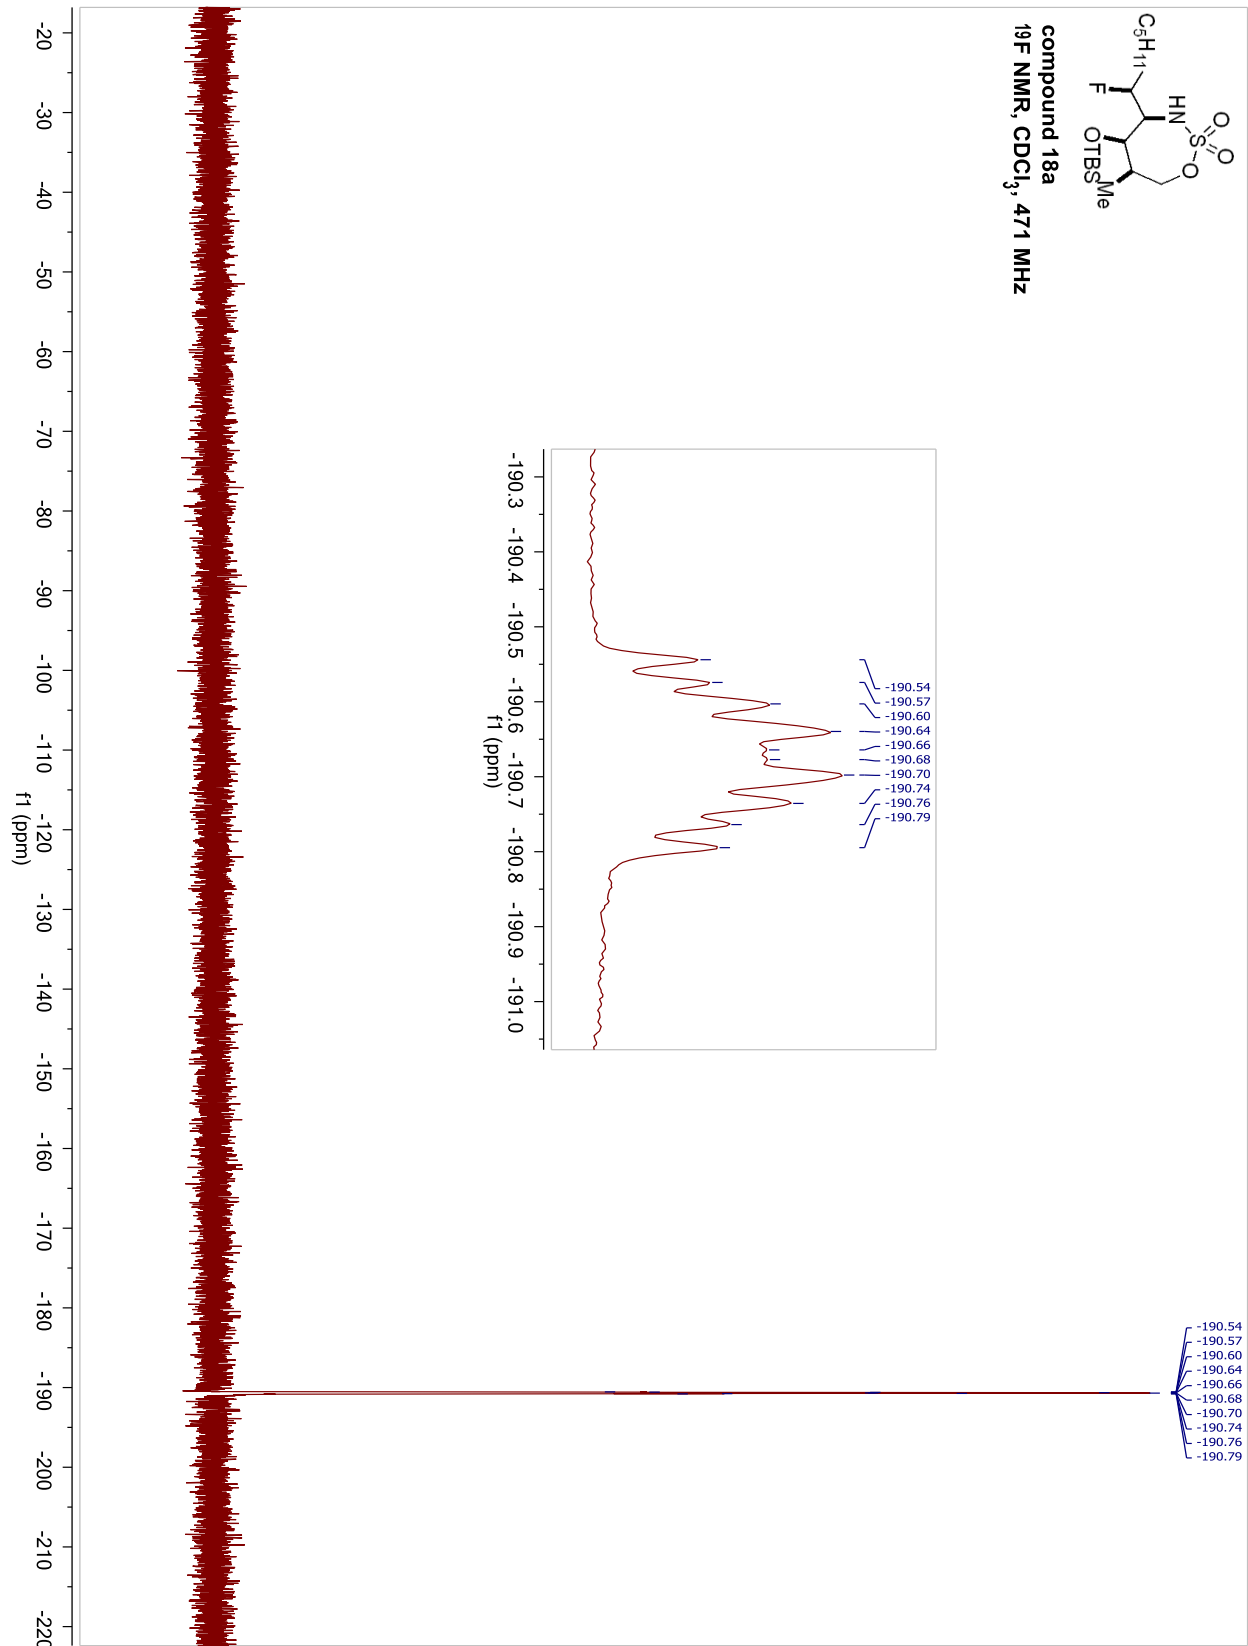



<sup>1</sup>H NMR for compound 19a.

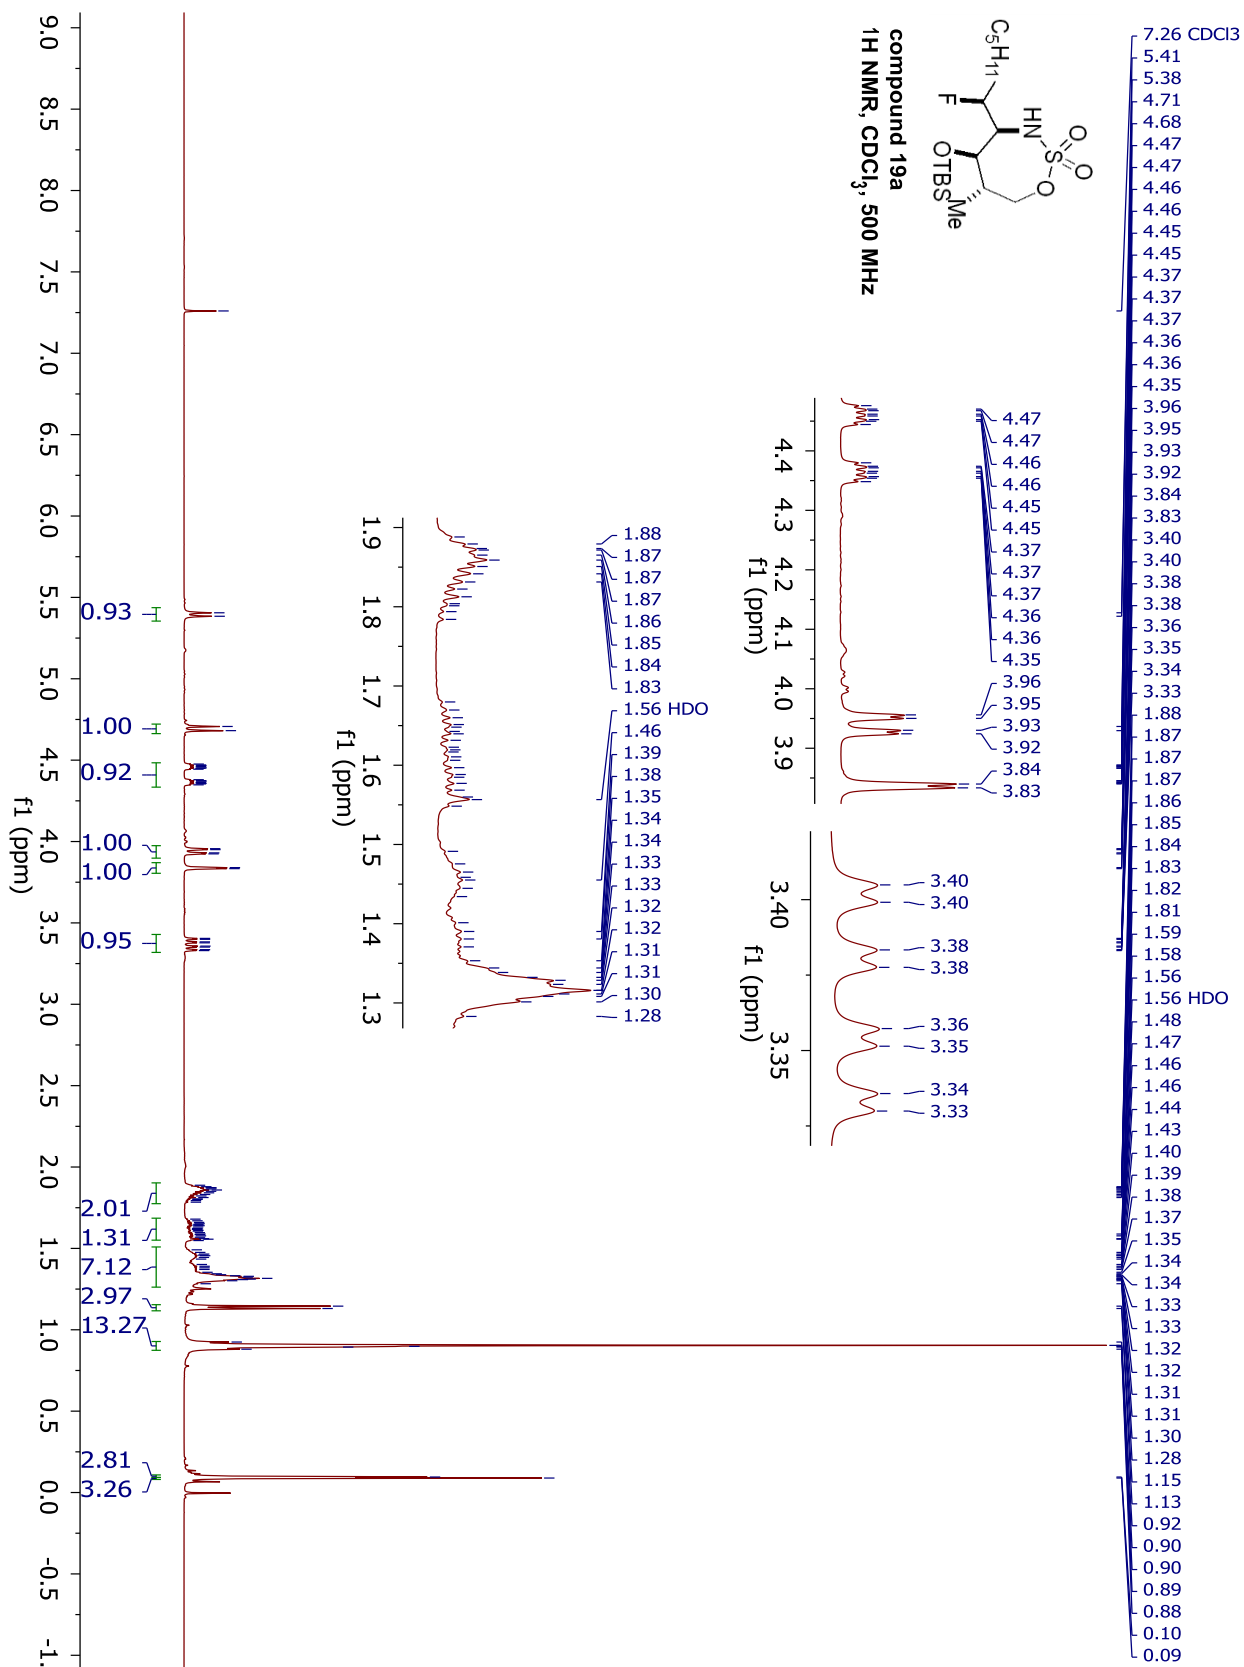

<sup>13</sup>C NMR for compound 19a.

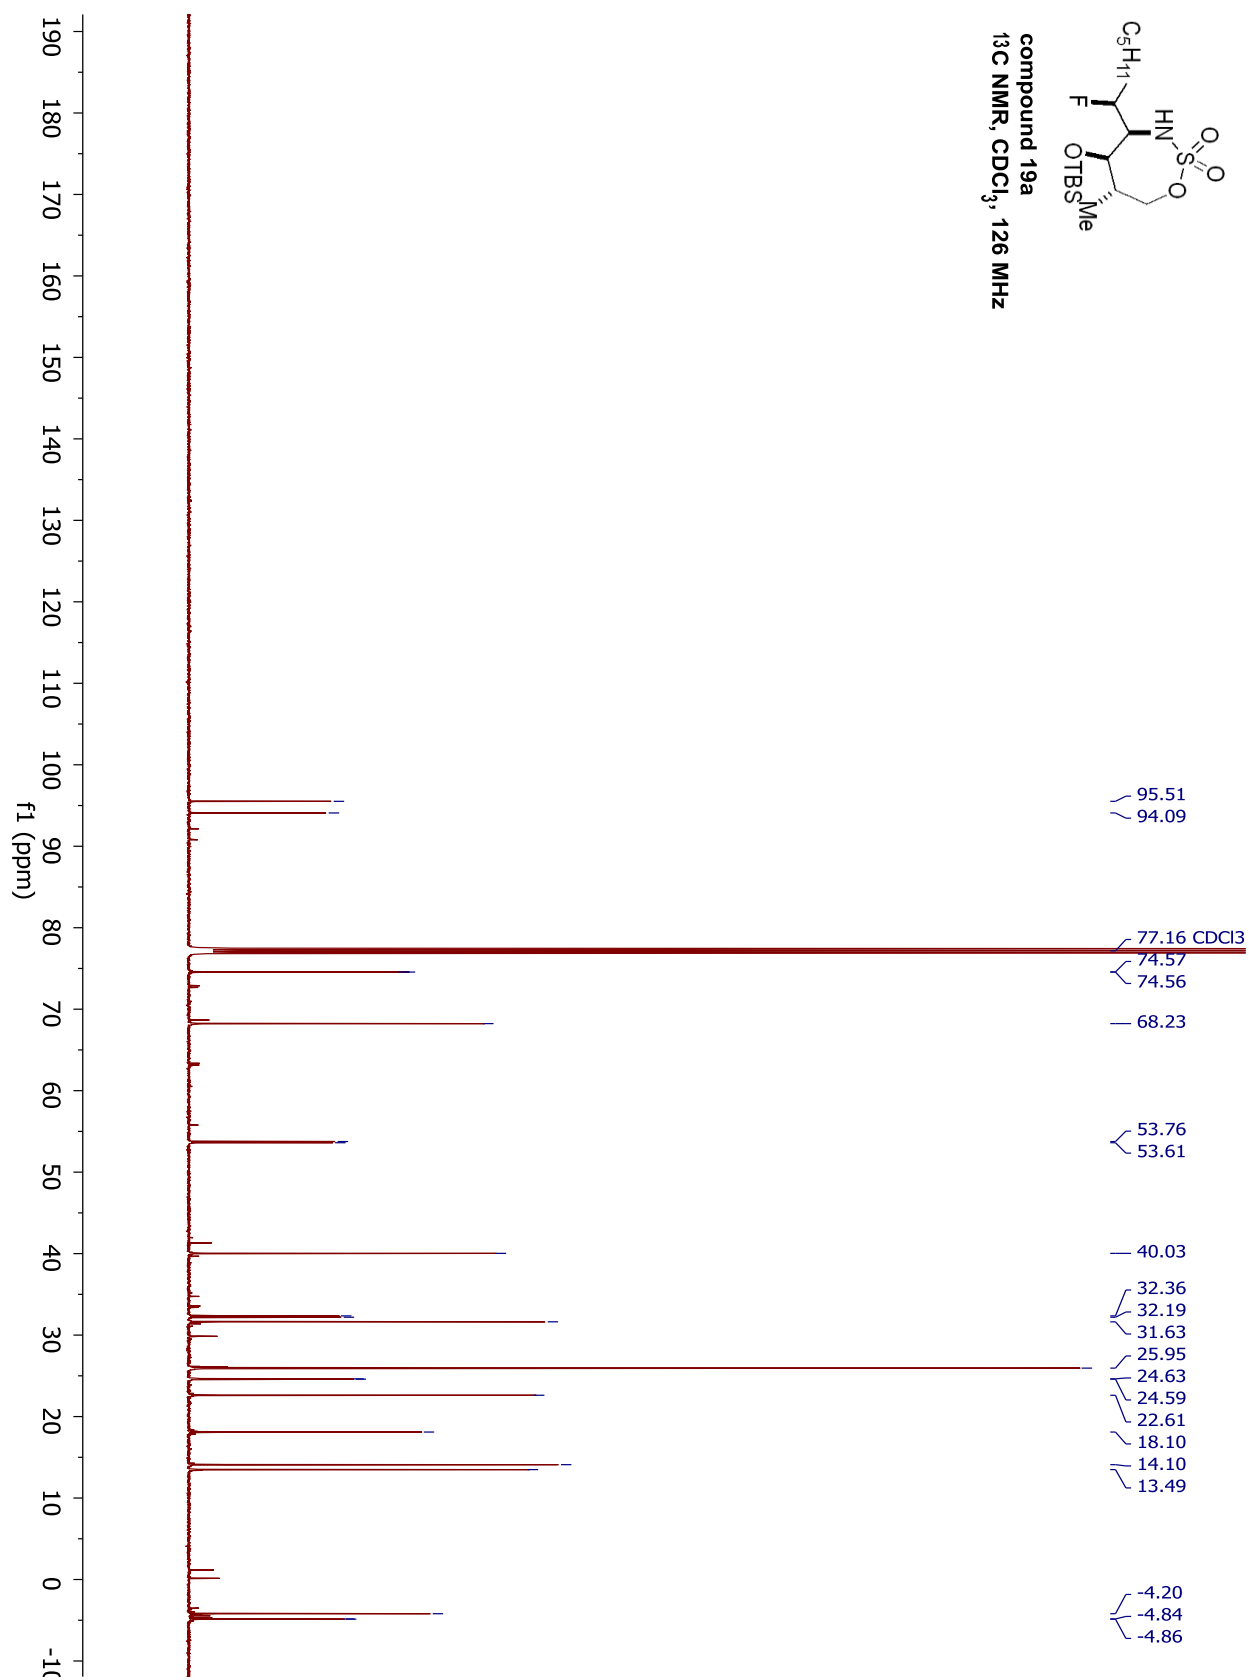

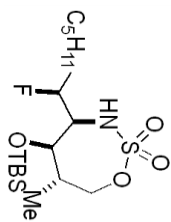

compound 19a  
<sup>19</sup>F NMR, CDCl<sub>3</sub>, 471 MHz

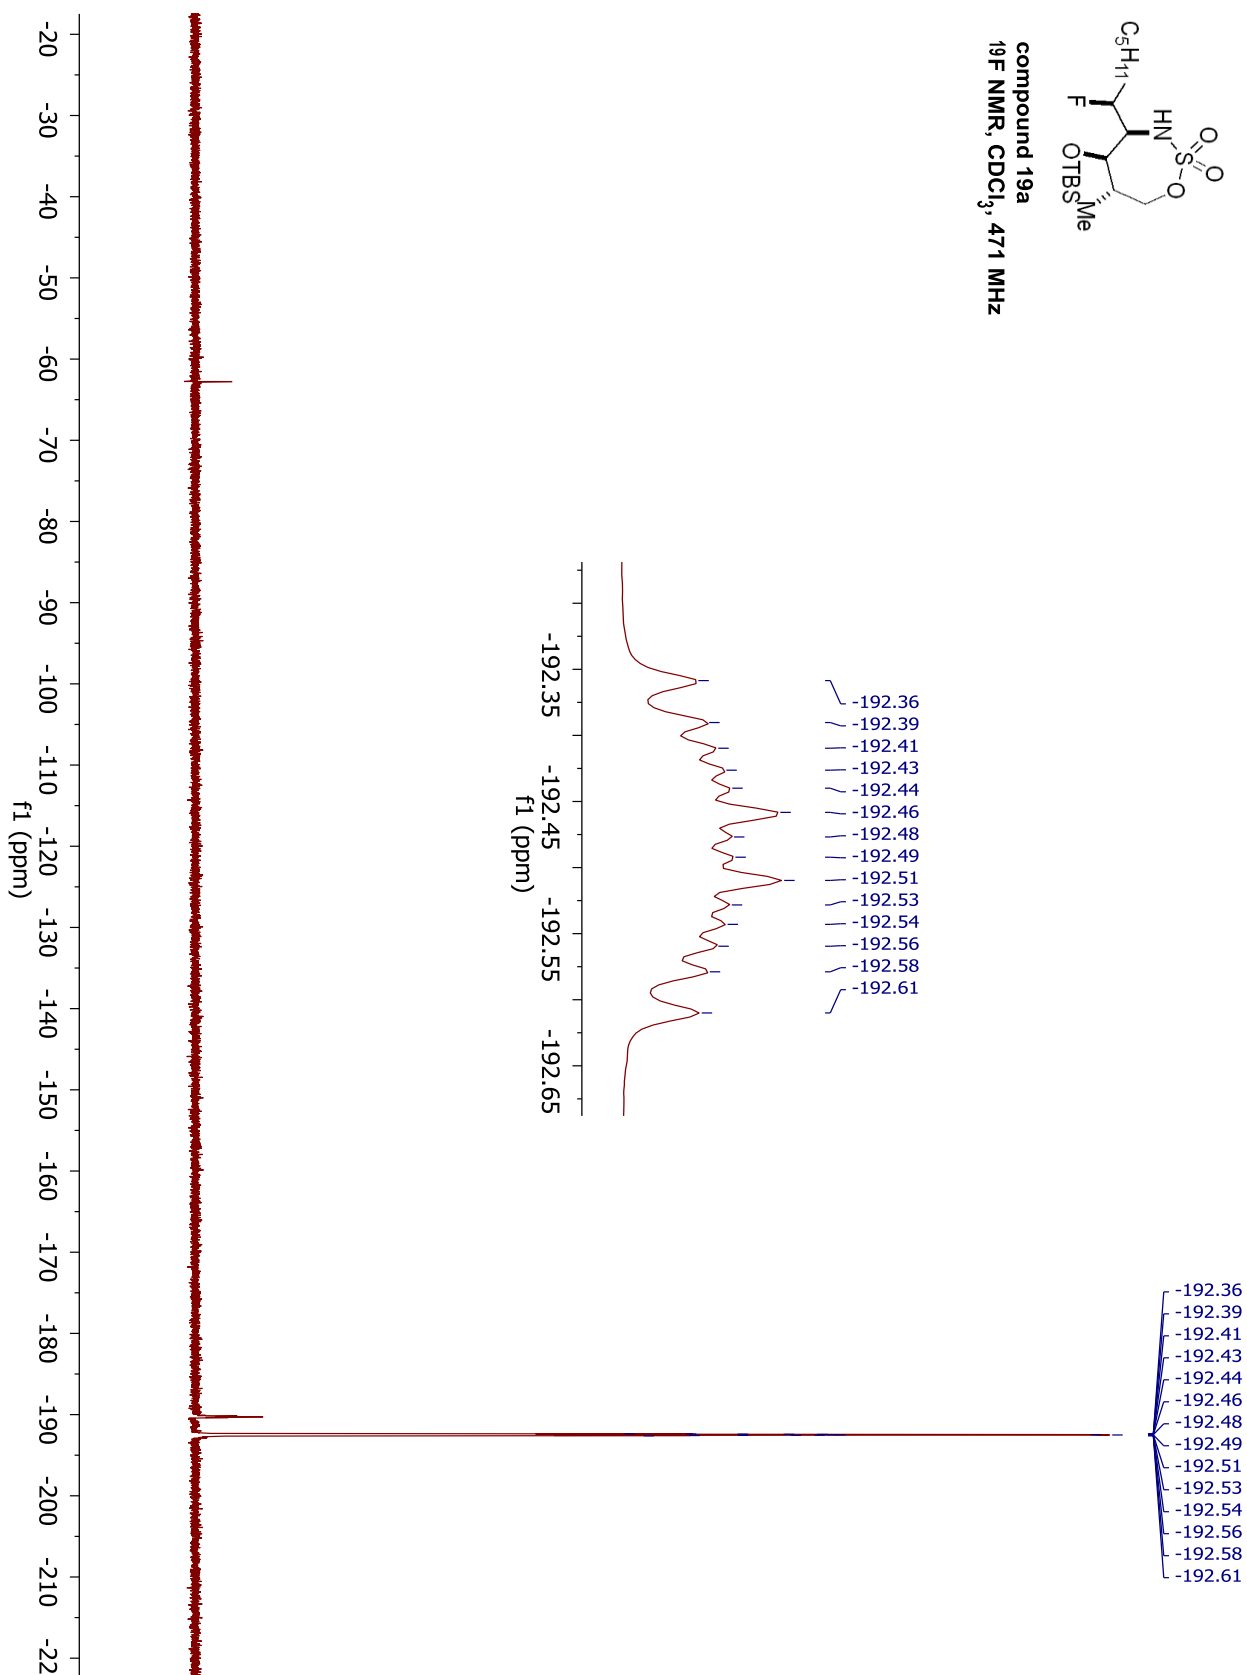

# <sup>1</sup>H NMR for compound 20a.

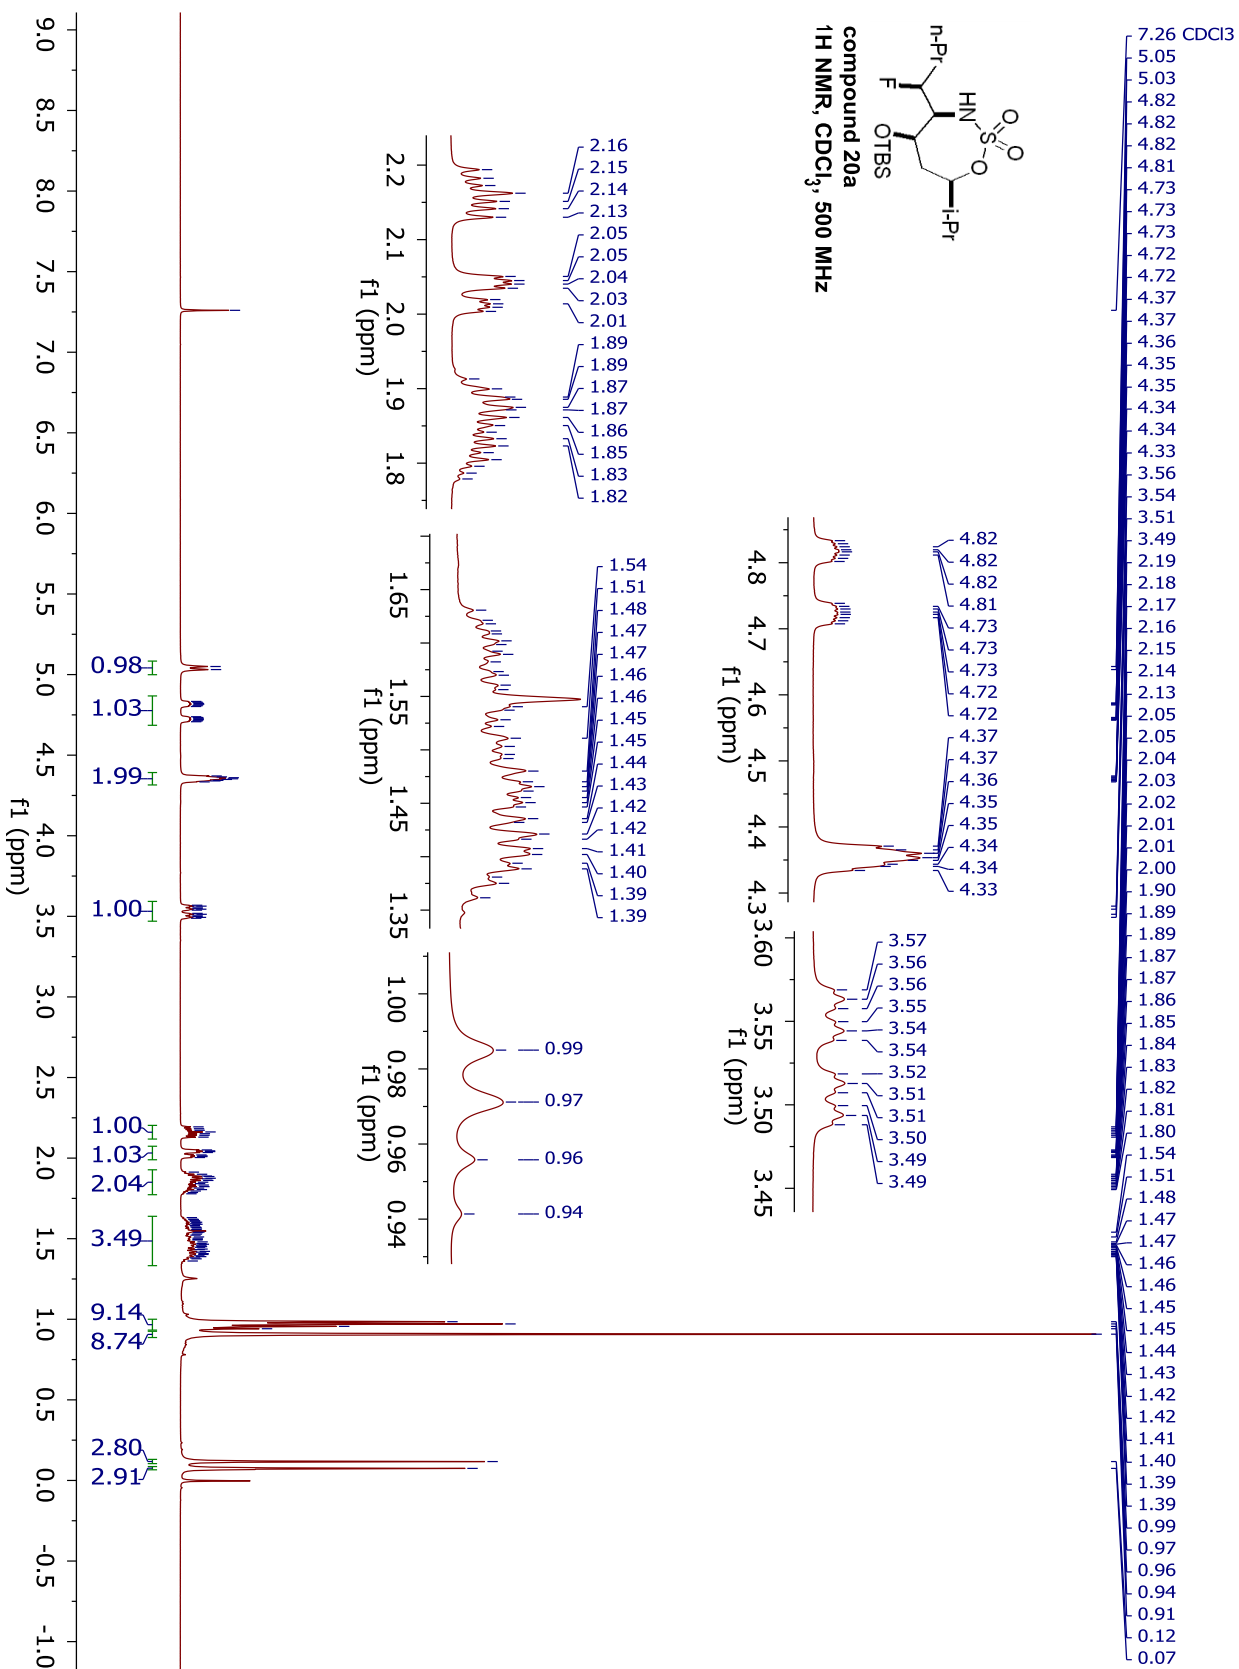

<sup>13</sup>C NMR for compound 20a.

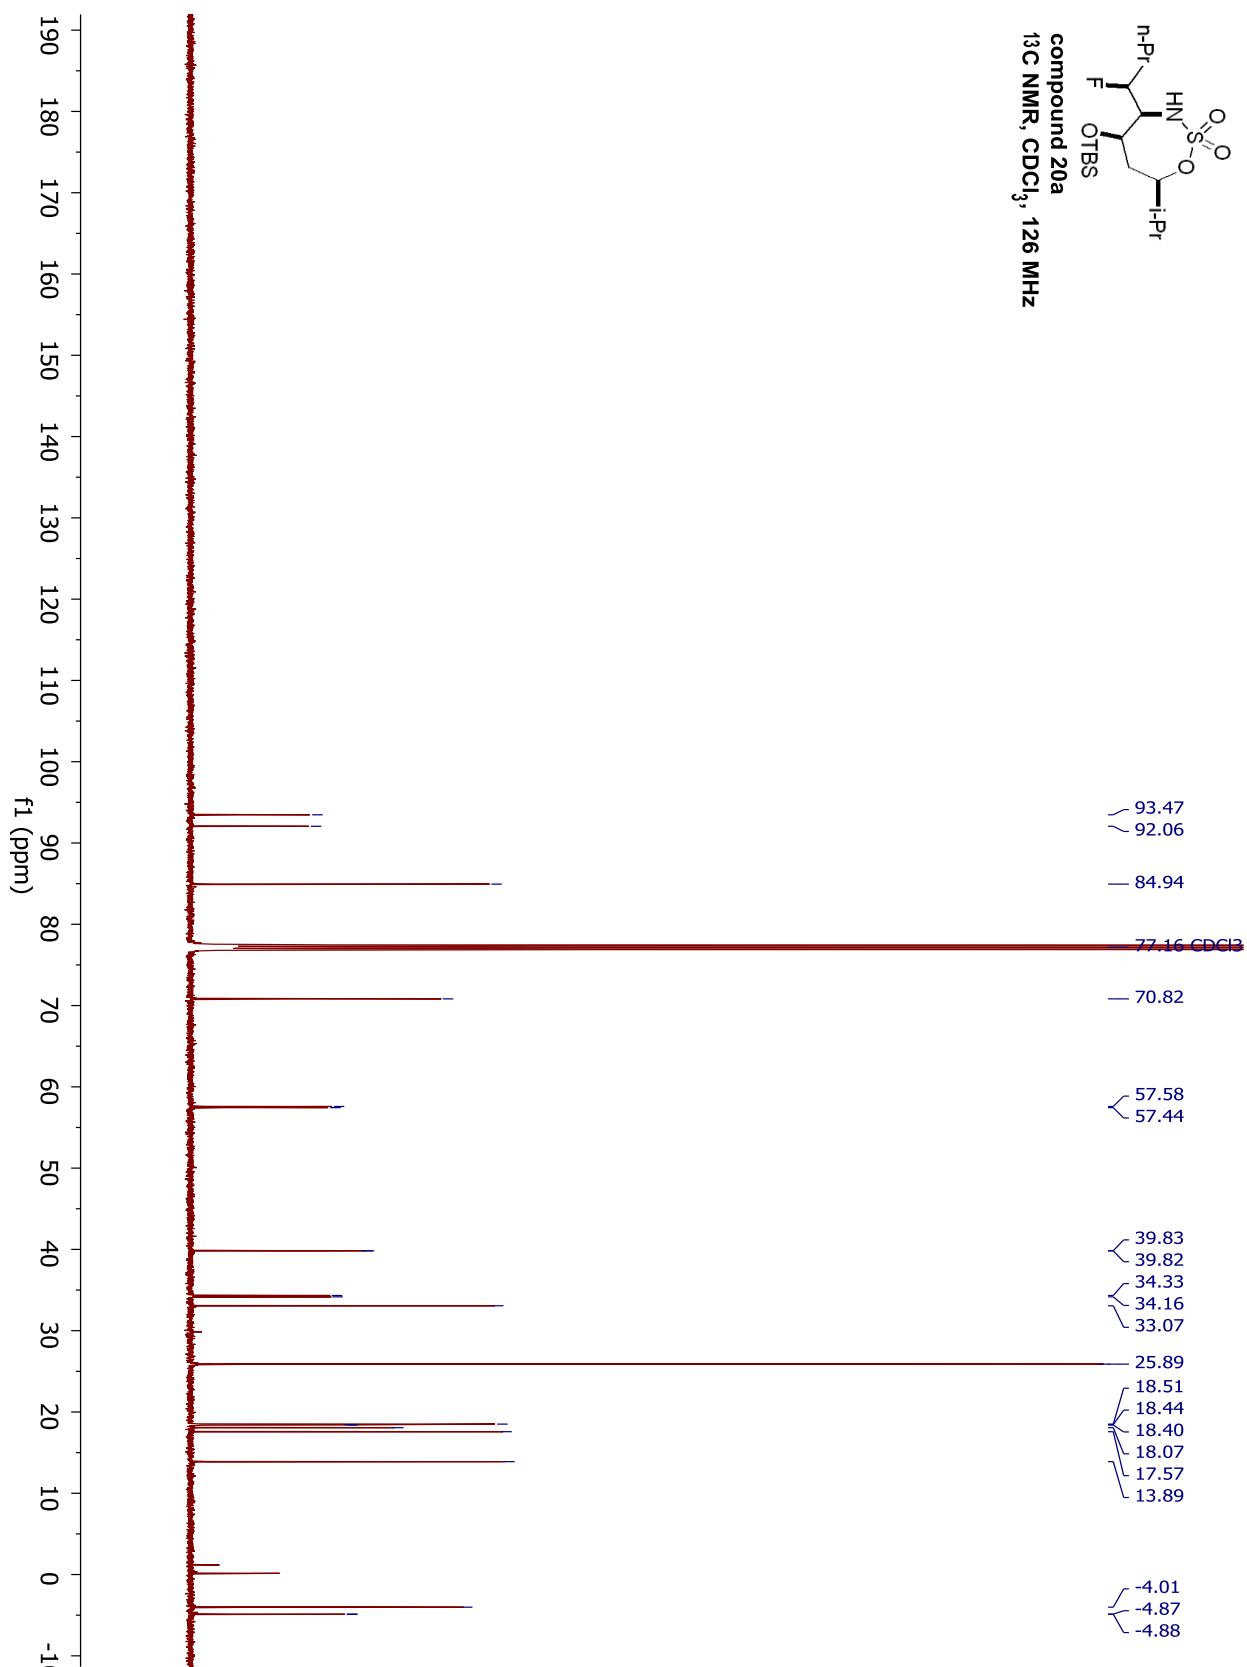

**<sup>19</sup>F NMR for compound 20a.**

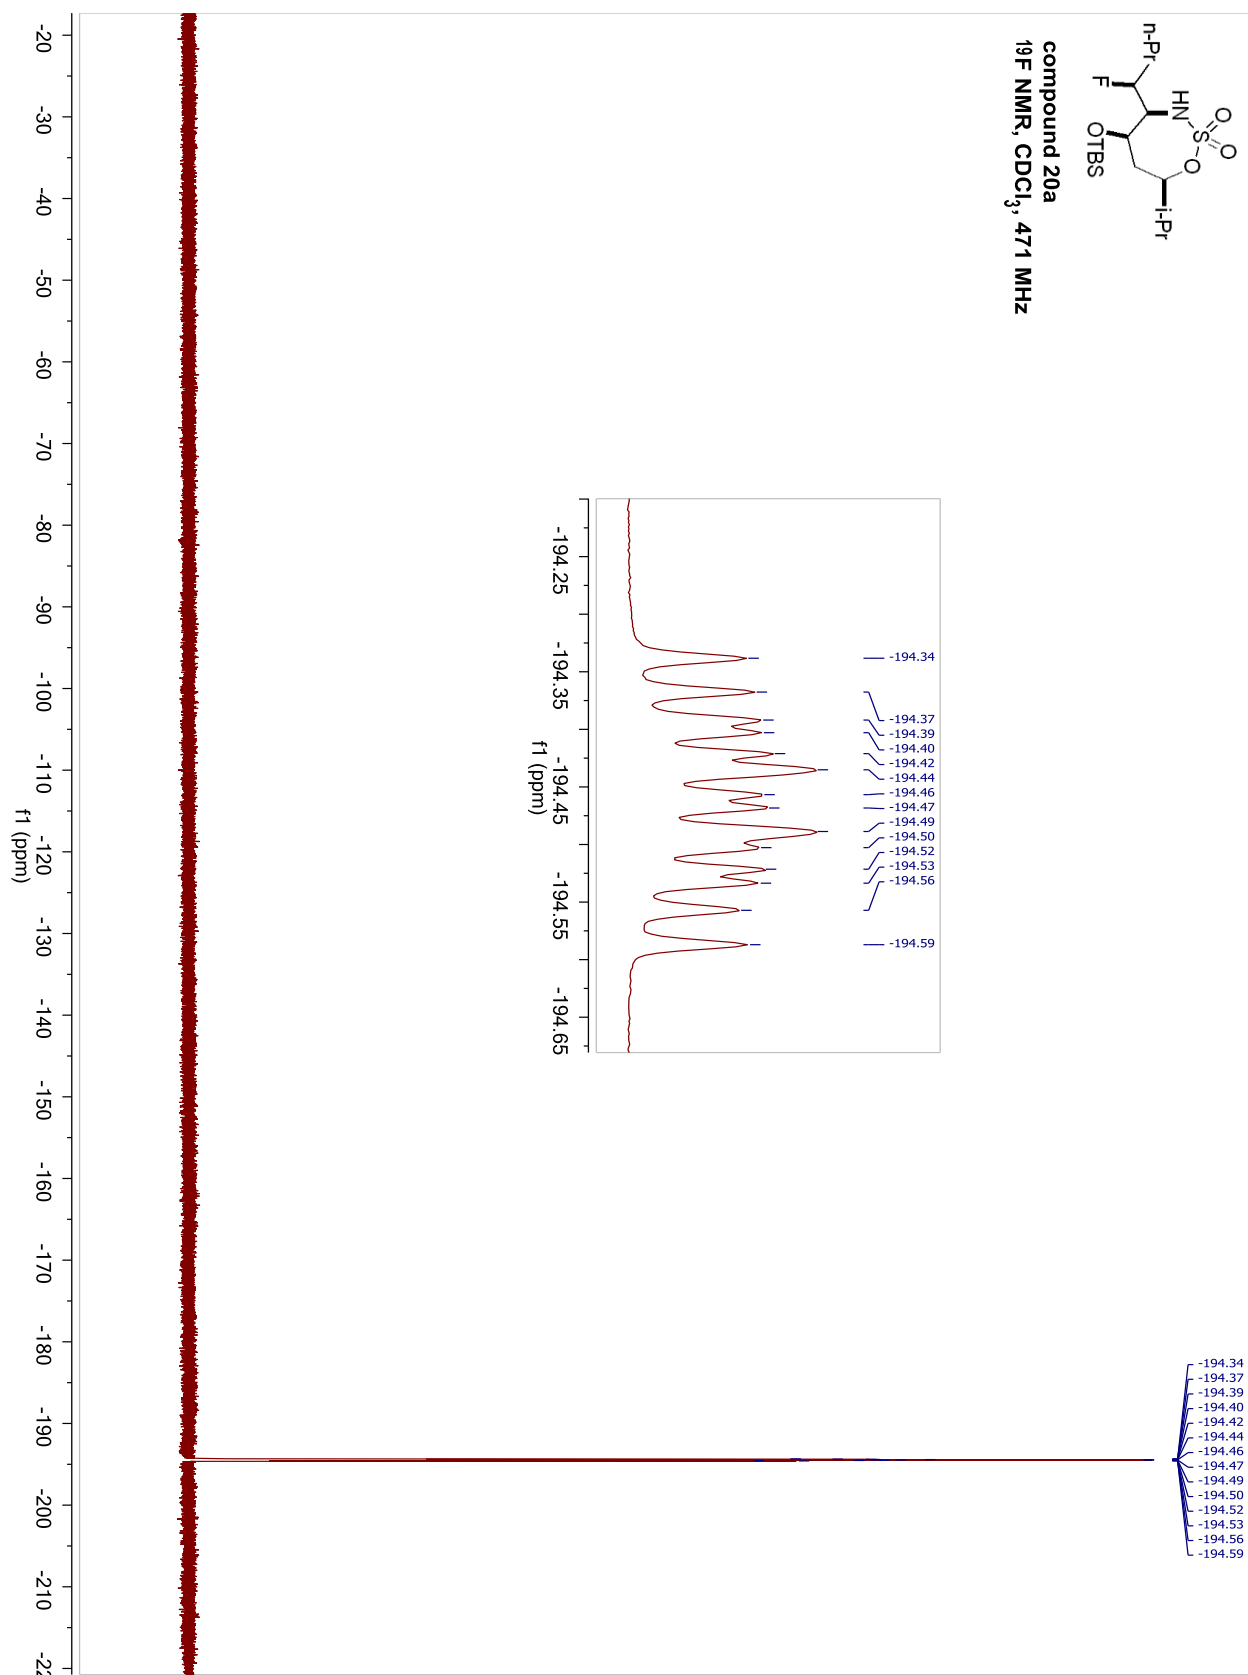

**<sup>1</sup>H NMR for intermediate for the synthesis of compound 28.**

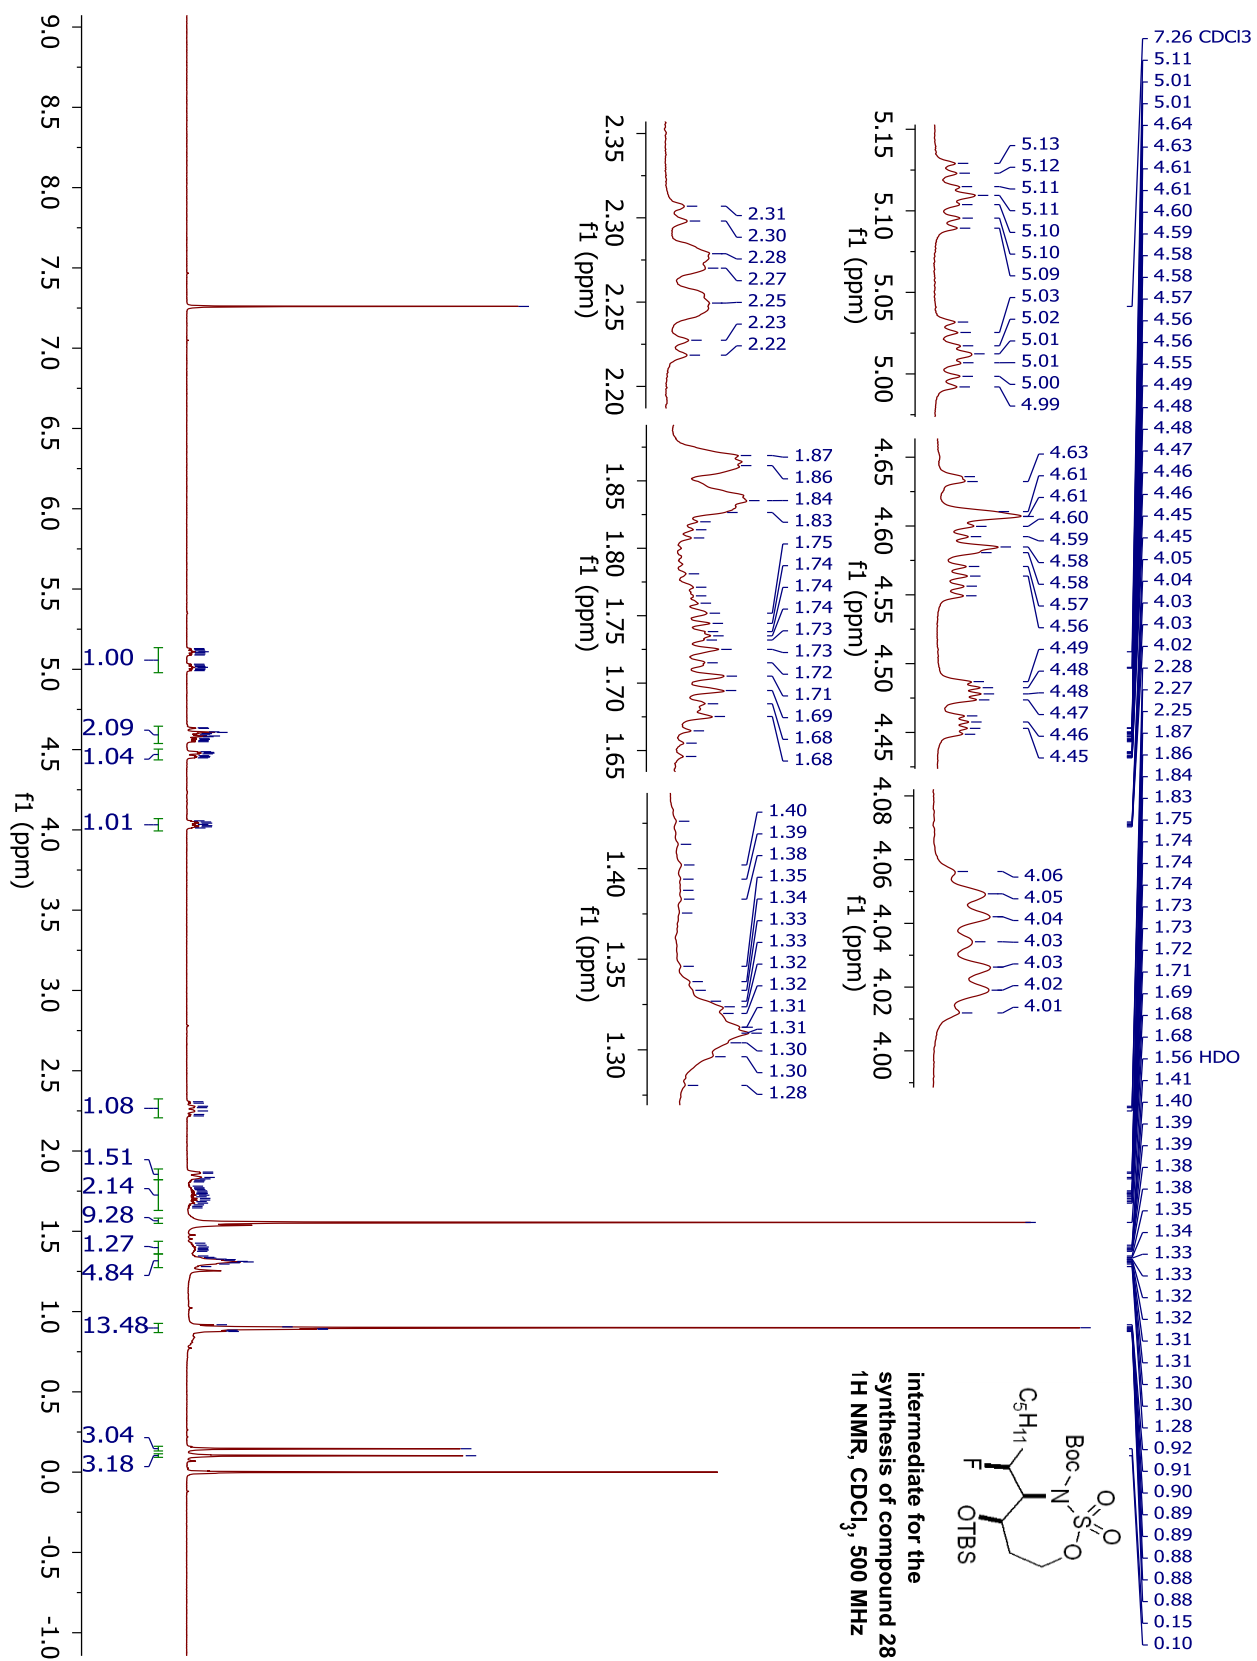

<sup>13</sup>C NMR for intermediate for the synthesis of compound 28.

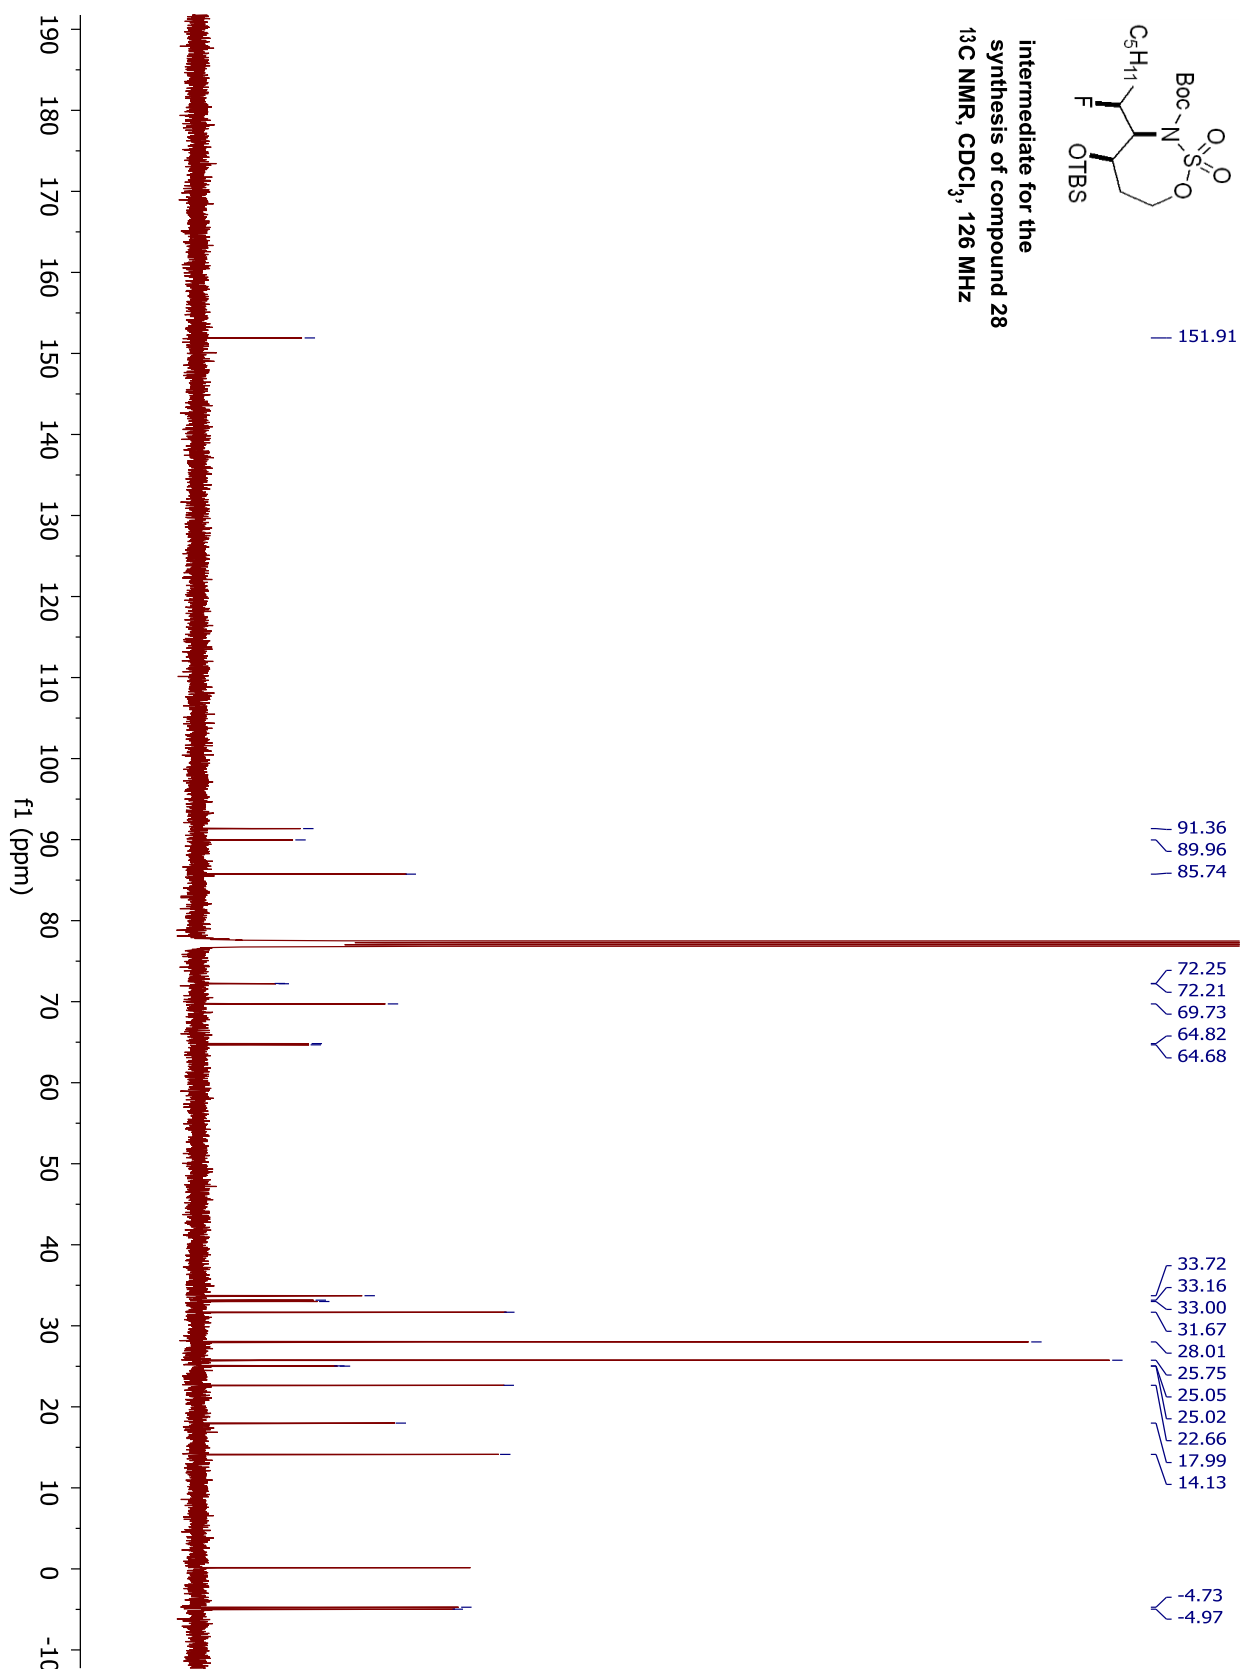



**<sup>19</sup>F NMR for intermediate for the synthesis of compound 28.**

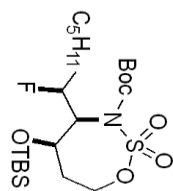

Intermediate for the synthesis of compound 28  
<sup>19</sup>F NMR, CDCl<sub>3</sub>, 471 MHz

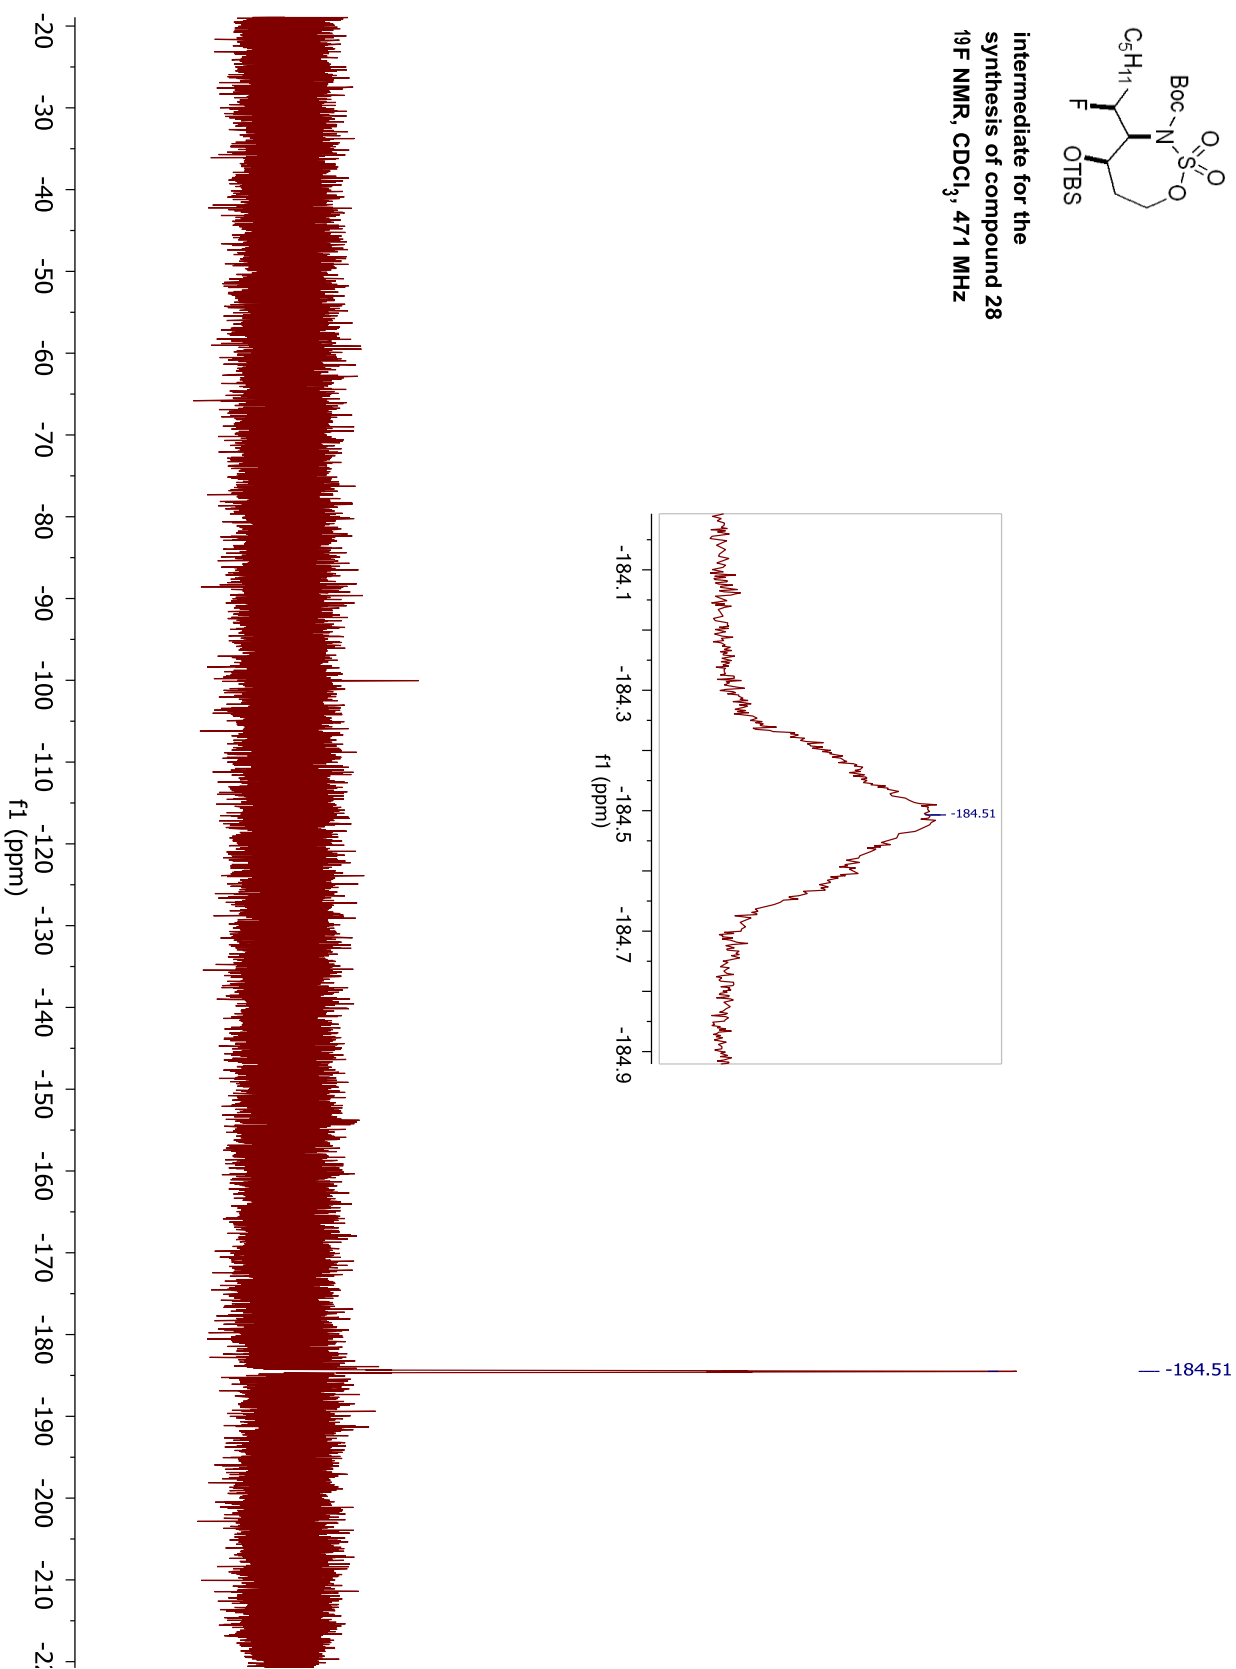

<sup>1</sup>H NMR for compound 28.

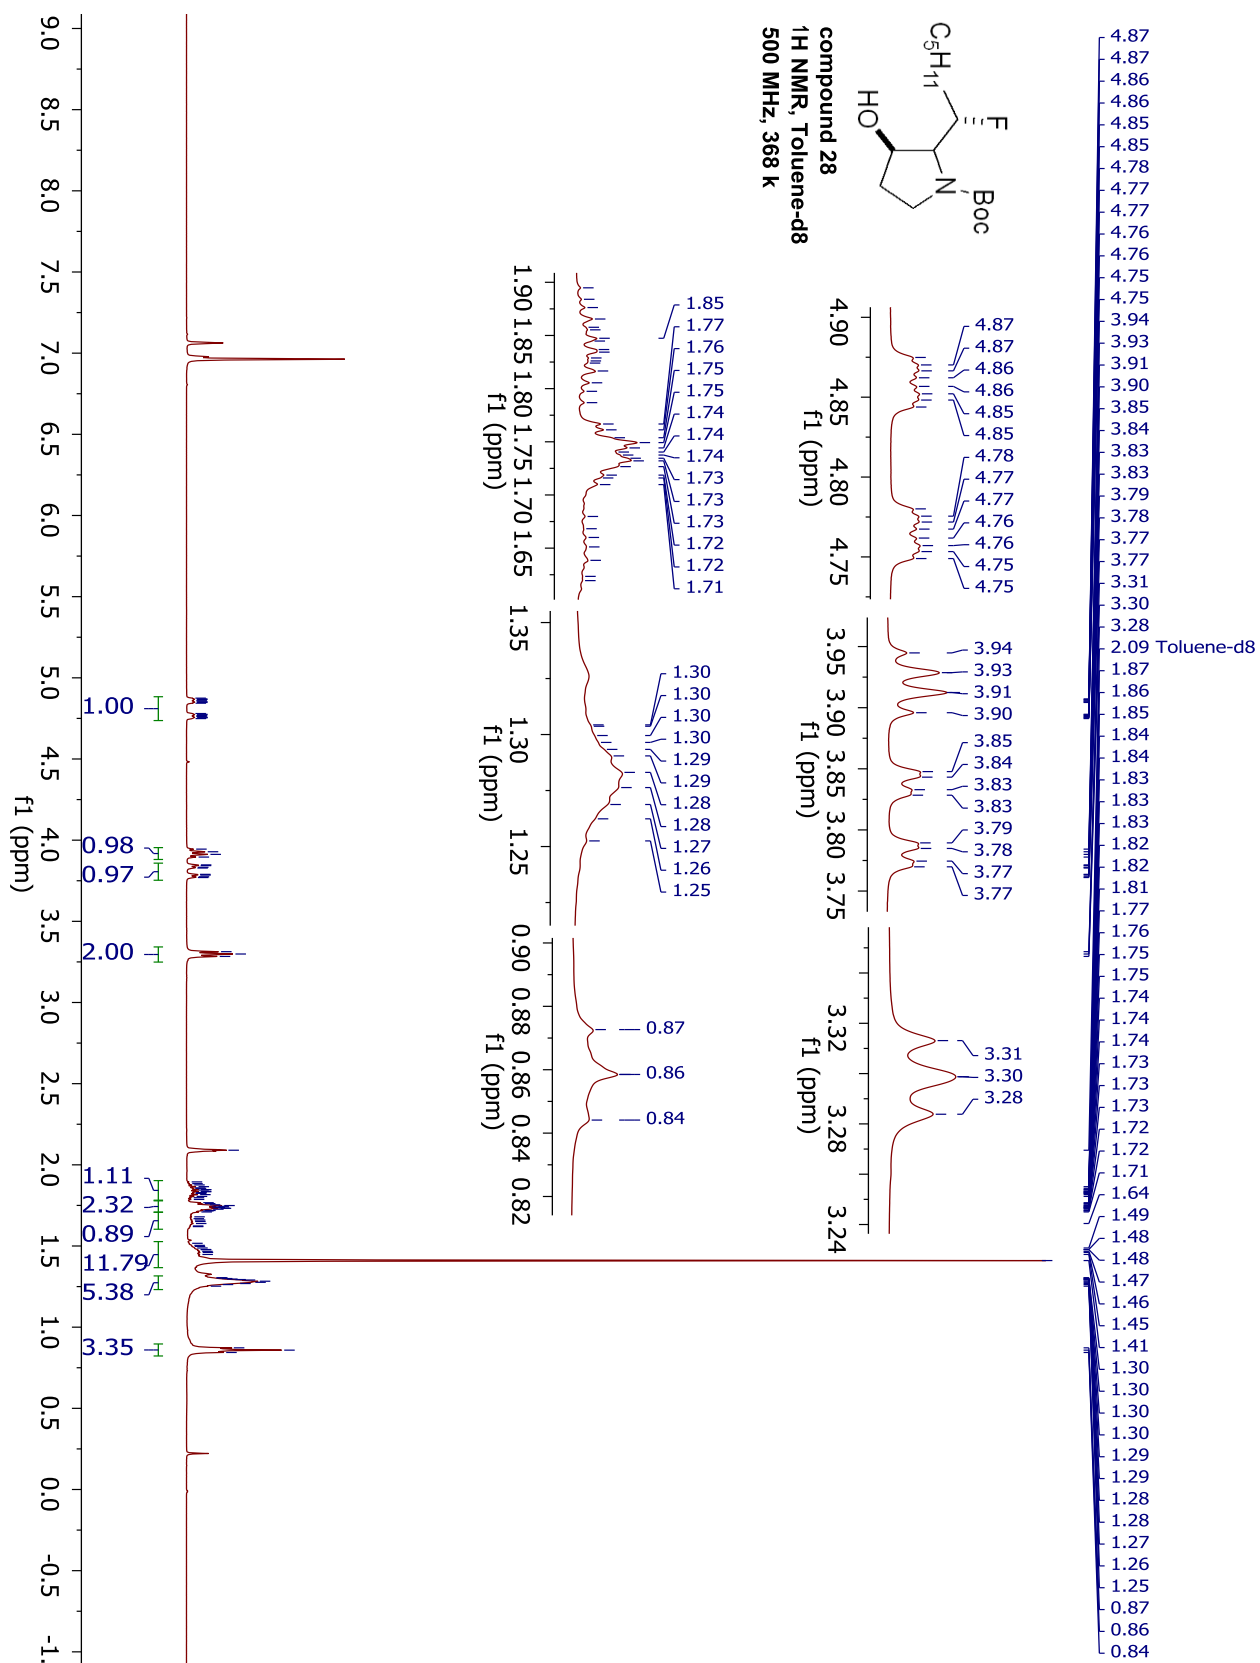

<sup>13</sup>C NMR for compound 28.

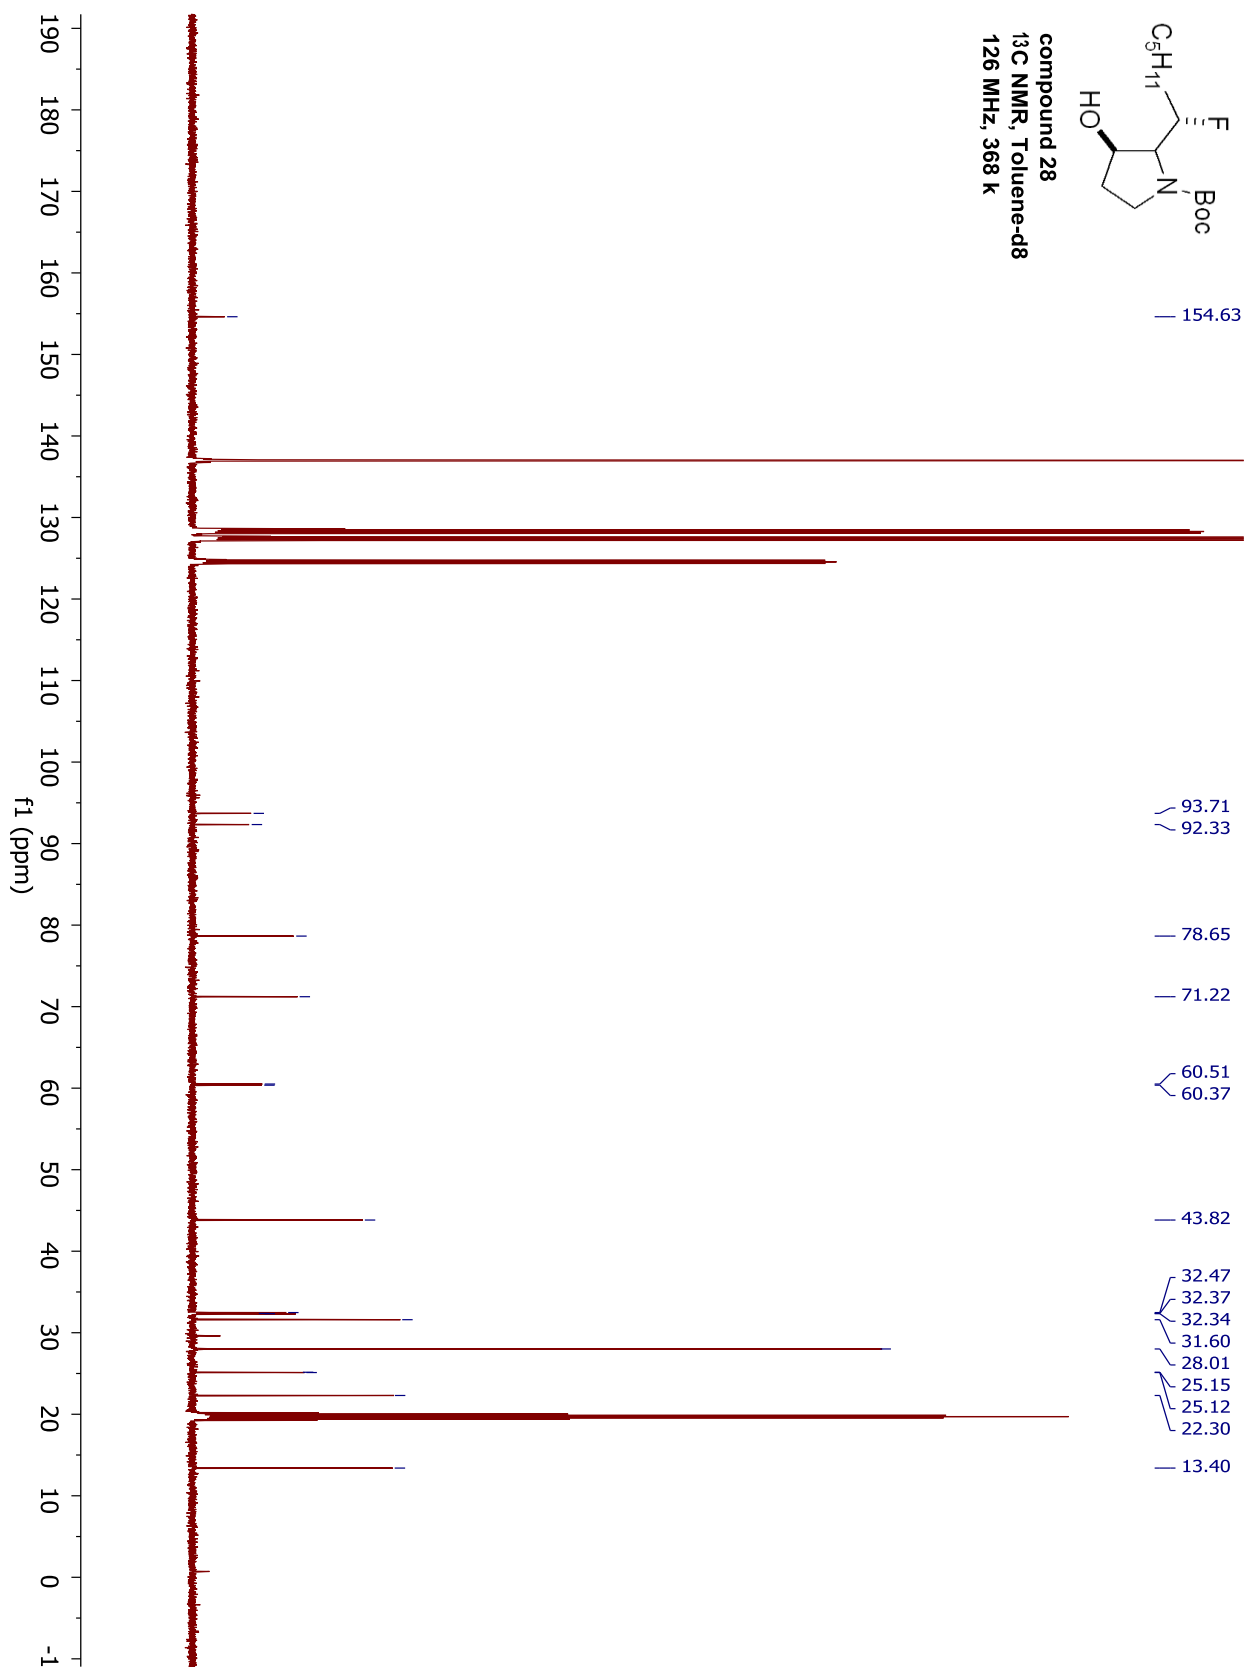

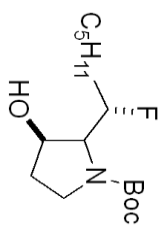

compound 28  
19F NMR, Toluene-d8  
471 MHz, 368 K

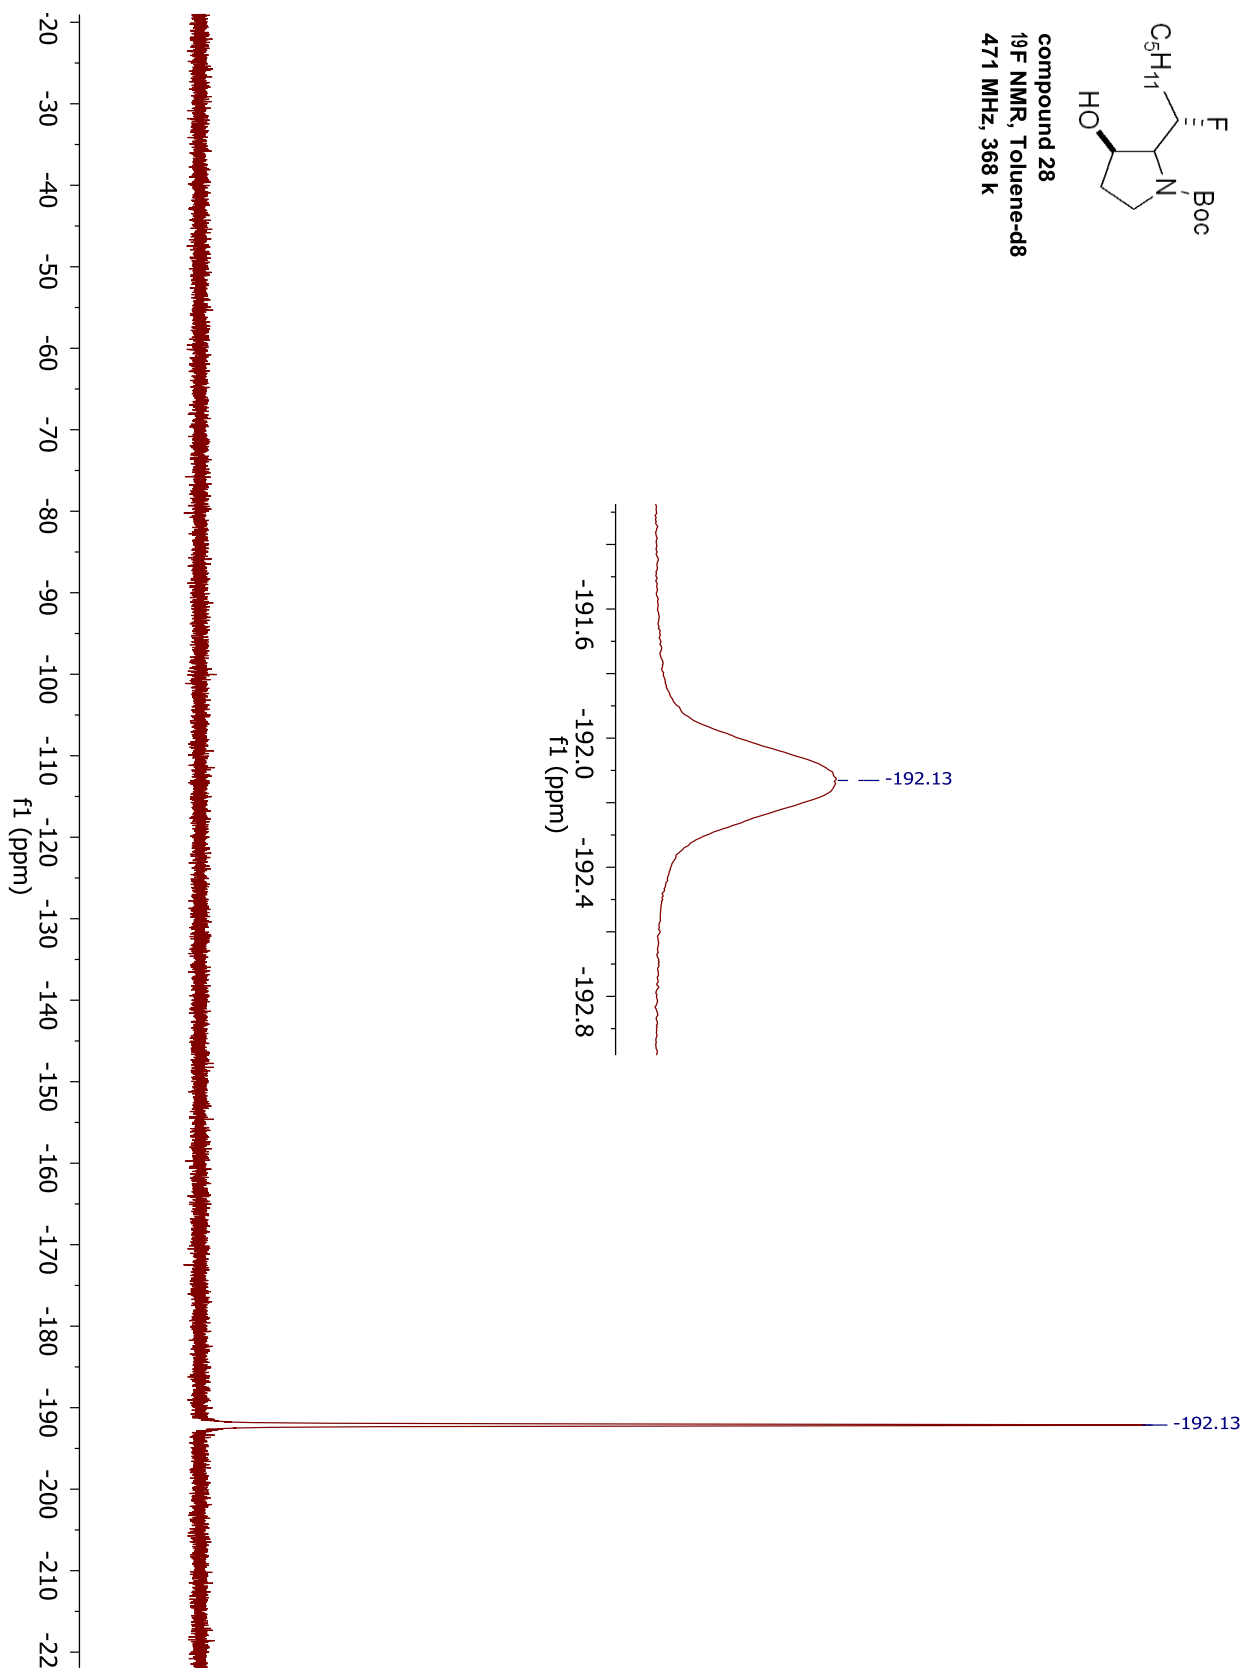

$^{19}\text{F}$  NMR for compound 28.

<sup>1</sup>H NMR for intermediate for the synthesis of compound 29.

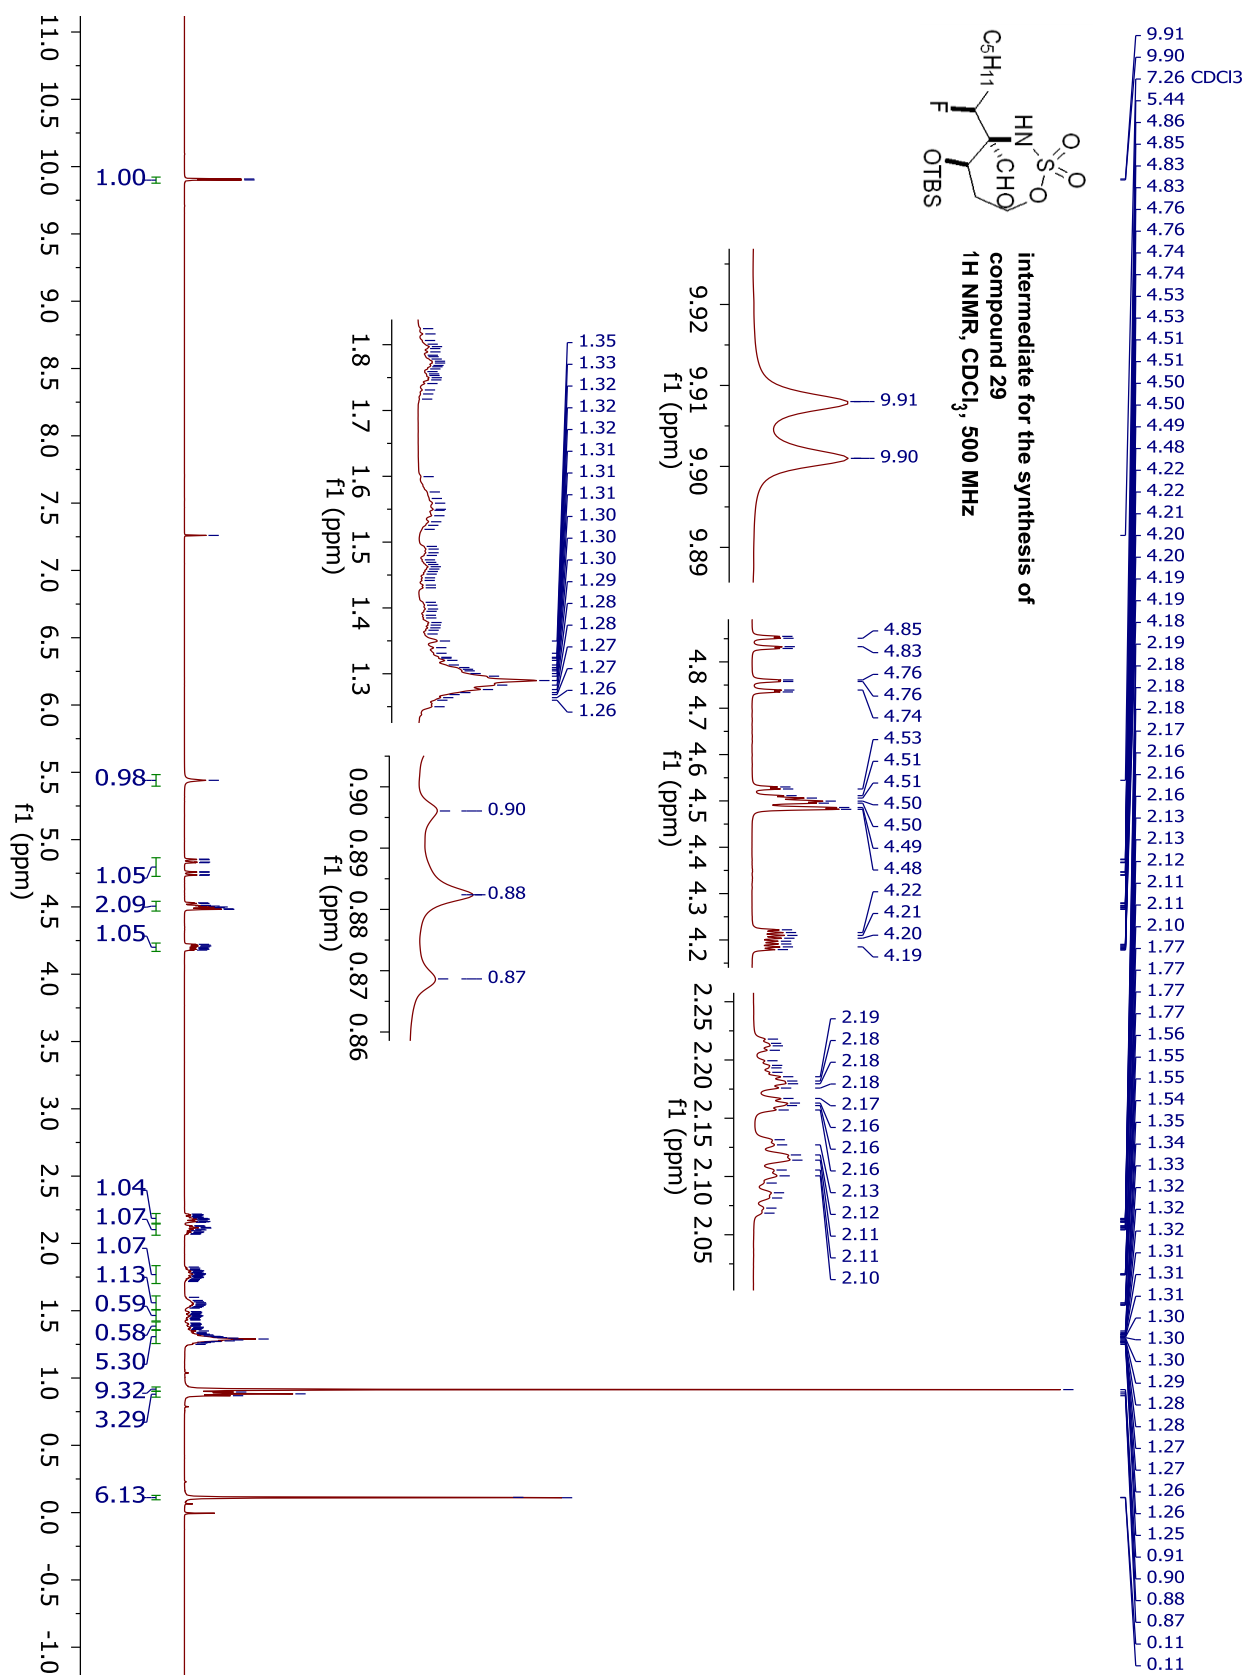

**$^{13}\text{C}$  NMR for intermediate for the synthesis of compound 29.**

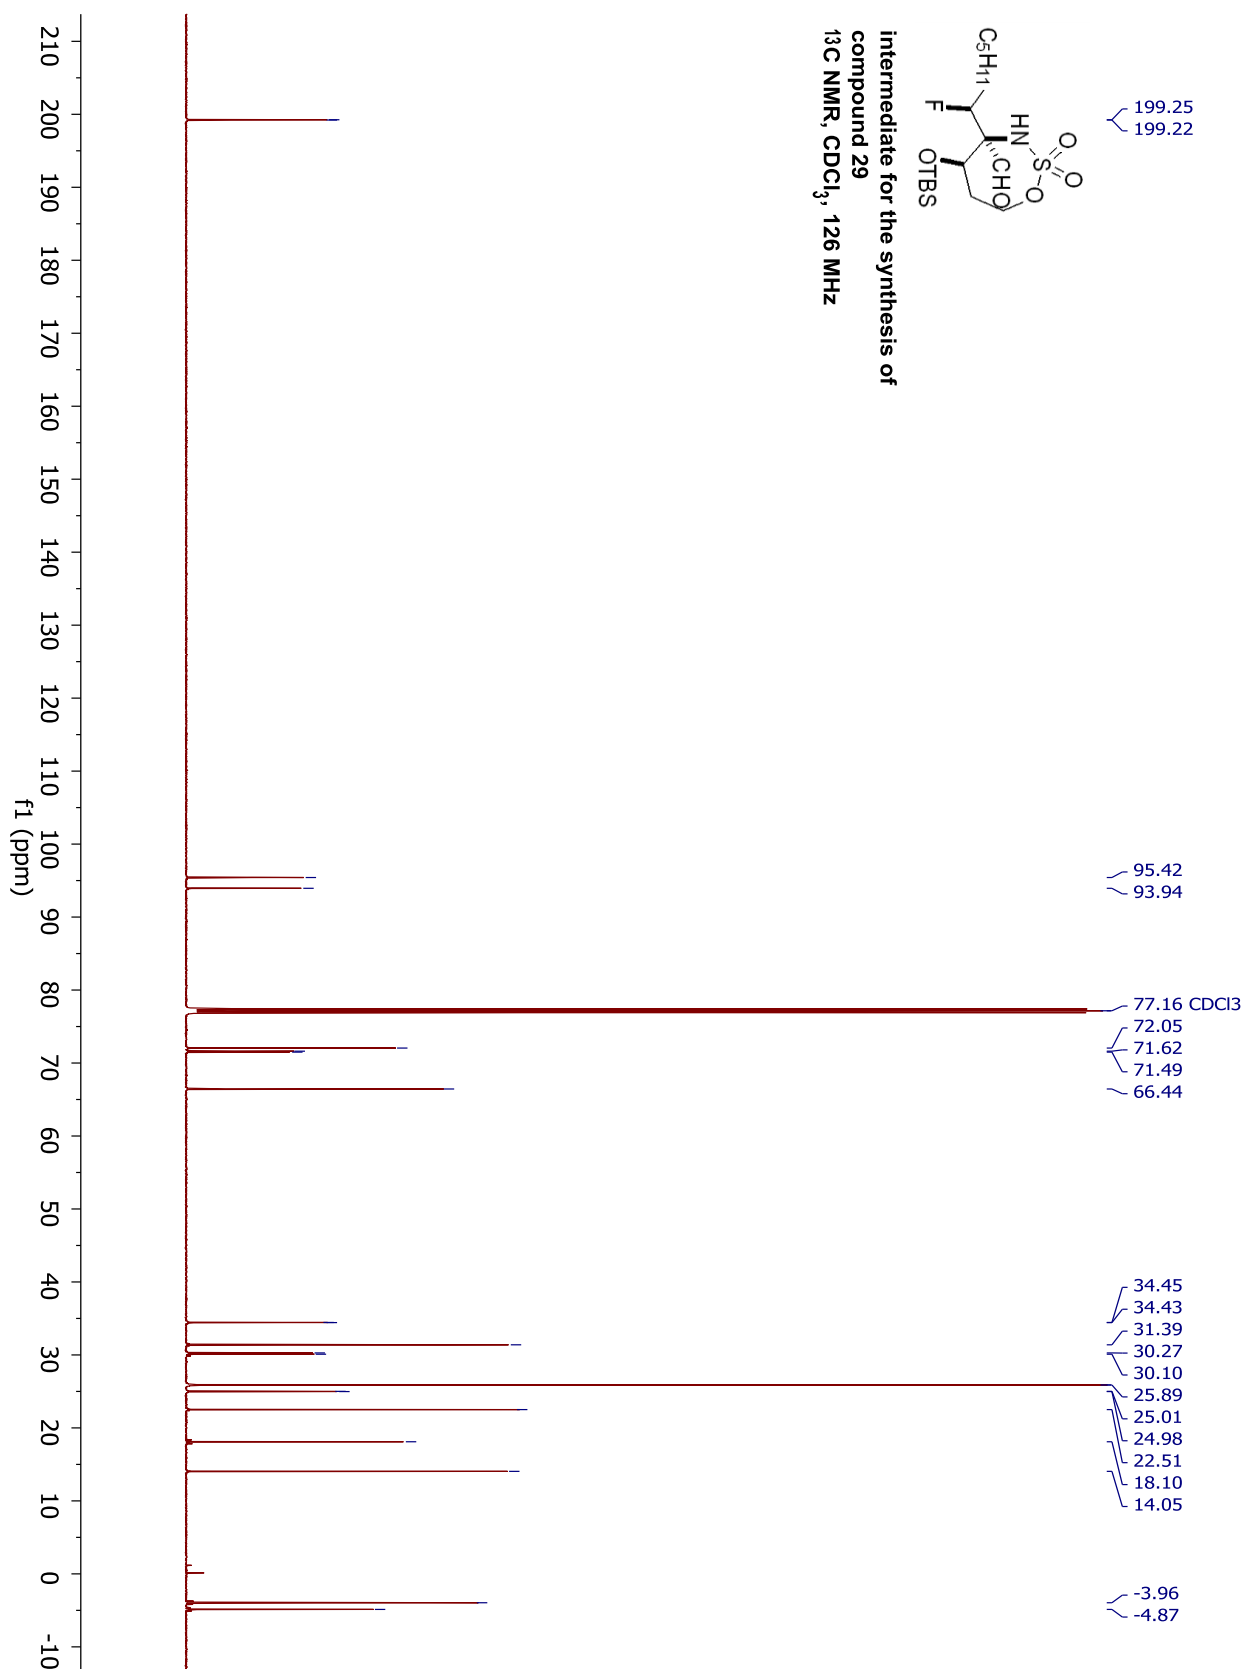

**$^{19}\text{F}$  NMR for intermediate for the synthesis of compound 29.**

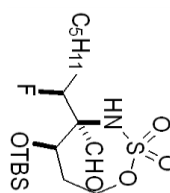

Intermediate for the synthesis of  
compound 29  
 $^{19}\text{F}$  NMR,  $\text{CDCl}_3$ , 471 MHz

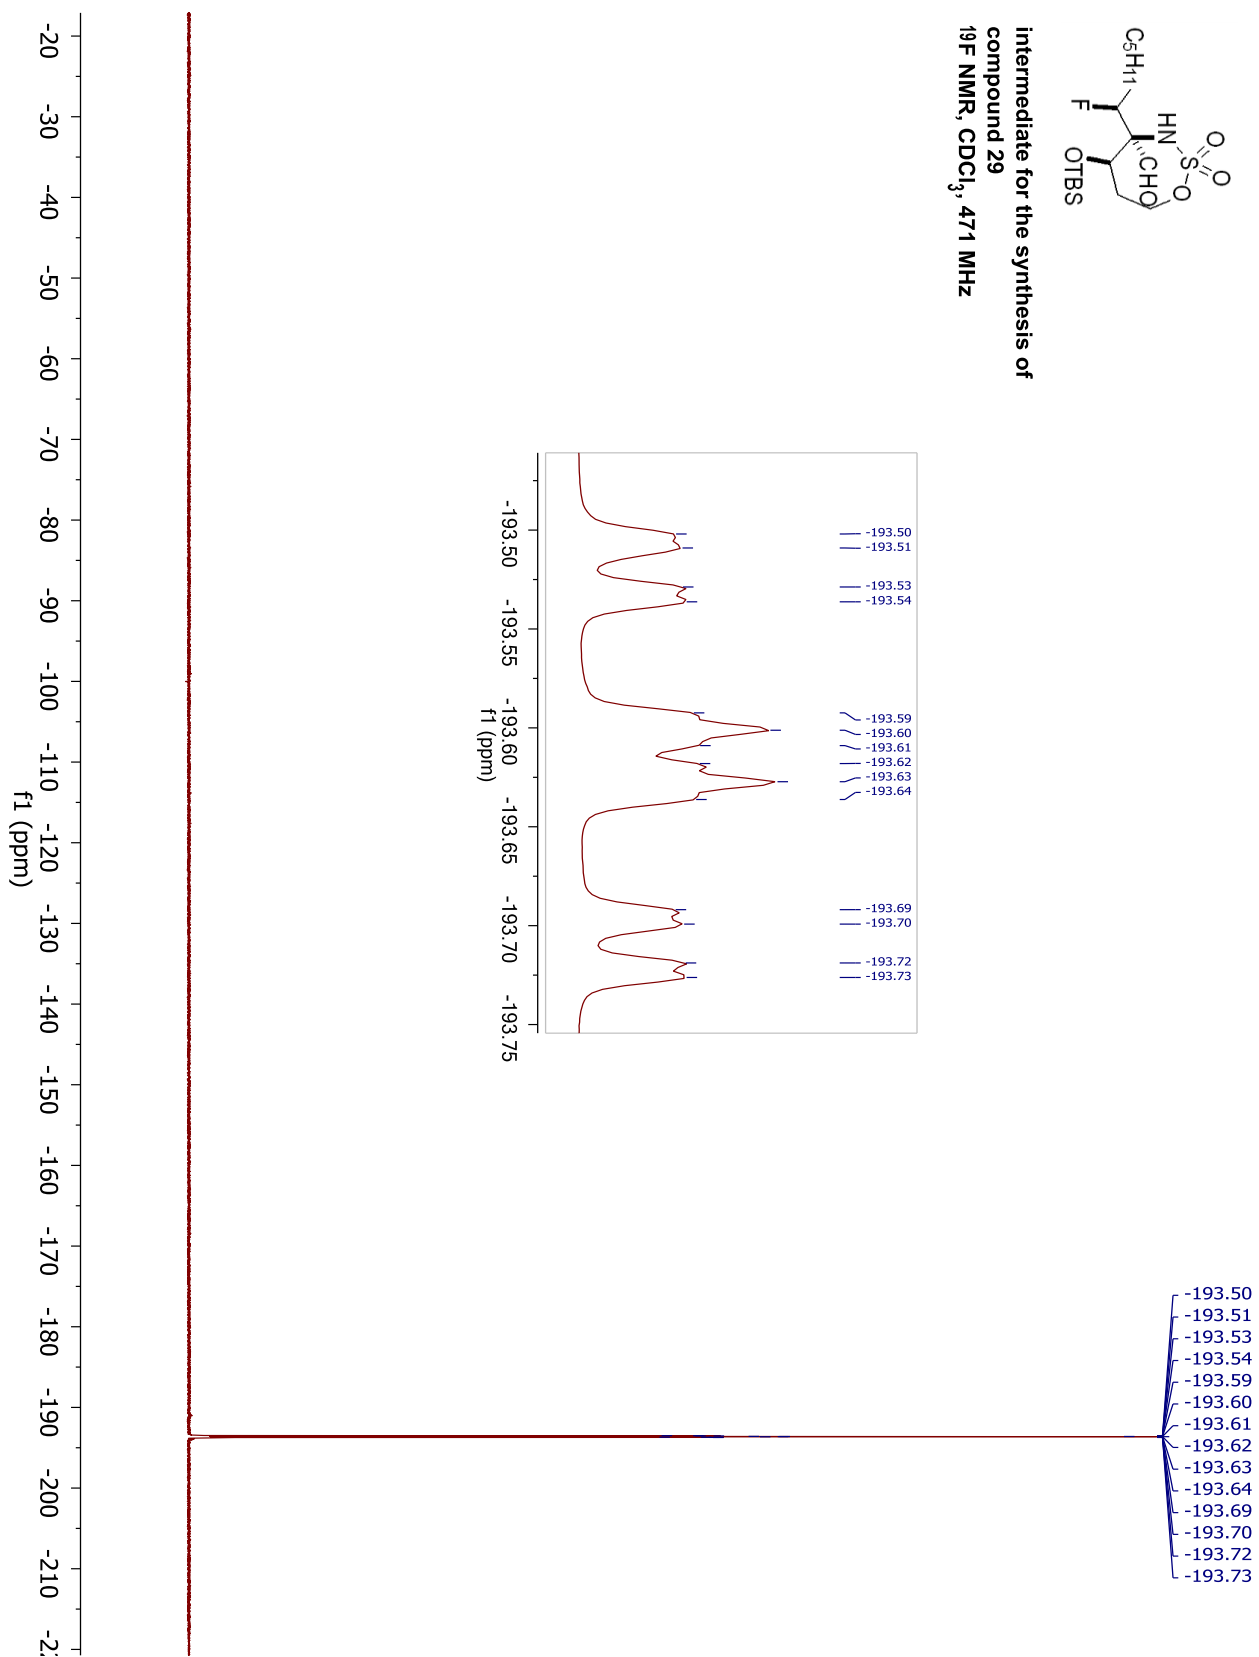





<sup>13</sup>C NMR for compound 29.

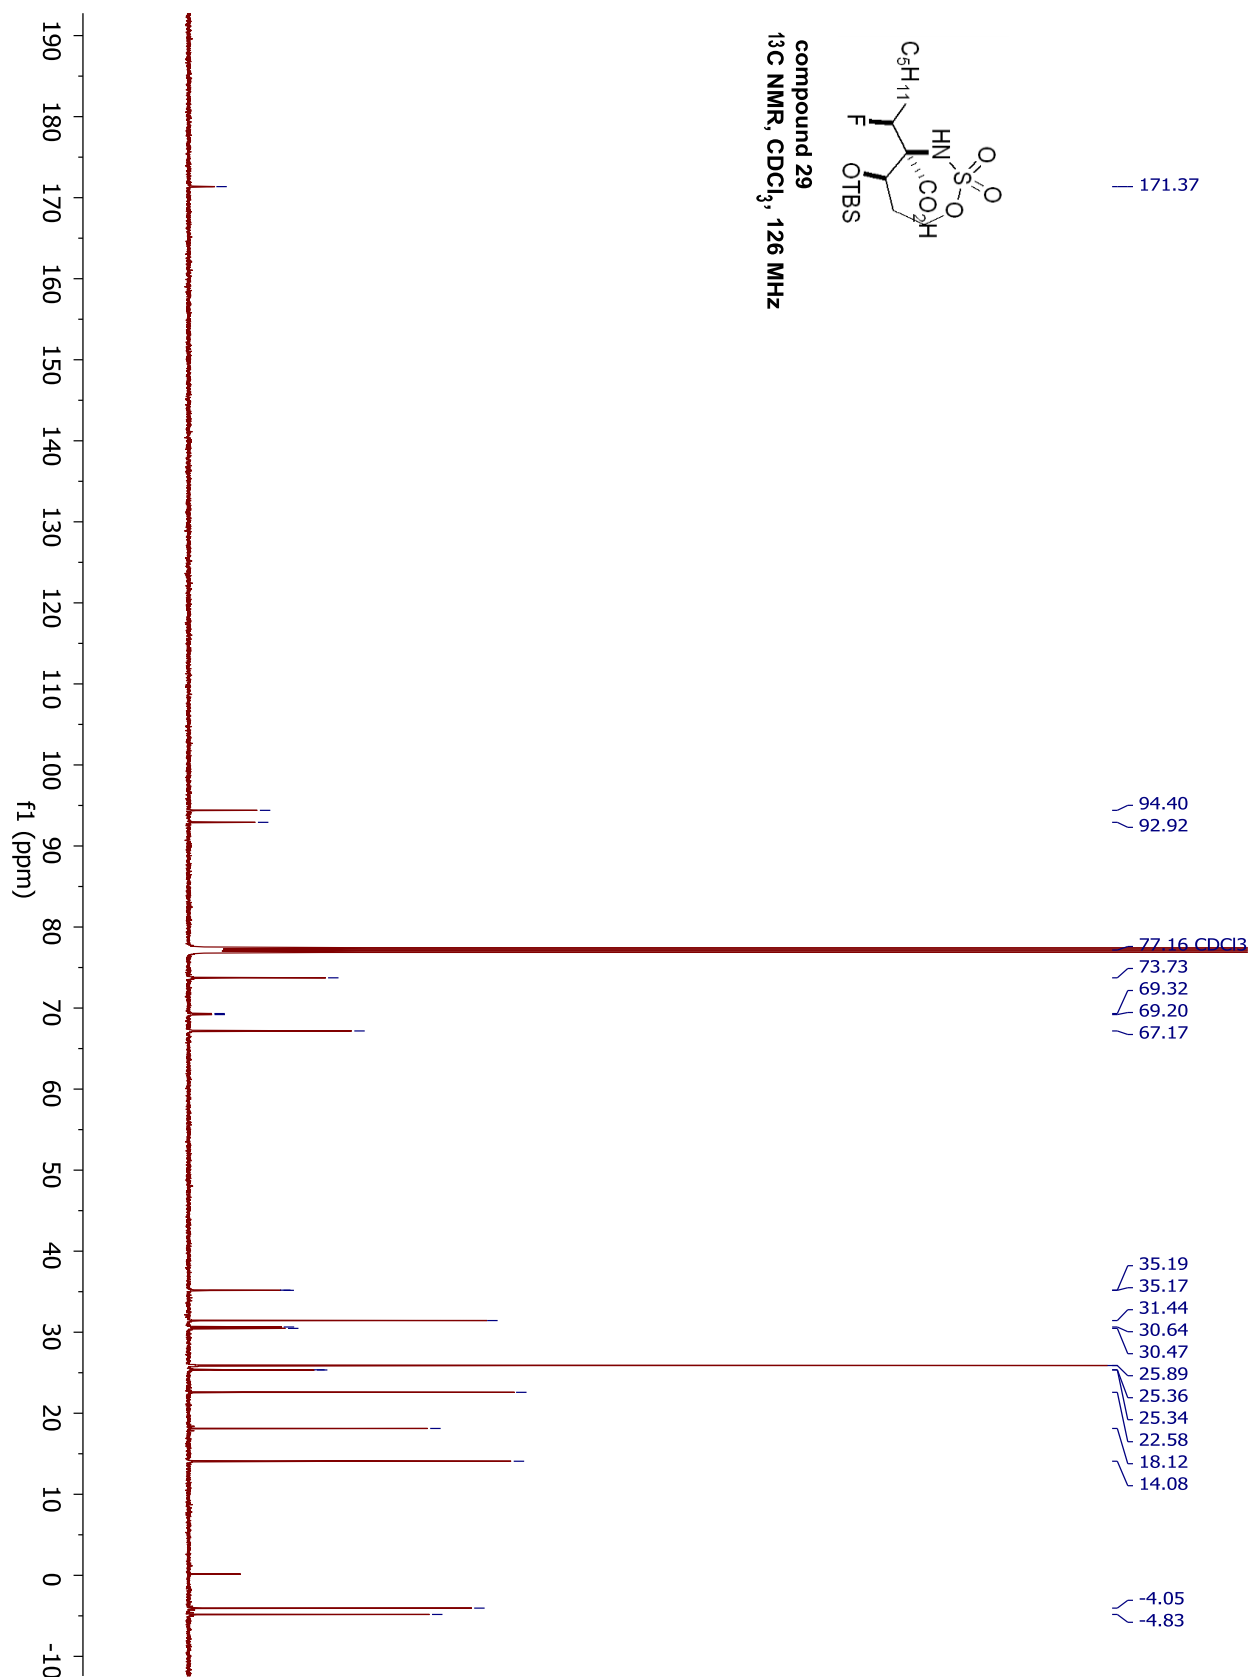

**$^{19}\text{F}$  NMR for compound 29.**

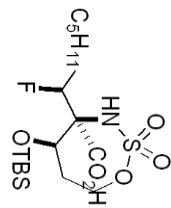

compound 29  
 $^{19}\text{F}$  NMR,  $\text{CDCl}_3$ , 471 MHz

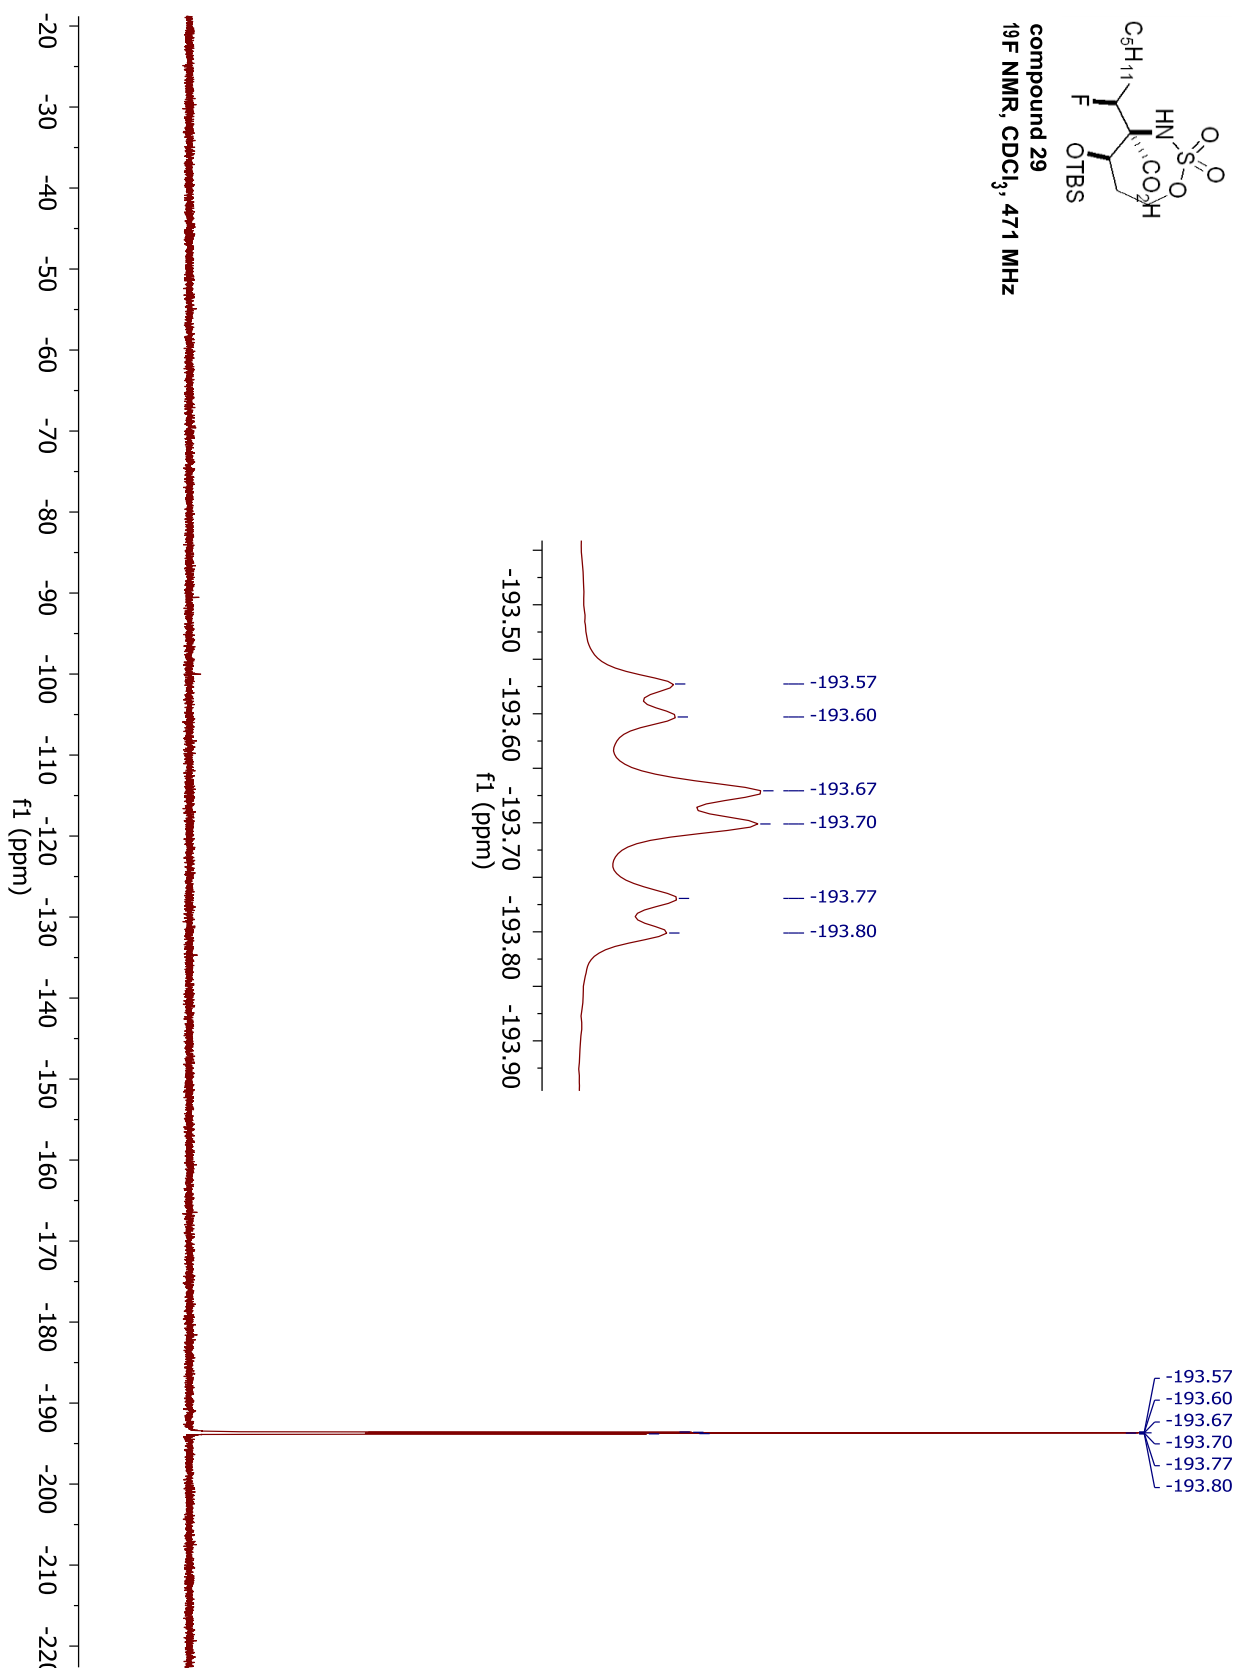

**<sup>1</sup>H NMR for intermediate for synthesis of compound 30.**

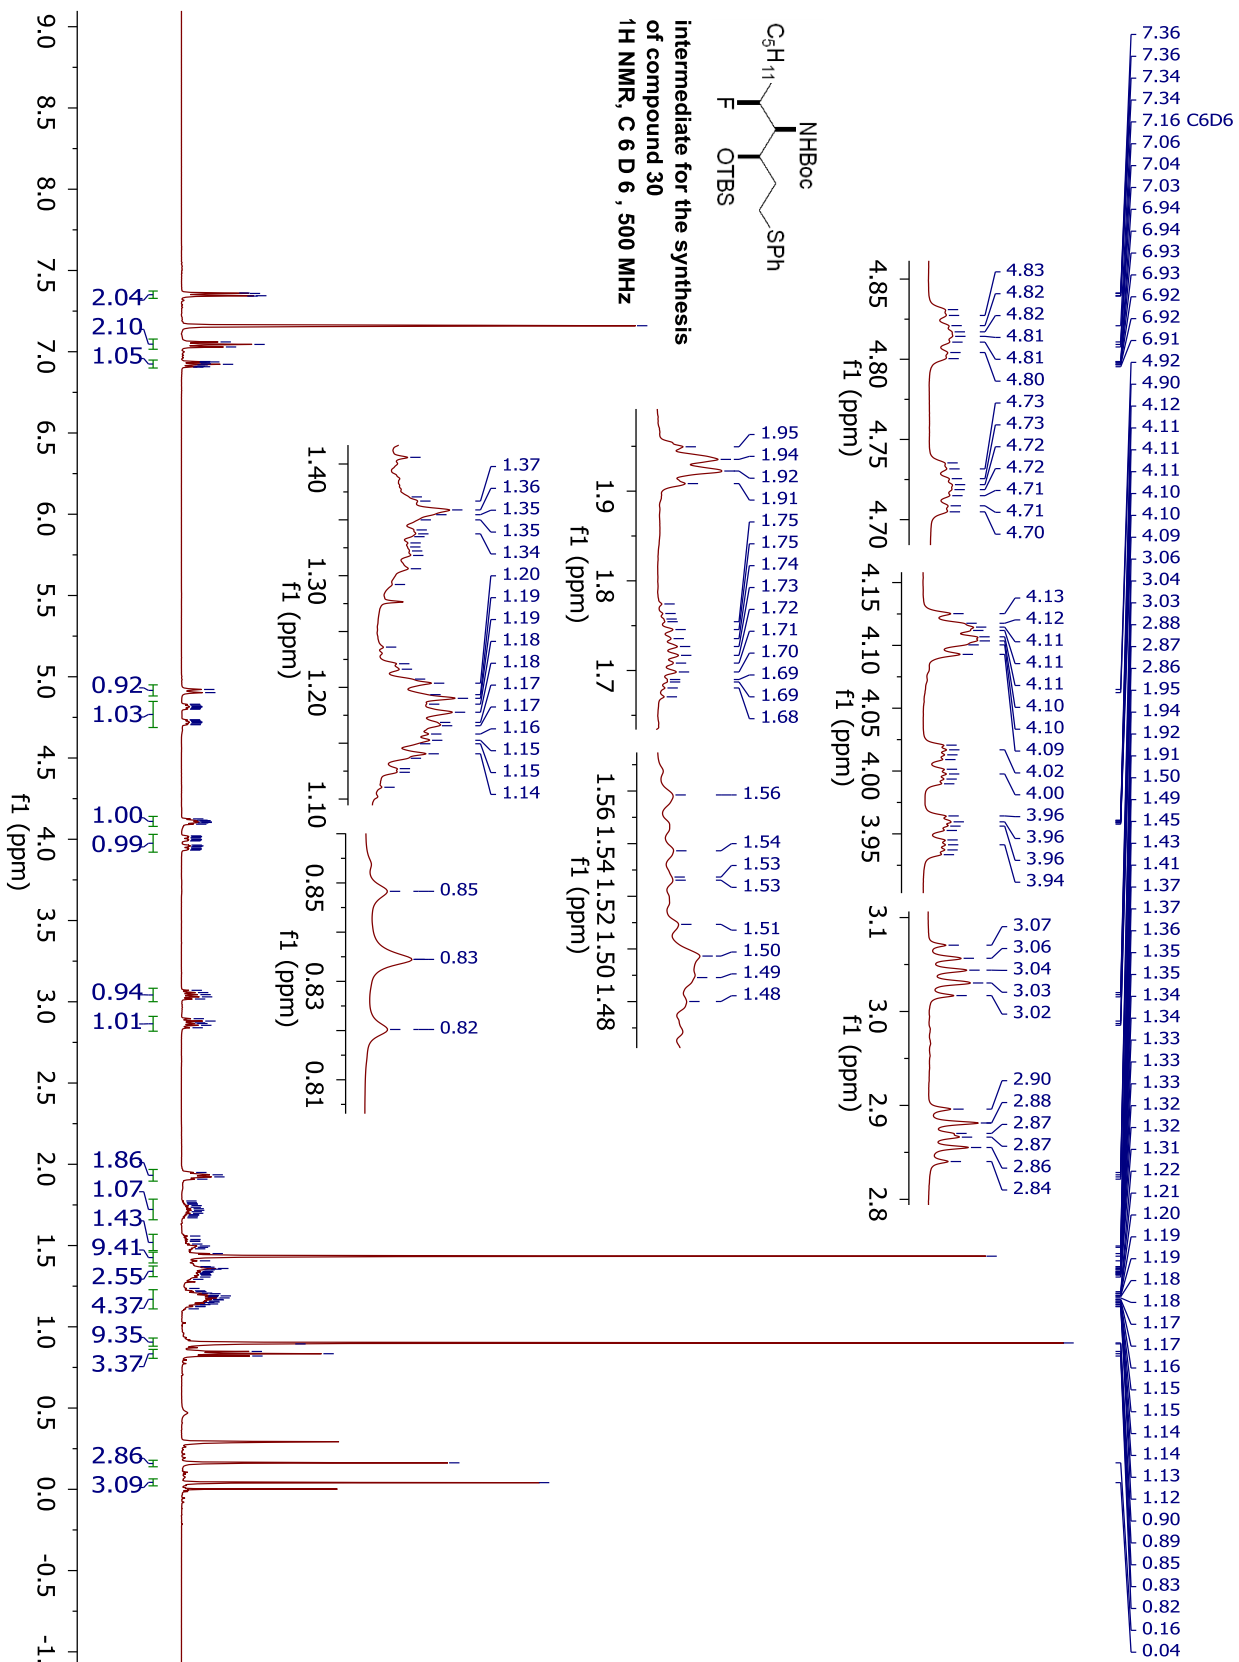

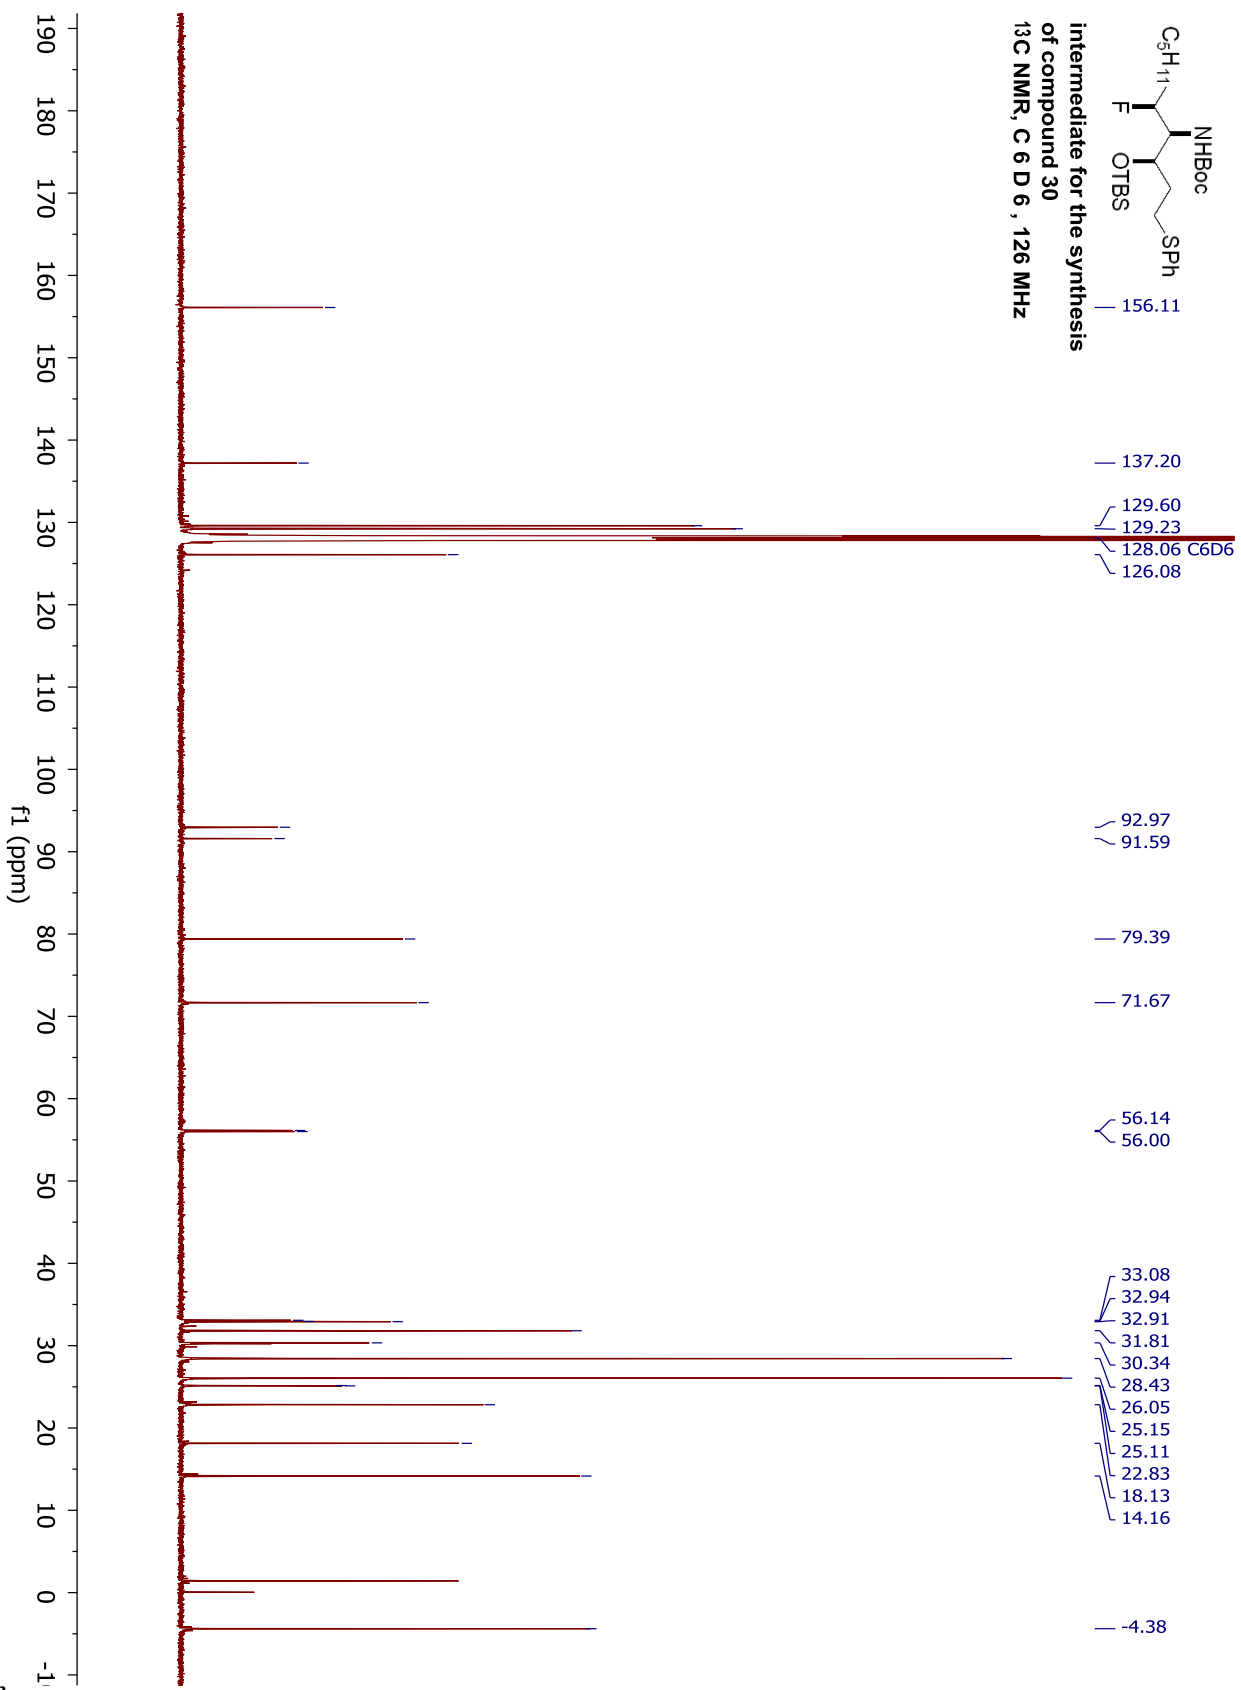

<sup>13</sup>C NMR for intermediate for synthesis of compound 30.

**$^{19}\text{F}$  NMR for intermediate for synthesis of compound 30.**

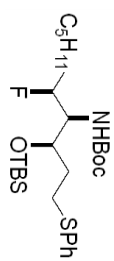

Intermediate for the synthesis  
of compound 30  
 $^{19}\text{F}$  NMR, C 6 D 6 , 471 MHz

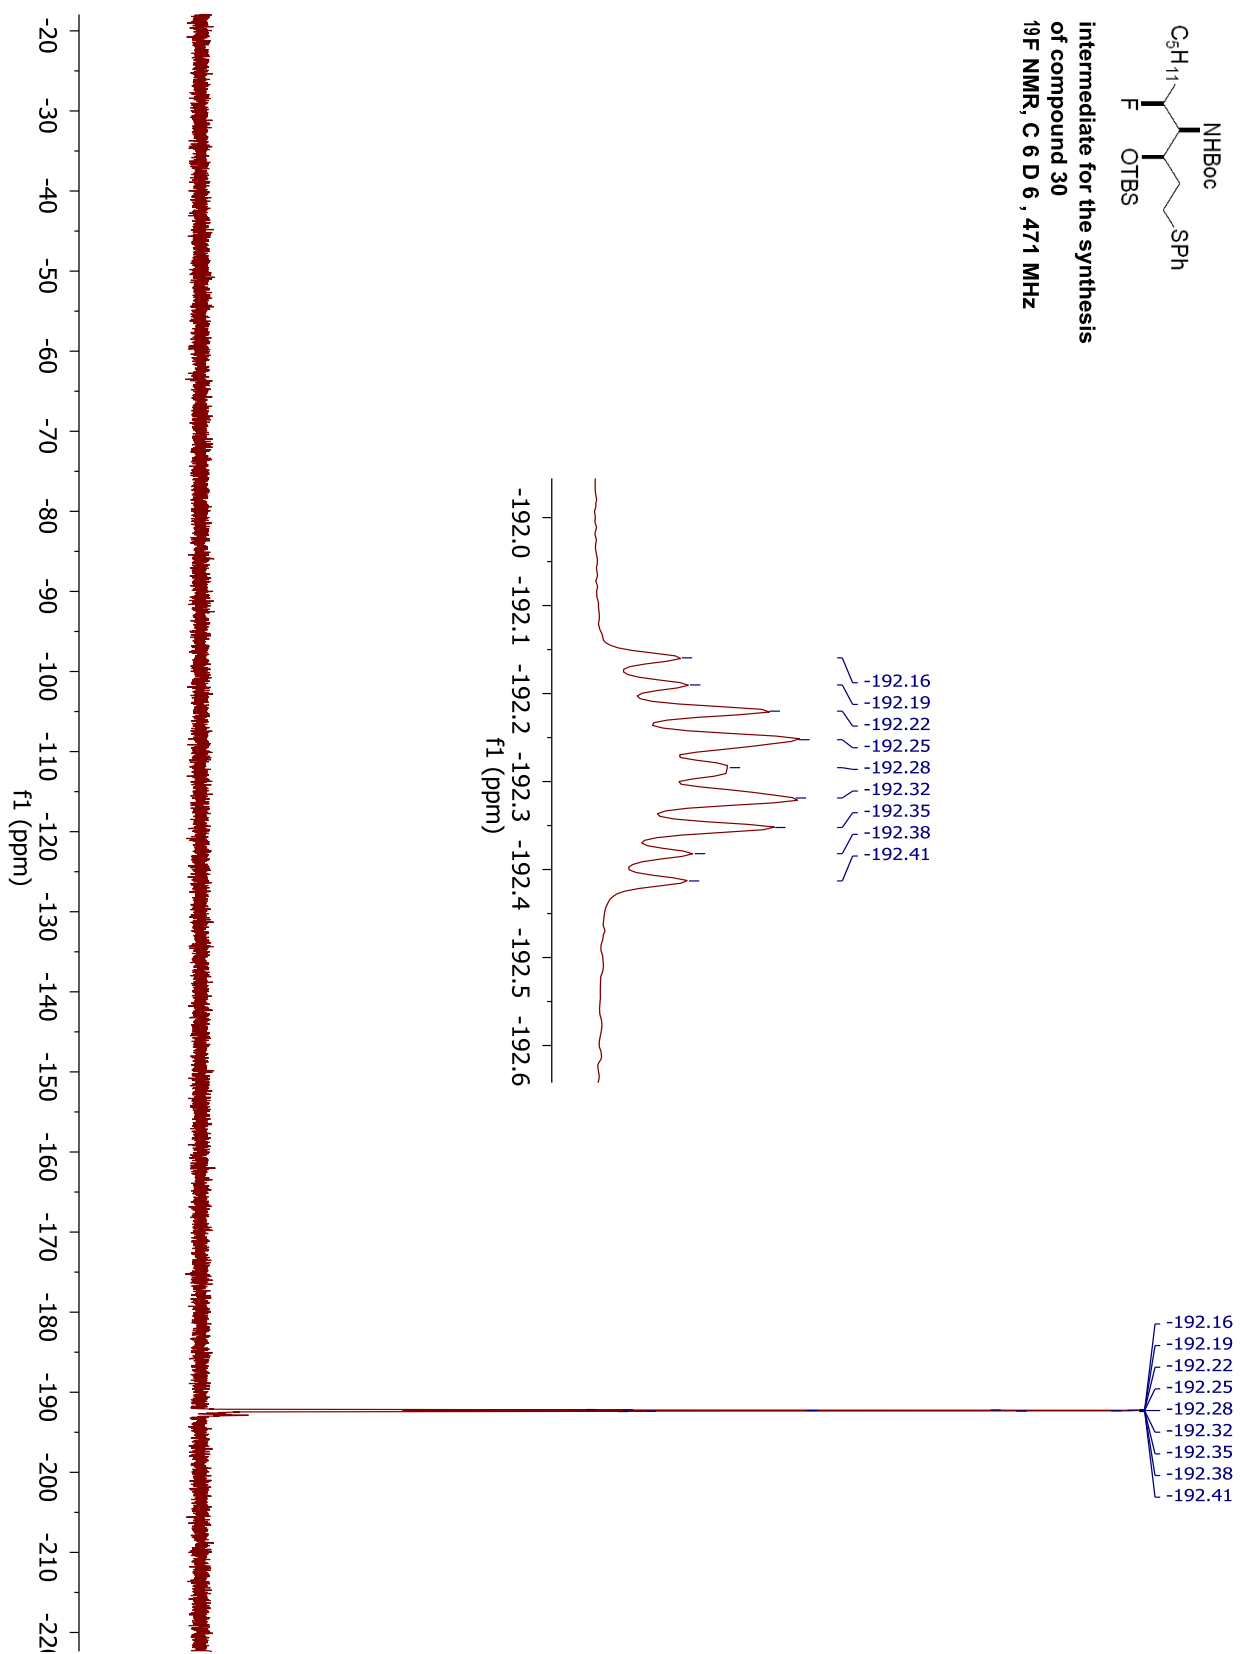

<sup>1</sup>H NMR for intermediate for synthesis of compound 30.

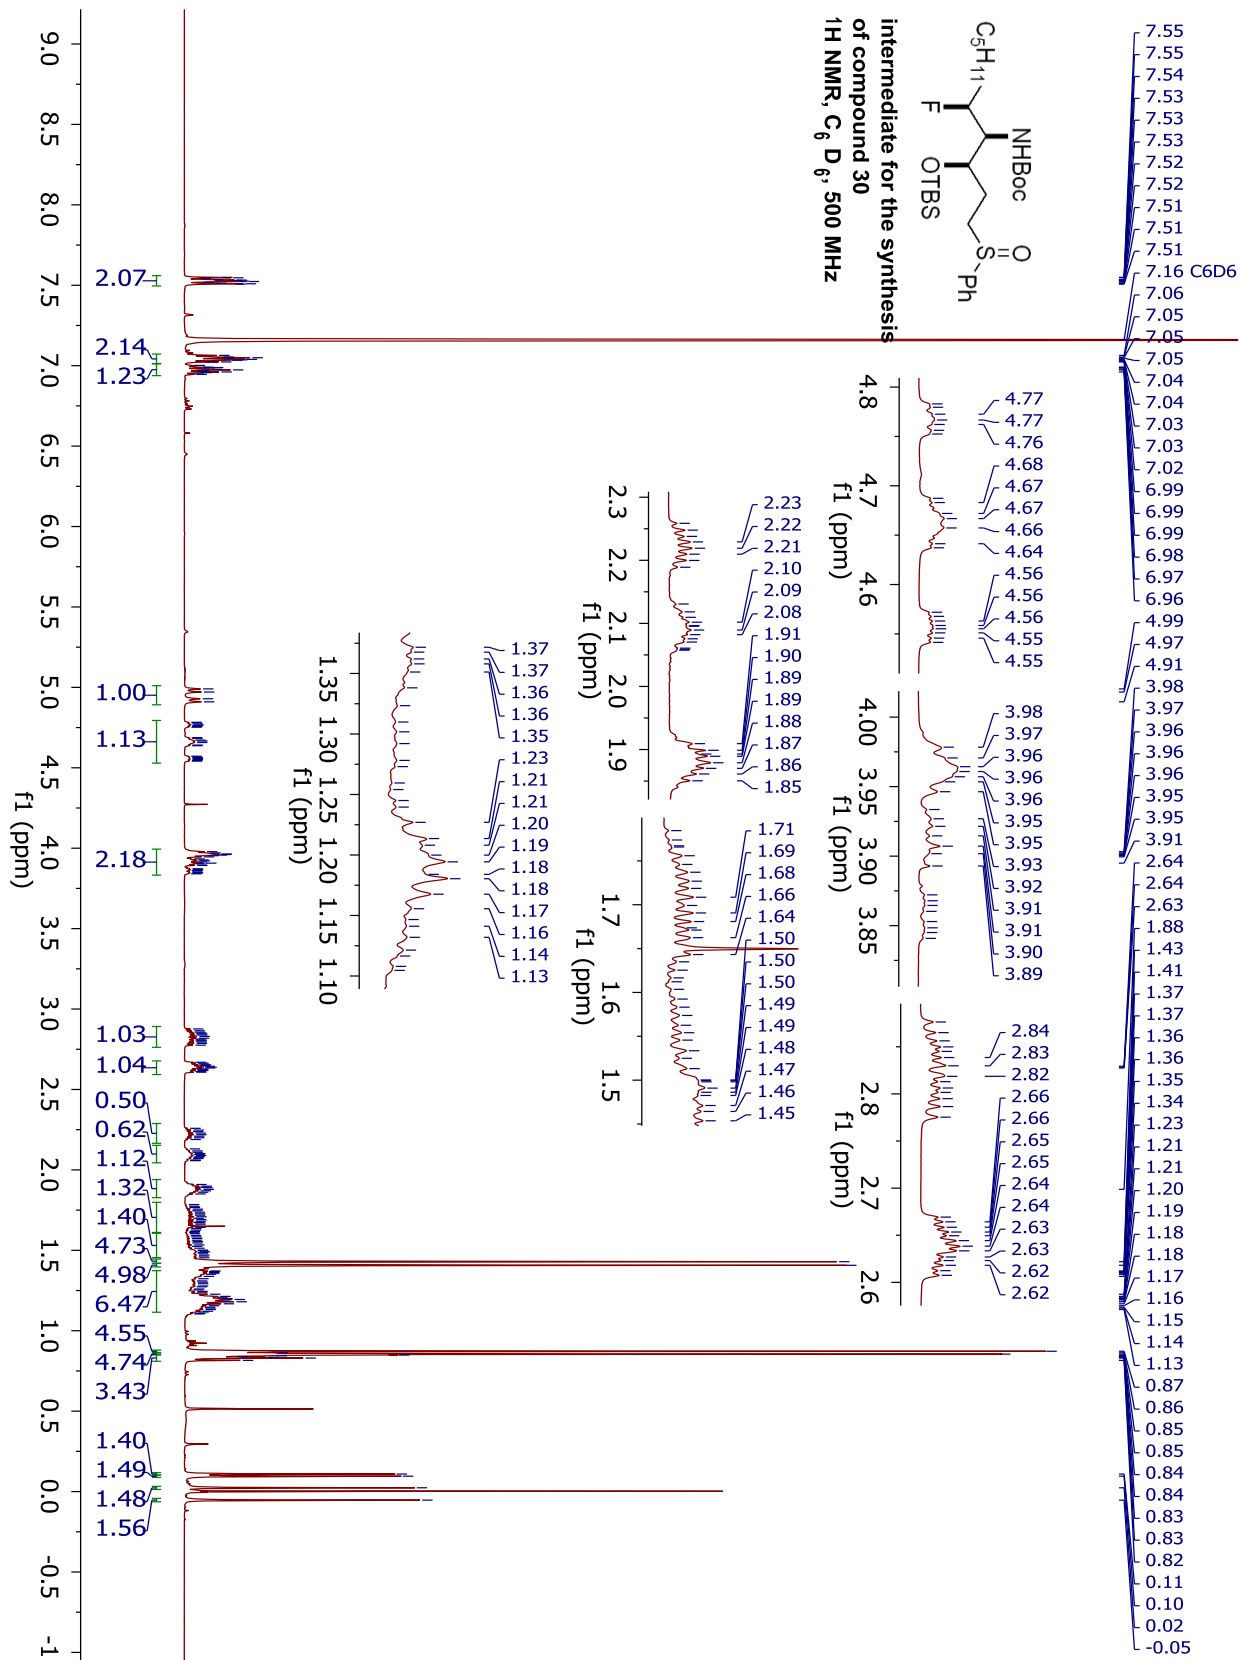

<sup>13</sup>C NMR for intermediate for synthesis of compound 30.

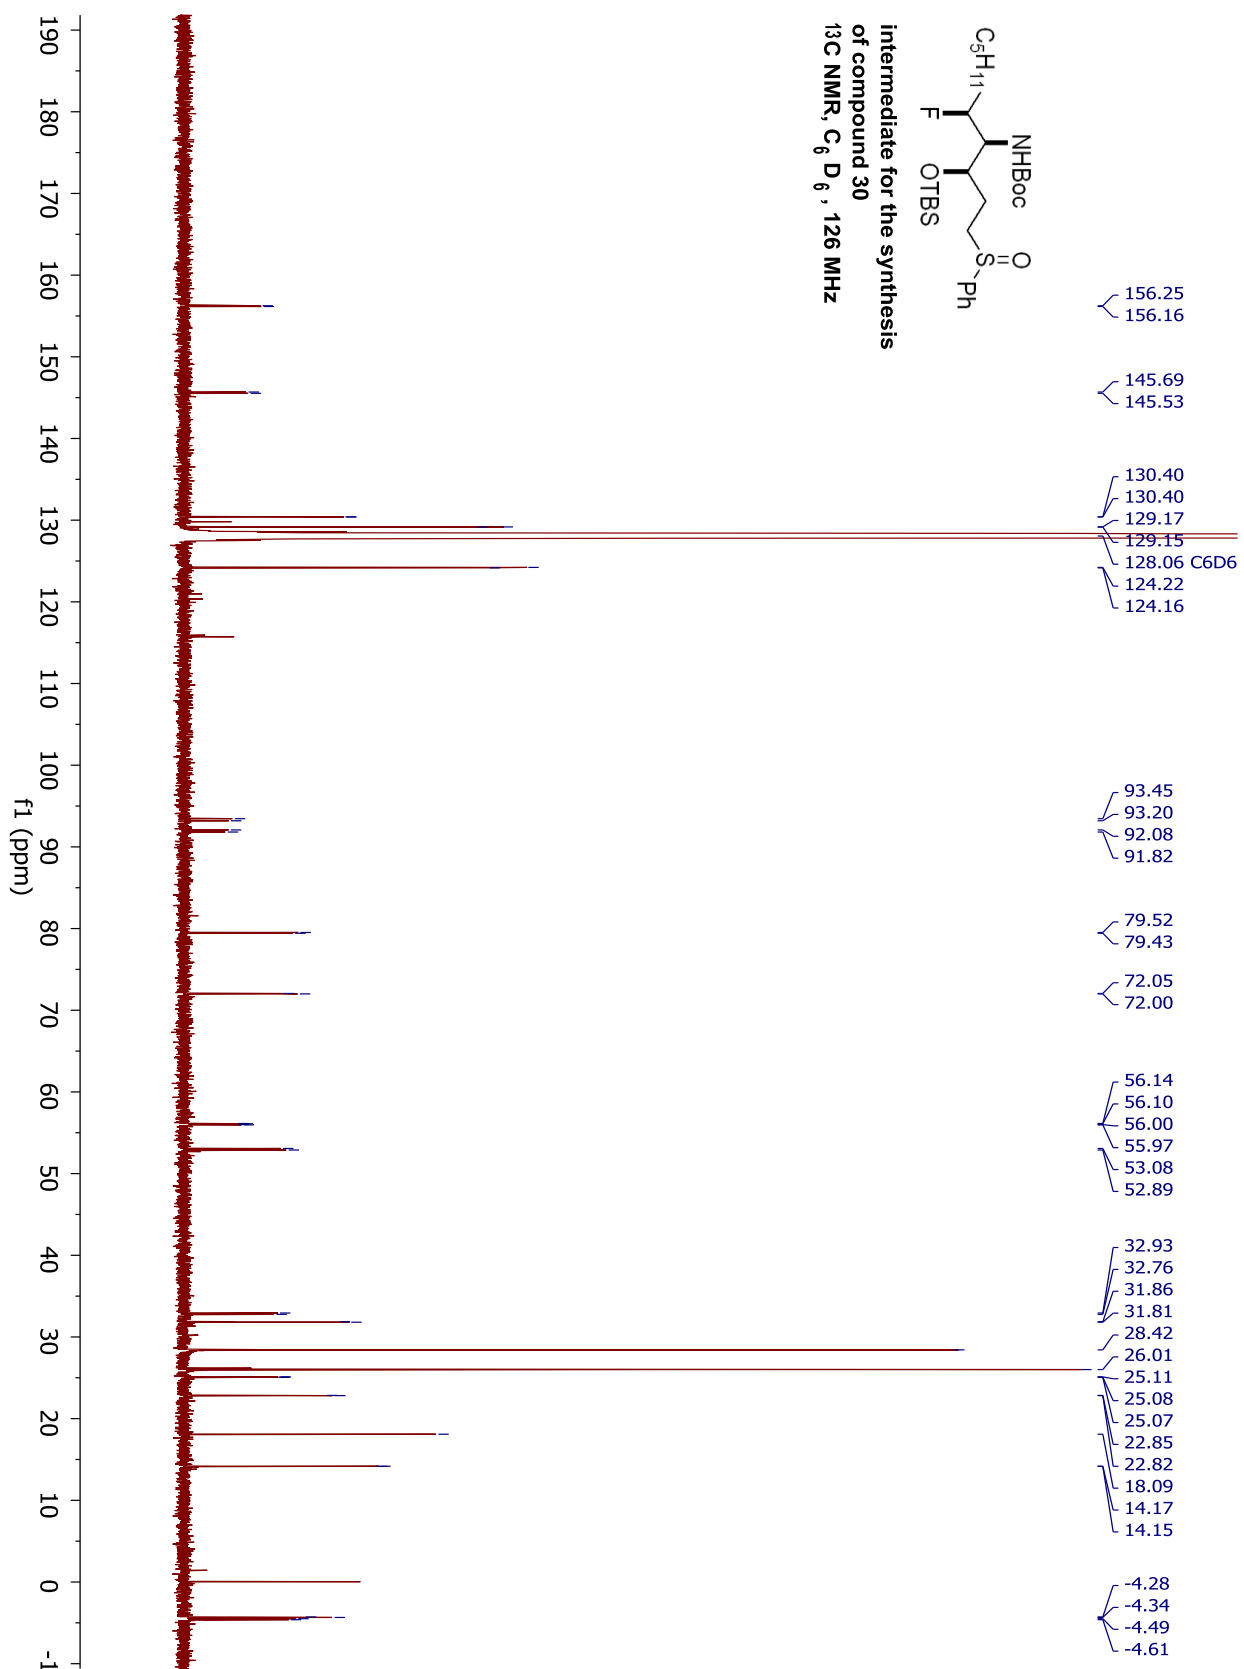

**$^{19}\text{F}$  NMR for compound intermediate for synthesis of compound 30.**

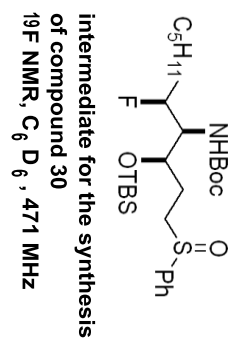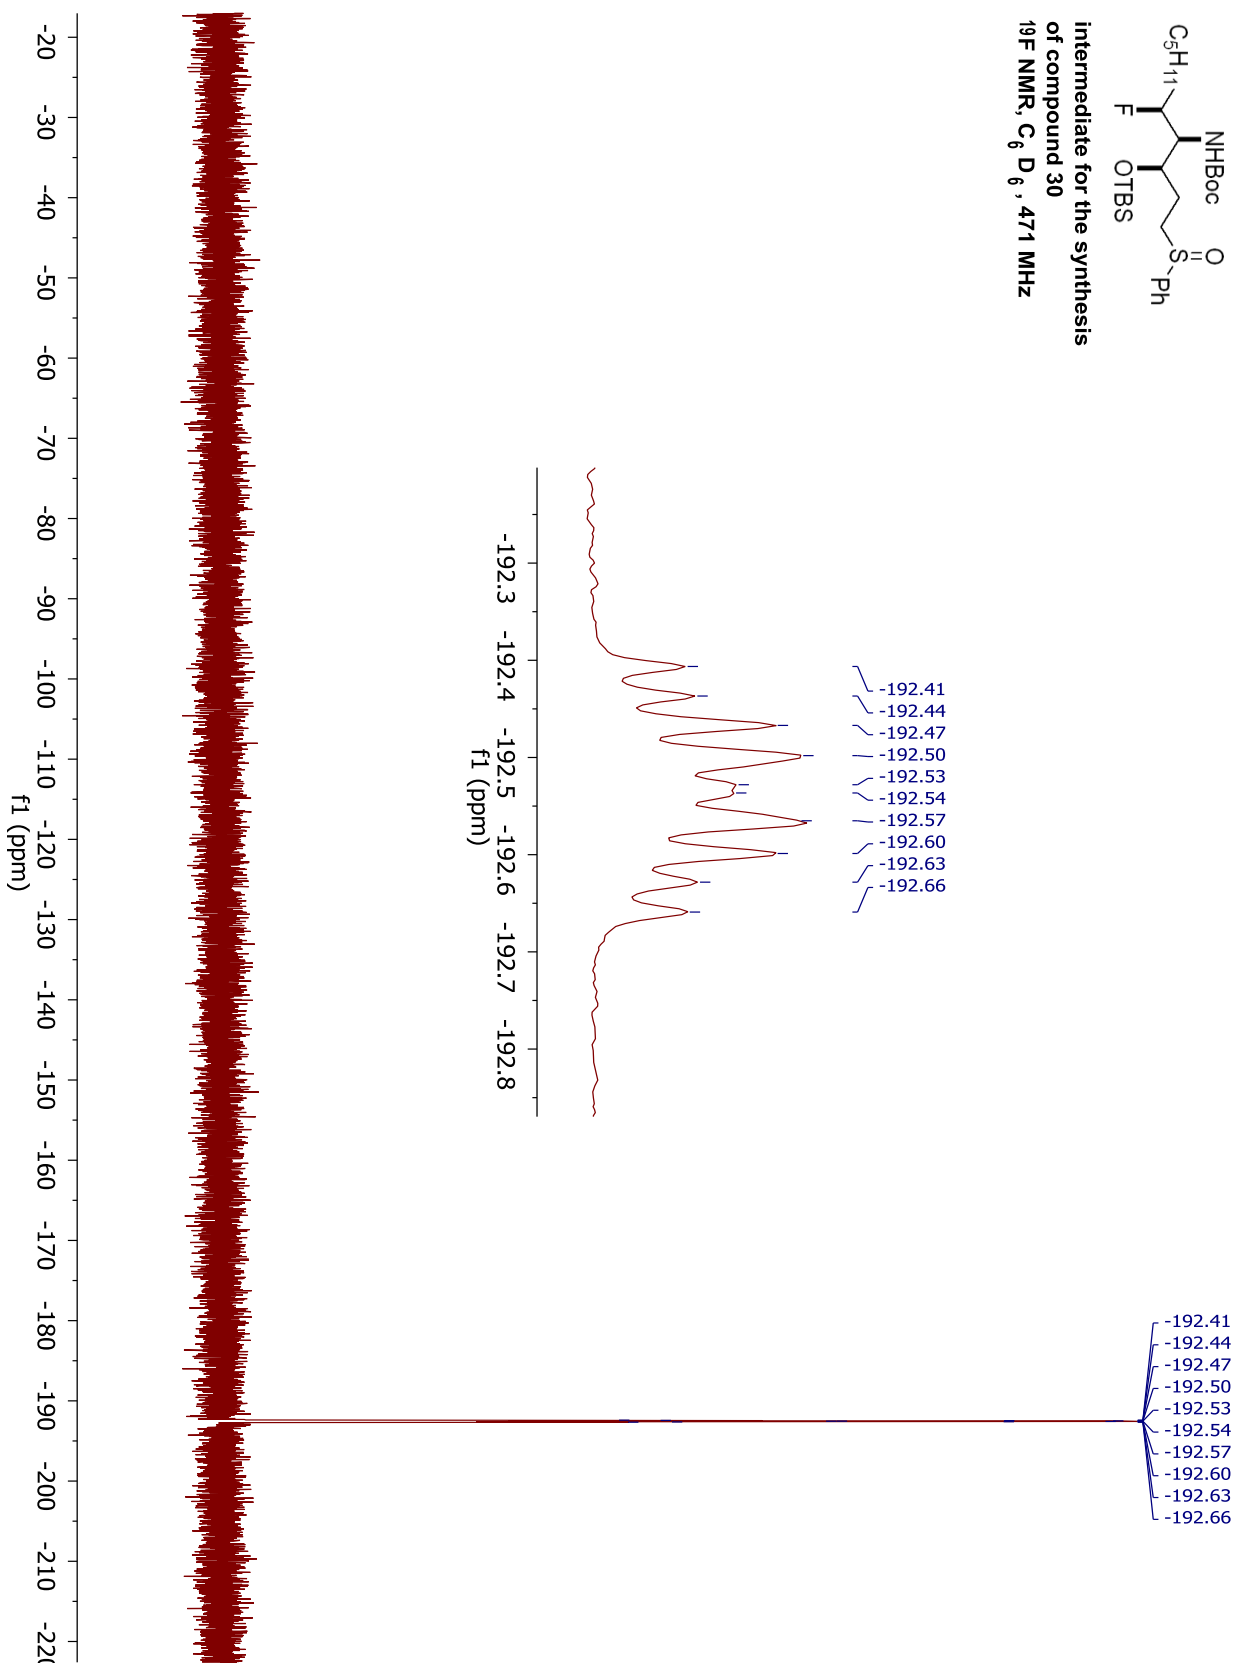



<sup>1</sup>H NMR for compound 30.

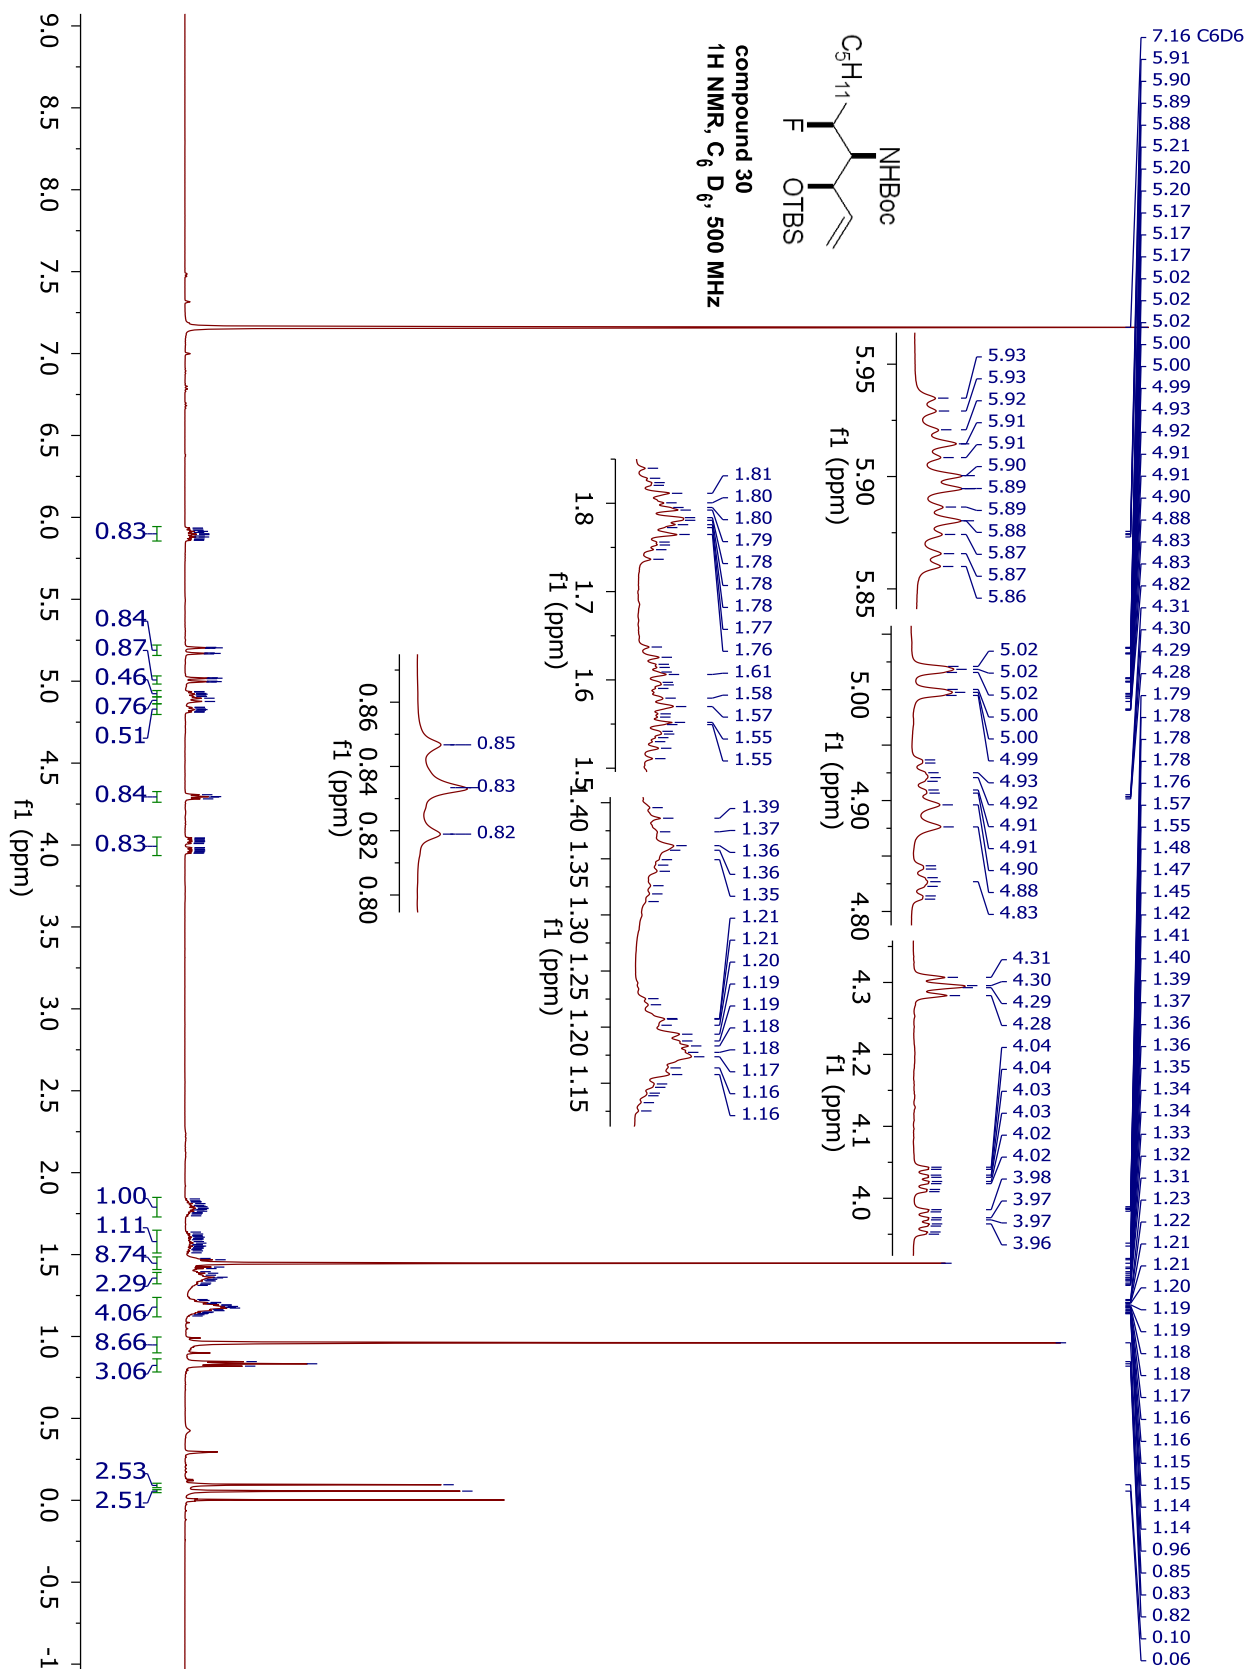

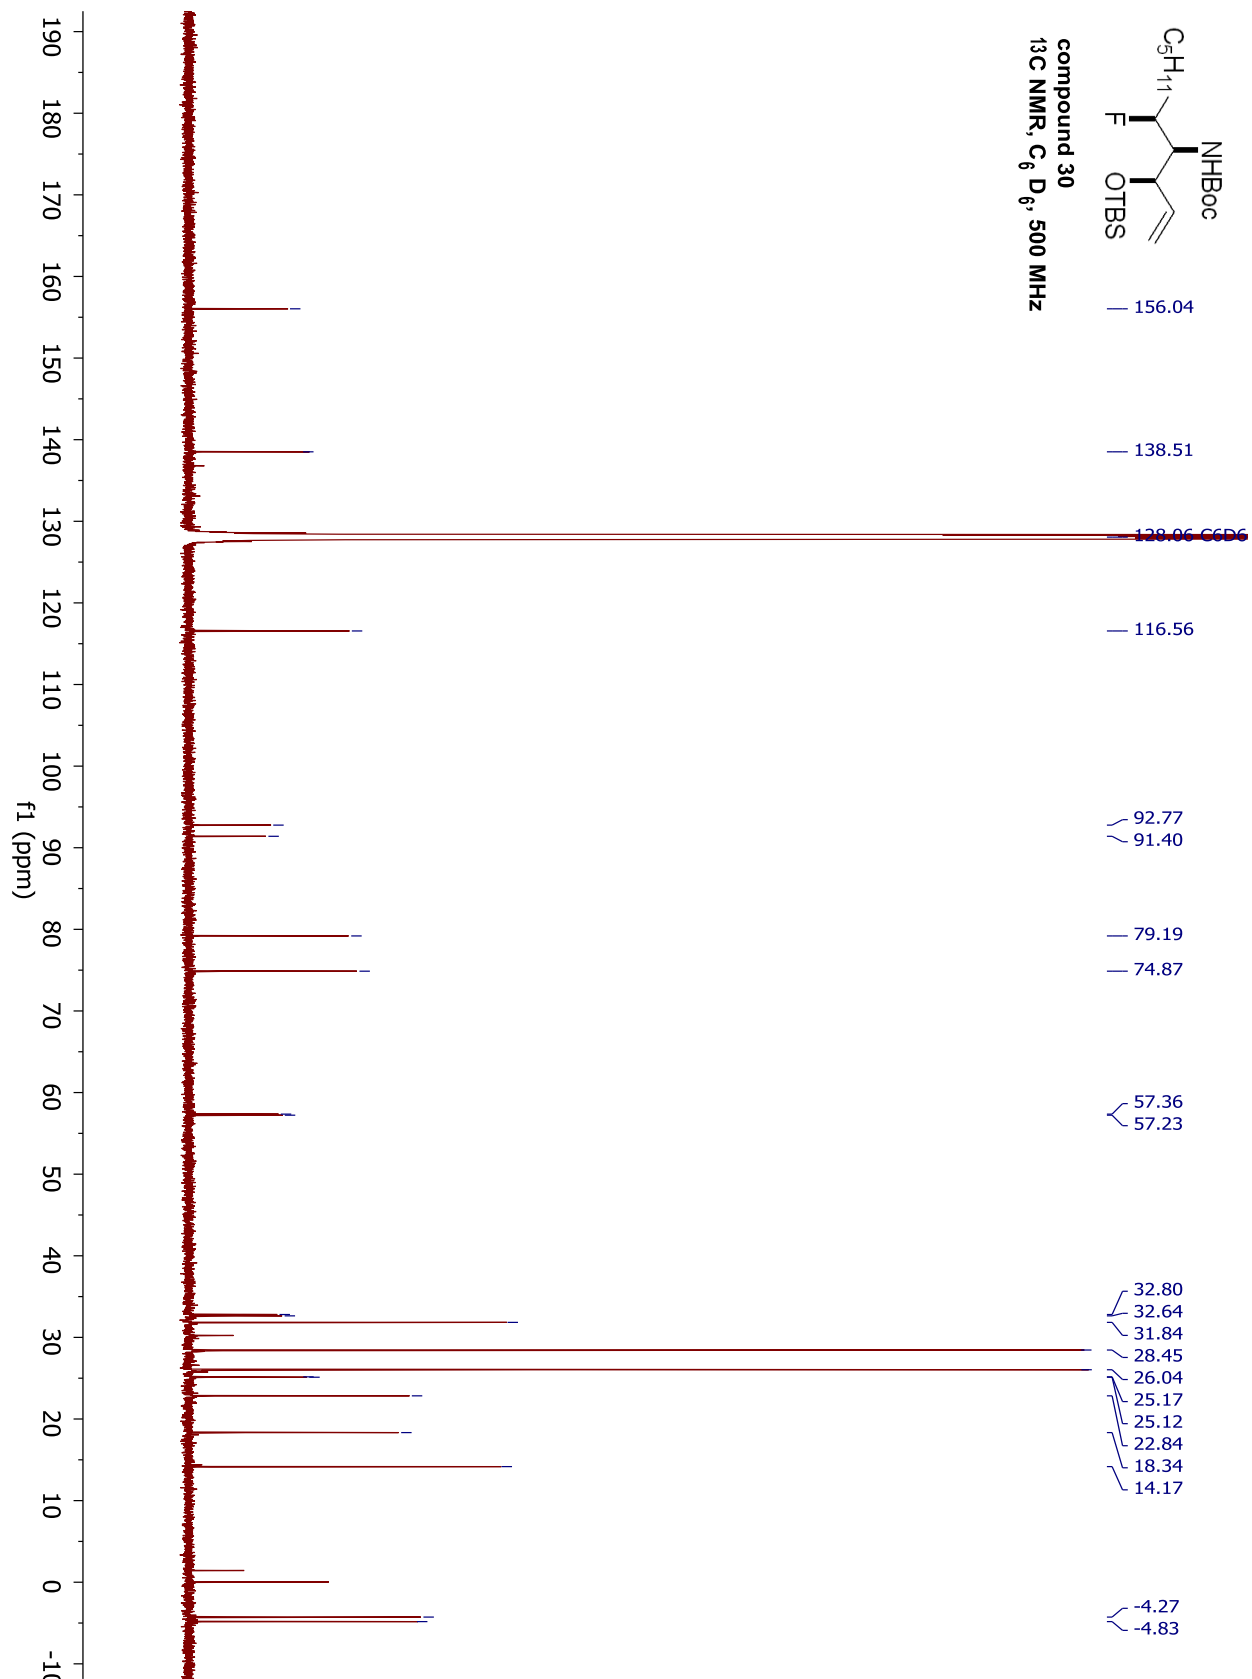

$^{13}\text{C}$  NMR for compound 30.

**$^{19}\text{F}$  NMR for compound 30.**

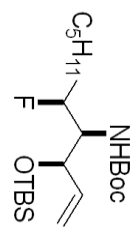

compound 30  
 $^{19}\text{F}$  NMR,  $\text{C}_6\text{D}_6$ , 471 MHz

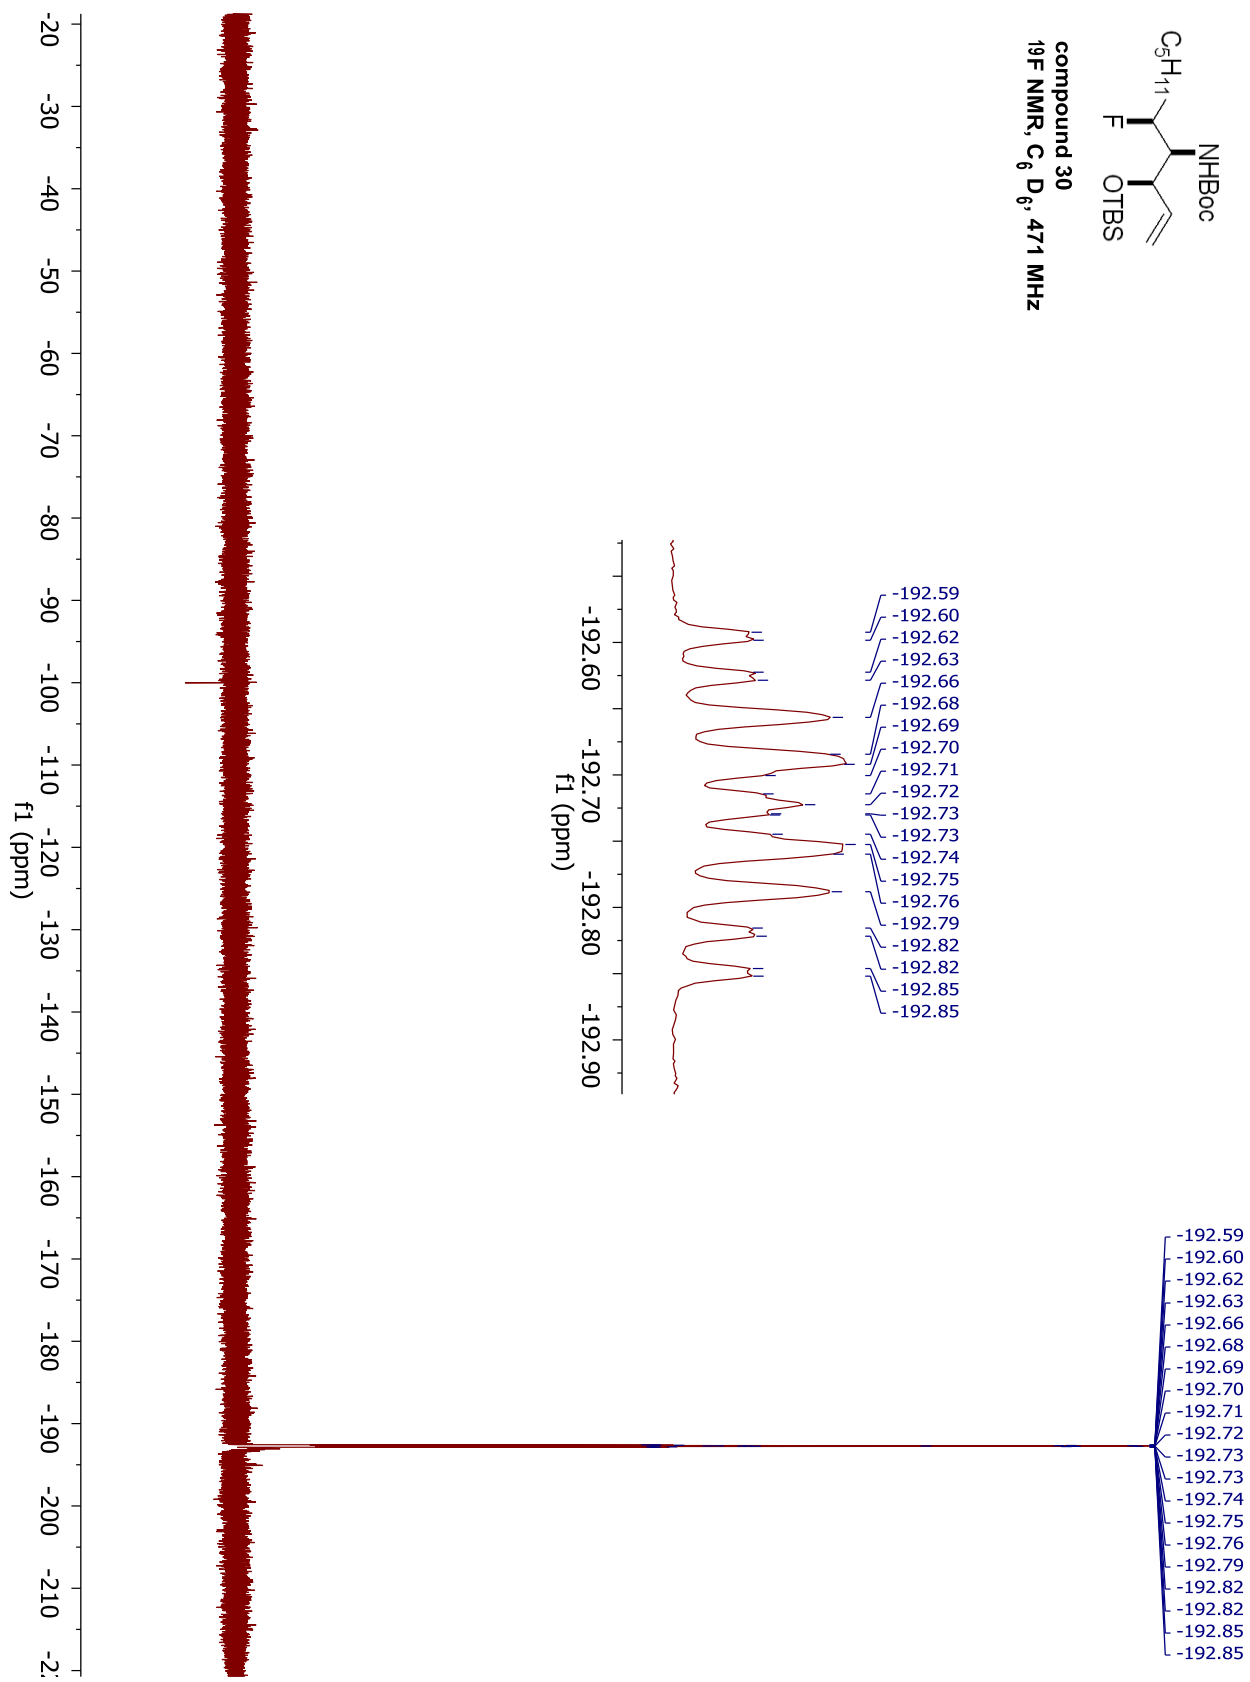

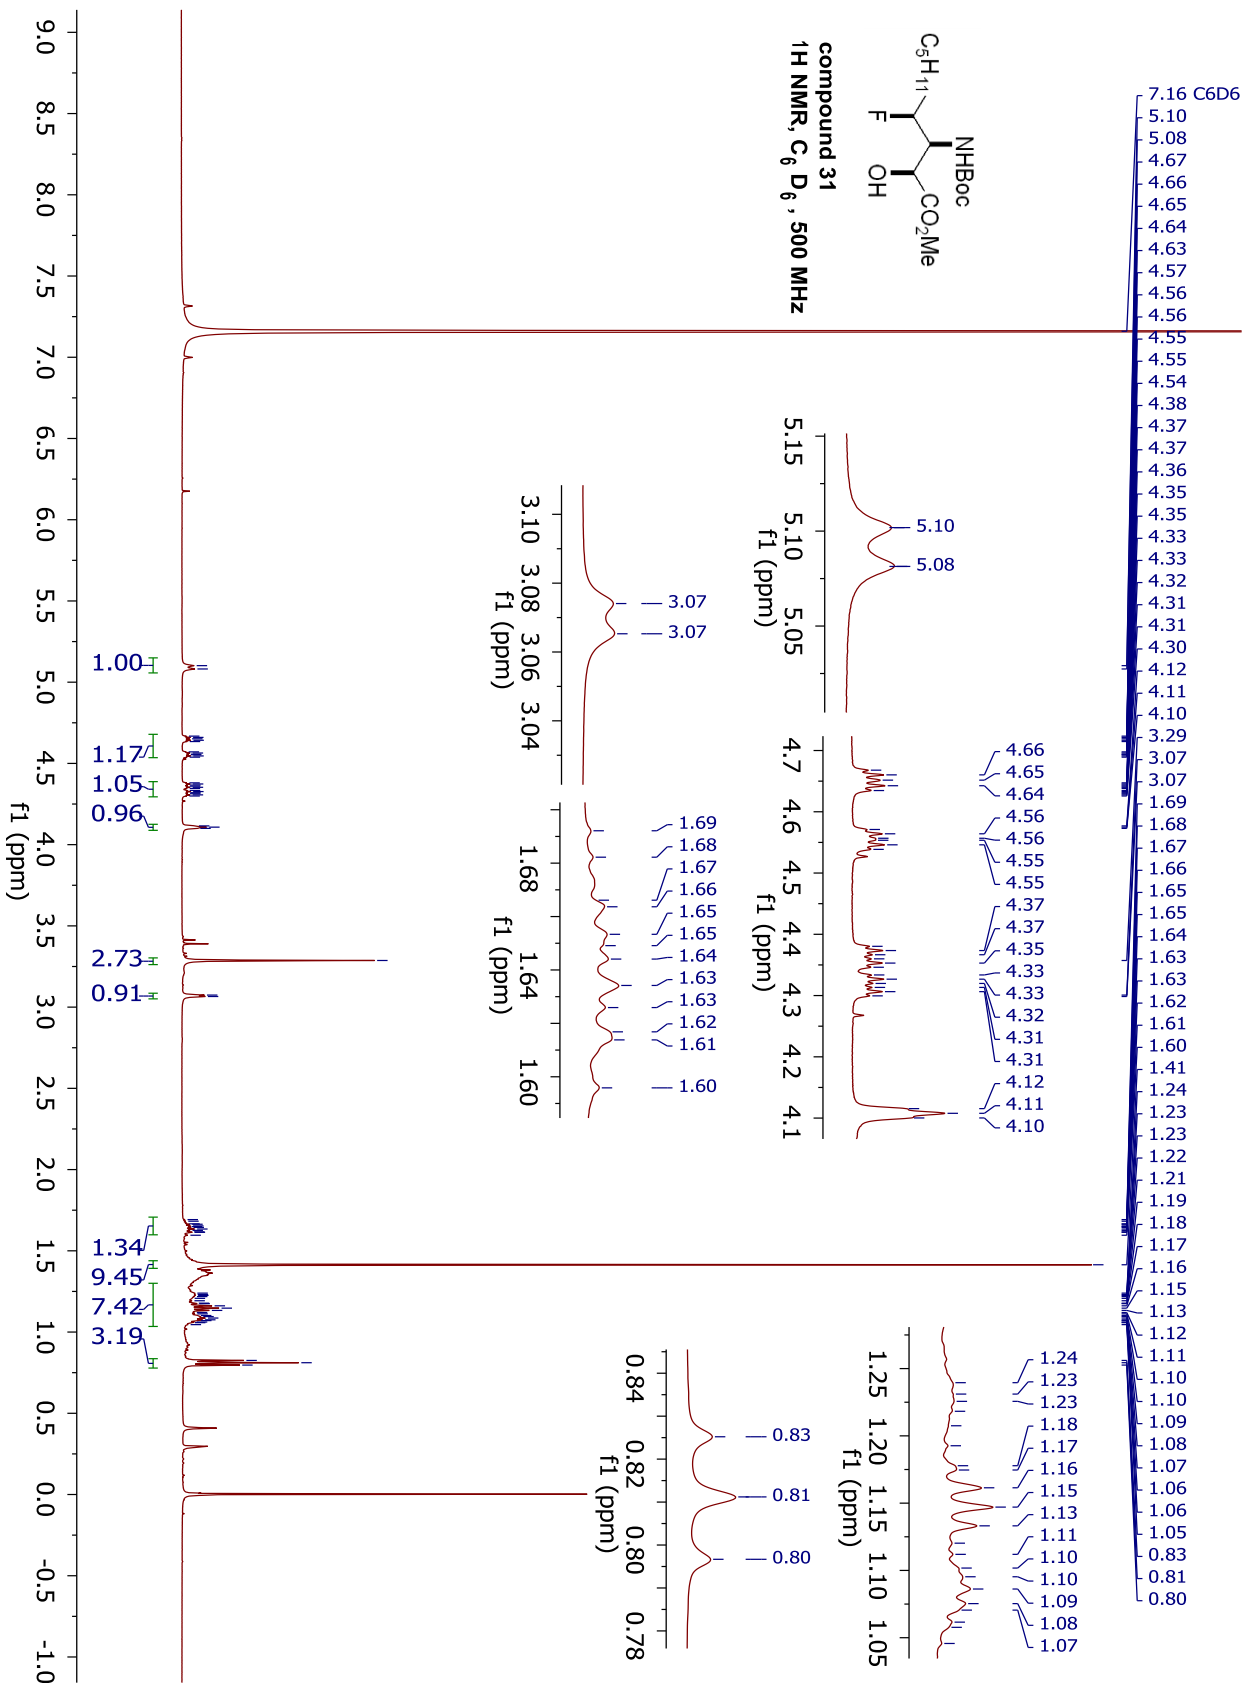

<sup>1</sup>H NMR for compound 31.

<sup>13</sup>C NMR for compound 31.

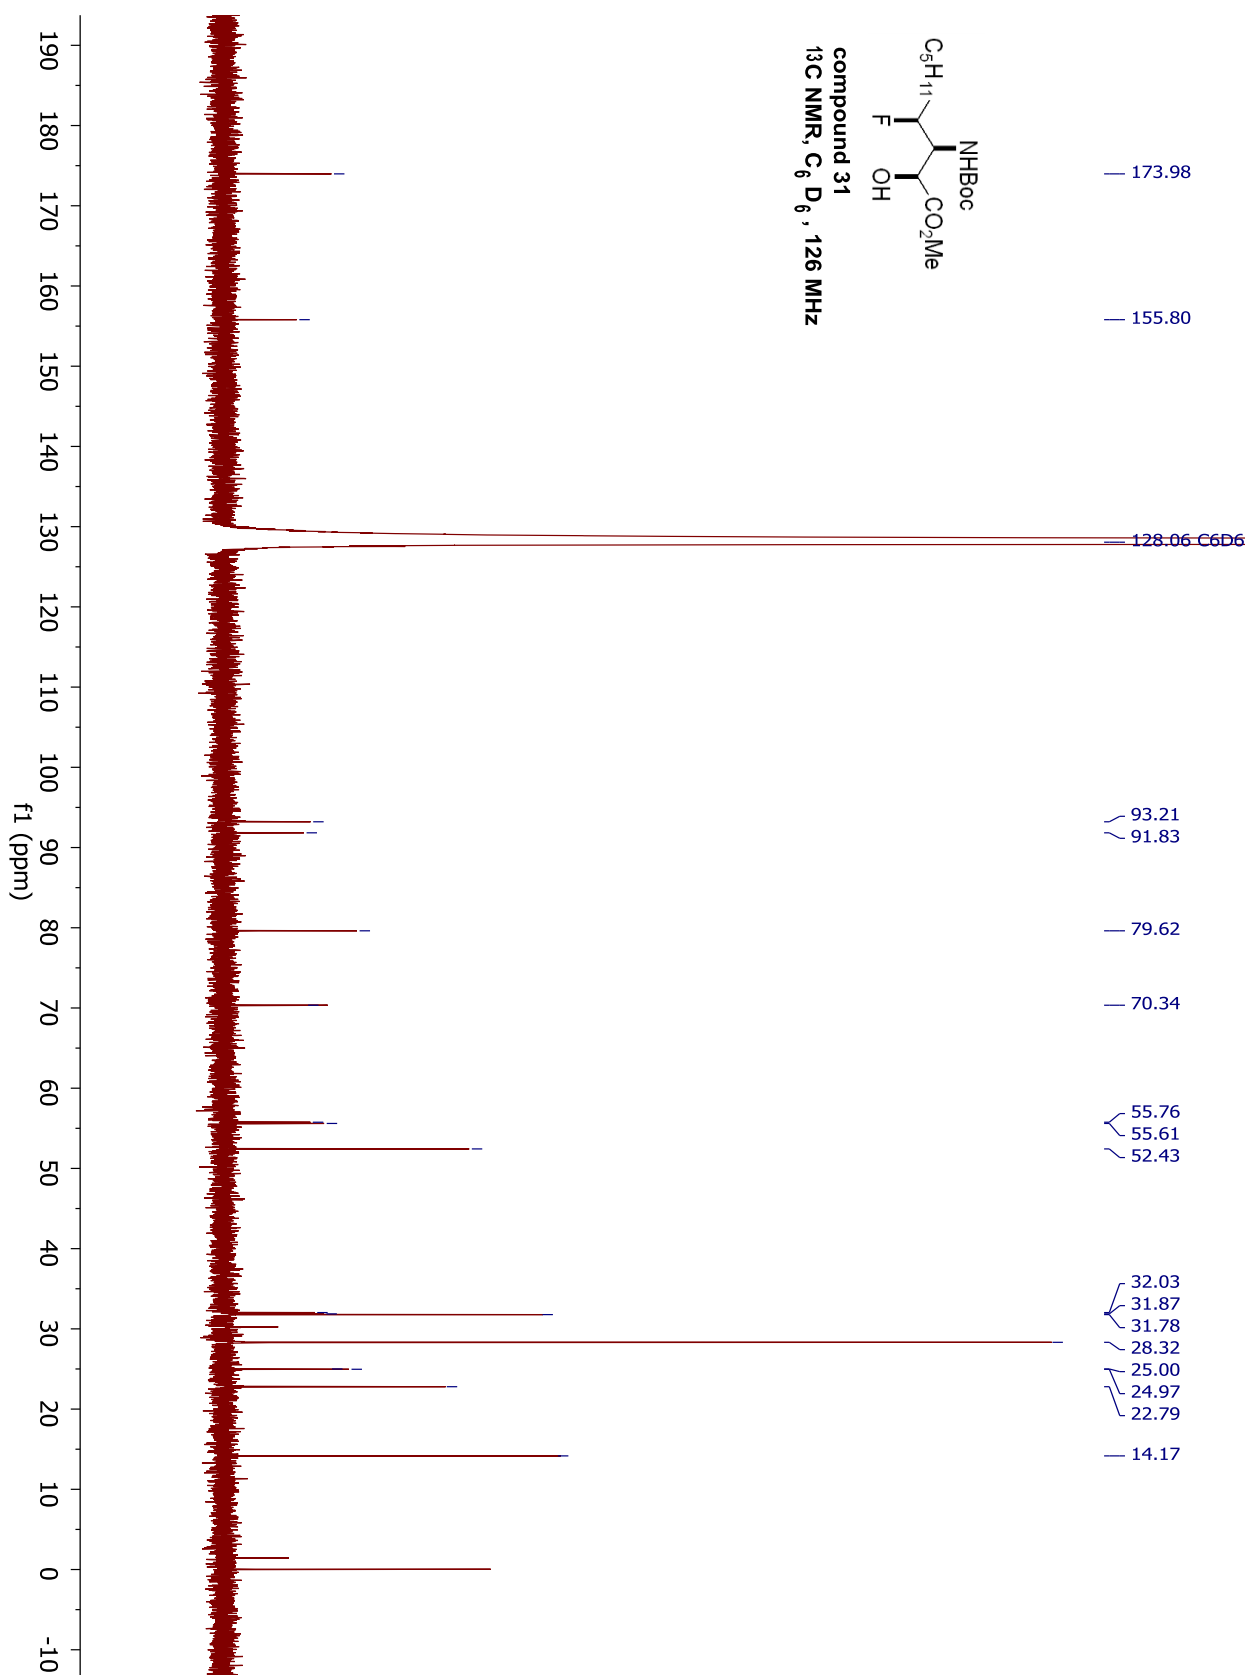

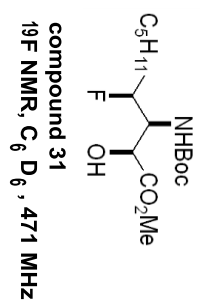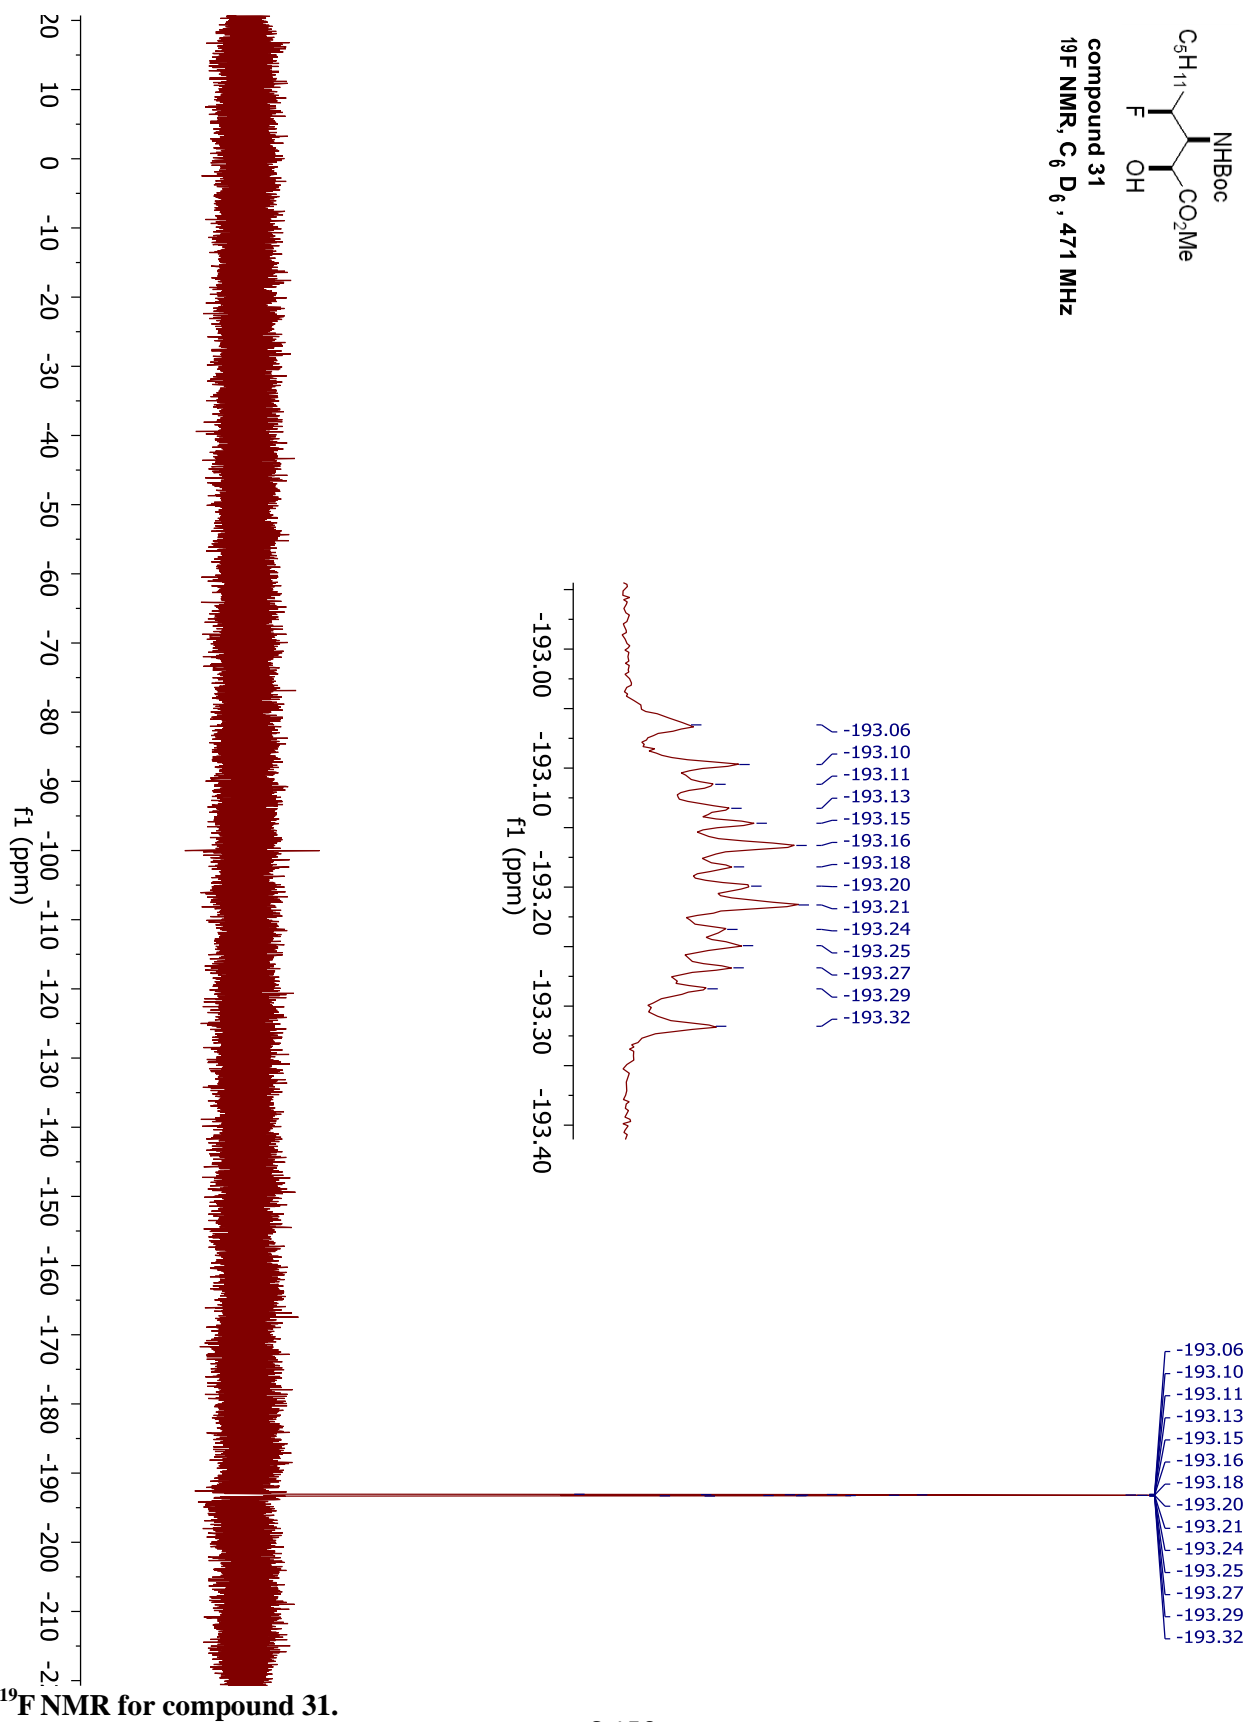



<sup>13</sup>C NMR for precursor to compound 32.

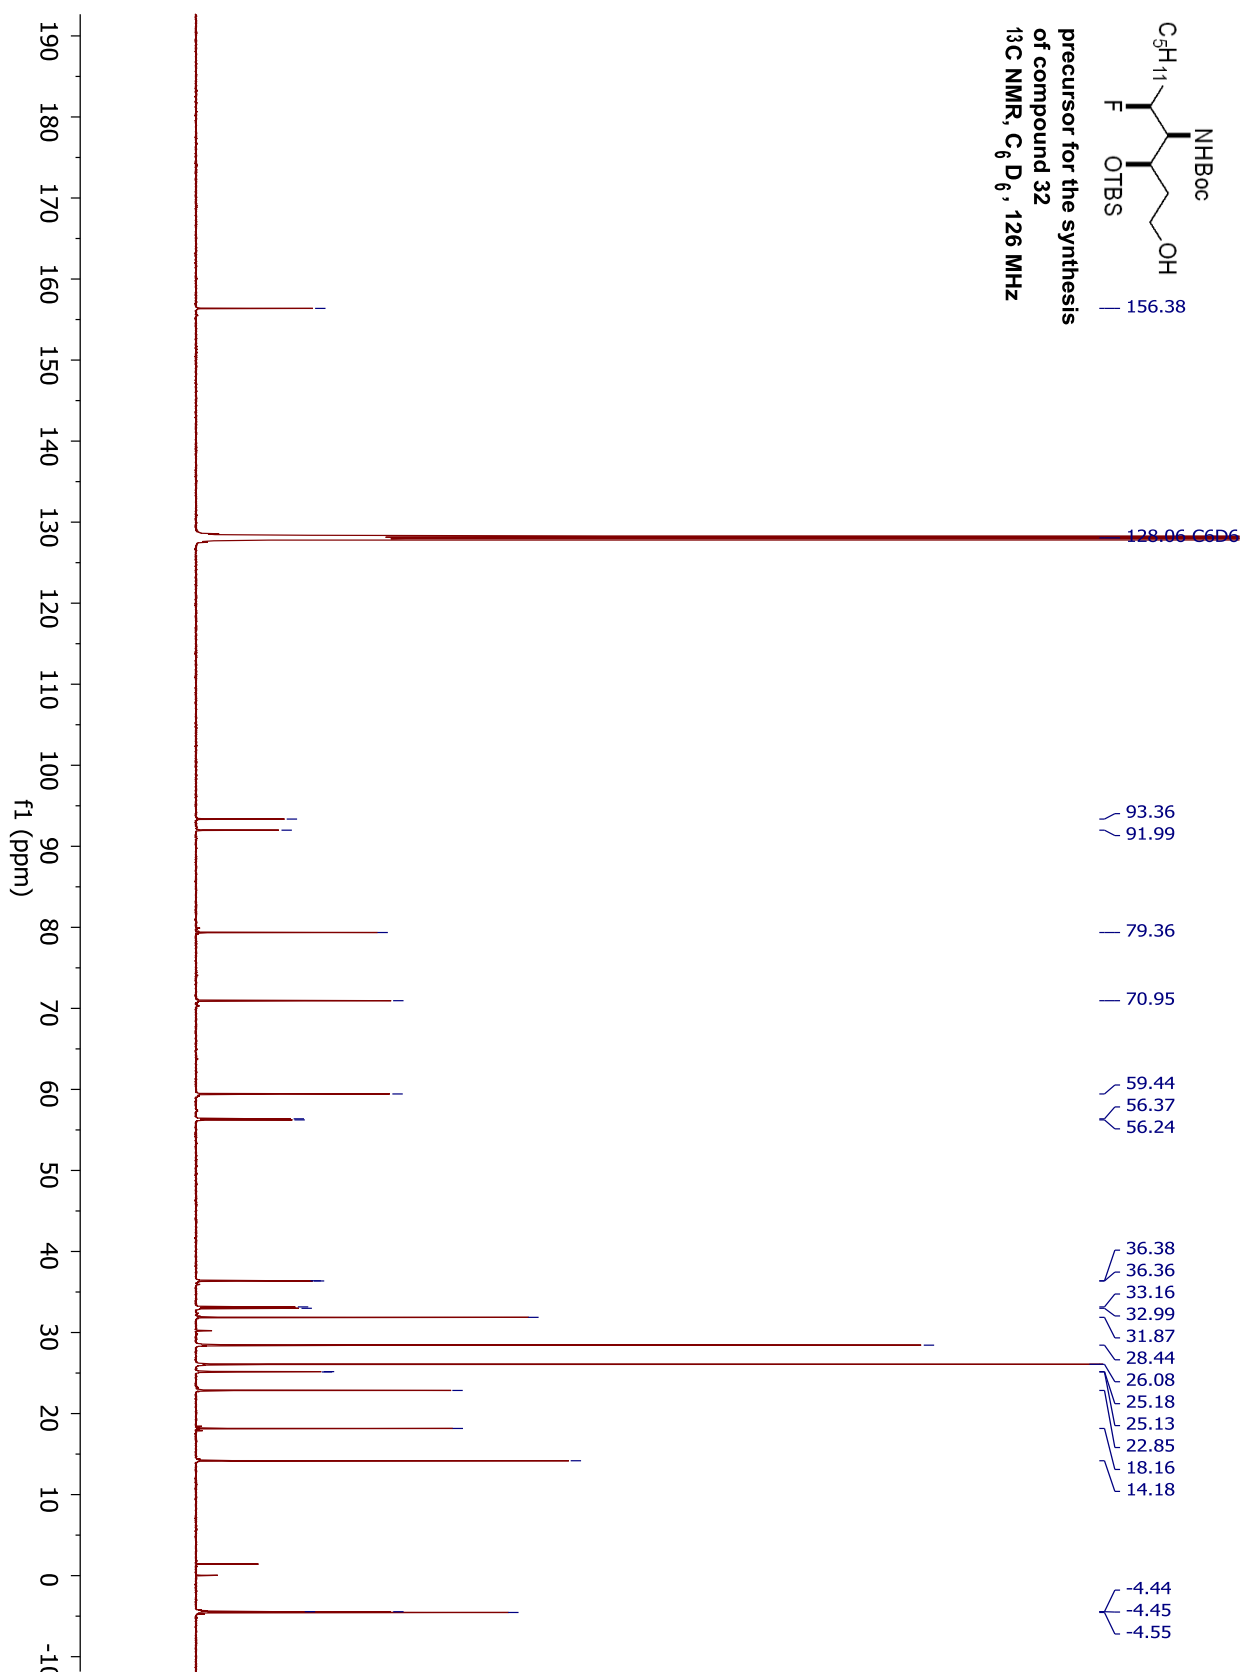



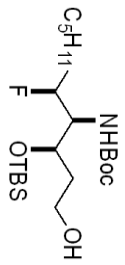

precursor for the synthesis  
of compound 32  
<sup>19</sup>F NMR, C<sub>6</sub> D<sub>6</sub>, 471 MHz

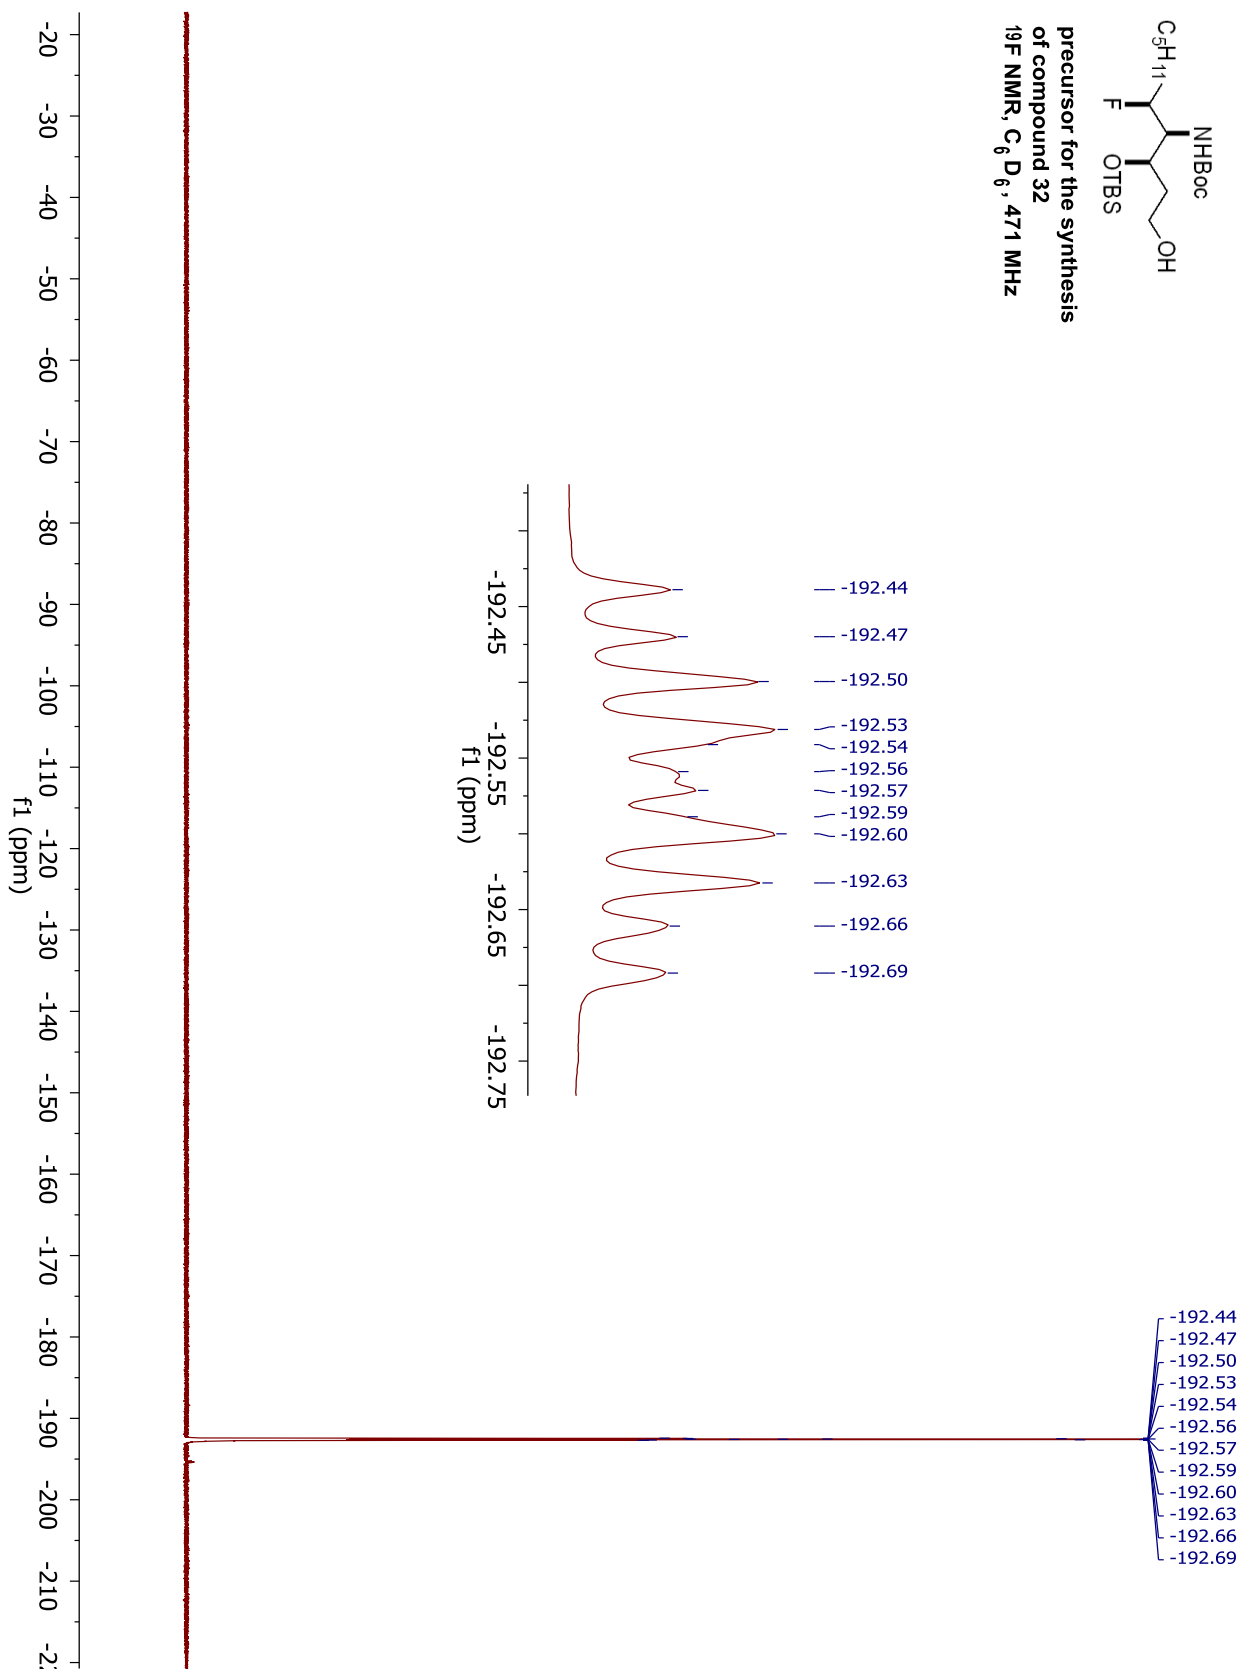

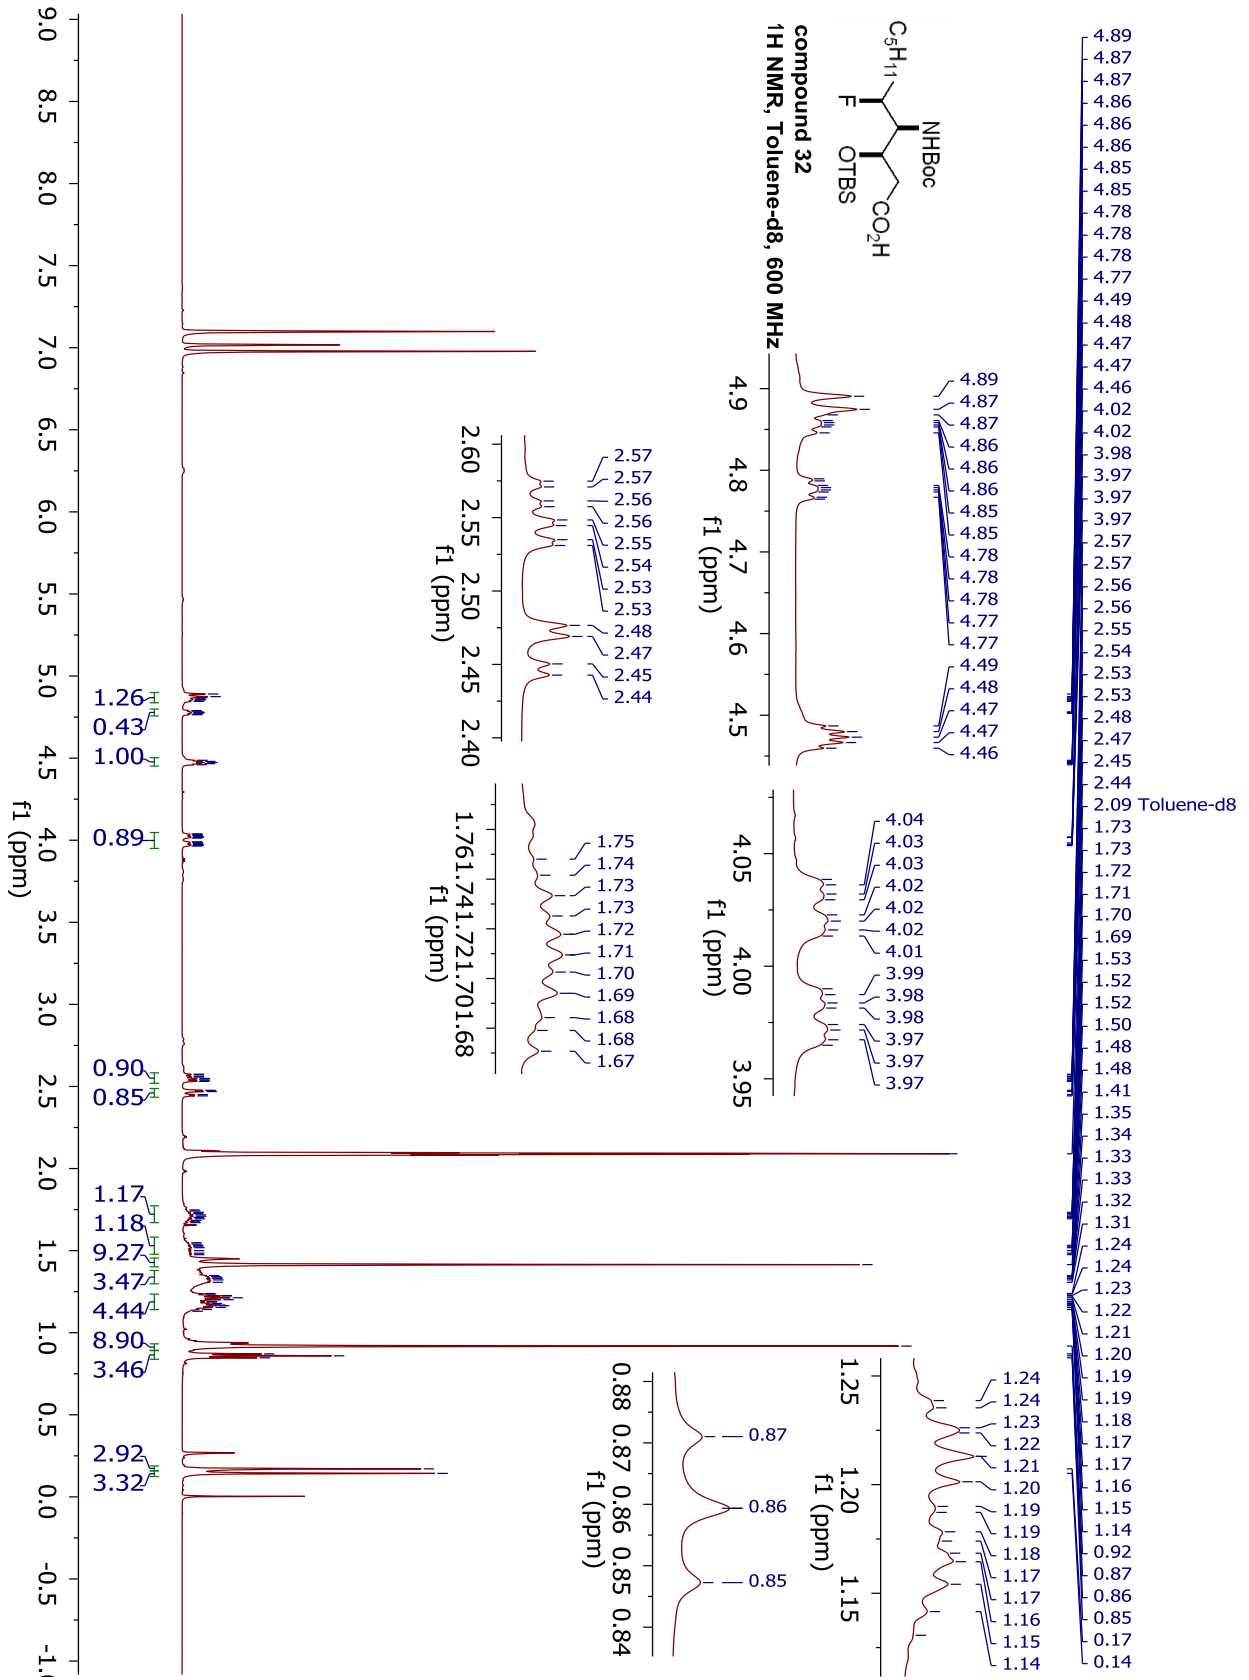

**<sup>1</sup>H NMR for compound 32.**

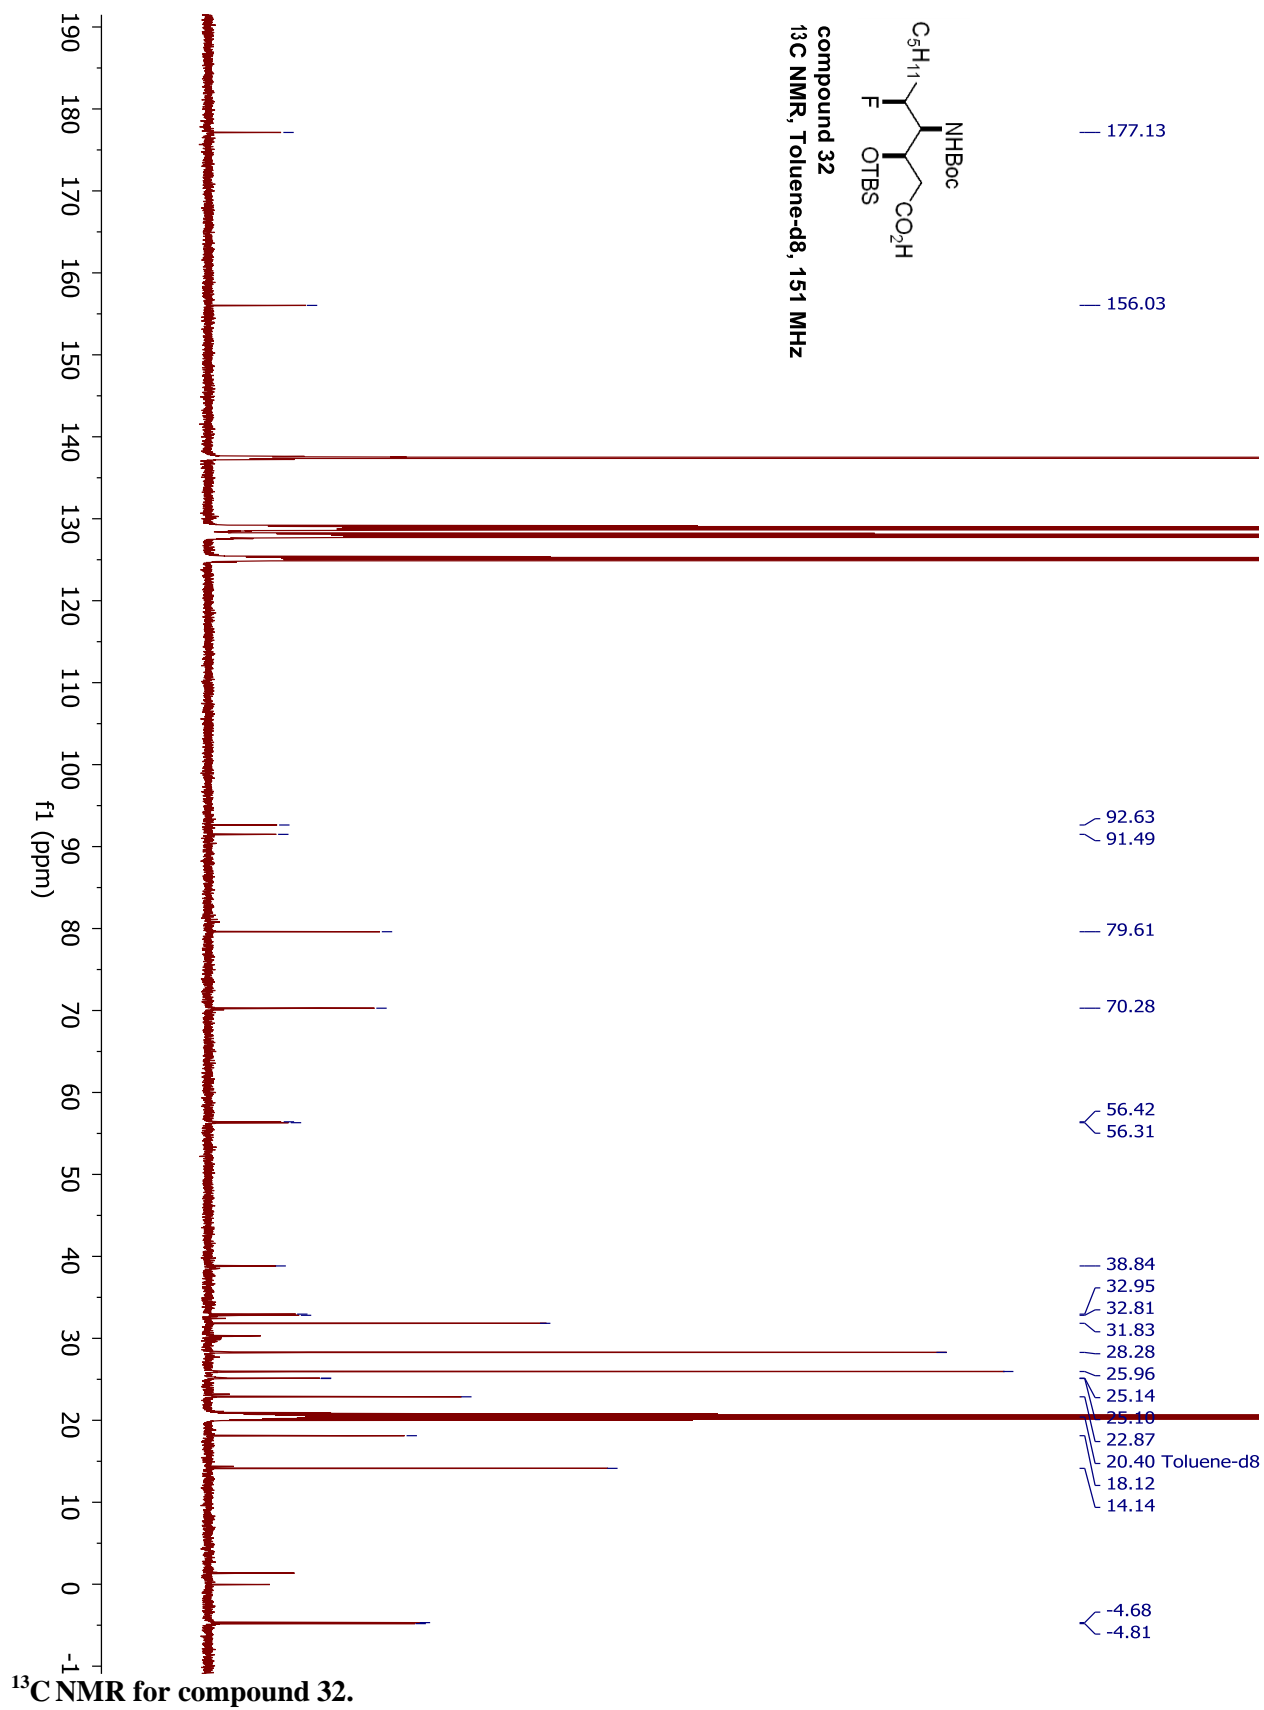

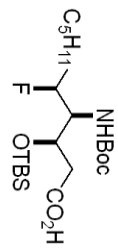

compound 32  
<sup>19</sup>F NMR, Toluene-d<sub>8</sub>, 564 MHz

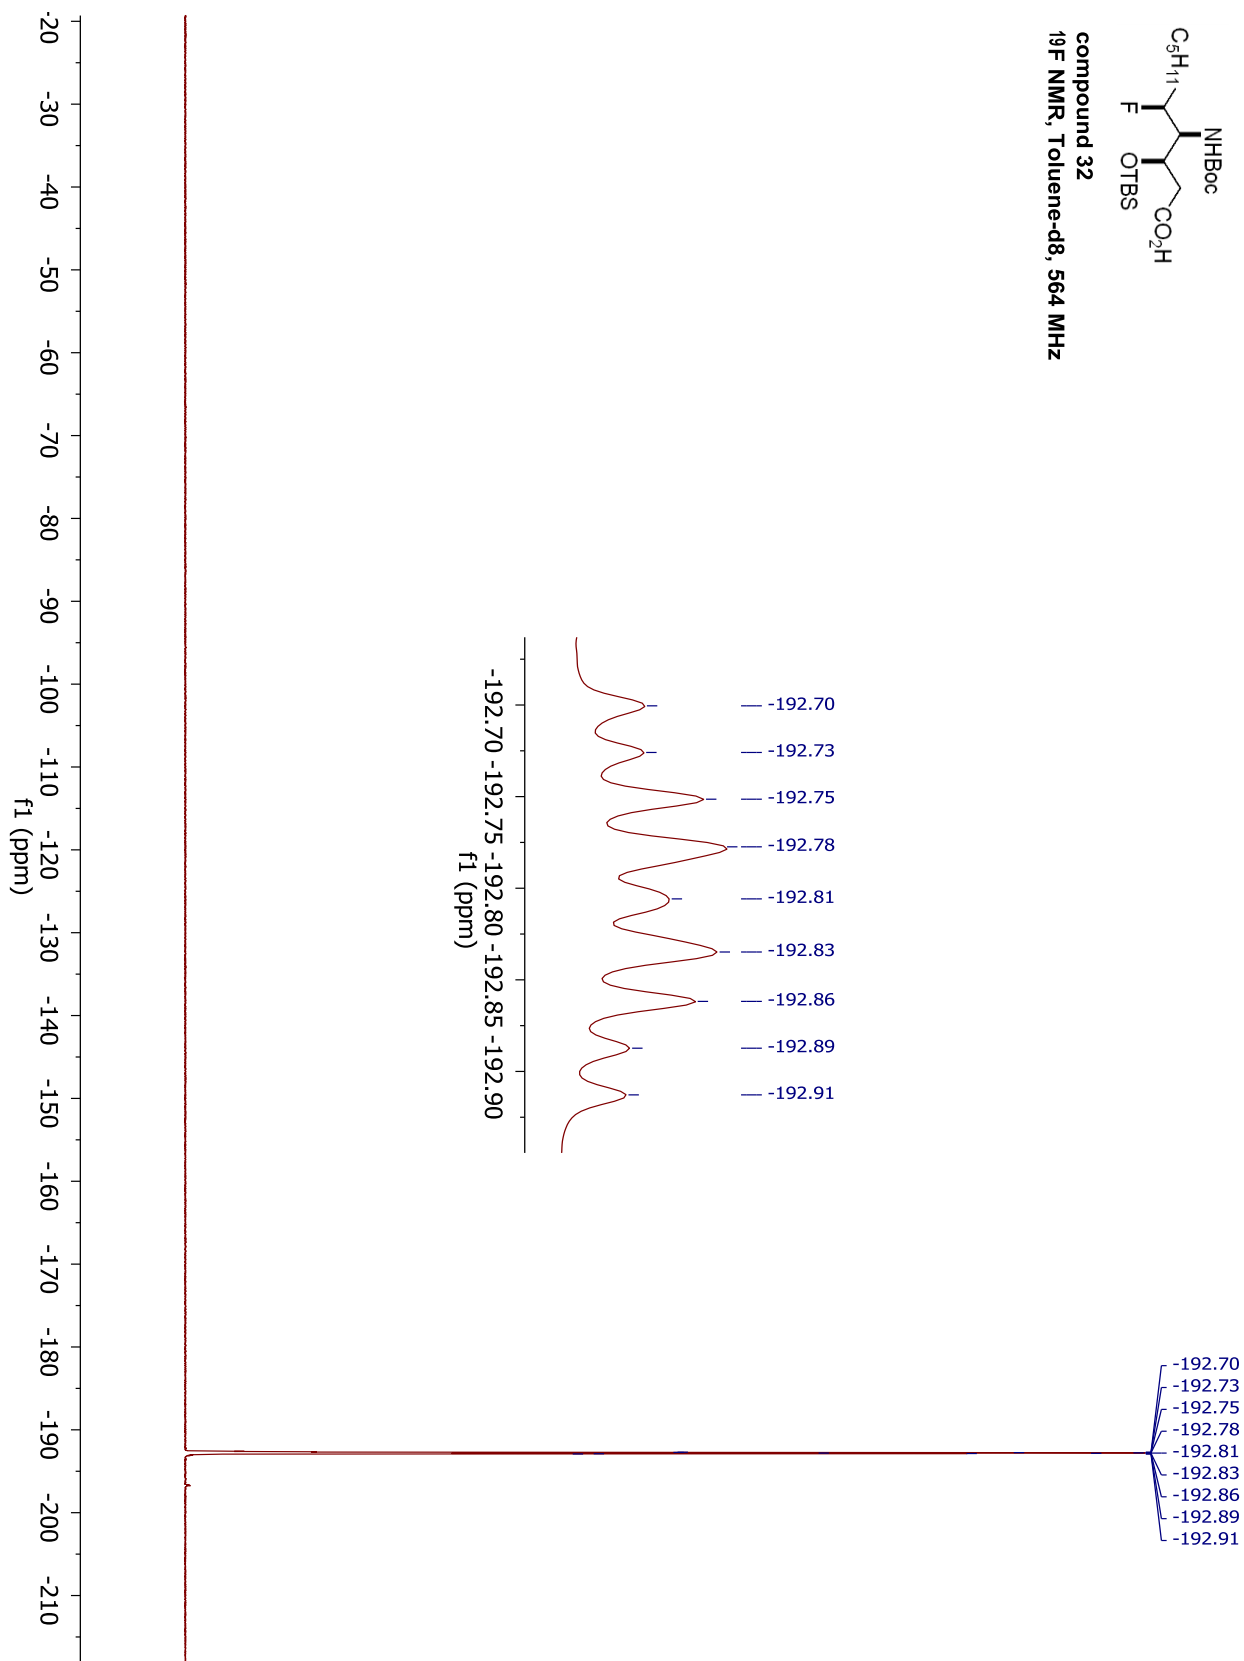

## VII. X-ray Crystallographic Data.

### Crystallographic Experimental Section for 7a. CCDC number 1548236

**Data Collection.** A colorless crystal with approximate dimensions 0.40 x 0.30 x 0.20 mm<sup>3</sup> was selected under oil under ambient conditions and attached to the tip of a MiTeGen MicroMount©. The crystal was mounted in a stream of cold nitrogen at 100(1) K and centered in the X-ray beam by using a video camera.

The crystal evaluation and data collection were performed on a Bruker Quazar SMART APEXII diffractometer with Mo K<sub>α</sub> ( $\lambda = 0.71073 \text{ \AA}$ ) radiation and the diffractometer to crystal distance of 4.96 cm.<sup>1</sup>

The initial cell constants were obtained from three series of  $\omega$  scans at different starting angles. Each series consisted of 12 frames collected at intervals of 0.5° in a 6° range about the  $\omega$  axis. The reflections were successfully indexed by an automated indexing routine built in the APEXII program suite. The final cell constants were calculated from a set of 9724 strong reflections from the actual data collection.

The data were collected by using the full sphere data collection routine to survey the reciprocal space to the extent of a full sphere to a resolution of 0.79 Å. A total of 60494 data were harvested by collecting 4 sets of frames with 0.5° scans in  $\omega$  and  $\phi$  with exposure times of 40 sec per frame. These highly redundant datasets were corrected for Lorentz and polarization effects. The absorption correction was based on fitting a function to the empirical transmission surface as sampled by multiple equivalent measurements.<sup>2</sup>

### Structure Solution and Refinement

The systematic absences in the diffraction data were consistent for the space groups  $P\bar{1}$  and  $P1$ . The  $E$ -statistics strongly suggested the centrosymmetric space group  $P\bar{1}$  that yielded chemically reasonable and computationally stable results of refinement.<sup>2-4</sup>

A successful solution by the direct methods provided most non-hydrogen atoms from the  $E$ -map. The remaining non-hydrogen atoms were located in an alternating series of least-squares cycles and difference Fourier maps. All non-hydrogen atoms were refined with anisotropic displacement coefficients. All hydrogen atoms (except those attached to N atoms) were included in the structure factor calculation at idealized positions and were allowed to ride on the neighboring atoms with relative isotropic displacement coefficients.

There are four symmetry-independent diastereomers in the asymmetric unit. The chiral centers C7, C10, and C11 in molecules Si1 and Si1a are  $S,R,R$ , whereas in molecules Si1b and Si1c/d/e the configurations are  $R,S,S$ .

There is positional disorder in two parts of molecule Si1c/d/e. The SiMe<sub>2</sub><sup>t</sup>Bu group is disordered over three positions in a 55.9(2) : 32.1(2) : 12.0(2) ratio. The n-butyl section of the 1-fluorohexyl is disordered over two positions with the major component occupancy of 74.5(10)%. The disordered parts were refined with restraints and constraints.

The crystal selected for the single-crystal X-ray diffraction experiment proved to be a non-merohedral twin with a 41.68(9)% second component contribution. The twin components are related by a 180.0° rotation about the *a* axis.

The final least-squares refinement of 1061 parameters against 17804 data resulted in residuals *R* (based on  $F^2$  for  $I \geq 2\sigma$ ) and  $wR$  (based on  $F^2$  for all data) of 0.0498 and 0.1337, respectively. The final difference Fourier map was featureless.

### Summary

**Crystal Data** for  $C_{16}H_{34}FNO_4SSi$  ( $M = 383.59$  g/mol): triclinic, space group P-1 (no. 2),  $a = 14.494(5)$  Å,  $b = 15.866(5)$  Å,  $c = 18.793(9)$  Å,  $\alpha = 96.478(14)^\circ$ ,  $\beta = 90.043(10)^\circ$ ,  $\gamma = 90.052(18)^\circ$ ,  $V = 4294(3)$  Å<sup>3</sup>,  $Z = 8$ ,  $T = 100.01$  K,  $\mu(\text{MoK}\alpha) = 0.233$  mm<sup>-1</sup>,  $D_{\text{calc}} = 1.187$  g/cm<sup>3</sup>, 60494 reflections measured ( $2.18^\circ \leq 2\Theta \leq 53.212^\circ$ ), 17804 unique ( $R_{\text{int}} = 0.0584$ ,  $R_{\text{sigma}} = 0.0680$ ) which were used in all calculations. The final  $R_1$  was 0.0498 ( $I > 2\sigma(I)$ ) and  $wR_2$  was 0.1337 (all data).

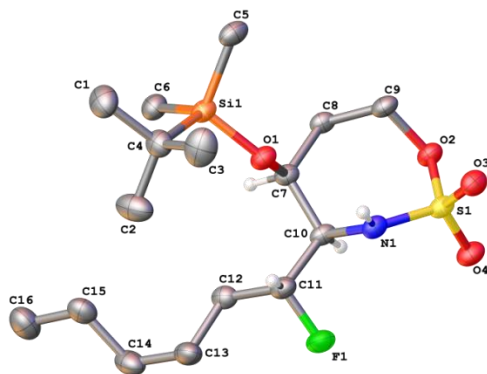

**Figure S-1.** A molecular drawing of the Si1 diastereomer in **7a** shown with 50% probability ellipsoids. Among the H atoms, only H atoms on the chiral C atoms and N atom are shown.

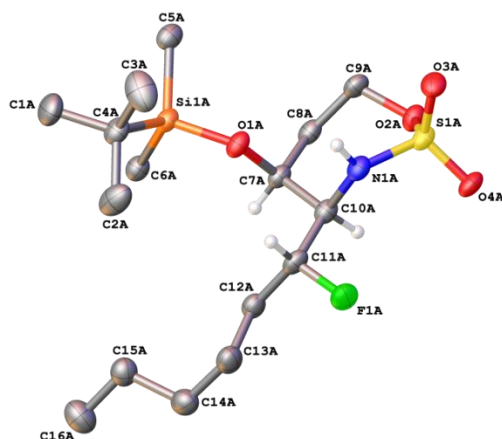

**Figure S-2.** A molecular drawing of the Si1a diastereomer in **7a** shown with 50% probability ellipsoids. Among the H atoms, only H atoms on the chiral C atoms and N atom are shown.

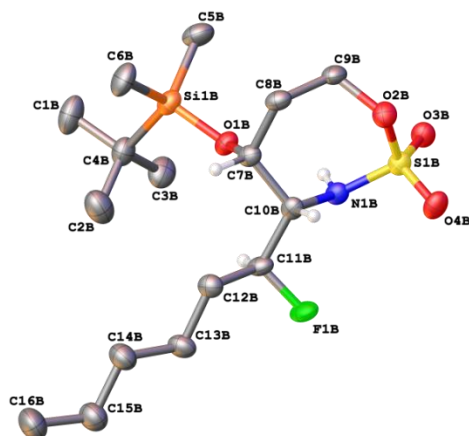

**Figure S-3.** A molecular drawing of the Si1b diastereomer in **7a** shown with 50% probability ellipsoids. Among the H atoms, only H atoms on the chiral C atoms and N atom are shown.

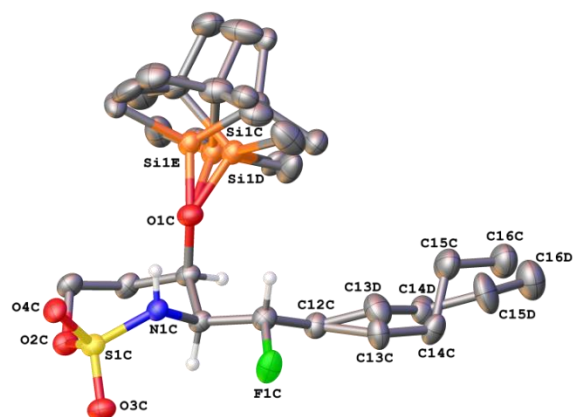

**Figure S-4.** A molecular drawing of the Si1c/d/e diastereomer in **7a** shown with 50% probability ellipsoids. All positions of the disordered atoms in the SiMe<sub>2</sub><sup>t</sup>Bu group and n-Bu fragments are shown. Among the H atoms, only H atoms on the chiral C atoms and N atom are shown.

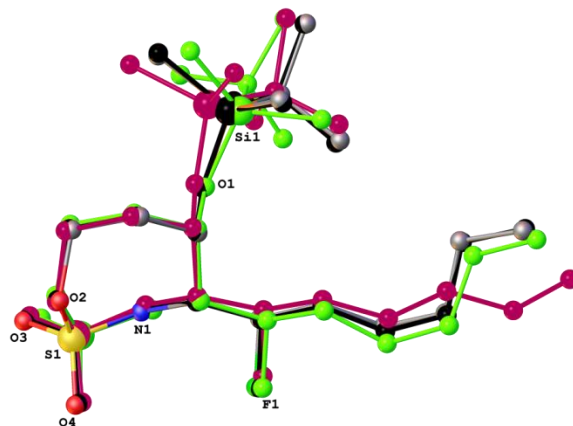

**Figure S-5.** A molecular drawing showing all diastereomers in **7a** superimposed. For the Si1c/d/e molecule only the major disorder component, Si1a was chosen. Note that molecules Si1b and Si1c/d/e had to be inverted due to their opposite absolute configuration. All H atoms are omitted.



**Table S-1. Crystal data and structure refinement for 7a.**

|                                             |                                                                |
|---------------------------------------------|----------------------------------------------------------------|
| Identification code                         | <b>7a</b>                                                      |
| Empirical formula                           | C <sub>16</sub> H <sub>34</sub> FNO <sub>4</sub> SSi           |
| Formula weight                              | 383.59                                                         |
| Temperature/K                               | 100.01                                                         |
| Crystal system                              | triclinic                                                      |
| Space group                                 | P $\bar{1}$                                                    |
| a/Å                                         | 14.494(5)                                                      |
| b/Å                                         | 15.866(5)                                                      |
| c/Å                                         | 18.793(9)                                                      |
| $\alpha$ /°                                 | 96.478(14)                                                     |
| $\beta$ /°                                  | 90.043(10)                                                     |
| $\gamma$ /°                                 | 90.052(18)                                                     |
| Volume/Å <sup>3</sup>                       | 4294(3)                                                        |
| Z                                           | 8                                                              |
| $\rho_{\text{calc}}$ /g/cm <sup>3</sup>     | 1.187                                                          |
| $\mu$ /mm <sup>-1</sup>                     | 0.233                                                          |
| F(000)                                      | 1664.0                                                         |
| Crystal size/mm <sup>3</sup>                | 0.4 × 0.3 × 0.2                                                |
| Radiation                                   | MoK $\alpha$ ( $\lambda$ = 0.71073)                            |
| 2 $\Theta$ range for data collection/°      | 2.18 to 53.212                                                 |
| Index ranges                                | -18 ≤ h ≤ 18, -19 ≤ k ≤ 19, -23 ≤ l ≤ 23                       |
| Reflections collected                       | 60494                                                          |
| Independent reflections                     | 17804 [R <sub>int</sub> = 0.0584, R <sub>sigma</sub> = 0.0680] |
| Data/restraints/parameters                  | 17804/278/1061                                                 |
| Goodness-of-fit on F <sup>2</sup>           | 1.090                                                          |
| Final R indexes [ $I \geq 2\sigma(I)$ ]     | R <sub>1</sub> = 0.0498, wR <sub>2</sub> = 0.1246              |
| Final R indexes [all data]                  | R <sub>1</sub> = 0.0690, wR <sub>2</sub> = 0.1337              |
| Largest diff. peak/hole / e Å <sup>-3</sup> | 0.47/-0.65                                                     |

**Table S-2. Fractional Atomic Coordinates ( $\times 10^4$ ) and Equivalent Isotropic Displacement Parameters (Å<sup>2</sup> $\times 10^3$ ) for 7a. U<sub>eq</sub> is defined as 1/3 of the trace of the orthogonalised U<sub>ij</sub> tensor.**

| Atom | x          | y          | z          | U(eq)     |
|------|------------|------------|------------|-----------|
| S1   | 10315.4(6) | 5623.0(6)  | 6427.4(4)  | 26.15(19) |
| Si1  | 7780.2(7)  | 2955.5(6)  | 6571.4(5)  | 27.2(2)   |
| O1   | 8715.6(16) | 3524.6(14) | 6428.2(11) | 27.5(5)   |
| C1   | 7338(3)    | 1479(3)    | 7177(2)    | 46.5(11)  |
| C2   | 8834(3)    | 1468(3)    | 6546(2)    | 51.6(12)  |
| C3   | 8667(4)    | 2335(3)    | 7734(2)    | 54.9(12)  |

|      |             |            |             |           |
|------|-------------|------------|-------------|-----------|
| C4   | 8179(3)     | 2022(2)    | 7030.7(19)  | 35.4(9)   |
| C5   | 6991(2)     | 3622(2)    | 7157.3(18)  | 34.2(9)   |
| C6   | 7201(3)     | 2593(2)    | 5697.8(18)  | 33.6(8)   |
| C7   | 8877(2)     | 3937(2)    | 5798.5(16)  | 24.7(7)   |
| F1   | 11377.8(14) | 3499.9(13) | 5522.3(12)  | 39.2(5)   |
| O2   | 9386.5(16)  | 5883.2(15) | 6079.7(12)  | 27.4(5)   |
| O3   | 10364.0(17) | 5960.7(15) | 7165.8(12)  | 31.0(5)   |
| O4   | 10989.2(17) | 5887.6(16) | 5949.0(13)  | 32.4(6)   |
| N1   | 10264(2)    | 4617.9(18) | 6396.5(14)  | 25.5(6)   |
| C8   | 8291(2)     | 4730(2)    | 5777.4(17)  | 24.8(7)   |
| C9   | 8535(2)     | 5488(2)    | 6308.7(18)  | 28.3(8)   |
| C10  | 9915(2)     | 4081(2)    | 5757.7(17)  | 24.9(7)   |
| C11  | 10460(2)    | 3264(2)    | 5674.0(19)  | 30.0(8)   |
| C12  | 10122(2)    | 2608(2)    | 5093.1(18)  | 29.3(8)   |
| C13  | 10722(3)    | 1823(2)    | 4983(2)     | 39.2(9)   |
| C14  | 10371(3)    | 1189(2)    | 4370(2)     | 43(1)     |
| C15  | 9407(3)     | 824(2)     | 4461(2)     | 37.4(9)   |
| C16  | 9101(3)     | 183(3)     | 3834(2)     | 53.5(12)  |
| S1A  | 10378.3(6)  | 4552.6(6)  | 8604.5(4)   | 26.60(19) |
| Si1A | 7732.0(7)   | 7078.5(6)  | 8425.8(5)   | 25.8(2)   |
| F1A  | 11297.9(14) | 6699.1(13) | 9620.2(11)  | 38.4(5)   |
| O1A  | 8681.7(16)  | 6546.0(15) | 8591.2(12)  | 27.1(5)   |
| O2A  | 9450.1(16)  | 4214.4(15) | 8900.8(12)  | 29.5(6)   |
| O3A  | 10479.8(18) | 4243.1(15) | 7869.9(12)  | 32.8(6)   |
| O4A  | 11041.7(17) | 4321.0(16) | 9110.2(13)  | 30.9(6)   |
| N1A  | 10268(2)    | 5557.9(18) | 8655.6(15)  | 27.2(6)   |
| C1A  | 7279(3)     | 8539(3)    | 7795(2)     | 45.5(10)  |
| C2A  | 8788(3)     | 8584(3)    | 8447(2)     | 49.8(11)  |
| C3A  | 8594(4)     | 7713(3)    | 7258(2)     | 57.0(13)  |
| C4A  | 8116(3)     | 8016(2)    | 7965.8(18)  | 31.6(8)   |
| C5A  | 6938(3)     | 6385(2)    | 7836.7(18)  | 32.0(8)   |
| C6A  | 7151(2)     | 7441(2)    | 9286.1(18)  | 30.3(8)   |
| C7A  | 8827(2)     | 6125(2)    | 9214.0(18)  | 25.6(7)   |
| C8A  | 8291(3)     | 5285(2)    | 9179.1(18)  | 28.1(8)   |
| C9A  | 8591(2)     | 4566(2)    | 8652.5(19)  | 29.1(8)   |
| C10A | 9879(2)     | 6032(2)    | 9293.2(18)  | 26.5(7)   |
| C11A | 10384(2)    | 6886(2)    | 9435.5(19)  | 29.3(8)   |
| C12A | 9986(3)     | 7491(2)    | 10028.7(19) | 30.8(8)   |
| C13A | 10557(3)    | 8293(2)    | 10213(2)    | 39.4(9)   |
| C14A | 10126(3)    | 8917(2)    | 10790(2)    | 39.4(9)   |
| C15A | 9221(3)     | 9299(2)    | 10579(2)    | 38.3(9)   |
| C16A | 8847(3)     | 9946(3)    | 11153(2)    | 51.0(11)  |

|      |            |            |            |           |
|------|------------|------------|------------|-----------|
| S1B  | 4938.4(6)  | 4500.5(5)  | 6301.7(4)  | 27.34(19) |
| Si1B | 3190.5(7)  | 7449.9(6)  | 7134.3(5)  | 31.6(2)   |
| F1B  | 6594.4(13) | 6347.3(14) | 5890.8(12) | 38.1(5)   |
| O1B  | 3955.6(16) | 6797.7(15) | 6740.7(12) | 27.7(5)   |
| O2B  | 4002.1(17) | 4429.7(15) | 5872.3(13) | 31.2(6)   |
| O3B  | 4825.6(17) | 4160.5(14) | 6966.4(12) | 30.7(5)   |
| O4B  | 5581.3(18) | 4119.4(16) | 5793.0(13) | 34.0(6)   |
| N1B  | 5155(2)    | 5491.2(18) | 6485.4(15) | 25.7(6)   |
| C1B  | 3202(3)    | 8952(3)    | 8066(2)    | 53.7(12)  |
| C2B  | 4436(3)    | 8830(3)    | 7143(2)    | 55.1(12)  |
| C3B  | 4533(3)    | 7998(3)    | 8183(2)    | 45.6(10)  |
| C4B  | 3872(3)    | 8345(2)    | 7650.7(19) | 36.9(8)   |
| C5B  | 2499(3)    | 6864(3)    | 7747(2)    | 44.7(10)  |
| C6B  | 2417(3)    | 7863(3)    | 6450(2)    | 44.9(10)  |
| C7B  | 4024(2)    | 6432(2)    | 6003.6(17) | 26.4(8)   |
| C8B  | 3261(2)    | 5780(2)    | 5794.8(18) | 28.6(8)   |
| C9B  | 3255(2)    | 4978(2)    | 6160.2(19) | 29.8(8)   |
| C10B | 4996(2)    | 6073(2)    | 5938.4(18) | 25.4(7)   |
| C11B | 5743(2)    | 6759(2)    | 6024.7(19) | 29.1(8)   |
| C12B | 5652(2)    | 7437(2)    | 5524.2(19) | 30.5(8)   |
| C13B | 6443(3)    | 8084(2)    | 5583(2)    | 35.9(9)   |
| C14B | 6211(3)    | 8867(2)    | 5227(2)    | 41.7(9)   |
| C15B | 6979(3)    | 9517(3)    | 5232(2)    | 47.3(10)  |
| C16B | 6698(4)    | 10309(3)   | 4904(3)    | 62.0(13)  |
| S1C  | 4824.4(6)  | 5550.1(5)  | 8691.7(4)  | 25.40(19) |
| Si1C | 3221.9(14) | 2314.6(12) | 8156.4(11) | 28.4(4)   |
| O1C  | 3895.0(17) | 3192.0(14) | 8348.7(12) | 31.5(6)   |
| C1C  | 2902(8)    | 1203(5)    | 6926(5)    | 66(3)     |
| C2C  | 3002(6)    | 2719(5)    | 6753(4)    | 47(2)     |
| C3C  | 4433(5)    | 1984(5)    | 7020(4)    | 48(2)     |
| C4C  | 3388(4)    | 2040(4)    | 7175(3)    | 45.3(16)  |
| C5C  | 3662(6)    | 1466(6)    | 8665(6)    | 45(3)     |
| C6C  | 1976(4)    | 2496(5)    | 8379(4)    | 45.5(18)  |
| C7C  | 4056(2)    | 3569(2)    | 9060.8(16) | 27.1(8)   |
| Si1E | 3161(4)    | 2577(4)    | 7883(4)    | 28.4(4)   |
| C1E  | 3160(15)   | 1015(11)   | 7030(14)   | 32(4)     |
| C2E  | 4360(17)   | 2038(15)   | 6755(10)   | 34(3)     |
| C3E  | 4513(15)   | 1305(13)   | 7859(11)   | 36(4)     |
| C4E  | 3835(9)    | 1693(7)    | 7363(7)    | 33(3)     |
| C5E  | 2364(11)   | 2134(11)   | 8510(9)    | 34(3)     |
| C6E  | 2484(12)   | 3185(11)   | 7257(8)    | 33(6)     |
| Si1D | 3651(2)    | 2193(2)    | 7990.3(18) | 28.4(4)   |

|      |            |            |            |          |
|------|------------|------------|------------|----------|
| C1D  | 2393(10)   | 1457(7)    | 6937(7)    | 53(3)    |
| C2D  | 1763(7)    | 2480(9)    | 7868(7)    | 63(3)    |
| C3D  | 2742(12)   | 3033(8)    | 6956(8)    | 58(4)    |
| C4D  | 2621(6)    | 2286(6)    | 7396(5)    | 46(2)    |
| C5D  | 4640(7)    | 1727(8)    | 7475(7)    | 58(3)    |
| C6D  | 3344(10)   | 1528(10)   | 8724(8)    | 34(3)    |
| F1C  | 6624.4(14) | 3847.0(13) | 9051.3(12) | 38.9(5)  |
| O2C  | 3913.1(17) | 5574.1(15) | 9143.3(12) | 28.6(5)  |
| O3C  | 5473.7(17) | 5985.9(15) | 9176.2(12) | 31.0(6)  |
| O4C  | 4646.5(18) | 5860.6(14) | 8021.6(12) | 29.0(5)  |
| N1C  | 5075(2)    | 4567.8(17) | 8518.8(14) | 23.3(6)  |
| C8C  | 3293(2)    | 4180(2)    | 9306.6(18) | 28.8(8)  |
| C9C  | 3182(3)    | 4957(2)    | 8914.7(19) | 30.2(8)  |
| C10C | 5021(2)    | 3991(2)    | 9078.3(18) | 23.2(7)  |
| C11C | 5801(2)    | 3364(2)    | 8959.3(19) | 28.9(8)  |
| C12C | 5836(3)    | 2679(2)    | 9455.5(19) | 30.7(8)  |
| C13C | 6739(5)    | 2180(4)    | 9389(5)    | 37.1(19) |
| C14C | 6756(4)    | 1380(4)    | 9763(4)    | 35.4(15) |
| C15C | 6173(4)    | 654(4)     | 9402(3)    | 47.8(17) |
| C16C | 6223(6)    | -147(4)    | 9773(4)    | 54.9(18) |
| C13D | 6484(16)   | 1979(12)   | 9237(14)   | 47(7)    |
| C14D | 6353(14)   | 1281(11)   | 9713(11)   | 37(5)    |
| C15D | 6980(13)   | 549(9)     | 9507(10)   | 57(6)    |
| C16D | 6754(19)   | -235(13)   | 9857(15)   | 65(6)    |

**Table S-3. Anisotropic Displacement Parameters ( $\text{\AA}^2 \times 10^3$ ) for 7a. The Anisotropic displacement factor exponent takes the form:  $-2\pi^2[h^2a^{*2}U_{11}+2hka^*b^*U_{12}+\dots]$ .**

| Atom | $U_{11}$ | $U_{22}$ | $U_{33}$ | $U_{23}$ | $U_{13}$ | $U_{12}$ |
|------|----------|----------|----------|----------|----------|----------|
| S1   | 22.4(4)  | 35.7(5)  | 21.9(4)  | 9.9(3)   | 0.3(3)   | -2.0(4)  |
| Si1  | 24.8(5)  | 34.4(5)  | 23.5(5)  | 9.0(4)   | 1.6(4)   | -2.7(4)  |
| O1   | 25.3(12) | 35.5(13) | 23.5(12) | 11.7(10) | -0.2(10) | -2.4(10) |
| C1   | 59(3)    | 40(2)    | 42(2)    | 13.8(19) | 9(2)     | -6(2)    |
| C2   | 59(3)    | 49(3)    | 52(3)    | 26(2)    | 20(2)    | 20(2)    |
| C3   | 68(3)    | 55(3)    | 47(3)    | 27(2)    | -15(2)   | -4(2)    |
| C4   | 42(2)    | 33(2)    | 33(2)    | 12.1(16) | 5.0(18)  | -0.1(17) |
| C5   | 25.7(19) | 51(2)    | 27.0(19) | 7.6(17)  | -1.2(15) | -4.9(17) |
| C6   | 33(2)    | 36(2)    | 33(2)    | 8.4(16)  | 2.0(17)  | -4.5(17) |
| C7   | 23.5(17) | 31.7(18) | 19.9(17) | 8.0(14)  | 2.2(14)  | 0.5(14)  |
| F1   | 24.6(11) | 43.0(12) | 50.9(13) | 9.6(10)  | 4.2(9)   | 2.1(9)   |
| O2   | 23.4(13) | 34.0(13) | 26.6(13) | 11.1(10) | -1.9(10) | -2.1(10) |
| O3   | 32.1(13) | 39.6(14) | 21.7(11) | 5.8(10)  | -1.3(10) | -2.8(11) |
| O4   | 28.2(13) | 43.2(14) | 27.7(13) | 12.2(11) | 3.8(10)  | -3.6(11) |

|      |          |          |          |          |          |          |
|------|----------|----------|----------|----------|----------|----------|
| N1   | 23.9(14) | 34.5(16) | 19.7(14) | 9.3(12)  | -1.7(12) | -2.1(12) |
| C8   | 21.2(17) | 33.9(18) | 20.6(16) | 9.2(14)  | -1.5(14) | 0.6(14)  |
| C9   | 20.7(18) | 38(2)    | 28.4(19) | 12.1(15) | 2.3(14)  | -1.3(15) |
| C10  | 20.6(17) | 35.8(19) | 19.9(16) | 10.4(14) | -0.7(13) | -0.3(14) |
| C11  | 25.2(18) | 33.6(18) | 33.0(19) | 11.7(15) | 4.4(15)  | 1.0(15)  |
| C12  | 30.0(19) | 30.9(18) | 29.2(18) | 12.1(14) | 4.3(15)  | 2.6(15)  |
| C13  | 32(2)    | 34(2)    | 52(2)    | 9.4(18)  | 9.1(18)  | 6.3(16)  |
| C14  | 48(2)    | 36(2)    | 46(2)    | 11.2(18) | 19(2)    | 9.5(18)  |
| C15  | 41(2)    | 35(2)    | 37(2)    | 8.9(16)  | 0.9(17)  | 11.1(17) |
| C16  | 61(3)    | 40(2)    | 59(3)    | 3(2)     | -1(2)    | 10(2)    |
| S1A  | 24.2(4)  | 36.8(5)  | 20.2(4)  | 9.4(3)   | 0.0(3)   | 3.4(4)   |
| Si1A | 23.4(5)  | 32.8(5)  | 22.9(5)  | 10.3(4)  | 0.2(4)   | 1.1(4)   |
| F1A  | 26.2(11) | 42.5(12) | 46.1(13) | 3.9(10)  | -5.2(9)  | -1.6(9)  |
| O1A  | 22.6(12) | 36.8(13) | 24.5(12) | 15(1)    | 1.9(10)  | 1.4(10)  |
| O2A  | 25.6(13) | 34.7(13) | 30.2(13) | 11.7(11) | 1.1(10)  | 2.5(10)  |
| O3A  | 41.5(15) | 38.9(13) | 18.5(11) | 5.4(10)  | 1.6(10)  | 6.6(11)  |
| O4A  | 25.1(13) | 44.1(15) | 25.2(12) | 10.8(11) | -4.9(10) | 4.9(11)  |
| N1A  | 28.0(15) | 34.0(15) | 21.5(14) | 11.0(12) | 1.2(12)  | 2.1(13)  |
| C1A  | 51(3)    | 42(2)    | 47(2)    | 18.3(19) | -6(2)    | 7(2)     |
| C2A  | 49(3)    | 49(3)    | 56(3)    | 28(2)    | -13(2)   | -16(2)   |
| C3A  | 80(4)    | 48(3)    | 47(3)    | 21(2)    | 30(3)    | 6(2)     |
| C4A  | 32(2)    | 38(2)    | 27.3(19) | 13.9(15) | 0.7(16)  | 0.2(16)  |
| C5A  | 27.8(19) | 43(2)    | 26.6(18) | 7.4(16)  | 1.8(15)  | 2.6(16)  |
| C6A  | 28.3(19) | 33.6(19) | 30.2(19) | 7.9(15)  | -0.7(15) | 1.4(16)  |
| C7A  | 21.0(17) | 32.9(18) | 23.9(17) | 8.2(14)  | -1.1(14) | 0.5(14)  |
| C8A  | 24.1(18) | 35.6(19) | 26.5(17) | 12.2(15) | -1.9(15) | 0.8(15)  |
| C9A  | 21.1(18) | 36(2)    | 30.8(19) | 7.8(16)  | -4.8(15) | -2.9(15) |
| C10A | 22.8(18) | 33.8(18) | 24.3(17) | 9.3(14)  | 1.3(14)  | 0.9(14)  |
| C11A | 20.1(17) | 38.8(19) | 30.8(18) | 12.0(15) | -4.2(14) | -3.2(15) |
| C12A | 26.2(18) | 32.2(19) | 34.8(19) | 7.1(15)  | -4.2(15) | -0.2(15) |
| C13A | 31(2)    | 39(2)    | 48(2)    | 5.3(18)  | -5.8(17) | 1.2(17)  |
| C14A | 45(2)    | 33(2)    | 40(2)    | 5.4(16)  | -5.8(18) | -4.2(17) |
| C15A | 34(2)    | 37(2)    | 44(2)    | 6.3(17)  | 0.6(17)  | -0.3(17) |
| C16A | 58(3)    | 41(2)    | 54(3)    | 2(2)     | 10(2)    | -1(2)    |
| S1B  | 30.2(5)  | 31.9(5)  | 20.9(4)  | 7.5(3)   | 0.0(4)   | 3.6(4)   |
| Si1B | 29.0(5)  | 38.0(5)  | 28.7(5)  | 8.4(4)   | -0.1(4)  | 9.1(4)   |
| F1B  | 19.3(10) | 50.3(13) | 47.9(13) | 18.6(10) | -0.3(9)  | 3.7(9)   |
| O1B  | 27.2(13) | 34.1(13) | 22.3(12) | 5.2(10)  | -0.2(10) | 7.1(10)  |
| O2B  | 34.2(14) | 33.0(13) | 26.4(13) | 3.9(11)  | -7.2(11) | 0.9(11)  |
| O3B  | 35.6(14) | 33.3(13) | 24.1(12) | 7.5(10)  | 1.7(10)  | 2.4(11)  |
| O4B  | 38.8(15) | 40.1(14) | 23.6(13) | 5.6(11)  | 5.3(11)  | 12.0(12) |
| N1B  | 26.7(16) | 32.4(15) | 19.3(14) | 8.4(12)  | 0.5(12)  | 2.4(13)  |

|      |          |          |          |          |          |          |
|------|----------|----------|----------|----------|----------|----------|
| C1B  | 68(3)    | 48(2)    | 43(2)    | -2.8(19) | -3(2)    | 26(2)    |
| C2B  | 70(3)    | 41(2)    | 54(3)    | 8(2)     | 6(2)     | -6(2)    |
| C3B  | 46(2)    | 42(2)    | 47(2)    | -4.8(18) | -11(2)   | 2.5(19)  |
| C4B  | 41(2)    | 35(2)    | 34.6(19) | 2.7(16)  | 0.7(16)  | 8.6(17)  |
| C5B  | 30(2)    | 61(3)    | 46(2)    | 13(2)    | 7.6(17)  | 4.1(19)  |
| C6B  | 46(2)    | 47(2)    | 41(2)    | 5.2(18)  | -5.9(18) | 21.5(19) |
| C7B  | 24.6(18) | 32.9(19) | 23.4(18) | 10.4(15) | -1.4(14) | 2.2(15)  |
| C8B  | 20.8(17) | 41(2)    | 25.1(17) | 8.6(15)  | 0.0(14)  | 1.0(15)  |
| C9B  | 19.8(17) | 35.4(19) | 34.4(19) | 4.7(15)  | 0.7(15)  | -1.8(15) |
| C10B | 28.7(18) | 30.3(18) | 18.6(16) | 8.6(13)  | 1.5(14)  | 2.6(15)  |
| C11B | 18.9(17) | 41(2)    | 29.5(19) | 11.5(16) | -1.0(14) | 0.4(15)  |
| C12B | 29.9(19) | 35.6(19) | 27.7(18) | 10.2(15) | -2.4(14) | -1.0(15) |
| C13B | 33(2)    | 41(2)    | 36(2)    | 14.8(17) | -1.1(16) | -7.0(16) |
| C14B | 41(2)    | 37(2)    | 48(2)    | 11.5(18) | -4.1(19) | -6.9(18) |
| C15B | 47(2)    | 42(2)    | 55(3)    | 14.9(19) | 0(2)     | -4.2(19) |
| C16B | 61(3)    | 39(2)    | 87(4)    | 16(2)    | 2(3)     | -6(2)    |
| S1C  | 28.4(5)  | 28.9(4)  | 20.0(4)  | 7.5(3)   | 0.9(3)   | -3.2(4)  |
| Si1C | 28.7(11) | 28.5(8)  | 29.3(10) | 8.7(7)   | -1.8(8)  | -1.5(8)  |
| O1C  | 35.7(14) | 32.1(13) | 26.6(13) | 3.7(10)  | -5.0(11) | -4.2(11) |
| C1C  | 96(8)    | 54(5)    | 45(5)    | -2(4)    | -8(5)    | -33(5)   |
| C2C  | 57(5)    | 56(5)    | 29(4)    | 9(3)     | -5(3)    | -11(4)   |
| C3C  | 57(4)    | 50(5)    | 35(4)    | -2(4)    | 1(3)     | -6(3)    |
| C4C  | 53(4)    | 50(4)    | 33(3)    | 6(3)     | -2(3)    | -15(3)   |
| C5C  | 42(6)    | 38(5)    | 58(5)    | 23(4)    | -12(4)   | -6(4)    |
| C6C  | 33(4)    | 37(4)    | 67(5)    | 5(4)     | 3(3)     | -3(3)    |
| C7C  | 29.7(19) | 29.4(18) | 23.3(17) | 7.6(14)  | -2.9(15) | -5.8(15) |
| Si1E | 28.7(11) | 28.5(8)  | 29.3(10) | 8.7(7)   | -1.8(8)  | -1.5(8)  |
| C1E  | 39(7)    | 30(6)    | 28(8)    | 10(5)    | -7(6)    | -1(5)    |
| C2E  | 42(6)    | 31(6)    | 30(5)    | 2(4)     | -1(5)    | -6(5)    |
| C3E  | 40(7)    | 36(8)    | 33(7)    | 5(6)     | -4(6)    | 4(6)     |
| C4E  | 36(5)    | 32(4)    | 32(5)    | 6(3)     | -3(4)    | 0(4)     |
| C5E  | 42(6)    | 31(6)    | 30(5)    | 2(4)     | -1(5)    | -6(5)    |
| C6E  | 43(10)   | 34(10)   | 22(8)    | 1(7)     | 2(7)     | 12(8)    |
| Si1D | 28.7(11) | 28.5(8)  | 29.3(10) | 8.7(7)   | -1.8(8)  | -1.5(8)  |
| C1D  | 55(7)    | 47(5)    | 55(6)    | 3(4)     | -22(5)   | -10(4)   |
| C2D  | 55(4)    | 60(7)    | 73(6)    | 1(5)     | -16(4)   | 0(4)     |
| C3D  | 64(8)    | 56(6)    | 58(7)    | 16(5)    | -39(5)   | -14(5)   |
| C4D  | 48(4)    | 41(4)    | 48(4)    | 6(3)     | -24(3)   | -5(3)    |
| C5D  | 48(5)    | 47(7)    | 77(7)    | -6(6)    | 17(5)    | -5(4)    |
| C6D  | 21(7)    | 41(7)    | 40(5)    | 15(5)    | -9(4)    | -8(5)    |
| F1C  | 25.7(11) | 43.4(12) | 51.6(13) | 22.4(10) | 4.3(10)  | -1.9(9)  |
| O2C  | 26.1(13) | 35.8(14) | 24.0(12) | 3.8(10)  | 4.6(10)  | -1.6(11) |

|      |          |          |          |          |          |          |
|------|----------|----------|----------|----------|----------|----------|
| O3C  | 32.4(14) | 36.0(13) | 25.3(12) | 6.2(10)  | -1.6(11) | -9.6(11) |
| O4C  | 37.3(14) | 32.0(12) | 19.2(11) | 8.9(9)   | -0.6(10) | 2.8(11)  |
| N1C  | 24.9(15) | 25.9(14) | 20.2(14) | 7.1(12)  | 0.3(12)  | -1.0(12) |
| C8C  | 20.7(17) | 38.1(19) | 29.4(18) | 11.6(15) | 1.6(14)  | -2.8(15) |
| C9C  | 23.2(17) | 37(2)    | 30.9(18) | 7.8(15)  | -1.1(15) | -4.3(16) |
| C10C | 23.0(17) | 27.5(17) | 20.3(16) | 8.1(13)  | 0.9(13)  | -3.7(14) |
| C11C | 29.0(19) | 33.4(19) | 25.2(18) | 7.8(15)  | 2.9(15)  | -1.3(15) |
| C12C | 32.6(19) | 33.5(19) | 27.1(18) | 8.1(15)  | 2.8(15)  | 2.1(15)  |
| C13C | 38(3)    | 30(3)    | 45(4)    | 12(3)    | 7(3)     | 7(3)     |
| C14C | 23(3)    | 43(3)    | 43(3)    | 19(2)    | 1(3)     | 2(2)     |
| C15C | 52(4)    | 42(3)    | 52(3)    | 16(3)    | -8(3)    | 3(3)     |
| C16C | 58(4)    | 43(3)    | 66(4)    | 16(3)    | -8(4)    | 3(3)     |
| C13D | 63(13)   | 38(7)    | 41(10)   | 4(7)     | 9(10)    | 9(8)     |
| C14D | 36(11)   | 41(7)    | 34(8)    | 1(6)     | 7(9)     | 10(7)    |
| C15D | 61(12)   | 37(7)    | 72(11)   | 9(7)     | 24(9)    | 19(7)    |
| C16D | 70(15)   | 46(8)    | 82(15)   | 16(8)    | 4(13)    | 9(9)     |

**Table S-4. Bond Lengths for 7a.**

| Atom | Atom | Length/Å | Atom | Atom | Length/Å |
|------|------|----------|------|------|----------|
| S1   | O2   | 1.572(2) | O1B  | C7B  | 1.444(4) |
| S1   | O3   | 1.432(2) | O2B  | C9B  | 1.456(4) |
| S1   | O4   | 1.423(3) | N1B  | C10B | 1.475(4) |
| S1   | N1   | 1.591(3) | C1B  | C4B  | 1.521(5) |
| Si1  | O1   | 1.667(2) | C2B  | C4B  | 1.527(5) |
| Si1  | C4   | 1.888(3) | C3B  | C4B  | 1.530(5) |
| Si1  | C5   | 1.839(4) | C7B  | C8B  | 1.533(5) |
| Si1  | C6   | 1.875(4) | C7B  | C10B | 1.521(5) |
| O1   | C7   | 1.434(3) | C8B  | C9B  | 1.513(5) |
| C1   | C4   | 1.534(5) | C10B | C11B | 1.529(5) |
| C2   | C4   | 1.525(5) | C11B | C12B | 1.513(5) |
| C3   | C4   | 1.531(5) | C12B | C13B | 1.534(5) |
| C7   | C8   | 1.523(4) | C13B | C14B | 1.512(5) |
| C7   | C10  | 1.524(5) | C14B | C15B | 1.516(5) |
| F1   | C11  | 1.419(4) | C15B | C16B | 1.517(5) |
| O2   | C9   | 1.471(4) | S1C  | O2C  | 1.569(3) |
| N1   | C10  | 1.481(4) | S1C  | O3C  | 1.431(3) |
| C8   | C9   | 1.515(5) | S1C  | O4C  | 1.426(2) |
| C10  | C11  | 1.511(5) | S1C  | N1C  | 1.598(3) |
| C11  | C12  | 1.503(5) | Si1C | O1C  | 1.704(3) |
| C12  | C13  | 1.515(5) | Si1C | C4C  | 1.862(5) |
| C13  | C14  | 1.529(6) | Si1C | C5C  | 1.851(6) |
| C14  | C15  | 1.529(6) | Si1C | C6C  | 1.870(6) |

|      |      |          |      |      |           |
|------|------|----------|------|------|-----------|
| C15  | C16  | 1.531(6) | O1C  | C7C  | 1.422(3)  |
| S1A  | O2A  | 1.573(3) | O1C  | Si1E | 1.629(4)  |
| S1A  | O3A  | 1.420(2) | O1C  | Si1D | 1.688(4)  |
| S1A  | O4A  | 1.429(2) | C1C  | C4C  | 1.528(7)  |
| S1A  | N1A  | 1.595(3) | C2C  | C4C  | 1.517(7)  |
| Si1A | O1A  | 1.663(2) | C3C  | C4C  | 1.544(8)  |
| Si1A | C4A  | 1.887(4) | C7C  | C8C  | 1.510(5)  |
| Si1A | C5A  | 1.866(4) | C7C  | C10C | 1.550(5)  |
| Si1A | C6A  | 1.857(4) | Si1E | C4E  | 1.890(5)  |
| F1A  | C11A | 1.409(4) | Si1E | C5E  | 1.845(6)  |
| O1A  | C7A  | 1.427(4) | Si1E | C6E  | 1.880(6)  |
| O2A  | C9A  | 1.462(4) | C1E  | C4E  | 1.534(7)  |
| N1A  | C10A | 1.456(4) | C2E  | C4E  | 1.525(7)  |
| C1A  | C4A  | 1.525(5) | C3E  | C4E  | 1.531(7)  |
| C2A  | C4A  | 1.546(5) | Si1D | C4D  | 1.880(7)  |
| C3A  | C4A  | 1.529(5) | Si1D | C5D  | 1.838(7)  |
| C7A  | C8A  | 1.538(5) | Si1D | C6D  | 1.882(8)  |
| C7A  | C10A | 1.540(5) | C1D  | C4D  | 1.525(8)  |
| C8A  | C9A  | 1.489(5) | C2D  | C4D  | 1.538(9)  |
| C10A | C11A | 1.537(5) | C3D  | C4D  | 1.530(9)  |
| C11A | C12A | 1.502(5) | F1C  | C11C | 1.418(4)  |
| C12A | C13A | 1.523(5) | O2C  | C9C  | 1.473(4)  |
| C13A | C14A | 1.519(5) | N1C  | C10C | 1.471(4)  |
| C14A | C15A | 1.517(5) | C8C  | C9C  | 1.514(5)  |
| C15A | C16A | 1.504(6) | C10C | C11C | 1.507(5)  |
| S1B  | O2B  | 1.576(3) | C11C | C12C | 1.510(5)  |
| S1B  | O3B  | 1.425(2) | C12C | C13C | 1.529(7)  |
| S1B  | O4B  | 1.421(3) | C12C | C13D | 1.479(15) |
| S1B  | N1B  | 1.601(3) | C13C | C14C | 1.520(6)  |
| Si1B | O1B  | 1.636(2) | C14C | C15C | 1.524(7)  |
| Si1B | C4B  | 1.903(4) | C15C | C16C | 1.519(8)  |
| Si1B | C5B  | 1.853(4) | C13D | C14D | 1.511(14) |
| Si1B | C6B  | 1.879(4) | C14D | C15D | 1.491(14) |
| F1B  | C11B | 1.406(4) | C15D | C16D | 1.508(14) |

**Table S-5. Bond Angles for 7a.**

| Atom | Atom | Atom | Angle/°    | Atom | Atom | Atom | Angle/°  |
|------|------|------|------------|------|------|------|----------|
| O2   | S1   | N1   | 104.78(14) | C1B  | C4B  | Si1B | 108.8(3) |
| O3   | S1   | O2   | 110.92(14) | C1B  | C4B  | C2B  | 109.2(3) |
| O3   | S1   | N1   | 107.55(14) | C1B  | C4B  | C3B  | 108.6(3) |
| O4   | S1   | O2   | 102.43(13) | C2B  | C4B  | Si1B | 111.0(3) |
| O4   | S1   | O3   | 118.34(16) | C2B  | C4B  | C3B  | 108.5(3) |



|     |      |     |            |      |      |      |            |
|-----|------|-----|------------|------|------|------|------------|
| O4  | Si1  | N1  | 111.97(16) | C3B  | C4B  | Si1B | 110.7(3)   |
| O1  | Si1  | C4  | 106.97(15) | O1B  | C7B  | C8B  | 112.5(3)   |
| O1  | Si1  | C5  | 108.50(15) | O1B  | C7B  | C10B | 104.4(3)   |
| O1  | Si1  | C6  | 109.88(14) | C10B | C7B  | C8B  | 114.3(3)   |
| C5  | Si1  | C4  | 110.21(17) | C9B  | C8B  | C7B  | 117.7(3)   |
| C5  | Si1  | C6  | 110.17(17) | O2B  | C9B  | C8B  | 109.0(3)   |
| C6  | Si1  | C4  | 111.02(17) | N1B  | C10B | C7B  | 110.3(3)   |
| C7  | O1   | Si1 | 124.9(2)   | N1B  | C10B | C11B | 108.0(3)   |
| C1  | C4   | Si1 | 108.9(3)   | C7B  | C10B | C11B | 113.1(3)   |
| C2  | C4   | Si1 | 110.3(2)   | F1B  | C11B | C10B | 107.0(3)   |
| C2  | C4   | C1  | 107.8(3)   | F1B  | C11B | C12B | 108.3(3)   |
| C2  | C4   | C3  | 109.7(4)   | C12B | C11B | C10B | 114.8(3)   |
| C3  | C4   | Si1 | 110.0(3)   | C11B | C12B | C13B | 114.1(3)   |
| C3  | C4   | C1  | 110.2(3)   | C14B | C13B | C12B | 112.2(3)   |
| O1  | C7   | C8  | 112.6(3)   | C13B | C14B | C15B | 115.3(3)   |
| O1  | C7   | C10 | 106.7(3)   | C14B | C15B | C16B | 113.3(4)   |
| C8  | C7   | C10 | 114.9(3)   | O2C  | S1C  | N1C  | 105.42(15) |
| C9  | O2   | S1  | 117.14(19) | O3C  | S1C  | O2C  | 103.20(14) |
| C10 | N1   | S1  | 121.9(2)   | O3C  | S1C  | N1C  | 111.68(15) |
| C9  | C8   | C7  | 116.7(3)   | O4C  | S1C  | O2C  | 109.63(15) |
| O2  | C9   | C8  | 109.6(3)   | O4C  | S1C  | O3C  | 119.34(15) |
| N1  | C10  | C7  | 111.8(3)   | O4C  | S1C  | N1C  | 106.72(14) |
| N1  | C10  | C11 | 108.3(3)   | O1C  | Si1C | C4C  | 103.3(2)   |
| C11 | C10  | C7  | 113.0(3)   | O1C  | Si1C | C5C  | 108.5(4)   |
| F1  | C11  | C10 | 105.6(3)   | O1C  | Si1C | C6C  | 113.8(3)   |
| F1  | C11  | C12 | 109.6(3)   | C4C  | Si1C | C6C  | 111.1(3)   |
| C12 | C11  | C10 | 114.9(3)   | C5C  | Si1C | C4C  | 111.3(4)   |
| C11 | C12  | C13 | 113.8(3)   | C5C  | Si1C | C6C  | 108.7(4)   |
| C12 | C13  | C14 | 111.9(3)   | C7C  | O1C  | Si1C | 122.6(2)   |
| C13 | C14  | C15 | 116.4(3)   | C7C  | O1C  | Si1E | 140.8(3)   |
| C14 | C15  | C16 | 113.8(3)   | C7C  | O1C  | Si1D | 133.3(2)   |
| O2A | S1A  | N1A | 105.74(15) | C1C  | C4C  | Si1C | 110.0(5)   |
| O3A | S1A  | O2A | 109.83(15) | C1C  | C4C  | C3C  | 111.3(6)   |
| O3A | S1A  | O4A | 119.33(15) | C2C  | C4C  | Si1C | 111.7(5)   |
| O3A | S1A  | N1A | 107.62(15) | C2C  | C4C  | C1C  | 108.3(6)   |
| O4A | S1A  | O2A | 102.49(14) | C2C  | C4C  | C3C  | 107.0(6)   |
| O4A | S1A  | N1A | 110.99(16) | C3C  | C4C  | Si1C | 108.5(4)   |
| O1A | Si1A | C4A | 106.54(15) | O1C  | C7C  | C8C  | 110.8(3)   |
| O1A | Si1A | C5A | 110.04(15) | O1C  | C7C  | C10C | 107.6(3)   |
| O1A | Si1A | C6A | 109.13(14) | C8C  | C7C  | C10C | 113.2(3)   |
| C5A | Si1A | C4A | 110.63(16) | O1C  | Si1E | C4E  | 107.7(4)   |
| C6A | Si1A | C4A | 110.49(17) | O1C  | Si1E | C5E  | 108.3(5)   |

|      |      |      |            |      |      |      |           |
|------|------|------|------------|------|------|------|-----------|
| C6A  | Si1A | C5A  | 109.95(17) | O1C  | Si1E | C6E  | 111.0(5)  |
| C7A  | O1A  | Si1A | 124.8(2)   | C5E  | Si1E | C4E  | 109.9(5)  |
| C9A  | O2A  | S1A  | 117.2(2)   | C5E  | Si1E | C6E  | 109.4(5)  |
| C10A | N1A  | S1A  | 120.6(2)   | C6E  | Si1E | C4E  | 110.5(5)  |
| C1A  | C4A  | Si1A | 109.7(3)   | C1E  | C4E  | Si1E | 109.1(6)  |
| C1A  | C4A  | C2A  | 109.1(3)   | C2E  | C4E  | Si1E | 109.7(6)  |
| C1A  | C4A  | C3A  | 107.7(3)   | C2E  | C4E  | C1E  | 107.8(7)  |
| C2A  | C4A  | Si1A | 110.8(2)   | C2E  | C4E  | C3E  | 109.8(7)  |
| C3A  | C4A  | Si1A | 110.2(3)   | C3E  | C4E  | Si1E | 110.1(6)  |
| C3A  | C4A  | C2A  | 109.2(4)   | C3E  | C4E  | C1E  | 110.3(7)  |
| O1A  | C7A  | C8A  | 112.0(3)   | O1C  | Si1D | C4D  | 105.6(3)  |
| O1A  | C7A  | C10A | 106.5(3)   | O1C  | Si1D | C5D  | 110.6(4)  |
| C8A  | C7A  | C10A | 114.3(3)   | O1C  | Si1D | C6D  | 109.6(6)  |
| C9A  | C8A  | C7A  | 118.4(3)   | C4D  | Si1D | C6D  | 109.6(5)  |
| O2A  | C9A  | C8A  | 109.2(3)   | C5D  | Si1D | C4D  | 111.1(5)  |
| N1A  | C10A | C7A  | 110.6(3)   | C5D  | Si1D | C6D  | 110.2(6)  |
| N1A  | C10A | C11A | 108.8(3)   | C1D  | C4D  | Si1D | 112.7(7)  |
| C11A | C10A | C7A  | 113.3(3)   | C1D  | C4D  | C2D  | 104.9(8)  |
| F1A  | C11A | C10A | 106.5(3)   | C1D  | C4D  | C3D  | 112.9(8)  |
| F1A  | C11A | C12A | 108.3(3)   | C2D  | C4D  | Si1D | 109.0(7)  |
| C12A | C11A | C10A | 115.0(3)   | C3D  | C4D  | Si1D | 110.3(7)  |
| C11A | C12A | C13A | 114.0(3)   | C3D  | C4D  | C2D  | 106.7(9)  |
| C14A | C13A | C12A | 113.5(3)   | C9C  | O2C  | S1C  | 118.2(2)  |
| C15A | C14A | C13A | 114.7(3)   | C10C | N1C  | S1C  | 120.9(2)  |
| C16A | C15A | C14A | 112.7(3)   | C7C  | C8C  | C9C  | 117.4(3)  |
| O2B  | S1B  | N1B  | 106.85(15) | O2C  | C9C  | C8C  | 109.4(3)  |
| O3B  | S1B  | O2B  | 109.74(15) | N1C  | C10C | C7C  | 109.6(3)  |
| O3B  | S1B  | N1B  | 107.03(15) | N1C  | C10C | C11C | 107.9(3)  |
| O4B  | S1B  | O2B  | 102.73(15) | C11C | C10C | C7C  | 113.4(3)  |
| O4B  | S1B  | O3B  | 119.39(15) | F1C  | C11C | C10C | 105.9(3)  |
| O4B  | S1B  | N1B  | 110.47(16) | F1C  | C11C | C12C | 108.3(3)  |
| O1B  | Si1B | C4B  | 106.06(15) | C10C | C11C | C12C | 116.3(3)  |
| O1B  | Si1B | C5B  | 108.17(16) | C11C | C12C | C13C | 112.3(4)  |
| O1B  | Si1B | C6B  | 110.31(15) | C13D | C12C | C11C | 114.9(9)  |
| C5B  | Si1B | C4B  | 111.16(18) | C14C | C13C | C12C | 115.3(5)  |
| C5B  | Si1B | C6B  | 109.92(19) | C13C | C14C | C15C | 114.4(5)  |
| C6B  | Si1B | C4B  | 111.12(18) | C16C | C15C | C14C | 113.5(5)  |
| C7B  | O1B  | Si1B | 130.3(2)   | C12C | C13D | C14D | 109.5(14) |
| C9B  | O2B  | S1B  | 116.5(2)   | C15D | C14D | C13D | 111.7(14) |
| C10B | N1B  | S1B  | 119.7(2)   | C14D | C15D | C16D | 114.3(16) |

**Table S-6. Hydrogen Bonds for 7a.**

| D   | H    | A   | d(D-H)/Å  | d(H-A)/Å  | d(D-A)/Å | D-H-A/° |
|-----|------|-----|-----------|-----------|----------|---------|
| N1  | H1   | O3A | 0.870(10) | 2.13(2)   | 2.914(4) | 149(4)  |
| N1A | H1AA | O3  | 0.879(10) | 2.098(16) | 2.944(4) | 162(4)  |
| N1B | H1BA | O4C | 0.880(10) | 2.109(13) | 2.974(4) | 167(4)  |
| N1C | H1C  | O3B | 0.878(10) | 2.114(18) | 2.938(4) | 156(3)  |

**Table S-7. Torsion Angles for 7a.**

| A   | B   | C   | D   | Angle/°   | A    | B    | C    | D    | Angle/°   |
|-----|-----|-----|-----|-----------|------|------|------|------|-----------|
| S1  | O2  | C9  | C8  | -96.4(3)  | O4B  | S1B  | O2B  | C9B  | -162.3(2) |
| S1  | N1  | C10 | C7  | -90.2(3)  | O4B  | S1B  | N1B  | C10B | 69.3(3)   |
| S1  | N1  | C10 | C11 | 144.7(2)  | N1B  | S1B  | O2B  | C9B  | -46.0(3)  |
| Si1 | O1  | C7  | C8  | 74.2(3)   | N1B  | C10B | C11B | F1B  | 62.7(3)   |
| Si1 | O1  | C7  | C10 | -158.8(2) | N1B  | C10B | C11B | C12B | -177.1(3) |
| O1  | Si1 | C4  | C1  | 179.8(2)  | C4B  | Si1B | O1B  | C7B  | -130.0(3) |
| O1  | Si1 | C4  | C2  | -62.2(3)  | C5B  | Si1B | O1B  | C7B  | 110.7(3)  |
| O1  | Si1 | C4  | C3  | 59.0(3)   | C6B  | Si1B | O1B  | C7B  | -9.5(3)   |
| O1  | C7  | C8  | C9  | 70.4(4)   | C7B  | C8B  | C9B  | O2B  | -73.7(4)  |
| O1  | C7  | C10 | N1  | -59.9(3)  | C7B  | C10B | C11B | F1B  | -175.0(3) |
| O1  | C7  | C10 | C11 | 62.6(4)   | C7B  | C10B | C11B | C12B | -54.8(4)  |
| C4  | Si1 | O1  | C7  | 141.5(3)  | C8B  | C7B  | C10B | N1B  | -68.8(4)  |
| C5  | Si1 | O1  | C7  | -99.6(3)  | C8B  | C7B  | C10B | C11B | 170.1(3)  |
| C5  | Si1 | C4  | C1  | 62.0(3)   | C10B | C7B  | C8B  | C9B  | 53.8(4)   |
| C5  | Si1 | C4  | C2  | -180.0(3) | C10B | C11B | C12B | C13B | -176.0(3) |
| C5  | Si1 | C4  | C3  | -58.8(3)  | C11B | C12B | C13B | C14B | -165.0(3) |
| C6  | Si1 | O1  | C7  | 20.9(3)   | C12B | C13B | C14B | C15B | -177.1(3) |
| C6  | Si1 | C4  | C1  | -60.4(3)  | C13B | C14B | C15B | C16B | -177.0(4) |
| C6  | Si1 | C4  | C2  | 57.7(3)   | S1C  | O2C  | C9C  | C8C  | 93.1(3)   |
| C6  | Si1 | C4  | C3  | 178.8(3)  | S1C  | N1C  | C10C | C7C  | 92.6(3)   |
| C7  | C8  | C9  | O2  | 74.1(3)   | S1C  | N1C  | C10C | C11C | -143.5(3) |
| C7  | C10 | C11 | F1  | 170.3(3)  | Si1C | O1C  | C7C  | C8C  | -85.3(3)  |
| C7  | C10 | C11 | C12 | 49.4(4)   | Si1C | O1C  | C7C  | C10C | 150.5(2)  |
| F1  | C11 | C12 | C13 | 56.9(4)   | O1C  | Si1C | C4C  | C1C  | 174.2(6)  |
| O2  | S1  | N1  | C10 | 42.0(3)   | O1C  | Si1C | C4C  | C2C  | -65.5(5)  |
| O3  | S1  | O2  | C9  | -70.3(3)  | O1C  | Si1C | C4C  | C3C  | 52.2(5)   |
| O3  | S1  | N1  | C10 | 160.1(2)  | O1C  | C7C  | C8C  | C9C  | -64.3(4)  |
| O4  | S1  | O2  | C9  | 162.5(2)  | O1C  | C7C  | C10C | N1C  | 53.3(3)   |
| O4  | S1  | N1  | C10 | -68.3(3)  | O1C  | C7C  | C10C | C11C | -67.3(3)  |
| N1  | S1  | O2  | C9  | 45.5(3)   | O1C  | Si1E | C4E  | C1E  | 169.6(11) |
| N1  | C10 | C11 | F1  | -65.3(3)  | O1C  | Si1E | C4E  | C2E  | -72.5(11) |
| N1  | C10 | C11 | C12 | 173.8(3)  | O1C  | Si1E | C4E  | C3E  | 48.5(11)  |
| C8  | C7  | C10 | N1  | 65.7(3)   | O1C  | Si1D | C4D  | C1D  | 171.1(8)  |

|      |      |      |      |           |      |      |      |      |           |
|------|------|------|------|-----------|------|------|------|------|-----------|
| C8   | C7   | C10  | C11  | -171.8(3) | O1C  | Si1D | C4D  | C2D  | -72.9(7)  |
| C10  | C7   | C8   | C9   | -52.1(4)  | O1C  | Si1D | C4D  | C3D  | 43.9(8)   |
| C10  | C11  | C12  | C13  | 175.7(3)  | C4C  | Si1C | O1C  | C7C  | -173.0(3) |
| C11  | C12  | C13  | C14  | -177.9(3) | C5C  | Si1C | O1C  | C7C  | -54.7(4)  |
| C12  | C13  | C14  | C15  | -62.0(4)  | C5C  | Si1C | C4C  | C1C  | 57.9(7)   |
| C13  | C14  | C15  | C16  | -179.1(3) | C5C  | Si1C | C4C  | C2C  | 178.2(6)  |
| S1A  | O2A  | C9A  | C8A  | -94.7(3)  | C5C  | Si1C | C4C  | C3C  | -64.1(6)  |
| S1A  | N1A  | C10A | C7A  | -91.5(3)  | C6C  | Si1C | O1C  | C7C  | 66.4(4)   |
| S1A  | N1A  | C10A | C11A | 143.5(2)  | C6C  | Si1C | C4C  | C1C  | -63.4(7)  |
| Si1A | O1A  | C7A  | C8A  | 76.1(3)   | C6C  | Si1C | C4C  | C2C  | 56.9(6)   |
| Si1A | O1A  | C7A  | C10A | -158.3(2) | C6C  | Si1C | C4C  | C3C  | 174.6(5)  |
| F1A  | C11A | C12A | C13A | 54.8(4)   | C7C  | O1C  | Si1E | C4E  | -128.5(6) |
| O1A  | Si1A | C4A  | C1A  | 180.0(3)  | C7C  | O1C  | Si1E | C5E  | -9.7(8)   |
| O1A  | Si1A | C4A  | C2A  | -59.4(3)  | C7C  | O1C  | Si1E | C6E  | 110.4(8)  |
| O1A  | Si1A | C4A  | C3A  | 61.6(3)   | C7C  | O1C  | Si1D | C4D  | 130.0(4)  |
| O1A  | C7A  | C8A  | C9A  | 69.5(4)   | C7C  | O1C  | Si1D | C5D  | -109.7(6) |
| O1A  | C7A  | C10A | N1A  | -58.3(4)  | C7C  | O1C  | Si1D | C6D  | 12.1(6)   |
| O1A  | C7A  | C10A | C11A | 64.1(4)   | C7C  | C8C  | C9C  | O2C  | -75.7(4)  |
| O2A  | S1A  | N1A  | C10A | 43.9(3)   | C7C  | C10C | C11C | F1C  | -175.3(3) |
| O3A  | S1A  | O2A  | C9A  | -70.9(3)  | C7C  | C10C | C11C | C12C | -55.0(4)  |
| O3A  | S1A  | N1A  | C10A | 161.2(3)  | Si1E | O1C  | C7C  | C8C  | -63.5(6)  |
| O4A  | S1A  | O2A  | C9A  | 161.3(2)  | Si1E | O1C  | C7C  | C10C | 172.3(5)  |
| O4A  | S1A  | N1A  | C10A | -66.5(3)  | C5E  | Si1E | C4E  | C1E  | 51.8(12)  |
| N1A  | S1A  | O2A  | C9A  | 45.0(3)   | C5E  | Si1E | C4E  | C2E  | 169.7(12) |
| N1A  | C10A | C11A | F1A  | -66.8(3)  | C5E  | Si1E | C4E  | C3E  | -69.3(12) |
| N1A  | C10A | C11A | C12A | 173.3(3)  | C6E  | Si1E | C4E  | C1E  | -69.0(12) |
| C4A  | Si1A | O1A  | C7A  | 143.8(3)  | C6E  | Si1E | C4E  | C2E  | 48.9(12)  |
| C5A  | Si1A | O1A  | C7A  | -96.2(3)  | C6E  | Si1E | C4E  | C3E  | 169.9(12) |
| C5A  | Si1A | C4A  | C1A  | 60.4(3)   | Si1D | O1C  | C7C  | C8C  | -113.2(3) |
| C5A  | Si1A | C4A  | C2A  | -179.0(3) | Si1D | O1C  | C7C  | C10C | 122.6(3)  |
| C5A  | Si1A | C4A  | C3A  | -58.0(3)  | C5D  | Si1D | C4D  | C1D  | 51.1(9)   |
| C6A  | Si1A | O1A  | C7A  | 24.5(3)   | C5D  | Si1D | C4D  | C2D  | 167.1(8)  |
| C6A  | Si1A | C4A  | C1A  | -61.6(3)  | C5D  | Si1D | C4D  | C3D  | -76.1(9)  |
| C6A  | Si1A | C4A  | C2A  | 59.0(3)   | C6D  | Si1D | C4D  | C1D  | -70.9(10) |
| C6A  | Si1A | C4A  | C3A  | 180.0(3)  | C6D  | Si1D | C4D  | C2D  | 45.0(9)   |
| C7A  | C8A  | C9A  | O2A  | 73.3(4)   | C6D  | Si1D | C4D  | C3D  | 161.8(10) |
| C7A  | C10A | C11A | F1A  | 169.8(3)  | F1C  | C11C | C12C | C13C | -50.2(5)  |
| C7A  | C10A | C11A | C12A | 49.8(4)   | F1C  | C11C | C12C | C13D | -72.8(13) |
| C8A  | C7A  | C10A | N1A  | 65.9(4)   | O2C  | S1C  | N1C  | C10C | -44.7(3)  |
| C8A  | C7A  | C10A | C11A | -171.7(3) | O3C  | S1C  | O2C  | C9C  | -160.2(2) |
| C10A | C7A  | C8A  | C9A  | -51.7(4)  | O3C  | S1C  | N1C  | C10C | 66.7(3)   |
| C10A | C11A | C12A | C13A | 173.8(3)  | O4C  | S1C  | O2C  | C9C  | 71.6(2)   |

|                    |           |                     |            |
|--------------------|-----------|---------------------|------------|
| C11AC12AC13AC14A   | 177.4(3)  | O4C S1C N1C C10C    | -161.2(3)  |
| C12AC13AC14AC15A   | -65.4(4)  | N1C S1C O2C C9C     | -42.9(3)   |
| C13AC14AC15AC16A   | -177.0(3) | N1C C10C C11C F1C   | 63.2(3)    |
| S1B O2B C9B C8B    | 94.6(3)   | N1C C10C C11C C12C  | -176.6(3)  |
| S1B N1B C10B C7B   | 91.0(3)   | C8C C7C C10C N1C    | -69.4(3)   |
| S1B N1B C10B C11B  | -145.0(3) | C8C C7C C10C C11C   | 169.9(3)   |
| Si1B O1B C7B C8B   | -69.6(4)  | C10C C7C C8C C9C    | 56.7(4)    |
| Si1B O1B C7B C10B  | 166.0(2)  | C10C C11C C12C C13C | -169.2(4)  |
| F1B C11B C12B C13B | -56.6(4)  | C10C C11C C12C C13D | 168.2(13)  |
| O1B C7B C8B C9B    | -65.0(4)  | C11C C12C C13C C14C | -169.0(5)  |
| O1B C7B C10B N1B   | 54.5(3)   | C11C C12C C13D C14D | -171.8(13) |
| O1B C7B C10B C11B  | -66.6(3)  | C12C C13C C14C C15C | 71.8(8)    |
| O2B S1B N1B C10B   | -41.7(3)  | C12C C13D C14D C15D | 179(2)     |
| O3B S1B O2B C9B    | 69.7(3)   | C13C C14C C15C C16C | 178.3(6)   |
| O3B S1B N1B C10B   | -159.2(2) | C13D C14D C15D C16D | -168(2)    |

**Table S-8. Hydrogen Atom Coordinates ( $\text{\AA}\times 10^4$ ) and Isotropic Displacement Parameters ( $\text{\AA}^2\times 10^3$ ) for 7a.**

| Atom | x         | y        | z        | U(eq) |
|------|-----------|----------|----------|-------|
| H1A  | 6879      | 1834     | 7452     | 70    |
| H1B  | 7531      | 1020     | 7452     | 70    |
| H1D  | 7067      | 1237     | 6721     | 70    |
| H2A  | 8515      | 1258     | 6101     | 77    |
| H2B  | 9036      | 987      | 6791     | 77    |
| H2C  | 9372      | 1804     | 6435     | 77    |
| H3A  | 9205      | 2677     | 7634     | 82    |
| H3B  | 8868      | 1847     | 7971     | 82    |
| H3C  | 8240      | 2681     | 8048     | 82    |
| H5A  | 7242      | 3701     | 7645     | 51    |
| H5B  | 6387      | 3346     | 7161     | 51    |
| H5C  | 6925      | 4176     | 6978     | 51    |
| H6A  | 6967      | 3087     | 5484     | 50    |
| H6B  | 6686      | 2216     | 5781     | 50    |
| H6C  | 7646      | 2288     | 5372     | 50    |
| H7   | 8700      | 3529     | 5376     | 30    |
| H1   | 10120(30) | 4420(20) | 6796(11) | 38    |
| H8A  | 8331      | 4906     | 5289     | 30    |
| H8B  | 7640      | 4577     | 5858     | 30    |
| H9A  | 8025      | 5905     | 6337     | 34    |
| H9B  | 8624      | 5303     | 6790     | 34    |
| H10  | 10039     | 4384     | 5329     | 30    |
| H11  | 10454     | 3015     | 6140     | 36    |

|                |          |          |    |
|----------------|----------|----------|----|
| H12E 10091     | 2866     | 4638     | 35 |
| H12F 9488      | 2437     | 5212     | 35 |
| H13E 10734     | 1548     | 5430     | 47 |
| H13F 11361     | 1991     | 4879     | 47 |
| H14E 10813     | 711      | 4301     | 52 |
| H14F 10374     | 1471     | 3926     | 52 |
| H15E 8958      | 1296     | 4518     | 45 |
| H15F 9395      | 543      | 4905     | 45 |
| H16G 9109      | 455      | 3391     | 80 |
| H16H 8475      | -13      | 3922     | 80 |
| H16I 9524      | -301     | 3788     | 80 |
| H1AA 10190(30) | 5750(20) | 8241(11) | 41 |
| H1AB 6861      | 8187     | 7477     | 68 |
| H1AC 7482      | 9027     | 7560     | 68 |
| H1AD 6956      | 8738     | 8240     | 68 |
| H2AA 8498      | 8751     | 8912     | 75 |
| H2AB 8935      | 9092     | 8217     | 75 |
| H2AC 9356      | 8269     | 8516     | 75 |
| H3AA 9127      | 7362     | 7350     | 86 |
| H3AB 8801      | 8205     | 7029     | 86 |
| H3AC 8160      | 7378     | 6941     | 86 |
| H5AA 7199      | 6286     | 7354     | 48 |
| H5AB 6337      | 6663     | 7816     | 48 |
| H5AC 6862      | 5841     | 8031     | 48 |
| H6AA 6999      | 6949     | 9536     | 46 |
| H6AB 6584      | 7745     | 9191     | 46 |
| H6AC 7564      | 7822     | 9585     | 46 |
| H7A 8599       | 6505     | 9638     | 31 |
| H8AA 8313      | 5090     | 9661     | 34 |
| H8AB 7637      | 5407     | 9078     | 34 |
| H9AA 8108      | 4122     | 8602     | 35 |
| H9AB 8689      | 4768     | 8178     | 35 |
| H10A 9997      | 5704     | 9708     | 32 |
| H11A 10391     | 7166     | 8985     | 35 |
| H12G 9928      | 7195     | 10463    | 37 |
| H12H 9359      | 7655     | 9889     | 37 |
| H13G 11176     | 8131     | 10376    | 47 |
| H13H 10640     | 8576     | 9774     | 47 |
| H14G 10021     | 8624     | 11221    | 47 |
| H14H 10570     | 9382     | 10922    | 47 |
| H15G 9314      | 9571     | 10135    | 46 |
| H15H 8761      | 8840     | 10475    | 46 |

|               |          |          |    |
|---------------|----------|----------|----|
| H16J 8259     | 10166    | 10995    | 77 |
| H16K 9289     | 10414    | 11246    | 77 |
| H16L 8750     | 9680     | 11593    | 77 |
| H1BA 4940(30) | 5650(20) | 6917(10) | 39 |
| H1BB 2800     | 9208     | 7730     | 81 |
| H1BC 3548     | 9399     | 8354     | 81 |
| H1BD 2825     | 8640     | 8381     | 81 |
| H2BA 4884     | 8446     | 6887     | 83 |
| H2BB 4762     | 9299     | 7420     | 83 |
| H2BC 4022     | 9055     | 6798     | 83 |
| H3BA 4177     | 7724     | 8536     | 68 |
| H3BB 4895     | 8465     | 8428     | 68 |
| H3BC 4948     | 7583     | 7925     | 68 |
| H5BA 2212     | 6370     | 7475     | 67 |
| H5BB 2019     | 7237     | 7973     | 67 |
| H5BC 2902     | 6676     | 8117     | 67 |
| H6BA 2793     | 8107     | 6092     | 67 |
| H6BB 2010     | 8301     | 6687     | 67 |
| H6BC 2044     | 7396     | 6215     | 67 |
| H7B 3972      | 6898     | 5689     | 32 |
| H8BA 2660     | 6066     | 5888     | 34 |
| H8BB 3302     | 5613     | 5272     | 34 |
| H9BA 3337     | 5121     | 6683     | 36 |
| H9BB 2656     | 4682     | 6076     | 36 |
| H10B 5064     | 5746     | 5454     | 30 |
| H11B 5736     | 7035     | 6530     | 35 |
| H12I 5063     | 7742     | 5626     | 37 |
| H12J 5623     | 7160     | 5026     | 37 |
| H13I 6583     | 8254     | 6095     | 43 |
| H13J 7002     | 7815     | 5357     | 43 |
| H14I 5667     | 9143     | 5471     | 50 |
| H14J 6035     | 8687     | 4724     | 50 |
| H15I 7513     | 9255     | 4963     | 57 |
| H15J 7180     | 9680     | 5732     | 57 |
| H16M 6486     | 10152    | 4411     | 93 |
| H16N 7228     | 10693    | 4902     | 93 |
| H16O 6198     | 10595    | 5187     | 93 |
| H1CA 3138     | 757      | 7198     | 98 |
| H1CB 3021     | 1048     | 6415     | 98 |
| H1CC 2237     | 1268     | 7006     | 98 |
| H2CA 2332     | 2755     | 6819     | 70 |
| H2CB 3141     | 2574     | 6243     | 70 |

|              |          |          |    |
|--------------|----------|----------|----|
| H2CC 3284    | 3267     | 6922     | 70 |
| H3CA 4734    | 2511     | 7222     | 72 |
| H3CB 4534    | 1900     | 6501     | 72 |
| H3CC 4696    | 1505     | 7238     | 72 |
| H5CA 4312    | 1356     | 8545     | 67 |
| H5CB 3302    | 947      | 8541     | 67 |
| H5CC 3606    | 1646     | 9180     | 67 |
| H6CA 1895    | 2548     | 8900     | 68 |
| H6CB 1610    | 2017     | 8157     | 68 |
| H6CC 1769    | 3019     | 8197     | 68 |
| H7C 4068     | 3108     | 9383     | 33 |
| H1EA 2532    | 1244     | 7054     | 48 |
| H1EB 3189    | 517      | 7294     | 48 |
| H1EC 3327    | 850      | 6528     | 48 |
| H2EA 4750    | 1589     | 6513     | 52 |
| H2EB 4747    | 2515     | 6950     | 52 |
| H2EC 3920    | 2230     | 6412     | 52 |
| H3EA 4172    | 1082     | 8247     | 55 |
| H3EB 4947    | 1741     | 8062     | 55 |
| H3EC 4853    | 843      | 7586     | 55 |
| H5EA 2679    | 2095     | 8966     | 52 |
| H5EB 2165    | 1567     | 8306     | 52 |
| H5EC 1824    | 2504     | 8590     | 52 |
| H6EA 1965    | 3473     | 7515     | 50 |
| H6EB 2249    | 2792     | 6858     | 50 |
| H6EC 2885    | 3607     | 7071     | 50 |
| H1DA 2888    | 1320     | 6588     | 79 |
| H1DB 1810    | 1518     | 6685     | 79 |
| H1DC 2337    | 1000     | 7244     | 79 |
| H2DA 1635    | 2000     | 8138     | 94 |
| H2DB 1232    | 2575     | 7563     | 94 |
| H2DC 1875    | 2990     | 8202     | 94 |
| H3DA 3056    | 3499     | 7247     | 87 |
| H3DB 2136    | 3224     | 6809     | 87 |
| H3DC 3113    | 2853     | 6530     | 87 |
| H5DA 4894    | 2144     | 7181     | 87 |
| H5DB 4436    | 1224     | 7163     | 87 |
| H5DC 5115    | 1565     | 7804     | 87 |
| H6DA 3873    | 1501     | 9045     | 50 |
| H6DB 3180    | 954      | 8514     | 50 |
| H6DC 2817    | 1783     | 8996     | 50 |
| H1C 4880(30) | 4340(20) | 8097(10) | 35 |



|           |      |       |    |
|-----------|------|-------|----|
| H8CA 3395 | 4375 | 9820  | 35 |
| H8CB 2703 | 3864 | 9270  | 35 |
| H9CA 3222 | 4792 | 8392  | 36 |
| H9CB 2569 | 5216 | 9022  | 36 |
| H10C 5108 | 4331 | 9555  | 28 |
| H11C 5773 | 3089 | 8454  | 35 |
| H12A 5313 | 2284 | 9345  | 37 |
| H12B 5764 | 2942 | 9956  | 37 |
| H12C 6011 | 2942 | 9940  | 37 |
| H12D 5209 | 2438 | 9489  | 37 |
| H13A 6869 | 2022 | 8874  | 44 |
| H13B 7244 | 2558 | 9585  | 44 |
| H14A 6535 | 1521 | 10261 | 43 |
| H14B 7403 | 1184 | 9788  | 43 |
| H15A 5522 | 842  | 9392  | 57 |
| H15B 6381 | 522  | 8901  | 57 |
| H16A 5860 | -596 | 9503  | 82 |
| H16B 5973 | -33  | 10259 | 82 |
| H16C 6867 | -329 | 9798  | 82 |
| H13C 7127 | 2191 | 9278  | 57 |
| H13D 6371 | 1755 | 8732  | 57 |
| H14C 6474 | 1509 | 10216 | 45 |
| H14D 5705 | 1083 | 9679  | 45 |
| H15C 7620 | 724  | 9633  | 68 |
| H15D 6953 | 406  | 8980  | 68 |
| H16D 6224 | -525 | 9615  | 98 |
| H16E 6604 | -74  | 10363 | 98 |
| H16F 7287 | -617 | 9822  | 98 |

**Table S-9. Atomic Occupancy for 7a.**

| <b>Atom Occupancy</b> | <b>Atom Occupancy</b> | <b>Atom Occupancy</b> |
|-----------------------|-----------------------|-----------------------|
| Si1C 0.559(2)         | C1C 0.559(2)          | H1CA 0.559(2)         |
| H1CB 0.559(2)         | H1CC 0.559(2)         | C2C 0.559(2)          |
| H2CA 0.559(2)         | H2CB 0.559(2)         | H2CC 0.559(2)         |
| C3C 0.559(2)          | H3CA 0.559(2)         | H3CB 0.559(2)         |
| H3CC 0.559(2)         | C4C 0.559(2)          | C5C 0.559(2)          |
| H5CA 0.559(2)         | H5CB 0.559(2)         | H5CC 0.559(2)         |
| C6C 0.559(2)          | H6CA 0.559(2)         | H6CB 0.559(2)         |
| H6CC 0.559(2)         | Si1E 0.1203(19)       | C1E 0.1203(19)        |
| H1EA 0.1203(19)       | H1EB 0.1203(19)       | H1EC 0.1203(19)       |
| C2E 0.1203(19)        | H2EA 0.1203(19)       | H2EB 0.1203(19)       |
| H2EC 0.1203(19)       | C3E 0.1203(19)        | H3EA 0.1203(19)       |

|                 |                 |                 |
|-----------------|-----------------|-----------------|
| H3EB 0.1203(19) | H3EC 0.1203(19) | C4E 0.1203(19)  |
| C5E 0.1203(19)  | H5EA 0.1203(19) | H5EB 0.1203(19) |
| H5EC 0.1203(19) | C6E 0.1203(19)  | H6EA 0.1203(19) |
| H6EB 0.1203(19) | H6EC 0.1203(19) | Si1D 0.3207(19) |
| C1D 0.3207(19)  | H1DA 0.3207(19) | H1DB 0.3207(19) |
| H1DC 0.3207(19) | C2D 0.3207(19)  | H2DA 0.3207(19) |
| H2DB 0.3207(19) | H2DC 0.3207(19) | C3D 0.3207(19)  |
| H3DA 0.3207(19) | H3DB 0.3207(19) | H3DC 0.3207(19) |
| C4D 0.3207(19)  | C5D 0.3207(19)  | H5DA 0.3207(19) |
| H5DB 0.3207(19) | H5DC 0.3207(19) | C6D 0.3207(19)  |
| H6DA 0.3207(19) | H6DB 0.3207(19) | H6DC 0.3207(19) |
| H12A 0.745(10)  | H12B 0.745(10)  | H12C 0.255(10)  |
| H12D 0.255(10)  | C13C 0.745(10)  | H13A 0.745(10)  |
| H13B 0.745(10)  | C14C 0.745(10)  | H14A 0.745(10)  |
| H14B 0.745(10)  | C15C 0.745(10)  | H15A 0.745(10)  |
| H15B 0.745(10)  | C16C 0.745(10)  | H16A 0.745(10)  |
| H16B 0.745(10)  | H16C 0.745(10)  | C13D 0.255(10)  |
| H13C 0.255(10)  | H13D 0.255(10)  | C14D 0.255(10)  |
| H14C 0.255(10)  | H14D 0.255(10)  | C15D 0.255(10)  |
| H15C 0.255(10)  | H15D 0.255(10)  | C16D 0.255(10)  |
| H16D 0.255(10)  | H16E 0.255(10)  | H16F 0.255(10)  |

### Crystallographic Experimental Section for 10a.

CCDC number 1548237

Data Collection. A colorless crystal with approximate dimensions 0.158 x 0.106 x 0.043 mm<sup>3</sup> was selected under oil under ambient conditions and attached to the tip of a MiTeGen MicroMount©. The crystal was mounted in a stream of cold nitrogen at 100(1) K and centered in the X-ray beam by using a video camera.

The crystal evaluation and data collection were performed on a Bruker Quazar SMART APEXII diffractometer with Mo K<sub>α</sub> (λ = 0.71073 Å) radiation and the diffractometer to crystal distance of 4.96 cm.<sup>1</sup>

The initial cell constants were obtained from three series of ω scans at different starting angles. Each series consisted of 12 frames collected at intervals of 0.5° in a 6° range about ω with the exposure time of 10 seconds per frame. The reflections were successfully indexed by an

automated indexing routine built in the APEX3 program suite. The final cell constants were calculated from a set of 6515 strong reflections from the actual data collection.

The data were collected by using the full sphere data collection routine to survey the reciprocal space to the extent of a full sphere to a resolution of 0.80 Å. A total of 45920 data were harvested by collecting 3 sets of frames with 0.5° scans in  $\omega$  with exposure times of 40 sec per frame. These highly redundant datasets were corrected for Lorentz and polarization effects. The absorption correction was based on fitting a function to the empirical transmission surface as sampled by multiple equivalent measurements.<sup>2</sup>

### Structure Solution and Refinement

The systematic absences in the diffraction data were uniquely consistent for the space group  $P2_1/c$  that yielded chemically reasonable and computationally stable results of refinement.<sup>3-8</sup>

A successful solution by the direct methods provided most non-hydrogen atoms from the *E*-map. The remaining non-hydrogen atoms were located in an alternating series of least-squares cycles and difference Fourier maps. All non-hydrogen atoms were refined with anisotropic displacement coefficients. All hydrogen atoms, except for the amine hydrogen, were included in the structure factor calculation at idealized positions and were allowed to ride on the neighboring atoms with relative isotropic displacement coefficients. The N1–H1 and N1A–H1A distances were constrained to 0.83 Å distance, but the isotropic displacement coefficients on the hydrogen atoms were allowed to refine freely.

Due to the presence of an inversion center, both stereoisomers are present in the crystal structure. There are two chiral molecules in the asymmetric unit. They have the same composition and connectivity, but opposite handedness. The relative configuration is as follows: chiral centers in the Si1 molecules are C3 – *R*, C10 – *S*, and C12 – *S*; the chiral centers on Si1A molecule are C3A – *S*, C10A – *R* and C12A – *R*.

The second molecule exhibited positional disorder in the fluorohexyl chain (atoms C13a–C17a and C13b–C17b) with the major component contribution of 70.4(4) %. These disordered atoms were refined isotropically.

The final least-squares refinement of 477 parameters against 9093 data resulted in residuals  $R$  (based on  $F^2$  for  $I \geq 2\sigma$ ) and  $wR$  (based on  $F^2$  for all data) of 0.0628 and 0.1701, respectively. The final difference Fourier map was featureless.

## Summary

**Crystal Data** for  $C_{17}H_{33}FN_2O_4SSi$  ( $M = 408.60$  g/mol): monoclinic, space group  $P2_1/c$  (no. 14),  $a = 13.110(4)$  Å,  $b = 9.969(4)$  Å,  $c = 33.818(12)$  Å,  $\beta = 90.959(14)^\circ$ ,  $V = 4419(3)$  Å<sup>3</sup>,  $Z = 8$ ,  $T = 100.0$  K,  $\mu(\text{MoK}\alpha) = 0.231$  mm<sup>-1</sup>,  $D_{\text{calc}} = 1.228$  g/cm<sup>3</sup>, 45819 reflections measured ( $2.408^\circ \leq 2\theta \leq 52.882^\circ$ ), 9093 unique ( $R_{\text{int}} = 0.0627$ ,  $R_{\text{sigma}} = 0.0802$ ) which were used in all calculations. The final  $R_1$  was 0.0628 ( $I > 2\sigma(I)$ ) and  $wR_2$  was 0.1701 (all data).

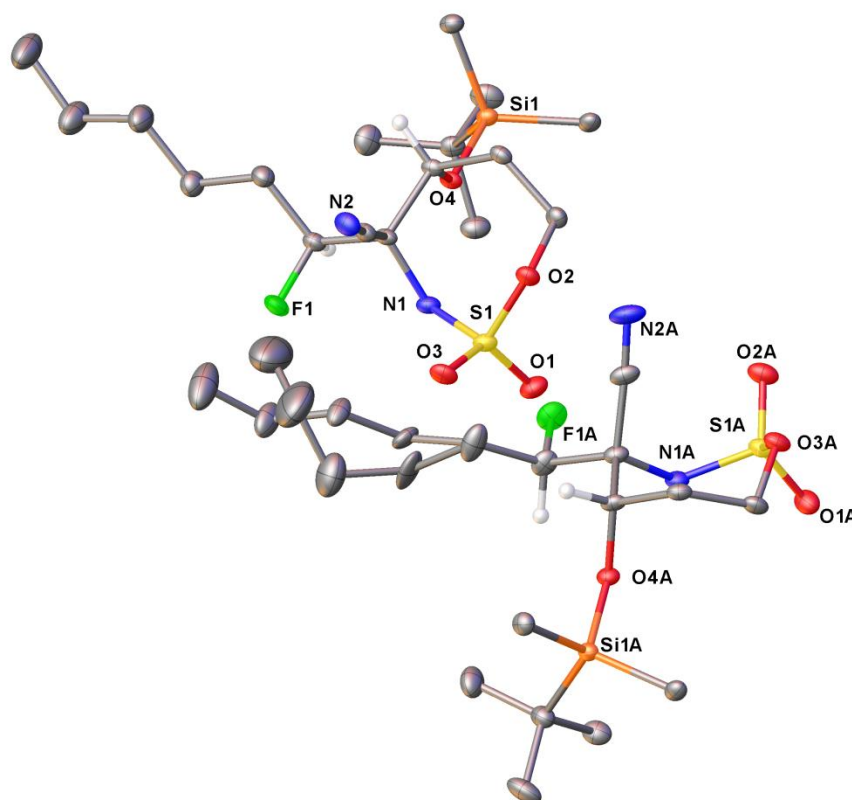

**Figure S-6.** A molecular drawing of **10a** shown with 50% probability ellipsoids showing the two molecules in the asymmetric unit. All H atoms on non-stereoactive atoms are omitted.

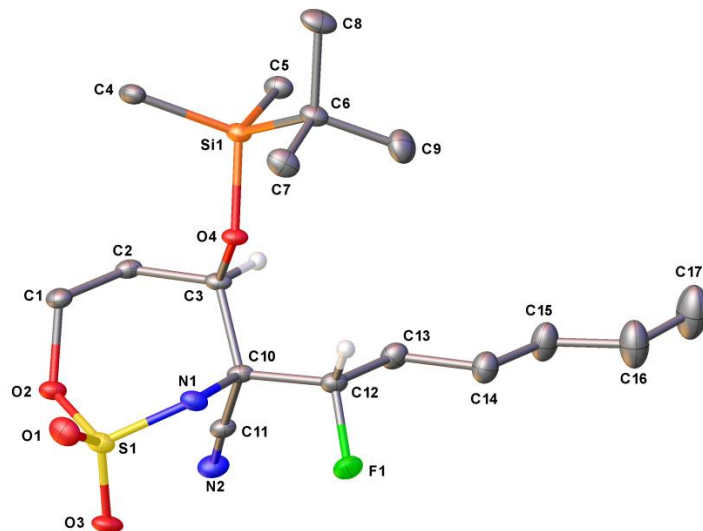

**Figure S-7.** A molecular drawing of **10a** shown with 50% probability ellipsoids showing the first molecule in the asymmetric unit. All H atoms on non-stereoactive atoms are omitted.

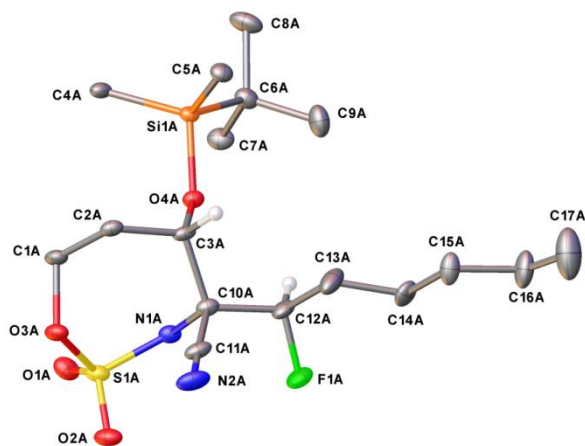

**Figure S-8.** A molecular drawing of **10a** shown with 50% probability ellipsoids showing the second molecule in the asymmetric unit. The minor disorder component and all H atoms on non-stereoactive atoms are omitted.

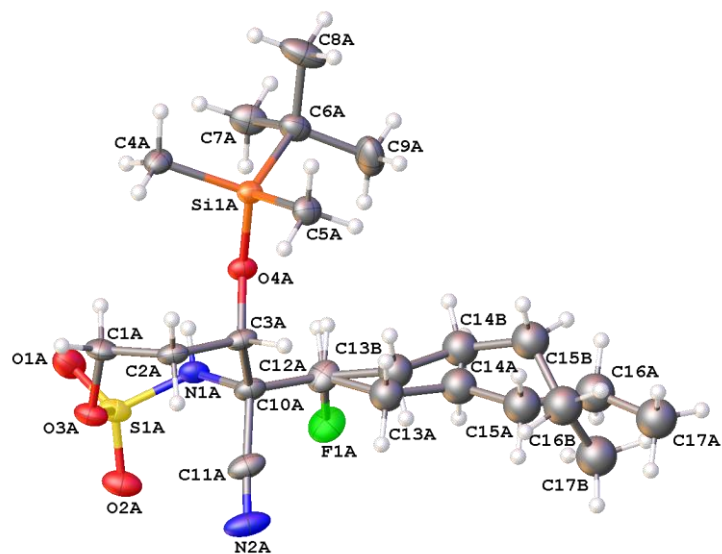

**Figure S-9.** A molecular drawing of **10a** shown with 50% probability ellipsoids showing the second molecule in the asymmetric unit. Both disorder components are shown.

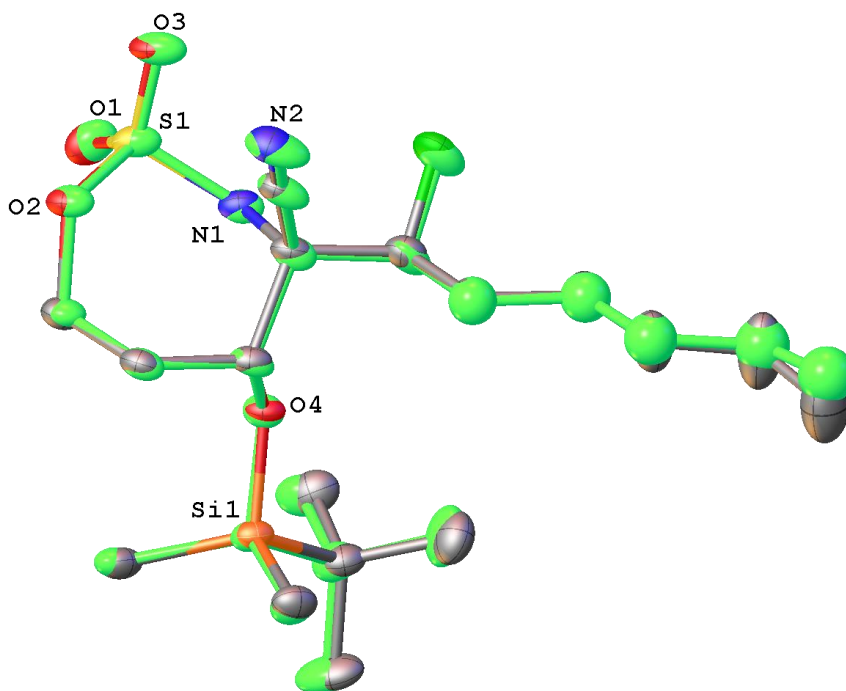

**Figure S-10.** A molecular drawing of **10a** shown with 50% probability ellipsoids showing the overlay of the two molecules in the asymmetric unit. The minor disorder component of Si1A molecule and all H atoms are omitted.

**Table S-10. Crystal data and structure refinement for 10a.**

|                                             |                                                                    |
|---------------------------------------------|--------------------------------------------------------------------|
| Identification code                         | Schomaker70b                                                       |
| Empirical formula                           | C <sub>17</sub> H <sub>33</sub> FN <sub>2</sub> O <sub>4</sub> SSi |
| Formula weight                              | 408.60                                                             |
| Temperature/K                               | 100.0                                                              |
| Crystal system                              | monoclinic                                                         |
| Space group                                 | P2 <sub>1</sub> /c                                                 |
| a/Å                                         | 13.110(4)                                                          |
| b/Å                                         | 9.969(4)                                                           |
| c/Å                                         | 33.818(12)                                                         |
| α/°                                         | 90                                                                 |
| β/°                                         | 90.959(14)                                                         |
| γ/°                                         | 90                                                                 |
| Volume/Å <sup>3</sup>                       | 4419(3)                                                            |
| Z                                           | 8                                                                  |
| ρ <sub>calc</sub> /g/cm <sup>3</sup>        | 1.228                                                              |
| μ/mm <sup>-1</sup>                          | 0.231                                                              |
| F(000)                                      | 1760.0                                                             |
| Crystal size/mm <sup>3</sup>                | 0.158 × 0.106 × 0.043                                              |
| Radiation                                   | MoKα (λ = 0.71073)                                                 |
| 2θ range for data collection/°              | 2.408 to 52.882                                                    |
| Index ranges                                | -16 ≤ h ≤ 15, -12 ≤ k ≤ 12, -42 ≤ l ≤ 42                           |
| Reflections collected                       | 45819                                                              |
| Independent reflections                     | 9093 [R <sub>int</sub> = 0.0627, R <sub>sigma</sub> = 0.0802]      |
| Data/restraints/parameters                  | 9093/29/477                                                        |
| Goodness-of-fit on F <sup>2</sup>           | 1.040                                                              |
| Final R indexes [I ≥ 2σ (I)]                | R <sub>1</sub> = 0.0628, wR <sub>2</sub> = 0.1538                  |
| Final R indexes [all data]                  | R <sub>1</sub> = 0.0933, wR <sub>2</sub> = 0.1701                  |
| Largest diff. peak/hole / e Å <sup>-3</sup> | 0.66/-0.88                                                         |

**Table S-11. Fractional Atomic Coordinates (×10<sup>4</sup>) and Equivalent Isotropic Displacement Parameters (Å<sup>2</sup>×10<sup>3</sup>) for 10a. U<sub>eq</sub> is defined as 1/3 of the trace of the orthogonalised U<sub>ij</sub> tensor.**

| Atom | x           | y           | z          | U(eq)      |
|------|-------------|-------------|------------|------------|
| S1   | 6457.4 (6)  | 5655.4 (7)  | 6976.5 (2) | 25.67 (19) |
| Si1  | 5799.3 (6)  | 10828.2 (8) | 6555.0 (3) | 22.7 (2)   |
| F1   | 4723.8 (14) | 5687.8 (18) | 5994.4 (5) | 35.8 (5)   |
| O1   | 7533.2 (16) | 5778 (2)    | 6959.5 (7) | 36.2 (6)   |
| O2   | 6030.8 (15) | 6402 (2)    | 7348.1 (6) | 26.7 (5)   |
| O3   | 5992.4 (17) | 4369 (2)    | 6987.8 (6) | 30.7 (5)   |
| O4   | 5657.1 (14) | 9161.9 (19) | 6543.8 (6) | 21.4 (4)   |

|      |              |            |             |            |
|------|--------------|------------|-------------|------------|
| N1   | 6017.0 (19)  | 6486 (2)   | 6594.0 (8)  | 23.9 (5)   |
| N2   | 3634 (2)     | 5461 (3)   | 6929.5 (8)  | 32.7 (6)   |
| C1   | 6094 (2)     | 7877 (3)   | 7354.6 (9)  | 27.2 (7)   |
| C2   | 5101 (2)     | 8462 (3)   | 7200.9 (9)  | 24.1 (6)   |
| C3   | 4912 (2)     | 8420 (3)   | 6755.2 (9)  | 21.6 (6)   |
| C4   | 6700 (2)     | 11260 (3)  | 6961.5 (10) | 29.3 (7)   |
| C5   | 4527 (2)     | 11611 (3)  | 6623.2 (10) | 29.9 (7)   |
| C6   | 6338 (2)     | 11241 (3)  | 6057.2 (10) | 29.6 (7)   |
| C7   | 7321 (3)     | 10438 (4)  | 5996.0 (11) | 38.1 (8)   |
| C8   | 6593 (3)     | 12745 (3)  | 6036.3 (11) | 42.6 (9)   |
| C9   | 5570 (3)     | 10899 (4)  | 5726.3 (10) | 44.6 (9)   |
| C10  | 4958 (2)     | 6992 (3)   | 6573.7 (9)  | 22.2 (6)   |
| C11  | 4243 (2)     | 6090 (3)   | 6778.0 (9)  | 24.3 (6)   |
| C12  | 4665 (2)     | 7014 (3)   | 6130.6 (9)  | 26.6 (7)   |
| C13  | 3610 (2)     | 7540 (3)   | 6034.8 (9)  | 32.4 (7)   |
| C14  | 3333 (3)     | 7513 (4)   | 5600.7 (10) | 39.3 (8)   |
| C15  | 2274 (3)     | 8022 (5)   | 5512 (1)    | 51.5 (10)  |
| C16  | 1969 (3)     | 8146 (6)   | 5095.5 (12) | 70.2 (14)  |
| C17  | 964 (4)      | 8755 (6)   | 5006.4 (14) | 78.5 (16)  |
| S1A  | 11435.6 (6)  | 8586.8 (7) | 6978.9 (2)  | 27.81 (19) |
| Si1A | 10802.1 (6)  | 3415.7 (8) | 6555.0 (2)  | 21.99 (19) |
| F1A  | 9750.8 (15)  | 8561 (2)   | 5981.4 (6)  | 42.1 (5)   |
| O1A  | 12509.3 (17) | 8466 (2)   | 6971.7 (7)  | 36.6 (6)   |
| O2A  | 10971.3 (18) | 9863 (2)   | 6987.5 (7)  | 36.3 (6)   |
| O3A  | 10986.3 (16) | 7848 (2)   | 7346.7 (6)  | 29.0 (5)   |
| O4A  | 10660.0 (14) | 5092 (2)   | 6539.4 (6)  | 24.1 (5)   |
| N1A  | 11014.3 (18) | 7762 (3)   | 6594.3 (8)  | 24.8 (5)   |
| N2A  | 8623 (2)     | 8788 (3)   | 6907.6 (10) | 45.4 (8)   |
| C1A  | 11038 (2)    | 6369 (3)   | 7355.2 (10) | 28.3 (7)   |
| C2A  | 10061 (2)    | 5786 (3)   | 7190.3 (9)  | 25.0 (6)   |
| C3A  | 9901 (2)     | 5822 (3)   | 6742.8 (9)  | 24.0 (6)   |
| C4A  | 11667 (2)    | 2986 (3)   | 6972.7 (9)  | 28.3 (7)   |
| C5A  | 9525 (2)     | 2630 (3)   | 6605.5 (10) | 30.1 (7)   |
| C6A  | 11389 (2)    | 3009 (3)   | 6065.1 (10) | 33.0 (7)   |
| C7A  | 12399 (3)    | 3779 (3)   | 6026.8 (11) | 37.5 (8)   |
| C8A  | 11611 (3)    | 1500 (4)   | 6041.1 (12) | 50.2 (10)  |
| C9A  | 10671 (3)    | 3421 (5)   | 5725 (1)    | 49.3 (10)  |
| C10A | 9964 (2)     | 7252 (3)   | 6560.7 (9)  | 26.0 (7)   |
| C11A | 9231 (2)     | 8155 (3)   | 6759.4 (10) | 33.1 (8)   |
| C12A | 9699 (2)     | 7231 (3)   | 6113.8 (10) | 33.4 (8)   |
| C13B | 8786 (8)     | 6487 (13)  | 5936 (3)    | 43.4 (5)   |
| C14B | 8727 (8)     | 6431 (14)  | 5487 (3)    | 47.7 (6)   |



|      |           |           |             |          |
|------|-----------|-----------|-------------|----------|
| C15B | 7848 (7)  | 5656 (12) | 5314 (4)    | 52.0 (7) |
| C16B | 6801 (8)  | 6156 (13) | 5380 (4)    | 56.4 (7) |
| C17B | 6534 (11) | 7376 (13) | 5139 (4)    | 60.7 (8) |
| C13A | 8616 (4)  | 6762 (6)  | 6035.6 (15) | 43.4 (5) |
| C14A | 8333 (4)  | 6832 (6)  | 5597.6 (15) | 47.7 (6) |
| C15A | 7255 (4)  | 6396 (6)  | 5514.7 (16) | 52.0 (7) |
| C16A | 6954 (4)  | 6341 (7)  | 5084.3 (17) | 56.4 (7) |
| C17A | 5873 (4)  | 6057 (7)  | 5005.9 (19) | 60.7 (8) |

**Table S-12. Anisotropic Displacement Parameters ( $\text{\AA}^2 \times 10^3$ ) for 10a. The Anisotropic displacement factor exponent takes the form:  $-2\pi^2[h^2 a^{*2} U_{11} + 2hka^* b^* U_{12} + \dots]$ .**

| Atom | $U_{11}$  | $U_{22}$  | $U_{33}$  | $U_{23}$  | $U_{13}$  | $U_{12}$  |
|------|-----------|-----------|-----------|-----------|-----------|-----------|
| S1   | 24.7 (4)  | 19.2 (4)  | 33.4 (4)  | 1.9 (3)   | 6.4 (3)   | 2.2 (3)   |
| Si1  | 20.8 (4)  | 16.4 (4)  | 31.1 (5)  | 1.6 (3)   | 2.7 (3)   | 0.2 (3)   |
| F1   | 45.3 (11) | 27.7 (10) | 34.6 (11) | -11.4 (8) | 2.3 (9)   | 3.8 (8)   |
| O1   | 23.9 (11) | 37.1 (14) | 47.9 (14) | 7.2 (11)  | 4.7 (10)  | 3.6 (9)   |
| O2   | 31.9 (12) | 16.4 (11) | 31.9 (12) | -0.4 (9)  | 4.7 (9)   | -0.5 (8)  |
| O3   | 40.4 (13) | 13.8 (10) | 38.1 (13) | 2.3 (9)   | 9.8 (10)  | -1.4 (9)  |
| O4   | 23 (1)    | 13 (1)    | 28.6 (11) | -0.1 (8)  | 6.9 (8)   | -2.5 (8)  |
| N1   | 22.6 (13) | 18.1 (13) | 31.4 (14) | 2.0 (11)  | 8.8 (11)  | 0.8 (10)  |
| N2   | 31.3 (15) | 27.1 (14) | 40.0 (16) | -3.0 (12) | 8.7 (12)  | -7.9 (12) |
| C1   | 28.4 (16) | 19.8 (15) | 33.5 (17) | -2.3 (13) | 0.6 (13)  | -3.5 (12) |
| C2   | 27.1 (15) | 17.5 (14) | 27.9 (16) | -3.8 (12) | 6.5 (12)  | -2.6 (11) |
| C3   | 20.9 (14) | 14.0 (13) | 30.2 (16) | -0.1 (12) | 8.4 (12)  | -2.4 (11) |
| C4   | 27.5 (16) | 19.0 (15) | 41.2 (19) | 0.7 (13)  | -3.0 (13) | 2.1 (12)  |
| C5   | 24.6 (16) | 23.5 (16) | 41.5 (19) | -1.1 (14) | 2.1 (13)  | 2.8 (12)  |
| C6   | 30.9 (17) | 20.8 (16) | 37.2 (18) | 4.5 (14)  | 5.4 (13)  | -1.0 (12) |
| C7   | 36.1 (19) | 38 (2)    | 41 (2)    | 4.9 (16)  | 12.4 (15) | 4.1 (15)  |
| C8   | 52 (2)    | 26.2 (18) | 50 (2)    | 11.5 (16) | 17.7 (18) | -1.1 (15) |
| C9   | 48 (2)    | 53 (2)    | 32 (2)    | 10.7 (17) | 0.0 (16)  | -3.5 (18) |
| C10  | 21.2 (14) | 15.7 (14) | 30.0 (16) | -2.7 (12) | 6.7 (12)  | -1.0 (11) |
| C11  | 26.3 (15) | 18.3 (14) | 28.5 (16) | -4.3 (12) | 4.1 (12)  | -2.5 (12) |
| C12  | 29.0 (16) | 20.7 (15) | 30.2 (17) | -2.9 (13) | 5.7 (13)  | -0.6 (12) |
| C13  | 30.8 (17) | 32.5 (18) | 34.1 (18) | -8.6 (14) | 2.5 (14)  | 2.5 (13)  |
| C14  | 39.4 (19) | 47 (2)    | 31.8 (18) | -3.0 (16) | 0.0 (15)  | 0.4 (16)  |
| C15  | 45 (2)    | 74 (3)    | 36 (2)    | -9 (2)    | -4.1 (17) | 12 (2)    |
| C16  | 54 (3)    | 114 (4)   | 43 (2)    | -4 (3)    | -7 (2)    | 20 (3)    |
| C17  | 58 (3)    | 122 (5)   | 55 (3)    | -13 (3)   | -12 (2)   | 26 (3)    |
| S1A  | 29.6 (4)  | 19.2 (4)  | 35.0 (4)  | -1.5 (3)  | 11.1 (3)  | -1.1 (3)  |
| Si1A | 19.6 (4)  | 18.0 (4)  | 28.3 (4)  | -1.1 (3)  | 1.9 (3)   | -1.7 (3)  |

|      |           |           |           |            |           |           |
|------|-----------|-----------|-----------|------------|-----------|-----------|
| F1A  | 46.1 (12) | 33.2 (11) | 47.1 (12) | 18.9 (9)   | 1.8 (9)   | -2.7 (9)  |
| O1A  | 29.0 (12) | 37.5 (14) | 43.7 (14) | -8.1 (11)  | 8.9 (10)  | -6.9 (10) |
| O2A  | 45.1 (14) | 21.0 (12) | 43.2 (14) | 0.8 (10)   | 17.2 (11) | -0.3 (10) |
| O3A  | 38.2 (12) | 19.2 (11) | 30.1 (12) | -1.4 (9)   | 10.3 (9)  | 2.4 (9)   |
| O4A  | 20.5 (10) | 22.1 (11) | 29.8 (11) | 1.3 (9)    | 6.9 (8)   | 1.1 (8)   |
| N1A  | 21.8 (13) | 21.7 (13) | 31.2 (14) | 0.0 (11)   | 8.9 (11)  | 1.7 (10)  |
| N2A  | 36.6 (17) | 27.6 (16) | 73 (2)    | 13.1 (15)  | 19.8 (15) | 11.7 (13) |
| C1A  | 36.4 (17) | 15.5 (15) | 33.1 (17) | -0.2 (13)  | 6.4 (14)  | 3.7 (12)  |
| C2A  | 23.7 (15) | 19.7 (15) | 31.7 (17) | 4.0 (13)   | 8.5 (12)  | 4.6 (11)  |
| C3A  | 21.0 (15) | 16.4 (14) | 34.9 (17) | 6.8 (12)   | 7.0 (12)  | 3.1 (11)  |
| C4A  | 27.7 (16) | 17.2 (14) | 39.9 (18) | 1.2 (13)   | -3.2 (13) | -0.9 (12) |
| C5A  | 26.7 (16) | 26.3 (16) | 37.4 (18) | -0.8 (14)  | 1.3 (13)  | -5.8 (13) |
| C6A  | 30.7 (17) | 31.0 (18) | 37.7 (19) | -5.8 (15)  | 6.3 (14)  | -1.8 (14) |
| C7A  | 37.3 (19) | 33.1 (19) | 42 (2)    | 1.4 (16)   | 14.9 (15) | -3.7 (15) |
| C8A  | 63 (3)    | 29 (2)    | 60 (3)    | -15.1 (18) | 25 (2)    | -6.7 (17) |
| C9A  | 46 (2)    | 72 (3)    | 30 (2)    | -10.1 (19) | -1.1 (16) | -1.3 (19) |
| C10A | 22.2 (15) | 22.6 (15) | 33.5 (17) | 4.4 (13)   | 8.2 (12)  | 3.2 (12)  |
| C11A | 28.0 (17) | 24.2 (17) | 47 (2)    | 13.6 (15)  | 10.3 (15) | 5.1 (13)  |
| C12A | 36.2 (18) | 26.6 (17) | 37.5 (19) | 14.9 (14)  | 0.4 (14)  | -3.6 (14) |

**Table S-13. Bond Lengths for 10a.**

| Atom | Atom | Length/Å  | Atom | Atom | Length/Å  |
|------|------|-----------|------|------|-----------|
| S1   | O1   | 1.418 (2) | S1A  | N1A  | 1.628 (3) |
| S1   | O2   | 1.571 (2) | Si1A | O4A  | 1.682 (2) |
| S1   | O3   | 1.421 (2) | Si1A | C4A  | 1.847 (3) |
| S1   | N1   | 1.633 (3) | Si1A | C5A  | 1.859 (3) |
| Si1  | O4   | 1.672 (2) | Si1A | C6A  | 1.883 (3) |
| Si1  | C4   | 1.848 (3) | F1A  | C12A | 1.402 (3) |
| Si1  | C5   | 1.860 (3) | O3A  | C1A  | 1.476 (3) |
| Si1  | C6   | 1.882 (3) | O4A  | C3A  | 1.419 (3) |
| F1   | C12  | 1.403 (3) | N1A  | C10A | 1.470 (4) |
| O2   | C1   | 1.474 (3) | N2A  | C11A | 1.140 (4) |
| O4   | C3   | 1.427 (3) | C1A  | C2A  | 1.505 (4) |
| N1   | C10  | 1.477 (4) | C2A  | C3A  | 1.525 (4) |
| N2   | C11  | 1.143 (4) | C3A  | C10A | 1.556 (4) |
| C1   | C2   | 1.511 (4) | C6A  | C7A  | 1.538 (4) |
| C2   | C3   | 1.524 (4) | C6A  | C8A  | 1.535 (5) |
| C3   | C10  | 1.553 (4) | C6A  | C9A  | 1.530 (5) |
| C6   | C7   | 1.535 (4) | C10A | C11A | 1.485 (4) |
| C6   | C8   | 1.538 (4) | C10A | C12A | 1.545 (4) |

|     |     |           |           |           |
|-----|-----|-----------|-----------|-----------|
| C6  | C9  | 1.531 (5) | C12A C13B | 1.523 (7) |
| C10 | C11 | 1.479 (4) | C12A C13A | 1.515 (5) |
| C10 | C12 | 1.541 (4) | C13B C14B | 1.522 (8) |
| C12 | C13 | 1.509 (4) | C14B C15B | 1.499 (8) |
| C13 | C14 | 1.507 (4) | C15B C16B | 1.482 (9) |
| C14 | C15 | 1.504 (5) | C16B C17B | 1.502 (9) |
| C15 | C16 | 1.463 (5) | C13A C14A | 1.522 (6) |
| C16 | C17 | 1.478 (5) | C14A C15A | 1.501 (6) |
| S1A | O1A | 1.413 (2) | C15A C16A | 1.503 (6) |
| S1A | O2A | 1.411 (2) | C16A C17A | 1.465 (7) |
| S1A | O3A | 1.569 (2) |           |           |

**Table S-14. Bond Angles for 10a.**

| Atom | Atom | Atom | Angle/°     | Atom | Atom | Atom | Angle/°     |
|------|------|------|-------------|------|------|------|-------------|
| O1   | S1   | O2   | 111.05 (14) | O2A  | S1A  | O3A  | 103.85 (13) |
| O1   | S1   | O3   | 120.45 (14) | O2A  | S1A  | N1A  | 109.34 (15) |
| O1   | S1   | N1   | 105.23 (14) | O3A  | S1A  | N1A  | 105.63 (13) |
| O2   | S1   | N1   | 105.52 (12) | O4A  | Si1A | C4A  | 108.71 (12) |
| O3   | S1   | O2   | 104.32 (12) | O4A  | Si1A | C5A  | 108.78 (13) |
| O3   | S1   | N1   | 109.43 (14) | O4A  | Si1A | C6A  | 103.47 (13) |
| O4   | Si1  | C4   | 108.54 (12) | C4A  | Si1A | C5A  | 111.99 (15) |
| O4   | Si1  | C5   | 108.66 (13) | C4A  | Si1A | C6A  | 111.61 (15) |
| O4   | Si1  | C6   | 103.91 (12) | C5A  | Si1A | C6A  | 111.86 (15) |
| C4   | Si1  | C5   | 111.91 (15) | C1A  | O3A  | S1A  | 117.83 (18) |
| C4   | Si1  | C6   | 111.72 (15) | C3A  | O4A  | Si1A | 124.89 (17) |
| C5   | Si1  | C6   | 111.70 (15) | C10A | N1A  | S1A  | 122.8 (2)   |
| C1   | O2   | S1   | 117.65 (18) | O3A  | C1A  | C2A  | 109.9 (2)   |
| C3   | O4   | Si1  | 125.48 (17) | C1A  | C2A  | C3A  | 117.5 (2)   |
| C10  | N1   | S1   | 121.95 (19) | O4A  | C3A  | C2A  | 112.5 (2)   |
| O2   | C1   | C2   | 109.4 (2)   | O4A  | C3A  | C10A | 103.6 (2)   |
| C1   | C2   | C3   | 117.0 (2)   | C2A  | C3A  | C10A | 114.0 (3)   |
| O4   | C3   | C2   | 112.3 (2)   | C7A  | C6A  | Si1A | 109.4 (2)   |
| O4   | C3   | C10  | 104.2 (2)   | C8A  | C6A  | Si1A | 109.8 (2)   |
| C2   | C3   | C10  | 114.2 (2)   | C8A  | C6A  | C7A  | 108.7 (3)   |
| C7   | C6   | Si1  | 109.6 (2)   | C9A  | C6A  | Si1A | 110.4 (2)   |
| C7   | C6   | C8   | 108.6 (3)   | C9A  | C6A  | C7A  | 108.8 (3)   |
| C8   | C6   | Si1  | 109.9 (2)   | C9A  | C6A  | C8A  | 109.8 (3)   |
| C9   | C6   | Si1  | 110.7 (2)   | N1A  | C10A | C3A  | 110.0 (2)   |
| C9   | C6   | C7   | 109.2 (3)   | N1A  | C10A | C11A | 111.6 (3)   |
| C9   | C6   | C8   | 108.9 (3)   | N1A  | C10A | C12A | 106.0 (2)   |

|     |     |     |             |                |           |
|-----|-----|-----|-------------|----------------|-----------|
| N1  | C10 | C3  | 109.7 (2)   | C11AC10AC3A    | 109.7 (2) |
| N1  | C10 | C11 | 111.9 (2)   | C11AC10AC12A   | 108.3 (3) |
| N1  | C10 | C12 | 105.6 (2)   | C12AC10AC3A    | 111.2 (3) |
| C11 | C10 | C3  | 110.1 (2)   | N2A C11AC10A   | 175.7 (4) |
| C11 | C10 | C12 | 108.2 (2)   | F1A C12AC10A   | 106.7 (3) |
| C12 | C10 | C3  | 111.1 (2)   | F1A C12AC13B   | 112.1 (6) |
| N2  | C11 | C10 | 174.9 (3)   | F1A C12AC13A   | 106.7 (3) |
| F1  | C12 | C10 | 106.9 (2)   | C13B C12AC10A  | 123.7 (5) |
| F1  | C12 | C13 | 108.2 (2)   | C13AC12AC10A   | 111.7 (3) |
| C13 | C12 | C10 | 115.3 (2)   | C14B C13B C12A | 115.9 (7) |
| C14 | C13 | C12 | 114.1 (3)   | C15B C14B C13B | 115.7 (8) |
| C15 | C14 | C13 | 113.3 (3)   | C16B C15B C14B | 118.4 (9) |
| C16 | C15 | C14 | 117.2 (3)   | C15B C16B C17B | 113.5 (9) |
| C15 | C16 | C17 | 117.3 (4)   | C12AC13AC14A   | 111.6 (4) |
| O1A | S1A | O3A | 111.16 (14) | C15AC14AC13A   | 112.4 (4) |
| O1A | S1A | N1A | 105.54 (13) | C14AC15AC16A   | 115.0 (5) |
| O2A | S1A | O1A | 120.49 (14) | C17AC16AC15A   | 114.8 (5) |

**Table S-15. Torsion Angles for 10a.**

| A   | B   | C   | D   | Angle/°     | A    | B            | C        | D    | Angle/°     |
|-----|-----|-----|-----|-------------|------|--------------|----------|------|-------------|
| S1  | O2  | C1  | C2  | 94.8 (3)    | Si1A | O4A          | C3A      | C2A  | 67.7 (3)    |
| S1  | N1  | C10 | C3  | 89.2 (3)    | Si1A | O4A          | C3A      | C10A | —           |
| S1  | N1  | C10 | C11 | -33.3 (3)   | F1A  | C12AC13B     | C14B     |      | 168.63 (18) |
| S1  | N1  | C10 | C12 | -150.9 (2)  | F1A  | C12AC13AC14A |          |      | 57.5 (12)   |
| Si1 | O4  | C3  | C2  | -67.6 (3)   | O1A  | S1A          | O3A      | C1A  | 59.9 (5)    |
| Si1 | O4  | C3  | C10 | 168.25 (18) | O1A  | S1A          | N1A      | C10A | -68.8 (2)   |
| F1  | C12 | C13 | C14 | -58.7 (4)   | O2A  | S1A          | O3A      | C1A  | 158.9 (2)   |
| O1  | S1  | O2  | C1  | 68.1 (2)    | O2A  | S1A          | N1A      | C10A | 160.3 (2)   |
| O1  | S1  | N1  | C10 | -159.0 (2)  | O3A  | S1A          | N1A      | C10A | -70.1 (3)   |
| O2  | S1  | N1  | C10 | -41.5 (3)   | O3A  | C1A          | C2A      | C3A  | 41.1 (3)    |
| O2  | C1  | C2  | C3  | -76.1 (3)   | O4A  | Si1A         | C6A      | C7A  | 75.8 (3)    |
| O3  | S1  | O2  | C1  | -160.7 (2)  | O4A  | Si1A         | C6A      | C8A  | 58.4 (3)    |
| O3  | S1  | N1  | C10 | 70.3 (3)    | O4A  | Si1A         | C6A      | C9A  | 177.6 (2)   |
| O4  | Si1 | C6  | C7  | -56.2 (3)   | O4A  | C3A          | C10AN1A  |      | -61.3 (3)   |
| O4  | Si1 | C6  | C8  | -175.4 (2)  | O4A  | C3A          | C10AC11A |      | -54.6 (3)   |
| O4  | Si1 | C6  | C9  | 64.2 (3)    | O4A  | C3A          | C10AC12A |      | -177.7 (3)  |
| O4  | C3  | C10 | N1  | 54.2 (3)    | N1A  | S1A          | O3A      | C1A  | 62.5 (3)    |
| O4  | C3  | C10 | C11 | 177.8 (2)   | N1A  | C10AC12AF1A  |          |      | 45.2 (2)    |
| O4  | C3  | C10 | C12 | -62.2 (3)   | N1A  | C10AC12AC13B |          |      | -62.0 (3)   |

|     |     |      |      |            |      |      |      |      |            |
|-----|-----|------|------|------------|------|------|------|------|------------|
| N1  | S1  | O2   | C1   | -45.4 (2)  | N1A  | C10A | C12A | C13A | -178.2 (3) |
| N1  | C10 | C12  | F1   | 61.3 (3)   | C1A  | C2A  | C3A  | O4A  | 60.9 (3)   |
| N1  | C10 | C12  | C13  | -178.3 (2) | C1A  | C2A  | C3A  | C10A | -56.7 (3)  |
| C1  | C2  | C3   | O4   | -61.5 (3)  | C2A  | C3A  | C10A | N1A  | 68.1 (3)   |
| C1  | C2  | C3   | C10  | 56.9 (3)   | C2A  | C3A  | C10A | C11A | -55.0 (3)  |
| C2  | C3  | C10  | N1   | -68.7 (3)  | C2A  | C3A  | C10A | C12A | -174.8 (2) |
| C2  | C3  | C10  | C11  | 54.9 (3)   | C3A  | C10A | C12A | F1A  | 178.5 (2)  |
| C2  | C3  | C10  | C12  | 174.9 (2)  | C3A  | C10A | C12A | C13B | 46.2 (8)   |
| C3  | C10 | C12  | F1   | -179.7 (2) | C3A  | C10A | C12A | C13A | 62.2 (4)   |
| C3  | C10 | C12  | C13  | -59.4 (3)  | C4A  | Si1A | O4A  | C3A  | -89.3 (2)  |
| C4  | Si1 | O4   | C3   | 89.8 (2)   | C4A  | Si1A | C6A  | C7A  | -58.3 (3)  |
| C4  | Si1 | C6   | C7   | 60.6 (3)   | C4A  | Si1A | C6A  | C8A  | 60.9 (3)   |
| C4  | Si1 | C6   | C8   | -58.6 (3)  | C4A  | Si1A | C6A  | C9A  | -178.0 (2) |
| C4  | Si1 | C6   | C9   | -178.9 (2) | C5A  | Si1A | O4A  | C3A  | 32.9 (3)   |
| C5  | Si1 | O4   | C3   | -32.1 (3)  | C5A  | Si1A | C6A  | C7A  | 175.3 (2)  |
| C5  | Si1 | C6   | C7   | -173.2 (2) | C5A  | Si1A | C6A  | C8A  | -65.5 (3)  |
| C5  | Si1 | C6   | C8   | 67.6 (3)   | C5A  | Si1A | C6A  | C9A  | 55.6 (3)   |
| C5  | Si1 | C6   | C9   | -52.7 (3)  | C6A  | Si1A | O4A  | C3A  | 151.9 (2)  |
| C6  | Si1 | O4   | C3   | -151.1 (2) | C10A | C12A | C13B | C14B | -172.3 (8) |
| C10 | C12 | C13  | C14  | -178.4 (3) | C10A | C12A | C13A | C14A | 176.2 (4)  |
| C11 | C10 | C12  | F1   | -58.7 (3)  | C11A | C10A | C12A | F1A  | 57.8 (3)   |
| C11 | C10 | C12  | C13  | 61.6 (3)   | C11A | C10A | C12A | C13B | -74.5 (7)  |
| C12 | C13 | C14  | C15  | 179.2 (3)  | C11A | C10A | C12A | C13A | -58.4 (4)  |
| C13 | C14 | C15  | C16  | 174.7 (4)  | C12A | C13B | C14B | C15B | 177.8 (10) |
| C14 | C15 | C16  | C17  | -174.8 (5) | C12A | C13A | C14A | C15A | -178.9 (5) |
| S1A | O3A | C1A  | C2A  | -94.0 (3)  | C13B | C14B | C15B | C16B | 64.7 (16)  |
| S1A | N1A | C10A | C3A  | -88.6 (3)  | C14B | C15B | C16B | C17B | 73.8 (16)  |
| S1A | N1A | C10A | C11A | 33.4 (3)   | C13A | C14A | C15A | C16A | -175.5 (5) |
| S1A | N1A | C10A | C12A | 151.0 (2)  | C14A | C15A | C16A | C17A | -173.7 (6) |

**Table S-16. Hydrogen Atom Coordinates ( $\text{\AA} \times 10^4$ ) and Isotropic Displacement Parameters ( $\text{\AA}^2 \times 10^3$ ) for 10a.**

| Atom | <i>x</i>  | <i>y</i>  | <i>z</i>  | U(eq)   |
|------|-----------|-----------|-----------|---------|
| H1   | 6430 (20) | 7090 (30) | 6565 (10) | 35 (10) |
| H1B  | 6662.2    | 8180.17   | 7187.53   | 33      |
| H1C  | 6228.1    | 8191.02   | 7628.24   | 33      |
| H2A  | 5067.32   | 9410.35   | 7286.92   | 29      |
| H2B  | 4534.81   | 7980.87   | 7329.22   | 29      |
| H3   | 4224.03   | 8811.94   | 6695.6    | 26      |
| H4A  | 6385.4    | 11062.01  | 7215.88   | 44      |

|      |            |           |           |         |
|------|------------|-----------|-----------|---------|
| H4B  | 6866.46    | 12217.06  | 6948.39   | 44      |
| H4C  | 7324.66    | 10730.04  | 6935.94   | 44      |
| H5A  | 4081.77    | 11393.48  | 6396.44   | 45      |
| H5B  | 4603.68    | 12586.6   | 6643.35   | 45      |
| H5C  | 4223.64    | 11265.69  | 6865.86   | 45      |
| H7A  | 7820.45    | 10667.69  | 6204.07   | 57      |
| H7B  | 7602.05    | 10656.01  | 5737.09   | 57      |
| H7C  | 7169.5     | 9476.05   | 6007.83   | 57      |
| H8A  | 5965.61    | 13270.57  | 6062.31   | 64      |
| H8B  | 6904.83    | 12945.64  | 5781.66   | 64      |
| H8C  | 7070.41    | 12978.13  | 6251.48   | 64      |
| H9A  | 5399.63    | 9943.03   | 5738.56   | 67      |
| H9B  | 5869.71    | 11101.97  | 5469.56   | 67      |
| H9C  | 4949.64    | 11433.2   | 5758.91   | 67      |
| H12  | 5174.75    | 7569.33   | 5987.16   | 32      |
| H13E | 3105.97    | 6997.67   | 6179.86   | 39      |
| H13F | 3560.79    | 8474.67   | 6131.14   | 39      |
| H14E | 3828.74    | 8067.55   | 5455.41   | 47      |
| H14F | 3389.68    | 6580.59   | 5502.76   | 47      |
| H15E | 1783.67    | 7415.03   | 5641.54   | 62      |
| H15F | 2204.47    | 8915.16   | 5636.7    | 62      |
| H16E | 1976.85    | 7237.78   | 4976.97   | 84      |
| H16F | 2494.55    | 8683.02   | 4960.64   | 84      |
| H17G | 888.04     | 8889.99   | 4720.34   | 118     |
| H17H | 914.19     | 9621.49   | 5141.61   | 118     |
| H17I | 423.07     | 8158.24   | 5098.01   | 118     |
| H1A  | 11420 (20) | 7160 (30) | 6549 (10) | 38 (10) |
| H1AA | 11147.67   | 6057.84   | 7630.66   | 34      |
| H1AB | 11620.04   | 6058.64   | 7196.27   | 34      |
| H2AA | 9486.04    | 6268.74   | 7311.94   | 30      |
| H2AB | 10021.11   | 4839.1    | 7276.74   | 30      |
| H3A  | 9217.97    | 5428.92   | 6676.18   | 29      |
| H4AA | 12263.87   | 3577.62   | 6969.92   | 42      |
| H4AB | 11888.51   | 2051.59   | 6947.6    | 42      |
| H4AC | 11307.49   | 3101.25   | 7222.16   | 42      |
| H5AA | 9210.18    | 2949.04   | 6848.96   | 45      |
| H5AB | 9599.36    | 1652.76   | 6616.63   | 45      |
| H5AC | 9092.38    | 2874.86   | 6377.69   | 45      |
| H7AA | 12262.15   | 4745.62   | 6025.19   | 56      |
| H7AB | 12727.61   | 3524.21   | 5779.73   | 56      |
| H7AC | 12851.35   | 3558.76   | 6251.2    | 56      |
| H8AA | 12062.88   | 1238.12   | 6261.6    | 75      |

|      |          |         |         |    |
|------|----------|---------|---------|----|
| H8AB | 11941.57 | 1298.42 | 5790.28 | 75 |
| H8AC | 10969.35 | 998.99  | 6056.24 | 75 |
| H9AA | 10013    | 2968.98 | 5753.8  | 74 |
| H9AB | 10971.47 | 3164.23 | 5472.63 | 74 |
| H9AC | 10569.43 | 4394.98 | 5730.82 | 74 |
| H12B | 10301.43 | 6787.82 | 5991.73 | 40 |
| H12A | 10193.33 | 6655.78 | 5968.7  | 40 |
| H13A | 8794.88  | 5556.39 | 6038.47 | 52 |
| H13B | 8155.99  | 6918.95 | 6032.06 | 52 |
| H14A | 8690.87  | 7361.51 | 5385    | 57 |
| H14B | 9368.23  | 6031.18 | 5390.57 | 57 |
| H15A | 7945.99  | 5598.31 | 5024.55 | 62 |
| H15B | 7888.69  | 4730.12 | 5418.87 | 62 |
| H16A | 6728.87  | 6373.93 | 5663.55 | 68 |
| H16B | 6308.45  | 5433.25 | 5314.29 | 68 |
| H17A | 7141     | 7939.55 | 5111.17 | 91 |
| H17B | 6000.36  | 7887    | 5271.76 | 91 |
| H17C | 6285.37  | 7098.9  | 4876.42 | 91 |
| H13C | 8139.8   | 7329.18 | 6186.5  | 52 |
| H13D | 8542.42  | 5826.27 | 6129.04 | 52 |
| H14C | 8422.34  | 7764.28 | 5503.61 | 57 |
| H14D | 8803.21  | 6251.9  | 5447.99 | 57 |
| H15C | 6789.25  | 7020.36 | 5650.27 | 62 |
| H15D | 7156.2   | 5494.65 | 5630.9  | 62 |
| H16C | 7124.97  | 7211.16 | 4960.97 | 68 |
| H16D | 7366.58  | 5641.08 | 4954.51 | 68 |
| H17D | 5737.49  | 6075.83 | 4720.07 | 91 |
| H17E | 5453.97  | 6737.85 | 5135.09 | 91 |
| H17F | 5703.55  | 5169.06 | 5110.12 | 91 |

**Table S-17. Atomic Occupancy for 10a.**

| <b>Atom</b> | <b>Occupancy</b> | <b>Atom</b> | <b>Occupancy</b> | <b>Atom</b> | <b>Occupancy</b> |
|-------------|------------------|-------------|------------------|-------------|------------------|
| H12B        | 0.296 (4)        | H12A        | 0.704 (4)        | C13B        | 0.296 (4)        |
| H13A        | 0.296 (4)        | H13B        | 0.296 (4)        | C14B        | 0.296 (4)        |
| H14A        | 0.296 (4)        | H14B        | 0.296 (4)        | C15B        | 0.296 (4)        |
| H15A        | 0.296 (4)        | H15B        | 0.296 (4)        | C16B        | 0.296 (4)        |
| H16A        | 0.296 (4)        | H16B        | 0.296 (4)        | C17B        | 0.296 (4)        |
| H17A        | 0.296 (4)        | H17B        | 0.296 (4)        | H17C        | 0.296 (4)        |
| C13A        | 0.704 (4)        | H13C        | 0.704 (4)        | H13D        | 0.704 (4)        |
| C14A        | 0.704 (4)        | H14C        | 0.704 (4)        | H14D        | 0.704 (4)        |

|      |           |      |           |      |           |
|------|-----------|------|-----------|------|-----------|
| C15A | 0.704 (4) | H15C | 0.704 (4) | H15D | 0.704 (4) |
| C16A | 0.704 (4) | H16C | 0.704 (4) | H16D | 0.704 (4) |
| C17A | 0.704 (4) | H17D | 0.704 (4) | H17E | 0.704 (4) |
| H17F | 0.704 (4) |      |           |      |           |

### VIII. References for X-ray.

1. Bruker-AXS (2014). *APEX2*. Version 2014.11-0. Madison, Wisconsin, USA.
2. Krause, L., Herbst-Irmer, R., Sheldrick, G. M. & Stalke, D. (2015). *J. Appl. Cryst.* 48, 3-10.
3. Sheldrick, G. M. (2013b). *XPREP*. Version 2013/1. Georg-August-Universität Göttingen, Göttingen, Germany.
4. Sheldrick, G. M. (2013a). The *SHELX* homepage, <http://shelx.uni-ac.gwdg.de/SHELX/>.
5. Sheldrick, G. M. (2015a). *Acta Cryst. A*, 71, 3-8.
6. Sheldrick, G. M. (2015b). *Acta Cryst. C*, 71, 3-8.
7. Dolomanov, O. V., Bourhis, L. J., Gildea, R. J., Howard, J. A. K. & Puschmann, H. (2009). *J. Appl. Crystallogr.* 42, 339-341.
8. Guzei, I. A. (2007-2013). Programs *Gn*. University of Wisconsin-Madison, Madison, Wisconsin, USA.
